# Supplementary material for: Competitive profiling of ligandable cysteines in Staphylococcus aureus with an organogold compound
Source: Royal Society of Chemistry journal article supplement (doi:10.1039/d2cc01259f), 2022-01-01
Supplement: d2cc01259f2.xlsx [file d2cc01259f2.xlsx]

## Sheet: Table of Contents
Worksheet	Information
Cysteines ligandable by 1	Competitive data with compound 1 in the strain S. aureus SH1000 filtered to include only the data at 50 µM and below as well as only cysteines that are a hit for at least one of those concentrations
Filtered data table	Competitive data with compound 1 in the strain S. aureus SH1000 filtered to include only cysteines that are quantified for at least 1 concentration
Complete data	All competitive data with compound 1 in the strain S. aureus SH1000
100 µM 1	Competitive data for 100 µM 1 in S. aureus SH1000
50 µM 1	Competitive data for 50 µM 1 in S. aureus SH1000
20 µM 1	Competitive data for 20 µM 1 in S. aureus SH1000
10 µM 1	Competitive data for 10 µM 1 in S. aureus SH1000
Column header	Information
Identifier	Identifier of the quantified cysteine in the format "UniProt code"_"C""residue number"
Leading razor protein	UniProt code of the leading razor protein
Sequence	Sequence of the detected peptide (If several peptides were combined for the same cysteine, the shortest sequence is given); * indicates the cysteine modified with IA-alkyne and the isoDTB tag
Gene name	Name of the corresponding gene according to UniProt
Name	Name of the protein according to UniProt
Essential?	Yes, if the gene is essential; No, if the gene is non-essential according to the DEG database
Functional site	Whether or not a residue is within five residues of an annotated functional site according to UniProt
Liganded cysteine?	Yes, if the cysteine is significantely engaged for at least one condition of 50 µM 1 or below (p < 0.05 and log2(R) > 2)
Ligandable by a-chloroacetamides?	Yes, if found as ligandable cysteine by Zanon et al. (doi.org/10.1002/anie.201912075)
Median log2(R)	Median of log2(R) for the respective condition (If there is a "+" in the following column, this compound is considered a hit indicating p < 0.05 and log2(R) > 2)
log2(R)	Individual values of log2(R) for the respective condition
Neg. log10(p)	Result of a one-sample t-test (-log10(p)) testing the probability that the value of log2(R) is equal to 0
T-test significant	"+", if p < 0.05
Hit?	"+", if p < 0.05 and log2(R) > 2

## Sheet: Cysteines ligandable by 1
Identifier	Leading razor protein	Sequence	Gene name	Name	Essential?	Functional site	Liganded Cysteine?	Ligandable by a-chloroacetamides?	Median log2(R) 50 µM 1		Median log2(R) 20 µM 1		Median log2(R) 10 µM 1		log2(R) 50 µM 1 replicate 1	log2(R) 50 µM 1 replicate 2	log2(R) 20 µM 1 replicate 1	log2(R) 20 µM 1 replicate 2	log2(R) 10 µM 1 replicate 1	log2(R) 10 µM 1 replicate 2
Q2G032_C151	Q2G032	TIVFNTNHQELDGSETVVSGASUTTNSLAPVAK	SAOUHSC_00795	Glyceraldehyde-3-phosphate dehydrogenase	yes	Functional site	yes	yes	3.53562	+	3.17951	+	2.72929	+	3.42358	3.64766	3.20641	3.15261	2.52732	2.93127
Q2FWA0_C2	Q2FWA0	UGIVGYIGYDNAK	glmS	Glutamine--fructose-6-phosphate aminotransferase [isomerizing]	yes	Functional site	yes	yes	3.33116	+	2.95669	+	0.920914		3.11105	3.55127	2.98435	2.92903	0.89817	0.943659
Q2FZS0_C112	Q2FZS0	VASMDQLAAUSGFMYSMITAK	fabH	3-oxoacyl-[acyl-carrier-protein] synthase 3	yes	Functional site	yes	yes	5.0986	+					5.01578	5.18142
Q2G1W4_C44	Q2G1W4	VAUETTVTTGMALIAGEISTTTYVDIPK	metK	S-adenosylmethionine synthase	yes	Functional site	yes	no	2.66348	+	1.07498		0.317722		2.62171	2.70525	1.15452	0.995448	0.329181	0.306262
Q2FW19_C24	Q2FW19	EYTRUER	rpsZ	30S ribosomal protein S14 type Z	yes	Functional site	yes	no	2.81346	+	1.23666		0.294735		2.69006	2.93685	1.29578	1.17754	0.356933	0.232538
Q2G1W4_C275	Q2G1W4	HGGGUFSGK	metK	S-adenosylmethionine synthase	yes	Functional site	yes	yes	2.65464	+	1.15492		0.0670681		2.64711	2.66218	1.19711	1.11274	0.0746424	0.0594937
Q2G0S3_C100	Q2G0S3	EGTTIVVUGDTPLITK	glmU	Bifunctional protein GlmU	yes	Functional site	yes	yes	2.30682	+	0.258942		-0.550364		2.42812	2.18553	0.540929	-0.0230454	-0.499341	-0.601387
Q2FXV6_C102	Q2FXV6	TPNPDVMUNK	mnmA	tRNA-specific 2-thiouridylase MnmA	yes	Functional site	yes	yes	2.24021	+	0.920075		-0.845415		2.10873	2.3717	1.00043	0.839718	-0.9407	-0.75013
O06446_C829	O06446	NDDUPCGSGK	secA1	Protein translocase subunit SecA 1	yes	Functional site	yes	no	2.96405	+	0.511933		0.142507		2.91812	3.00997	0.545914	0.477952	0.240453	0.0445598
Q2G1B9_C38	Q2G1B9	PLYMSIUAADQR	tarJ	Ribulose-5-phosphate reductase 1	yes	Functional site	yes	yes	2.29183	+	0.538584		0.484721		2.43555	2.14812	0.542109	0.535058	0.427928	0.541515
Q2G041_C134	Q2G041	GVSYUAVCDGAFFK	SAOUHSC_00785	Thioredoxin reductase	yes		yes	yes	2.5032	+	0.72791		-0.467565		2.53794	2.46845	0.80331	0.652509	-0.368495	-0.566635
Q2FY73_C143	Q2FY73	LTFHGVCETUQAK	SAOUHSC_01592	Transcriptional regulator, Fur, putative	yes		yes	no	3.63345	+	3.33586	+	1.89688		3.55397	3.71293	3.31037	3.36135	1.92638	1.86738
Q2G111_C16	Q2G111	VUYFTANGITHIDYK	rpsR	30S ribosomal protein S18	yes		yes	no	3.73977	+	2.4283	+	0.951838		3.78604	3.6935	2.58122	2.27537	0.905043	0.998634
Q2FY43_C49	Q2FY43	DLGIQTVAIYSEGDKDALHTQIADEAYUVGPTLSK	SAOUHSC_01623	Acetyl-CoA carboxylase, biotin carboxylase	yes		yes	no	2.61434	+	2.15699	+	0.291148		2.64642	2.58227	2.14897	2.16501	0.354678	0.227618
Q2G078_C716	Q2G078	LLSVEEUTSCSI	SAOUHSC_00742	Ribonucleoside-diphosphate reductase	yes		yes	yes	3.2085	+	0.700604		-0.686809		3.33528	3.08171	0.743386	0.657823	-0.656899	-0.716718
Q2FWL2_C14	Q2FWL2	TKDILILAVETSUDETSVSVIK	tsaD	tRNA N6-adenosine threonylcarbamoyltransferase	yes		yes	yes	2.20469	+	1.21728		0.1923		2.34605	2.06333	1.18155	1.25302	0.108759	0.275841
Q2FXM9_C410	Q2FXM9	QUSIVWGVQPVVK	pyk	Pyruvate kinase	yes		yes	yes	2.65823	+	1.6666		-0.00562012		2.54914	2.76731	1.73347	1.59973	0.0577744	-0.0690146
Q2FZ19_C372	Q2FZ19	IHASSHGUMEELK	rnj2	Ribonuclease J 2	yes		yes	yes	2.60811	+	1.26572		0.808694		2.4845	2.73173	1.46326	1.06819	0.752577	0.86481
Q2G0I6_C324	Q2G0I6	TSGAGGGDUGITIINK	SAOUHSC_00579	Phosphomevalonate kinase	yes		yes	yes	2.32591	+	1.34492		-0.0601887		2.29081	2.36101	1.37345	1.31638	-0.0773424	-0.043035
Q2FZ43_C86	Q2FZ43	VILMUPQGEPFSHQK	trmD	tRNA (guanine-N(1)-)-methyltransferase	yes		yes	yes	3.15465	+			0.345625		3.26488	3.04441			0.454176	0.237074
Q2G1Z8_C1030	Q2G1Z8	GUTGVKR	polC	DNA polymerase III PolC-type	yes		yes	yes	2.2439	+	0.908238		-0.214695		2.10229	2.38551	0.918539	0.897937	-0.143421	-0.28597
Q2G2J2_C171	Q2G2J2	NLYTSGQUTYYVFDR	ssaA2	Staphylococcal secretory antigen ssaA2	yes		yes	no	2.62878	+	1.37497		0.0275883		2.74013	2.51743	1.41143	1.33851	0.113034	-0.0578571
Q2G0I6_C95	Q2G0I6	SUDIAMK	SAOUHSC_00579	Phosphomevalonate kinase	yes		yes	no	2.06688	+					2.02581	2.10796
Q2G0S2_C173	Q2G0S2	DDPNINPEEUVVVSPDHGGVTR	prs	Ribose-phosphate pyrophosphokinase	yes		yes	yes	2.02522	+	0.684009		-0.726719		2.07993	1.97051	0.715811	0.652207	-0.589333	-0.864105
Q2FW29_C11	Q2FW29	PSVKPIUEK	rpmJ	50S ribosomal protein L36	yes		yes	no	2.90339	+	1.37619		-0.0480218		2.84901	2.95777	1.42738	1.32501	0.0378794	-0.133923
Q2FXU4_C191	Q2FXU4	HFEPVIHEFUSDCQSR	hisS	Histidine--tRNA ligase	yes		yes	no	2.34444	+	1.37027		0.990084		2.31696	2.37192	1.34301	1.39753	1.03351	0.946656
Q2FWF5_C94	Q2FWF5	IALFAGIDKUR	fabZ	3-hydroxyacyl-[acyl-carrier-protein] dehydratase FabZ	yes		yes	no	2.16389	+	0.696169		-0.187608		2.00155	2.32622	0.721679	0.670659	-0.146899	-0.228317
Q2G0Y7_C307	Q2G0Y7	VGIGPGSIUTTR	guaB	Inosine-5'-monophosphate dehydrogenase	no	Functional site	yes	yes	3.27919	+	2.6098	+	1.71213		3.2154	3.34298	2.58729	2.63231	1.65251	1.77176
Q2FV75_C130	Q2FV75	MSAQAVGGAVGSNPLSIIVPUHR	SAOUHSC_02861	Methylated-DNA--protein-cysteine methyltransferase	no	Functional site	yes	yes	4.33736	+	2.03296	+	-0.057328		4.2149	4.45983	2.04953	2.01639	-0.0357419	-0.0789141
Q2G1H4_C147	Q2G1H4	LISNPGUFPTATLLALHPLISEK	argC	N-acetyl-gamma-glutamyl-phosphate reductase	no	Functional site	yes	no	1.90571		2.02801	+	2.7294	+	1.9214	1.89002	2.10715	1.94886	2.87525	2.58354
O52582_C43	O52582	DMSFANUALPYVIGEVVEDR	cdr	Coenzyme A disulfide reductase	no	Functional site	yes	no			3.08834	+	2.94847				3.15232	3.02436	3.59521	2.30173
Q2FVA6_C75	Q2FVA6	IIASUSFAK	SAOUHSC_02827	Uncharacterized protein	no		yes	no	5.15095	+	6.02262	+	6.06993	+	4.90776	5.39414	5.96324	6.082	6.15127	5.98859
Q2G1G7_C269	Q2G1G7	QIUPHSIQPQFTTQR	SAOUHSC_00156	Uncharacterized protein	no		yes	no	3.99099	+	2.20736	+	1.12422		3.85459	4.12739	2.2681	2.14662	1.14633	1.10212
Q2FWE4_C69	Q2FWE4	ETGVTFAFQGUEHINR	SAOUHSC_02355	UPF0340 protein SAOUHSC_02355	no		yes	yes	2.63405	+	2.68437	+	1.65288		2.54678	2.72131	2.63953	2.7292	1.63659	1.66916
Q2G1W0_C168	Q2G1W0	SULNDCYDK	SAOUHSC_02574	Uncharacterized protein	no		yes	no	3.90032	+	2.37425	+	1.28585		3.77661	4.02403	2.43691	2.31159	1.28729	1.2844
Q2FY47_C46	Q2FY47	LSAAUDTTLK	xseB	Exodeoxyribonuclease 7 small subunit	no		yes	no	3.62197	+	2.75777	+	1.18522		3.46362	3.78031	2.68507	2.83048	1.22293	1.1475
Q2G066_C30	Q2G066	HSETUPISANAYDQFNK	SAOUHSC_00755	Uncharacterized protein	no		yes	no	2.0713	+	2.63454	+	2.30284	+	1.98637	2.15623	2.60623	2.66284	2.45223	2.15345
Q2G2G0_C133	Q2G2G0	YDEVTIYUK	SAOUHSC_00717	Uncharacterized protein	no		yes	no	2.22304	+	3.08612	+	1.94333		2.17019	2.27589	2.91966	3.25258	1.86711	2.01955
Q2FXK3_C85	Q2FXK3	FTDISIEQQSIGTAULNNGK	SAOUHSC_01831	Uncharacterized protein	no		yes	no	2.8494	+	2.16858	+	1.06937		2.73645	2.96235	2.24576	2.09139	1.1169	1.02184
Q2G1T3_C54	Q2G1T3	ATNPEQLFAAGYASUFNGAFDLILK	SAOUHSC_00831	Organic hydroperoxide resistance protein-like	no		yes	no	2.40759		2.03627	+	0.669435		2.08536	2.72981	2.14245	1.93009	0.670206	0.668664
Q2FXH9_C466	Q2FXH9	KQLFNATSIYLEAIYSLUVEE	SAOUHSC_01868	Putative dipeptidase SAOUHSC_01868	no		yes	no	0.965448		2.39853	+			0.858379	1.07252	2.52035	2.27671
Q2FZV6_C284	Q2FZV6	FDMUGAANVVGIIEAASR	SAOUHSC_00879	Probable cytosol aminopeptidase	no		yes	yes	3.96718	+	1.81249		0.04291		3.66982	4.26454	1.81783	1.80715	0.0585243	0.0272956
Q2FXZ6_C11	Q2FXZ6	STVAFHTLGUK	SAOUHSC_01679	Uncharacterized protein	no		yes	no	3.48246	+	1.99166		0.542549		3.31288	3.65203	2.02141	1.96192	0.510658	0.574441
Q2G000_C29	Q2G000	FEAGWUPDCR	SAOUHSC_00834	Thioredoxin, putative	no		yes	yes	3.85343	+	0.570248		-0.442678		3.7284	3.97845	0.629184	0.511313	-0.378254	-0.507103
Q2FWD5_C4	Q2FWD5	MEVUPYLEETFK	SAOUHSC_02364	Uncharacterized protein	no		yes	yes	2.77144	+			0.673802		2.84623	2.69664			0.861558	0.486045
Q2G099_C193	Q2G099	VGDYUENRI	SAOUHSC_00722	Para-aminobenzoate synthase, glutamine amidotransferase, component II, putative	no		yes	no	2.53031	+	1.2261		0.572624		2.5279	2.53272	1.30947	1.14274	0.558268	0.586981
Q2FZU1_C116	Q2FZU1	TNSVGIAHGUTGK	argG	Argininosuccinate synthase	no	Functional site	yes	yes	3.0977	+	1.53534		0.0948417		3.11649	3.07891	1.66172	1.40895	0.0430836	0.1466
Q2FZJ0_C522	Q2FZJ0	GMAEAUDILK	purL	Phosphoribosylformylglycinamidine synthase subunit PurL	no		yes	yes	2.85604	+					2.73288	2.9792
Q2FZ72_C525	Q2FZ72	MVDTUAAEFESSTPYYYGTYETENESIVTDKEK	carB	Carbamoyl-phosphate synthase large chain	no		yes	yes	2.39637	+	1.19795		-0.313729		2.53426	2.25849	1.26951	1.12638	-0.149073	-0.478386
Q2FYR9_C316	Q2FYR9	QLLNDPKEUSEHR	SAOUHSC_01366	Anthranilate synthase component I	no		yes	yes	2.68044	+	0.313756		-0.153646		2.50749	2.8534	0.226755	0.400757	-0.286058	-0.0212333
Q2FVV9_C390	Q2FVV9	YUQAPATK	SAOUHSC_02582	Putative formate dehydrogenase SAOUHSC_02582	no		yes	yes	2.77123	+	1.19075		0.0107757		2.57204	2.97041	1.25011	1.13139	0.0617071	-0.0401557
Q2FW81_C278	Q2FW81	LVNVDUK	SAOUHSC_02423	Probable uridylyltransferase SAOUHSC_02423	no		yes	no	2.68268	+	1.84148				2.50587	2.85949	1.96351	1.71945
Q2FZ31_C225	Q2FZ31	YFEGUMPFEVMAER	trmFO	Methylenetetrahydrofolate--tRNA-(uracil-5-)-methyltransferase TrmFO	no		yes	no	3.0897	+					3.0571	3.12229
Q2FV28_C200	Q2FV28	SIEMUNDYNIFR	queH	Epoxyqueuosine reductase QueH	no		yes	no	2.85861	+	0.970406				2.73916	2.97807	1.22694	0.713872
P0A0K3_C105	P0A0K3	NDVPTFAIUHGPQILIDTDDLK	SAOUHSC_02013	Uncharacterized protein SAOUHSC_02013	no		yes	yes	2.17202	+	1.46968		0.325023		2.012	2.33204	1.53334	1.40602	0.284857	0.365188
Q2FXX1_C228	Q2FXX1	DUSVQRK	SAOUHSC_01709	Acetyl-CoA carboxylase, biotin carboxylase, putative	no		yes	yes	2.9571	+	1.07824		0.0161903		2.79716	3.11705	1.35668	0.799792	0.103665	-0.0712848
Q2G0S9_C14	Q2G0S9	NSIDUHVGNR	SAOUHSC_00465	Uncharacterized protein	no		yes	no	2.45754	+	1.15852		0.362903		2.48702	2.42806	1.16511	1.15192	0.379843	0.345964
Q2FZW2_C51	Q2FZW2	LQLHGACGTUPSSTITLK	SAOUHSC_00873	Uncharacterized protein	no		yes	no	2.99218	+	1.30644		0.185313		2.89949	3.08488	1.33245	1.28042	0.222928	0.147697
Q2FXL3_C60	Q2FXL3	LISVVPSIDTGVUDQQTR	tpx	Thiol peroxidase	no	Functional site	yes	yes	2.44748	+	1.1515		-0.543504		2.37354	2.52143	1.26879	1.03422	-0.456438	-0.63057
Q2FYP0_C224	Q2FYP0	VTATUAR	asd	Aspartate-semialdehyde dehydrogenase	no	Functional site	yes	no	2.36863	+	1.23359		-0.379752		2.20389	2.53336	1.25163	1.21555	-0.379001	-0.380502
Q2FWD4_C118	Q2FWD4	CVIGLPGGUPLGPRPIDQHIK	murA	UDP-N-acetylglucosamine 1-carboxyvinyltransferase	no	Functional site	yes	yes	2.19783	+	1.24843		0.113319		2.20379	2.19188	1.23097	1.26588	0.134213	0.0924252
Q2FWW3_C407	Q2FWW3	IAFSUVEKEDIPHVFDSIAK	SAOUHSC_02158	Uncharacterized protein	no		yes	yes	2.64414	+	1.17253		0.310133		2.66862	2.61967	1.28315	1.06191	0.262433	0.357833
Q2FWC9_C6	Q2FWC9	ELUFEGITLK	SAOUHSC_02370	Uncharacterized protein	no		yes	yes	2.35363	+	0.906885		0.22666		2.25821	2.44906	0.988094	0.825675	0.247811	0.20551
Q2G1G4_C269	Q2G1G4	FVALNYHAILDUITQSK	SAOUHSC_00160	Uncharacterized protein	no		yes	no	2.36355	+	0.679261		-0.214341		2.35106	2.37604	0.719753	0.638769	-0.214742	-0.213939
Q2FZ13_C151	Q2FZ13	TESIVAGSVUAHK	SAOUHSC_01258	Uncharacterized protein	no		yes	yes	2.06501	+	0.662387		-0.460765		2.13218	1.99783	0.663572	0.661202	-0.509183	-0.412347
Q2FX12_C13	Q2FX12	VDVAFVCLGNIUR	ptpA	Low molecular weight protein-tyrosine-phosphatase PtpA	no	Functional site	yes	yes	2.51987	+	0.405387		0.316767		2.44603	2.59372	0.457929	0.352845	0.42478	0.208753
Q2FZ04_C50	Q2FZ04	AAANIGLEPEEVAIITGIGUSGR	SAOUHSC_01267	Uncharacterized protein	no		yes	yes	2.86328	+	1.16115		-0.236028		2.64268	3.08388	1.22712	1.09518	-0.234448	-0.237609
Q2G1R8_C60	Q2G1R8	LMGIIISENLIEUVK	SAOUHSC_00034	Uncharacterized protein	no		yes	yes	2.16043	+	0.753062				2.12819	2.19267	0.659651	0.846473
Q2FYG1_C43	Q2FYG1	NQDAVDELNTUHTNK	gpsA	Glycerol-3-phosphate dehydrogenase [NAD(P)+]	no		yes	no	2.07836	+	0.859019		0.103361		2.04348	2.11323	0.991918	0.726119	0.199973	0.00674906
Q2G1D8_C691	Q2G1D8	NLTSMLDGYAMQUGHHLNINVFNR	pflB	Formate acetyltransferase	no		yes	yes	2.45066	+					2.47363	2.42769
Q2FV16_C62	Q2FV16	NNAGTGHAALUELNYTVLQPDGSIDIEK	mqo	Probable malate:quinone oxidoreductase	no		yes	yes	2.40714	+	1.58818		0.280168		2.3051	2.50919	1.67007	1.5063	0.200253	0.360083
Q2FYU7_C368	Q2FYU7	GVGIENIUPFSR	katA	Catalase	no		yes	yes	2.2071	+	0.600803		0.044712		2.20817	2.20602	0.663663	0.537942	0.0275787	0.0618453
Q2FVI7_C80	Q2FVI7	YTVIVNDPLMRPIEAUYAR	SAOUHSC_02723	Glycerate kinase, putative	no		yes	yes	2.0121	+					2.00913	2.01507
Q2FY27_C185	Q2FY27	SGUIETVASATGVVNLVNFYYPK	SAOUHSC_01646	Glucokinase, putative	no		yes	no	2.7311	+	1.29244		-0.258263		2.60122	2.86098	1.26087	1.324	-0.245831	-0.270695
Q2G255_C262	Q2G255	QDUVSEFYQLSDLVLLLSEK	SAOUHSC_01475	Uncharacterized protein	no		yes	no	2.5853	+			0.305524		2.54681	2.6238			0.106884	0.504163
Q2G1S1_C33	Q2G1S1	VDMIAUEDTR	rsmI	Ribosomal RNA small subunit methyltransferase I	no		yes	no	2.33605	+			-0.0347864		2.31441	2.35769			0.195096	-0.264668
Q2G222_C513	Q2G222	EVSDSMPYPHGQUTWYVYNR	SAOUHSC_02979	N-acetylmuramoyl-L-alanine amidase domain-containing protein SAOUHSC_02979	no		yes	no	2.26715	+	1.23143				2.14828	2.38601	1.22719	1.23567
Q2FZ17_C175	Q2FZ17	EQSNHNIUYADTEIEAVNYEPR	SAOUHSC_01254	Uncharacterized protein	no		yes	no	2.15391	+	1.25859		-0.38117		2.12684	2.18098	1.28582	1.23137	-0.334007	-0.428333
Q2G0P8_C37	Q2G0P8	FDUVPSQLNYVIK	ctsR	Transcriptional regulator CtsR	no		yes	no	2.08246	+	0.557879		-0.135871		2.09822	2.06671	0.480886	0.634872	-0.345015	0.0732718
Q2FVV9_C147	Q2FVV9	YDPNQUILCGR	SAOUHSC_02582	Putative formate dehydrogenase SAOUHSC_02582	no	Functional site	yes	no	2.14249	+	0.665543		-0.00813085		1.9948	2.29019	0.692874	0.638213	-0.109281	0.0930192
Q2FVV9_C934	Q2FVV9	TSURLEVITK	SAOUHSC_02582	Putative formate dehydrogenase SAOUHSC_02582	no		yes	no	2.28414	+	0.642977		-0.259755		2.40803	2.16024	0.698396	0.587557	-0.223744	-0.295765
Q2G1J4_C258	Q2G1J4	VNIHQPGPGVGGHULAVDPYFIIAK	SAOUHSC_00128	Cap5O protein/UDP-N-acetyl-D-mannosaminuronic acid dehydrogenase	no		yes	yes	2.44346	+	0.0631133		-0.773276		2.36076	2.52617	0.0851349	0.0410917	-0.712215	-0.834337
Q2FZW2_C48	Q2FZW2	LQLHGAUGTCPSSTITLK	SAOUHSC_00873	Uncharacterized protein	no		yes	no	2.80248	+	0.479929		-0.890824		2.75448	2.85048	0.594166	0.365693	-0.896254	-0.885393
Q2FZJ1_C148	Q2FZJ1	VIYPVAHGEGHYYUTDEIYQQLK	purQ	Phosphoribosylformylglycinamidine synthase subunit PurQ	no		yes	no	2.35949	+	1.33767		-0.281964		2.50482	2.21416	1.23174	1.44361	-0.564649	0.000721167
Q2FVQ5_C63	Q2FVQ5	LAQPGEESSNVWNNAGTGHSALUELNYTK	mqo	Probable malate:quinone oxidoreductase	no		yes	yes	2.49156	+	0.0445204		-0.948406		2.35024	2.63287	0.0600474	0.0289934	-0.912537	-0.984274
Q2FXP2_C153	Q2FXP2	GVNDNQLDIEAFDIFSNASUTTNCIGPVAK	SAOUHSC_01794	Glyceraldehyde-3-phosphate dehydrogenase	no	Functional site	yes	yes	2.01111	+	0.922915		-0.241255		1.89832	2.1239	0.997112	0.848718	-0.158236	-0.324274
Q2FXX2_C221	Q2FXX2	EVTLQADTIUVHGDGEHALLFVSK	SAOUHSC_01708	UPF0271 protein SAOUHSC_01708	no		yes	no	2.19086	+	0.338185		-0.826187		2.18744	2.19429	0.416725	0.259646	-0.756203	-0.896171
Q2G0A0_C105	Q2G0A0	GGUSPVGMK	SAOUHSC_00705	Cys-tRNA(Pro)/Cys-tRNA(Cys) deacylase	no		yes	no	2.48718	+	-0.117506		-0.680047		2.42691	2.54745	-0.122413	-0.1126	-0.601299	-0.758794
Q2FXG1_C254	Q2FXG1	LHSAULTGDIFHSQR	ribBA	Riboflavin biosynthesis protein RibBA	no	Functional site	yes	yes	3.97724	+	1.94413		0.663303		4.01855	3.93593	1.93644	1.95181	0.617581	0.709026
Q2FVV9_C157	Q2FVV9	CVEAUQDIEVNETIR	SAOUHSC_02582	Putative formate dehydrogenase SAOUHSC_02582	no	Functional site	yes	no	3.17468	+	1.39657		-0.144209		3.16728	3.18209	2.14264	0.650489	-0.150785	-0.137632
Q2G2W9_C198	Q2G2W9	ISGAUGR	SAOUHSC_00455	Uncharacterized protein	no		yes	no	2.23597	+	1.54309		0.318024		2.17188	2.30007	1.90292	1.18326	0.255319	0.380729
Q2FYQ9_C61	Q2FYQ9	SIUNCPHADGR	SAOUHSC_01376	Uncharacterized protein	no		yes	no	4.05252	+	0.467503		-0.273801		3.78538	4.31967	0.624496	0.31051	-0.303082	-0.244519
Q2FVS9_C61	Q2FVS9	AVUGFSK	SAOUHSC_02613	Uncharacterized protein	no		yes	no	2.47306	+	1.04128		0.0473831		2.41689	2.52922	1.02751	1.05506	0.132906	-0.0381396
Q2FYQ9_C23	Q2FYQ9	GFNYYQSEUVINLK	SAOUHSC_01376	Uncharacterized protein	no		yes	no	2.13261	+	1.31173		0.597445		2.06698	2.19824	1.31504	1.30842	0.621806	0.573084
Q2G1S1_C43	Q2G1S1	LUNHYDIPTPLK	rsmI	Ribosomal RNA small subunit methyltransferase I	no		yes	no	3.29932	+	1.71791		0.244107		3.19374	3.4049	1.81725	1.61857	0.337654	0.15056
P0A0B7_C168	P0A0B7	NPGEVUPAK	ahpC	Alkyl hydroperoxide reductase C	no		yes	yes	2.56082	+	0.5085		-0.265484		2.5585	2.56314	0.640711	0.376288	-0.19794	-0.333029
Q2FZC7_C100	Q2FZC7	QSUSAIVDQLEQPIR	SAOUHSC_01105	Iron-sulphur subunit of succinate dehydrogenase, putative	no		yes	no	2.82628	+	1.68073		0.587684		2.67663	2.97593	1.69182	1.66965	0.705146	0.470222
Q2G243_C99	Q2G243	STLLLQIUASLSQK	radA	DNA repair protein RadA	no		yes	yes	2.07698	+	0.536504		-0.394181		2.15105	2.00292	0.574247	0.498761	-0.38163	-0.406732
Q2FZ66_C131	Q2FZ66	IGUTFCASTLGGLKR	rlmN	Probable dual-specificity RNA methyltransferase RlmN	no	Functional site	yes	yes	3.59976	+			1.38778		3.54794	3.65157			1.49835	1.27721
Q2FZP4_C112	Q2FZP4	TLMAVDSAVMVIDUAK	prfC	Peptide chain release factor 3	no		yes	yes	2.06382	+					1.91299	2.21465
Q2G2A1_C55	Q2G2A1	IIAGGYNGSVAGEVHCIDEGCLIEDGHUIR	SAOUHSC_01692	Uncharacterized protein	no	Functional site	yes	no	3.51284	+	1.08865		-0.0302558		3.61046	3.41522	1.09099	1.08631	-0.0174901	-0.0430215
Q2FZC7_C238	Q2FZC7	LNALMGTGGLQQCGNSQNCVNAUPK	SAOUHSC_01105	Iron-sulphur subunit of succinate dehydrogenase, putative	no		yes	no	2.64772	+	0.97547		0.0903092		2.68113	2.61431	1.02191	0.929033	0.0877344	0.092884
Q2FWM2_C42	Q2FWM2	QIGGAPCNVAUTVQK	SAOUHSC_02267	Fructokinase, putative	no		yes	no	3.56533	+	0.45848		-0.578765		3.36247	3.76818	0.507921	0.409038	-0.671485	-0.486044
Q2FY32_C136	Q2FY32	QLNDLYUSR	aroK	Shikimate kinase	no	Functional site	yes	no	2.13081	+	0.761498		-0.0703362		2.20833	2.05329	0.762476	0.760519	-0.106482	-0.0341899
Q2G0G1_C145	Q2G0G1	VPEKLDPAAASSITUAGVTTYK	adh	Alcohol dehydrogenase	no	Functional site	yes	no	2.08778	+	0.686782		-0.40527		1.99751	2.17805	0.692159	0.681404	-0.404611	-0.405929
Q2FY27_C180	Q2FY27	FKCNUGR	SAOUHSC_01646	Glucokinase, putative	no		yes	no	2.05949	+	-0.457401		-1.12504		1.96628	2.1527	-0.403523	-0.511279	-1.00101	-1.24907
Q2G081_C57	Q2G081	FNCPEFTSLUPITGQPDFATIYISYIPNVK	queF	NADPH-dependent 7-cyano-7-deazaguanine reductase	no	Functional site	yes	no	2.23565	+	-0.132399		-0.377975		2.20292	2.26837	-0.10479	-0.160008	-0.298318	-0.457633
Q2FZH4_C12	Q2FZH4	SEIIVYTQNDUPPCTFVK	SAOUHSC_01030	Uncharacterized protein	no		yes	no	2.06906	+	-1.49785		-2.07481		2.19532	1.9428	-1.4024	-1.59331	-1.74227	-2.40736

## Sheet: Filtered data table
Identifier	Leading razor protein	Sequence	Gene name	Name	Essential?	Functional site	Liganded Cysteine?	Median log2(R) 100 µM 1		Median log2(R) 50 µM 1		Median log2(R) 20 µM 1		Median log2(R) 10 µM 1		log2(R) 100 µM 1 replicate 1	log2(R) 100 µM 1 replicate 2	log2(R) 50 µM 1 replicate 1	log2(R) 50 µM 1 replicate 2	log2(R) 20 µM 1 replicate 1	log2(R) 20 µM 1 replicate 2	log2(R) 10 µM 1 replicate 1	log2(R) 10 µM 1 replicate 2
Q2FVA6_C75	Q2FVA6	IIASUSFAK	SAOUHSC_02827	Uncharacterized protein	no		yes	4.39998	+	5.15095	+	6.02262	+	6.06993	+	4.67463	4.12532	4.90776	5.39414	5.96324	6.082	6.15127	5.98859
Q2G032_C151	Q2G032	TIVFNTNHQELDGSETVVSGASUTTNSLAPVAK	SAOUHSC_00795	Glyceraldehyde-3-phosphate dehydrogenase	yes	Functional site	yes	2.35415	+	3.53562	+	3.17951	+	2.72929	+	2.46435	2.24394	3.42358	3.64766	3.20641	3.15261	2.52732	2.93127
Q2G0Y7_C307	Q2G0Y7	VGIGPGSIUTTR	guaB	Inosine-5'-monophosphate dehydrogenase	no	Functional site	yes	5.04118	+	3.27919	+	2.6098	+	1.71213		5.2061	4.87627	3.2154	3.34298	2.58729	2.63231	1.65251	1.77176
Q2G1G7_C269	Q2G1G7	QIUPHSIQPQFTTQR	SAOUHSC_00156	Uncharacterized protein	no		yes	5.02669	+	3.99099	+	2.20736	+	1.12422		5.12383	4.92955	3.85459	4.12739	2.2681	2.14662	1.14633	1.10212
Q2FWE4_C69	Q2FWE4	ETGVTFAFQGUEHINR	SAOUHSC_02355	UPF0340 protein SAOUHSC_02355	no		yes	5.2673	+	2.63405	+	2.68437	+	1.65288		5.38733	5.14727	2.54678	2.72131	2.63953	2.7292	1.63659	1.66916
Q2G1W0_C168	Q2G1W0	SULNDCYDK	SAOUHSC_02574	Uncharacterized protein	no		yes	4.63473	+	3.90032	+	2.37425	+	1.28585		4.71344	4.55602	3.77661	4.02403	2.43691	2.31159	1.28729	1.2844
Q2FY73_C143	Q2FY73	LTFHGVCETUQAK	SAOUHSC_01592	Transcriptional regulator, Fur, putative	yes		yes	3.24061	+	3.63345	+	3.33586	+	1.89688		3.43563	3.0456	3.55397	3.71293	3.31037	3.36135	1.92638	1.86738
Q2FY47_C46	Q2FY47	LSAAUDTTLK	xseB	Exodeoxyribonuclease 7 small subunit	no		yes	4.3871	+	3.62197	+	2.75777	+	1.18522		4.60372	4.17049	3.46362	3.78031	2.68507	2.83048	1.22293	1.1475
Q2G111_C16	Q2G111	VUYFTANGITHIDYK	rpsR	30S ribosomal protein S18	yes		yes	4.38663	+	3.73977	+	2.4283	+	0.951838		4.59532	4.17794	3.78604	3.6935	2.58122	2.27537	0.905043	0.998634
Q2FWA0_C2	Q2FWA0	UGIVGYIGYDNAK	glmS	Glutamine--fructose-6-phosphate aminotransferase [isomerizing]	yes	Functional site	yes	4.09285	+	3.33116	+	2.95669	+	0.920914		4.24656	3.93913	3.11105	3.55127	2.98435	2.92903	0.89817	0.943659
Q2FV75_C130	Q2FV75	MSAQAVGGAVGSNPLSIIVPUHR	SAOUHSC_02861	Methylated-DNA--protein-cysteine methyltransferase	no	Functional site	yes	4.52651	+	4.33736	+	2.03296	+	-0.057328		4.66118	4.39184	4.2149	4.45983	2.04953	2.01639	-0.0357419	-0.0789141
Q2G066_C30	Q2G066	HSETUPISANAYDQFNK	SAOUHSC_00755	Uncharacterized protein	no		yes	1.95426		2.0713	+	2.63454	+	2.30284	+	2.11567	1.79286	1.98637	2.15623	2.60623	2.66284	2.45223	2.15345
Q2G1H4_C147	Q2G1H4	LISNPGUFPTATLLALHPLISEK	argC	N-acetyl-gamma-glutamyl-phosphate reductase	no	Functional site	yes	2.00948	+	1.90571		2.02801	+	2.7294	+	2.0826	1.93636	1.9214	1.89002	2.10715	1.94886	2.87525	2.58354
Q2FY43_C49	Q2FY43	DLGIQTVAIYSEGDKDALHTQIADEAYUVGPTLSK	SAOUHSC_01623	Acetyl-CoA carboxylase, biotin carboxylase	yes		yes	3.38041	+	2.61434	+	2.15699	+	0.291148		3.42425	3.33657	2.64642	2.58227	2.14897	2.16501	0.354678	0.227618
O52582_C43	O52582	DMSFANUALPYVIGEVVEDR	cdr	Coenzyme A disulfide reductase	no	Functional site	yes	5.34264	+			3.08834	+	2.94847		5.39486	5.29042			3.15232	3.02436	3.59521	2.30173
Q2FZS0_C112	Q2FZS0	VASMDQLAAUSGFMYSMITAK	fabH	3-oxoacyl-[acyl-carrier-protein] synthase 3	yes	Functional site	yes	5.43631	+	5.0986	+					5.37778	5.49483	5.01578	5.18142
Q2FZV6_C284	Q2FZV6	FDMUGAANVVGIIEAASR	SAOUHSC_00879	Probable cytosol aminopeptidase	no		yes	4.51845	+	3.96718	+	1.81249		0.04291		4.69008	4.34682	3.66982	4.26454	1.81783	1.80715	0.0585243	0.0272956
Q2FXZ6_C11	Q2FXZ6	STVAFHTLGUK	SAOUHSC_01679	Uncharacterized protein	no		yes	4.0859	+	3.48246	+	1.99166		0.542549		4.19306	3.97874	3.31288	3.65203	2.02141	1.96192	0.510658	0.574441
Q2G2G0_C133	Q2G2G0	YDEVTIYUK	SAOUHSC_00717	Uncharacterized protein	no		yes	2.72529		2.22304	+	3.08612	+	1.94333		3.00854	2.44204	2.17019	2.27589	2.91966	3.25258	1.86711	2.01955
Q2G000_C29	Q2G000	FEAGWUPDCR	SAOUHSC_00834	Thioredoxin, putative	no		yes	5.65354	+	3.85343	+	0.570248		-0.442678		5.72791	5.57917	3.7284	3.97845	0.629184	0.511313	-0.378254	-0.507103
Q2FWD5_C4	Q2FWD5	MEVUPYLEETFK	SAOUHSC_02364	Uncharacterized protein	no		yes	6.02034	+	2.77144	+			0.673802		6.00663	6.03404	2.84623	2.69664			0.861558	0.486045
Q2G099_C193	Q2G099	VGDYUENRI	SAOUHSC_00722	Para-aminobenzoate synthase, glutamine amidotransferase, component II, putative	no		yes	5.0346	+	2.53031	+	1.2261		0.572624		5.12023	4.94897	2.5279	2.53272	1.30947	1.14274	0.558268	0.586981
Q2G1W4_C44	Q2G1W4	VAUETTVTTGMALIAGEISTTTYVDIPK	metK	S-adenosylmethionine synthase	yes	Functional site	yes	5.16126	+	2.66348	+	1.07498		0.317722		5.19798	5.12453	2.62171	2.70525	1.15452	0.995448	0.329181	0.306262
Q2FZU1_C116	Q2FZU1	TNSVGIAHGUTGK	argG	Argininosuccinate synthase	no	Functional site	yes	3.9146	+	3.0977	+	1.53534		0.0948417		3.85465	3.97455	3.11649	3.07891	1.66172	1.40895	0.0430836	0.1466
Q2G078_C716	Q2G078	LLSVEEUTSCSI	SAOUHSC_00742	Ribonucleoside-diphosphate reductase	yes		yes	5.32583	+	3.2085	+	0.700604		-0.686809		5.34894	5.30272	3.33528	3.08171	0.743386	0.657823	-0.656899	-0.716718
Q2FZJ0_C522	Q2FZJ0	GMAEAUDILK	purL	Phosphoribosylformylglycinamidine synthase subunit PurL	no		yes	5.37757	+	2.85604	+					5.38173	5.3734	2.73288	2.9792
Q2FZ72_C525	Q2FZ72	MVDTUAAEFESSTPYYYGTYETENESIVTDKEK	carB	Carbamoyl-phosphate synthase large chain	no		yes	4.92745	+	2.39637	+	1.19795		-0.313729		4.9091	4.94579	2.53426	2.25849	1.26951	1.12638	-0.149073	-0.478386
Q2FYR9_C316	Q2FYR9	QLLNDPKEUSEHR	SAOUHSC_01366	Anthranilate synthase component I	no		yes	5.34182	+	2.68044	+	0.313756		-0.153646		5.68027	5.00338	2.50749	2.8534	0.226755	0.400757	-0.286058	-0.0212333
Q2FVV9_C390	Q2FVV9	YUQAPATK	SAOUHSC_02582	Putative formate dehydrogenase SAOUHSC_02582	no		yes	4.16333	+	2.77123	+	1.19075		0.0107757		4.24405	4.08262	2.57204	2.97041	1.25011	1.13139	0.0617071	-0.0401557
Q2FW81_C278	Q2FW81	LVNVDUK	SAOUHSC_02423	Probable uridylyltransferase SAOUHSC_02423	no		yes	3.60175	+	2.68268	+	1.84148				3.60502	3.59848	2.50587	2.85949	1.96351	1.71945
Q2FZ31_C225	Q2FZ31	YFEGUMPFEVMAER	trmFO	Methylenetetrahydrofolate--tRNA-(uracil-5-)-methyltransferase TrmFO	no		yes	5.02463	+	3.0897	+					5.23718	4.81209	3.0571	3.12229
Q2FV28_C200	Q2FV28	SIEMUNDYNIFR	queH	Epoxyqueuosine reductase QueH	no		yes	4.25071	+	2.85861	+	0.970406				4.32279	4.17863	2.73916	2.97807	1.22694	0.713872
Q2FW19_C24	Q2FW19	EYTRUER	rpsZ	30S ribosomal protein S14 type Z	yes	Functional site	yes	3.67345	+	2.81346	+	1.23666		0.294735		3.8955	3.45141	2.69006	2.93685	1.29578	1.17754	0.356933	0.232538
P0A0K3_C105	P0A0K3	NDVPTFAIUHGPQILIDTDDLK	SAOUHSC_02013	Uncharacterized protein SAOUHSC_02013	no		yes	4.0304	+	2.17202	+	1.46968		0.325023		4.08507	3.97572	2.012	2.33204	1.53334	1.40602	0.284857	0.365188
Q2FXX1_C228	Q2FXX1	DUSVQRK	SAOUHSC_01709	Acetyl-CoA carboxylase, biotin carboxylase, putative	no		yes	3.89222	+	2.9571	+	1.07824		0.0161903		3.84094	3.9435	2.79716	3.11705	1.35668	0.799792	0.103665	-0.0712848
Q2G0S9_C14	Q2G0S9	NSIDUHVGNR	SAOUHSC_00465	Uncharacterized protein	no		yes	3.90524	+	2.45754	+	1.15852		0.362903		3.86057	3.94991	2.48702	2.42806	1.16511	1.15192	0.379843	0.345964
Q2FWL2_C14	Q2FWL2	TKDILILAVETSUDETSVSVIK	tsaD	tRNA N6-adenosine threonylcarbamoyltransferase	yes		yes	4.24925	+	2.20469	+	1.21728		0.1923		4.39458	4.10392	2.34605	2.06333	1.18155	1.25302	0.108759	0.275841
Q2FXM9_C410	Q2FXM9	QUSIVWGVQPVVK	pyk	Pyruvate kinase	yes		yes	3.42136	+	2.65823	+	1.6666		-0.00562012		3.60601	3.2367	2.54914	2.76731	1.73347	1.59973	0.0577744	-0.0690146
Q2FZW2_C51	Q2FZW2	LQLHGACGTUPSSTITLK	SAOUHSC_00873	Uncharacterized protein	no		yes	3.23863	+	2.99218	+	1.30644		0.185313		3.32294	3.15432	2.89949	3.08488	1.33245	1.28042	0.222928	0.147697
Q2FXL3_C60	Q2FXL3	LISVVPSIDTGVUDQQTR	tpx	Thiol peroxidase	no	Functional site	yes	4.55014	+	2.44748	+	1.1515		-0.543504		4.49294	4.60733	2.37354	2.52143	1.26879	1.03422	-0.456438	-0.63057
Q2G1W4_C275	Q2G1W4	HGGGUFSGK	metK	S-adenosylmethionine synthase	yes	Functional site	yes	3.68114	+	2.65464	+	1.15492		0.0670681		3.80095	3.56133	2.64711	2.66218	1.19711	1.11274	0.0746424	0.0594937
Q2FYP0_C224	Q2FYP0	VTATUAR	asd	Aspartate-semialdehyde dehydrogenase	no	Functional site	yes	4.29636	+	2.36863	+	1.23359		-0.379752		4.43543	4.15729	2.20389	2.53336	1.25163	1.21555	-0.379001	-0.380502
Q2FZ19_C372	Q2FZ19	IHASSHGUMEELK	rnj2	Ribonuclease J 2	yes		yes	2.80313	+	2.60811	+	1.26572		0.808694		2.9676	2.63865	2.4845	2.73173	1.46326	1.06819	0.752577	0.86481
Q2FWD4_C118	Q2FWD4	CVIGLPGGUPLGPRPIDQHIK	murA	UDP-N-acetylglucosamine 1-carboxyvinyltransferase	no	Functional site	yes	3.86704	+	2.19783	+	1.24843		0.113319		4.15196	3.58213	2.20379	2.19188	1.23097	1.26588	0.134213	0.0924252
Q2G0I6_C324	Q2G0I6	TSGAGGGDUGITIINK	SAOUHSC_00579	Phosphomevalonate kinase	yes		yes	3.77872	+	2.32591	+	1.34492		-0.0601887		3.94836	3.60907	2.29081	2.36101	1.37345	1.31638	-0.0773424	-0.043035
Q2FWW3_C407	Q2FWW3	IAFSUVEKEDIPHVFDSIAK	SAOUHSC_02158	Uncharacterized protein	no		yes	3.21587	+	2.64414	+	1.17253		0.310133		3.33414	3.09761	2.66862	2.61967	1.28315	1.06191	0.262433	0.357833
Q2G041_C134	Q2G041	GVSYUAVCDGAFFK	SAOUHSC_00785	Thioredoxin reductase	yes		yes	4.56966	+	2.5032	+	0.72791		-0.467565		4.81593	4.32339	2.53794	2.46845	0.80331	0.652509	-0.368495	-0.566635
Q2FWC9_C6	Q2FWC9	ELUFEGITLK	SAOUHSC_02370	Uncharacterized protein	no		yes	3.80319	+	2.35363	+	0.906885		0.22666		3.99777	3.60861	2.25821	2.44906	0.988094	0.825675	0.247811	0.20551
Q2G1G4_C269	Q2G1G4	FVALNYHAILDUITQSK	SAOUHSC_00160	Uncharacterized protein	no		yes	4.45309	+	2.36355	+	0.679261		-0.214341		4.4518	4.45437	2.35106	2.37604	0.719753	0.638769	-0.214742	-0.213939
Q2FZ13_C151	Q2FZ13	TESIVAGSVUAHK	SAOUHSC_01258	Uncharacterized protein	no		yes	4.96524	+	2.06501	+	0.662387		-0.460765		4.90169	5.02879	2.13218	1.99783	0.663572	0.661202	-0.509183	-0.412347
Q2FX12_C13	Q2FX12	VDVAFVCLGNIUR	ptpA	Low molecular weight protein-tyrosine-phosphatase PtpA	no	Functional site	yes	3.96376	+	2.51987	+	0.405387		0.316767		4.03756	3.88996	2.44603	2.59372	0.457929	0.352845	0.42478	0.208753
Q2FZ04_C50	Q2FZ04	AAANIGLEPEEVAIITGIGUSGR	SAOUHSC_01267	Uncharacterized protein	no		yes	3.40314	+	2.86328	+	1.16115		-0.236028		3.45904	3.34724	2.64268	3.08388	1.22712	1.09518	-0.234448	-0.237609
Q2G1R8_C60	Q2G1R8	LMGIIISENLIEUVK	SAOUHSC_00034	Uncharacterized protein	no		yes	4.22017	+	2.16043	+	0.753062				4.29859	4.14176	2.12819	2.19267	0.659651	0.846473
Q2FZ43_C86	Q2FZ43	VILMUPQGEPFSHQK	trmD	tRNA (guanine-N(1)-)-methyltransferase	yes		yes	3.59762	+	3.15465	+			0.345625		3.70122	3.49403	3.26488	3.04441			0.454176	0.237074
Q2FYG1_C43	Q2FYG1	NQDAVDELNTUHTNK	gpsA	Glycerol-3-phosphate dehydrogenase [NAD(P)+]	no		yes	4.0348	+	2.07836	+	0.859019		0.103361		4.2426	3.82701	2.04348	2.11323	0.991918	0.726119	0.199973	0.00674906
Q2G1D8_C691	Q2G1D8	NLTSMLDGYAMQUGHHLNINVFNR	pflB	Formate acetyltransferase	no		yes	4.55972	+	2.45066	+					4.70443	4.41501	2.47363	2.42769
Q2FV16_C62	Q2FV16	NNAGTGHAALUELNYTVLQPDGSIDIEK	mqo	Probable malate:quinone oxidoreductase	no		yes	2.70296	+	2.40714	+	1.58818		0.280168		2.80329	2.60262	2.3051	2.50919	1.67007	1.5063	0.200253	0.360083
Q2G1Z8_C1030	Q2G1Z8	GUTGVKR	polC	DNA polymerase III PolC-type	yes		yes	3.99082	+	2.2439	+	0.908238		-0.214695		4.17409	3.80756	2.10229	2.38551	0.918539	0.897937	-0.143421	-0.28597
Q2G2J2_C171	Q2G2J2	NLYTSGQUTYYVFDR	ssaA2	Staphylococcal secretory antigen ssaA2	yes		yes	2.8371	+	2.62878	+	1.37497		0.0275883		2.84697	2.82723	2.74013	2.51743	1.41143	1.33851	0.113034	-0.0578571
Q2FYU7_C368	Q2FYU7	GVGIENIUPFSR	katA	Catalase	no		yes	3.79706	+	2.2071	+	0.600803		0.044712		3.91762	3.67649	2.20817	2.20602	0.663663	0.537942	0.0275787	0.0618453
Q2FVI7_C80	Q2FVI7	YTVIVNDPLMRPIEAUYAR	SAOUHSC_02723	Glycerate kinase, putative	no		yes	4.59163	+	2.0121	+					4.55729	4.62597	2.00913	2.01507
Q2FY27_C185	Q2FY27	SGUIETVASATGVVNLVNFYYPK	SAOUHSC_01646	Glucokinase, putative	no		yes	2.79245	+	2.7311	+	1.29244		-0.258263		2.81213	2.77277	2.60122	2.86098	1.26087	1.324	-0.245831	-0.270695
Q2G255_C262	Q2G255	QDUVSEFYQLSDLVLLLSEK	SAOUHSC_01475	Uncharacterized protein	no		yes	3.64883	+	2.5853	+			0.305524		3.38722	3.91044	2.54681	2.6238			0.106884	0.504163
Q2G1S1_C33	Q2G1S1	VDMIAUEDTR	rsmI	Ribosomal RNA small subunit methyltransferase I	no		yes	4.19453	+	2.33605	+			-0.0347864		3.96039	4.42867	2.31441	2.35769			0.195096	-0.264668
Q2G222_C513	Q2G222	EVSDSMPYPHGQUTWYVYNR	SAOUHSC_02979	N-acetylmuramoyl-L-alanine amidase domain-containing protein SAOUHSC_02979	no		yes	2.84852	+	2.26715	+	1.23143				2.93554	2.7615	2.14828	2.38601	1.22719	1.23567
Q2FZ17_C175	Q2FZ17	EQSNHNIUYADTEIEAVNYEPR	SAOUHSC_01254	Uncharacterized protein	no		yes	3.29963	+	2.15391	+	1.25859		-0.38117		3.52444	3.07481	2.12684	2.18098	1.28582	1.23137	-0.334007	-0.428333
Q2G0P8_C37	Q2G0P8	FDUVPSQLNYVIK	ctsR	Transcriptional regulator CtsR	no		yes	3.82043	+	2.08246	+	0.557879		-0.135871		4.01641	3.62445	2.09822	2.06671	0.480886	0.634872	-0.345015	0.0732718
Q2FVV9_C147	Q2FVV9	YDPNQUILCGR	SAOUHSC_02582	Putative formate dehydrogenase SAOUHSC_02582	no	Functional site	yes	3.44892	+	2.14249	+	0.665543		-0.00813085		3.51891	3.37893	1.9948	2.29019	0.692874	0.638213	-0.109281	0.0930192
Q2G0I6_C95	Q2G0I6	SUDIAMK	SAOUHSC_00579	Phosphomevalonate kinase	yes		yes	4.14503	+	2.06688	+					4.21762	4.07245	2.02581	2.10796
Q2FXK3_C85	Q2FXK3	FTDISIEQQSIGTAULNNGK	SAOUHSC_01831	Uncharacterized protein	no		yes			2.8494	+	2.16858	+	1.06937				2.73645	2.96235	2.24576	2.09139	1.1169	1.02184
Q2G0S2_C173	Q2G0S2	DDPNINPEEUVVVSPDHGGVTR	prs	Ribose-phosphate pyrophosphokinase	yes		yes	4.054	+	2.02522	+	0.684009		-0.726719		4.11858	3.98942	2.07993	1.97051	0.715811	0.652207	-0.589333	-0.864105
Q2FVV9_C934	Q2FVV9	TSURLEVITK	SAOUHSC_02582	Putative formate dehydrogenase SAOUHSC_02582	no		yes	3.34471	+	2.28414	+	0.642977		-0.259755		3.43069	3.25873	2.40803	2.16024	0.698396	0.587557	-0.223744	-0.295765
Q2G0S3_C100	Q2G0S3	EGTTIVVUGDTPLITK	glmU	Bifunctional protein GlmU	yes	Functional site	yes	3.87861	+	2.30682	+	0.258942		-0.550364		4.12962	3.62761	2.42812	2.18553	0.540929	-0.0230454	-0.499341	-0.601387
Q2G1J4_C258	Q2G1J4	VNIHQPGPGVGGHULAVDPYFIIAK	SAOUHSC_00128	Cap5O protein/UDP-N-acetyl-D-mannosaminuronic acid dehydrogenase	no		yes	4.12849	+	2.44346	+	0.0631133		-0.773276		4.14299	4.11398	2.36076	2.52617	0.0851349	0.0410917	-0.712215	-0.834337
Q2FZW2_C48	Q2FZW2	LQLHGAUGTCPSSTITLK	SAOUHSC_00873	Uncharacterized protein	no		yes	3.34051	+	2.80248	+	0.479929		-0.890824		3.48556	3.19546	2.75448	2.85048	0.594166	0.365693	-0.896254	-0.885393
Q2FXV6_C102	Q2FXV6	TPNPDVMUNK	mnmA	tRNA-specific 2-thiouridylase MnmA	yes	Functional site	yes	3.40739	+	2.24021	+	0.920075		-0.845415		3.44061	3.37417	2.10873	2.3717	1.00043	0.839718	-0.9407	-0.75013
Q2FZJ1_C148	Q2FZJ1	VIYPVAHGEGHYYUTDEIYQQLK	purQ	Phosphoribosylformylglycinamidine synthase subunit PurQ	no		yes	2.2461	+	2.35949	+	1.33767		-0.281964		2.35007	2.14212	2.50482	2.21416	1.23174	1.44361	-0.564649	0.000721167
Q2FVQ5_C63	Q2FVQ5	LAQPGEESSNVWNNAGTGHSALUELNYTK	mqo	Probable malate:quinone oxidoreductase	no		yes	3.84927	+	2.49156	+	0.0445204		-0.948406		4.04536	3.65317	2.35024	2.63287	0.0600474	0.0289934	-0.912537	-0.984274
Q2FXP2_C153	Q2FXP2	GVNDNQLDIEAFDIFSNASUTTNCIGPVAK	SAOUHSC_01794	Glyceraldehyde-3-phosphate dehydrogenase	no	Functional site	yes	2.39075	+	2.01111	+	0.922915		-0.241255		2.52567	2.25583	1.89832	2.1239	0.997112	0.848718	-0.158236	-0.324274
Q2FXX2_C221	Q2FXX2	EVTLQADTIUVHGDGEHALLFVSK	SAOUHSC_01708	UPF0271 protein SAOUHSC_01708	no		yes	2.79184	+	2.19086	+	0.338185		-0.826187		2.77733	2.80634	2.18744	2.19429	0.416725	0.259646	-0.756203	-0.896171
Q2G0A0_C105	Q2G0A0	GGUSPVGMK	SAOUHSC_00705	Cys-tRNA(Pro)/Cys-tRNA(Cys) deacylase	no		yes	2.66353	+	2.48718	+	-0.117506		-0.680047		2.7721	2.55496	2.42691	2.54745	-0.122413	-0.1126	-0.601299	-0.758794
Q2FXG1_C254	Q2FXG1	LHSAULTGDIFHSQR	ribBA	Riboflavin biosynthesis protein RibBA	no	Functional site	yes	3.59887		3.97724	+	1.94413		0.663303		3.24048	3.95726	4.01855	3.93593	1.93644	1.95181	0.617581	0.709026
Q2FY43_C372	Q2FY43	IESAUYTNYTIPPYYDSMVAK	SAOUHSC_01623	Acetyl-CoA carboxylase, biotin carboxylase	yes		no	4.08941	+	2.51476		1.94733				3.90188	4.27694	1.71	3.31952	1.75322	2.14143
Q2FXJ9_C125	Q2FXJ9	LQNISTNLADUFNLNEQLPLQFLDNVK	SAOUHSC_01835	Uncharacterized protein	no		no	4.55708	+	1.85399		1.02744		0.931577		4.68728	4.42687	1.85929	1.84868	1.1155	0.939377	0.904349	0.958806
Q2G007_C47	Q2G007	ENYFUDR	SAOUHSC_00821	Uncharacterized protein	no		no	3.03316	+	1.91481		1.77013		1.50034		3.17097	2.89535	1.85264	1.97699	1.78301	1.75725	1.43359	1.56708
Q2G0I3_C91	Q2G0I3	LFTGDEGSHUQIAR	SAOUHSC_00582	Uncharacterized protein	no		no	4.34266	+	1.6985		1.49291		0.512977		4.49953	4.18579	1.50686	1.89014	1.5511	1.43472	0.631989	0.393965
Q2G0G1_C37	Q2G0G1	ALKPGEALVQTEYCGVUHTDLHVK	adh	Alcohol dehydrogenase	no	Functional site	no	2.55151	+	3.79749		1.50372		-0.00597297		2.58688	2.51614	3.47936	4.11562	1.60947	1.39797	0.0211954	-0.0331414
Q2FVV9_C157	Q2FVV9	CVEAUQDIEVNETIR	SAOUHSC_02582	Putative formate dehydrogenase SAOUHSC_02582	no	Functional site	yes	3.14437		3.17468	+	1.39657		-0.144209		2.2433	4.04544	3.16728	3.18209	2.14264	0.650489	-0.150785	-0.137632
Q2G2W9_C198	Q2G2W9	ISGAUGR	SAOUHSC_00455	Uncharacterized protein	no		yes	3.39067		2.23597	+	1.54309		0.318024		2.96331	3.81803	2.17188	2.30007	1.90292	1.18326	0.255319	0.380729
Q2FWH6_C63	Q2FWH6	IQIDKPDVILLDLGLPDKDGLULISEIR	SAOUHSC_02315	DNA-binding response regulator, putative	no		no	4.24321	+	2.52126		0.57113		0.105214		4.51437	3.97205	2.81789	2.22463	0.577248	0.565012	-0.0475471	0.257976
Q2G2W9_C161	Q2G2W9	LLGGIGPUGR	SAOUHSC_00455	Uncharacterized protein	no		no	3.83423	+	2.02302		1.1823		0.388085		3.61988	4.04858	1.78935	2.25668	0.804962	1.55964	0.510253	0.265917
Q2FVY1_C156	Q2FVY1	IKNDUDTQLT	SAOUHSC_02541	Molybdopterin-guanine dinucleotide biosynthesis protein MobB	no		no	4.08103	+	1.74983		1.00829		0.424984		4.10115	4.06091	1.6402	1.85945	0.963326	1.05325	0.558953	0.291014
Q2G1T3_C54	Q2G1T3	ATNPEQLFAAGYASUFNGAFDLILK	SAOUHSC_00831	Organic hydroperoxide resistance protein-like	no		yes	2.05702		2.40759		2.03627	+	0.669435		2.22586	1.88819	2.08536	2.72981	2.14245	1.93009	0.670206	0.668664
Q2FYP0_C126	Q2FYP0	GIIANPNUSTIQSVVPLK	asd	Aspartate-semialdehyde dehydrogenase	no	Functional site	no	3.94466	+	1.98643		1.189		0.0227324		4.06221	3.82711	2.06108	1.91177	1.24556	1.13245	0.0313952	0.0140696
Q2G0D6_C152	Q2G0D6	EFETNUDGILR	SAOUHSC_00669	Uncharacterized protein	no		no	3.81404	+	2.3171		0.820679		0.136409		3.9878	3.64028	2.74987	1.88432	0.898154	0.743204	0.181737	0.0910809
Q2FYQ9_C61	Q2FYQ9	SIUNCPHADGR	SAOUHSC_01376	Uncharacterized protein	no		yes	2.75599		4.05252	+	0.467503		-0.273801		2.50312	3.00886	3.78538	4.31967	0.624496	0.31051	-0.303082	-0.244519
Q2FVV9_C150	Q2FVV9	YDPNQCILUGR	SAOUHSC_02582	Putative formate dehydrogenase SAOUHSC_02582	no	Functional site	no	3.5763	+	2.88237		0.597017		-0.0862653		3.78398	3.36863	1.97052	3.79421	0.847275	0.346758	-0.0990463	-0.0734843
Q2G1X7_C40	Q2G1X7	CSWUDSAFTWDGSAK	queE	7-carboxy-7-deazaguanine synthase	no	Functional site	no	3.86896	+			2.08478		0.753233		3.82365	3.91428			1.85913	2.31043	0.925164	0.581303
Q2G1S4_C254	Q2G1S4	MIUSSGNVDSNR	SAOUHSC_00018	Replicative DNA helicase	yes		no	4.74694	+	1.95773		0.275119		-0.276459		4.88796	4.60591	1.83402	2.08144	0.417596	0.132643	-0.262209	-0.290709
Q2G001_C77	Q2G001	QQUHYDAVTK	SAOUHSC_00833	Uncharacterized protein	no		no	3.37063	+	1.76659		1.2833		0.181971		3.36983	3.37143	1.75792	1.77526	1.43924	1.12736	0.193316	0.170627
Q2FVS9_C61	Q2FVS9	AVUGFSK	SAOUHSC_02613	Uncharacterized protein	no		yes	3.0215		2.47306	+	1.04128		0.0473831		2.61339	3.42962	2.41689	2.52922	1.02751	1.05506	0.132906	-0.0381396
Q2G0I6_C304	Q2G0I6	YLUDIAEK	SAOUHSC_00579	Phosphomevalonate kinase	yes		no	4.05678	+	1.90431		0.889447		-0.280817		4.23818	3.87539	1.80012	2.00849	0.932742	0.846152	-0.175713	-0.385922
Q7X2S2_C190	Q7X2S2	NIVIAUGGGGIPVIK	arcC2	Carbamate kinase 2	no		no	3.49027	+	1.60888		1.25268		0.197981		3.5782	3.40235	1.4393	1.77846	1.11293	1.39243	0.403421	-0.00745807
Q2G273_C69	Q2G273	IIGVETGGUPHTAIR	ureG	Urease accessory protein UreG	no		no	4.30337	+			1.47006		0.699415		3.97435	4.63238			1.31545	1.62466	0.743386	0.655443
Q2FY10_C33	Q2FY10	QUKNELLR	SAOUHSC_01664	Putative pyruvate, phosphate dikinase regulatory protein	no		no	5.47107	+	1.62738		0.0597709		-0.755226		5.70664	5.2355	1.58986	1.66489	0.0943712	0.0251706	-0.846324	-0.664128
Q2FYQ9_C23	Q2FYQ9	GFNYYQSEUVINLK	SAOUHSC_01376	Uncharacterized protein	no		yes	2.27608		2.13261	+	1.31173		0.597445		2.45599	2.09616	2.06698	2.19824	1.31504	1.30842	0.621806	0.573084
Q2G255_C322	Q2G255	HGETGFVVDVGDUDSASDYAIR	SAOUHSC_01475	Uncharacterized protein	no		no	4.21364	+	2.08797				0.0149721		4.30385	4.12342	2.2603	1.91564			0.0805212	-0.0505771
Q2G230_C90	Q2G230	VVLUDRYIDSSLAYQGYAR	tmk	Thymidylate kinase	yes		no	2.62916	+	1.69757		1.7389		0.241654		2.58289	2.67543	1.7835	1.61164	1.70439	1.77341	0.424922	0.0583858
Q2FWG2_C190	Q2FWG2	VTGAGULLGGVIAGFLFR	thiM	Hydroxyethylthiazole kinase	no	Functional site	no	3.49708	+	1.16028		1.16968		0.479528		3.50424	3.48993	0.764006	1.55655	1.1626	1.17677	0.328836	0.630219
Q2FYG1_C250	Q2FYG1	LGADPMTFLGLGGIGDLIVTUTSTHSR	gpsA	Glycerol-3-phosphate dehydrogenase [NAD(P)+]	no		no	4.35797	+	1.48028		0.562719		-0.124564		4.51942	4.19653	1.54042	1.42013	0.611645	0.513794	-0.13253	-0.116598
Q2G0I3_C134	Q2G0I3	TIKDVIEDIQKEDLUHENI	SAOUHSC_00582	Uncharacterized protein	no		no	4.14122	+	2.05156		0.381733		-0.367186		4.19692	4.08551	1.83835	2.26478	0.491083	0.272382	-0.343238	-0.391134
Q2FZG9_C406	Q2FZG9	AHGETGVEUGVEEDNVFIFDIGDVLALTHDSAR	rnj1	Ribonuclease J 1	yes		no	3.16426	+	1.62501		1.20304		0.120581		3.29634	3.03219	1.47628	1.77374	1.23174	1.17434	0.130799	0.110363
Q2G2P7_C503	Q2G2P7	QSIYQTTAUH	hutH	Histidine ammonia-lyase	no		no	2.59088	+	1.09601		1.32529		1.05619		2.688	2.49375	0.824483	1.36754	1.42857	1.222	1.04124	1.07114
Q2G292_C238	Q2G292	GEDIGYGHTVNVPLEPYTEDASFLEUFK	SAOUHSC_01849	Uncharacterized protein	no		no	4.53159	+	1.80448		0.0890982		-0.383506		4.81829	4.24489	2.35304	1.25592	0.182184	-0.00398734	-0.445048	-0.321964
Q2G078_C191	Q2G078	GELVSUFLLEVDDSLNSINFIDSTAK	SAOUHSC_00742	Ribonucleoside-diphosphate reductase	yes		no	4.00578	+	1.97288		0.52636		-0.492551		4.14053	3.87103	1.86162	2.08414	0.559211	0.493509	-0.489052	-0.496049
Q2FW29_C11	Q2FW29	PSVKPIUEK	rpmJ	50S ribosomal protein L36	yes		yes	1.77459		2.90339	+	1.37619		-0.0480218		1.96956	1.57962	2.84901	2.95777	1.42738	1.32501	0.0378794	-0.133923
Q2G078_C403	Q2G078	MSNLUTEIFQLQETSIINDYGIEDEIK	SAOUHSC_00742	Ribonucleoside-diphosphate reductase	yes		no	4.1796	+	1.90018		0.438032		-0.518305		4.24641	4.11278	1.85284	1.94752	0.459117	0.416948	-0.454704	-0.581907
Q2FXU4_C191	Q2FXU4	HFEPVIHEFUSDCQSR	hisS	Histidine--tRNA ligase	yes		yes	1.27889		2.34444	+	1.37027		0.990084		1.45486	1.10293	2.31696	2.37192	1.34301	1.39753	1.03351	0.946656
Q2G0Q0_C75	Q2G0Q0	EALQNSTLPMFGTUAGLIVLAQDIVGEEGYLNK	pdxT	Pyridoxal 5'-phosphate synthase subunit PdxT	no	Functional site	no	2.10134	+	1.4495		1.27669		1.02603		2.22848	1.9742	1.48238	1.41662	1.30515	1.24823	1.01764	1.03443
Q2FXA4_C259	Q2FXA4	NFIYTPVGFVUEHLEVLYDNDYECK	hemH	Ferrochelatase	no	Functional site	no	2.6537	+	2.58453		0.758391		-0.154497		2.7135	2.5939	2.30921	2.85985	0.805375	0.711407	-0.118523	-0.19047
Q2FY04_C92	Q2FY04	ASLVSAISQGYRPGDFESITVTVDADKPSSPCGAUR	SAOUHSC_01670	Cytidine deaminase	no		no	2.10957	+	2.31335		1.30906		0.0987528		1.96717	2.25196	1.93134	2.69535	1.33474	1.28339	0.659285	-0.46178
Q2G099_C141	Q2G099	YHSLIADGATFPNULK	SAOUHSC_00722	Para-aminobenzoate synthase, glutamine amidotransferase, component II, putative	no		no	2.67872	+	1.82351		1.12026		0.1535		2.73563	2.62181	1.57526	2.07176	0.98061	1.25991	0.0897693	0.217231
Q2FXT6_C269	Q2FXT6	GMDMFDUVLPTR	tgt	Queuine tRNA-ribosyltransferase	no	Functional site	no	2.68133	+	1.54411		1.50911				2.78921	2.57345	1.03365	2.05457	1.53471	1.48352
Q2FVI7_C265	Q2FVI7	SVNQIPGSGAAGGMGAALLAFUETTLTK	SAOUHSC_02723	Glycerate kinase, putative	no		no	3.03298	+	1.66042		1.00589		0.0133483		3.04663	3.01933	1.8279	1.49293	1.02963	0.982145	-0.395644	0.422341
O05204_C335	O05204	GVAFUPHCDGPLFENK	ahpF	Alkyl hydroperoxide reductase subunit F	no		no	3.40341	+	1.61688		0.551235		0.115225		3.53244	3.27438	1.59565	1.63812	0.58323	0.51924	0.0330882	0.197362
Q2FZJ1_C13	Q2FZJ1	FAVLVFPGSNUDR	purQ	Phosphoribosylformylglycinamidine synthase subunit PurQ	no		no	3.35848	+	1.84205		0.507747		-0.0730511		3.40931	3.30765	1.90458	1.77951	0.535953	0.479541	-0.0312236	-0.114879
Q2FZ69_C16	Q2FZ69	HUNEFINHSNDSNLSSSHDVDESSTK	SAOUHSC_01173	Uncharacterized protein	no		no	3.51552	+			1.40554		0.702933		3.74477	3.28627			1.44377	1.36732	0.214747	1.19112
Q2G0M5_C287	Q2G0M5	QGIANSWPDSIDTSUSR	SAOUHSC_00535	Uncharacterized epimerase/dehydratase SAOUHSC_00535	no		no	2.81579	+	1.29774		1.39539		0.080779		3.00668	2.6249	1.33472	1.26075	1.38771	1.40307	0.067439	0.094119
Q2FZS8_C397	Q2FZS8	AIDLVDQAUATIR	clpB	Chaperone protein ClpB	no		no	3.03355	+	2.02004		0.609703		-0.0813331		3.12176	2.94533	1.85215	2.18792	0.626616	0.59279	-0.07763	-0.0850363
Q2FZ70_C35	Q2FZ70	SPIYUDNR	pyrE	Orotate phosphoribosyltransferase	no		no	2.9078	+	1.99627		0.713528		-0.0686462		3.07847	2.73712	2.01863	1.97391	0.789771	0.637286	-0.0442056	-0.0930868
Q2FXX1_C49	Q2FXX1	GDEQSLHVHLADQAIUIGEANALDSYLNIDR	SAOUHSC_01709	Acetyl-CoA carboxylase, biotin carboxylase, putative	no		no	2.47521	+	2.46183		0.704828		-0.178723		2.3838	2.56662	2.1431	2.78056	0.764601	0.645056	-0.111103	-0.246344
Q2G1Z3_C173	Q2G1Z3	TDIIFLDEPTTYLDIUHQLEILELVQK	SAOUHSC_00652	Iron compound ABC transporter, ATP-binding protein	no		no	4.34945	+	1.42209		0.286477		-0.59654		4.46963	4.22928	1.55282	1.29137	0.420186	0.152768	-0.685292	-0.507788
Q2FZ86_C101	Q2FZ86	MULFEPR	sepF	Cell division protein SepF	yes		no	2.79746	+	1.85971		1.01916		-0.28402		2.96835	2.62658	1.78471	1.93471	1.04977	0.988557	-0.282088	-0.285952
Q53727_C597	Q53727	IUYVAITR	pcrA	ATP-dependent DNA helicase PcrA	yes		no	3.59324	+	1.83937		0.334969		-0.413052		3.60067	3.5858	1.82594	1.85281	0.340178	0.329759	-0.449136	-0.376967
Q2FUV5_C95	Q2FUV5	TGLYSUVDDHLIEAR	SAOUHSC_02996	Peptide methionine sulfoxide reductase, putative	no		no	3.01992	+			1.45269		0.871293		3.07265	2.96719			1.65411	1.25126	0.850079	0.892508
Q2FZ13_C226	Q2FZ13	VVEHPDLFVETSTUTMEDFDYIIELR	SAOUHSC_01258	Uncharacterized protein	no		no	4.40734	+			0.934618				4.54028	4.27441			0.794936	1.0743
O06446_C829	O06446	NDDUPCGSGK	secA1	Protein translocase subunit SecA 1	yes	Functional site	yes	1.71699		2.96405	+	0.511933		0.142507		1.86683	1.56716	2.91812	3.00997	0.545914	0.477952	0.240453	0.0445598
Q2FWF5_C94	Q2FWF5	IALFAGIDKUR	fabZ	3-hydroxyacyl-[acyl-carrier-protein] dehydratase FabZ	yes		yes	2.66057		2.16389	+	0.696169		-0.187608		3.10873	2.21241	2.00155	2.32622	0.721679	0.670659	-0.146899	-0.228317
Q2FYN4_C349	Q2FYN4	LUESGDIIIK	lysA	Diaminopimelate decarboxylase	no	Functional site	no	2.77437	+	1.28404		1.12546		0.0885763		2.91778	2.63097	1.22271	1.34538	1.17296	1.07796	0.115277	0.0618751
Q2G1S1_C43	Q2G1S1	LUNHYDIPTPLK	rsmI	Ribosomal RNA small subunit methyltransferase I	no		yes			3.29932	+	1.71791		0.244107				3.19374	3.4049	1.81725	1.61857	0.337654	0.15056
Q2G2U6_C65	Q2G2U6	DGMEVUR	walR	Transcriptional regulatory protein WalR	yes		no	3.48151	+	1.77758		0.620875		-0.624579		3.60336	3.35966	1.66934	1.88581	0.631523	0.610228	-0.627226	-0.621932
Q2FZG9_C191	Q2FZG9	MAQLGEEGVLULLSDSTNSLVPDFTLSER	rnj1	Ribonuclease J 1	yes		no	2.65076	+	1.58471		1.31621		-0.310369		2.80507	2.49646	1.40283	1.7666	1.37601	1.25641	-0.319028	-0.30171
Q2FV16_C373	Q2FV16	EGUMNHLR	mqo	Probable malate:quinone oxidoreductase	no		no	2.73656	+	1.84087		1.02037		-0.36635		2.85975	2.61337	1.68001	2.00173	1.05977	0.980976	-0.489382	-0.243318
Q2G0Y9_C176	Q2G0Y9	LEEAGLTVSSLUK	xpt	Xanthine phosphoribosyltransferase	no		no	4.30244	+	1.34285		0.231339		-0.65624		4.03386	4.57101	1.29525	1.39045	0.310689	0.151989	-0.657013	-0.655467
Q2FVW3_C186	Q2FVW3	GLIDDIDLKHPDUAK	SAOUHSC_02579	Uncharacterized protein	no		no	2.53915	+	1.77418		1.21525		-0.324185		2.68737	2.39093	1.56744	1.98093	1.43635	0.994155	-0.368319	-0.280051
Q2G2V3_C193	Q2G2V3	NHYASAIGUK	menE	2-succinylbenzoate--CoA ligase	no		no	3.50605	+	1.70878		0.456318		-0.476717		3.61636	3.39575	1.43141	1.98616	0.613626	0.29901	-0.415634	-0.537801
P0A0B7_C168	P0A0B7	NPGEVUPAK	ahpC	Alkyl hydroperoxide reductase C	no		yes	2.36281		2.56082	+	0.5085		-0.265484		2.59297	2.13265	2.5585	2.56314	0.640711	0.376288	-0.19794	-0.333029
Q2G1Z3_C260	Q2G1Z3	TGKPLLVTYDLUR	SAOUHSC_00652	Iron compound ABC transporter, ATP-binding protein	no		no	4.21185	+	1.50773		0.352387		-0.918596		4.1398	4.28391	1.37128	1.64418	0.416948	0.287827	-1.05468	-0.78251
Q2FZ04_C19	Q2FZ04	NNVKPNWCPGUGDFSVQAAIQK	SAOUHSC_01267	Uncharacterized protein	no		no	3.00041	+	2.27341		0.477865		-0.614105		2.93397	3.06685	1.88069	2.66614	0.470303	0.485427	-0.689823	-0.538388
Q2G282_C142	Q2G282	MEIYGVUK	perR	Peroxide-responsive repressor PerR	no	Functional site	no	3.34884	+	1.80592		0.37921		-0.396989		3.48732	3.21036	1.78781	1.82403	0.416301	0.342119	-0.38694	-0.407038
Q2G2V4_C24	Q2G2V4	FISPLTPPTUR	SAOUHSC_01914	Putative membrane protein insertion efficiency factor	no		no	3.48411	+	1.5274		0.35599		-0.240212		3.47521	3.49301	1.46441	1.59039	0.271665	0.440314	-0.277569	-0.202854
Q2FY71_C35	Q2FY71	AEQIIDUAVENGITYFDTADMYDK	SAOUHSC_01594	Uncharacterized protein	no		no	3.32242	+	1.89196		0.303627		-0.416141		3.2712	3.37365	1.46683	2.31708	0.204642	0.402613	-0.335244	-0.497038
Q2FZC7_C100	Q2FZC7	QSUSAIVDQLEQPIR	SAOUHSC_01105	Iron-sulphur subunit of succinate dehydrogenase, putative	no		yes			2.82628	+	1.68073		0.587684			2.67285	2.67663	2.97593	1.69182	1.66965	0.705146	0.470222
Q2FY55_C54	Q2FY55	QDGTTLVMINSVCGUAGGIAR	SAOUHSC_01610	UPF0403 protein SAOUHSC_01610	no		no	3.79649	+			1.22843				3.74459	3.8484			1.32981	1.12704
Q2G2W9_C105	Q2G2W9	LVNUEYTLDK	SAOUHSC_00455	Uncharacterized protein	no		no	2.36975	+	1.67086		0.977748				2.33954	2.39996	1.67238	1.66934	1.03787	0.917623
Q2G243_C99	Q2G243	STLLLQIUASLSQK	radA	DNA repair protein RadA	no		yes	2.79211		2.07698	+	0.536504		-0.394181		3.46284	2.12138	2.15105	2.00292	0.574247	0.498761	-0.38163	-0.406732
Q2FZC7_C228	Q2FZC7	LNALMGTGGLQQUGNSQNCVNACPK	SAOUHSC_01105	Iron-sulphur subunit of succinate dehydrogenase, putative	no		no	2.46991	+	2.12261		0.402003				2.60921	2.33062	1.9042	2.34102	0.407407	0.396598
Q2FZ66_C131	Q2FZ66	IGUTFCASTLGGLKR	rlmN	Probable dual-specificity RNA methyltransferase RlmN	no	Functional site	yes			3.59976	+			1.38778				3.54794	3.65157			1.49835	1.27721
Q2FZ31_C52	Q2FZ31	FAELVUSNSLR	trmFO	Methylenetetrahydrofolate--tRNA-(uracil-5-)-methyltransferase TrmFO	no		no	3.6311	+	1.56696		0.250839		-0.488522		3.54146	3.72075	1.52321	1.61072	0.287487	0.214192	-0.43159	-0.545455
Q2FWD6_C279	Q2FWD6	VVNNTGQVUTAGTR	SAOUHSC_02363	Putative aldehyde dehydrogenase SAOUHSC_02363	no	Functional site	no	2.72817	+	1.46002		0.743558		0.0262856		2.89672	2.55961	1.44642	1.47363	0.744075	0.743041	0.0102069	0.0423642
Q2G0Q5_C80	Q2G0Q5	TEEULHR	SAOUHSC_00491	2-amino-4-hydroxy-6-hydroxymethyldihydropteridine pyrophosphokinase	yes		no	4.11339	+			0.834838		-0.0708748		4.20414	4.02263			0.80091	0.868766	-0.0475471	-0.0942024
Q2FW19_C43	Q2FW19	IUFRELAYK	rpsZ	30S ribosomal protein S14 type Z	yes	Functional site	no	2.77477	+	1.95145		0.599473		-0.527011		2.96048	2.58906	1.79575	2.10715	0.635396	0.563551	-0.521673	-0.532349
Q2G1C4_C229	Q2G1C4	IDHAFEUVGGK	tarJ'	Ribulose-5-phosphate reductase 2	no		no	3.08013	+	1.77399		0.380099		-0.479628		3.048	3.11227	1.91507	1.63291	0.545079	0.215119	-0.471049	-0.488208
Q2FVV9_C386	Q2FVV9	QVIGTNNVDNUSR	SAOUHSC_02582	Putative formate dehydrogenase SAOUHSC_02582	no		no	3.1027	+	1.55488		0.557238		-0.479667		3.23274	2.97266	1.42664	1.68311	0.558464	0.556012	-0.465082	-0.494251
Q2G037_C225	Q2G037	LVNUETANLNK	whiA	Putative sporulation transcription regulator WhiA	no		no	2.82361	+	1.22954		0.67505		-0.00507849		2.86194	2.78528	0.605968	1.85312	0.825134	0.524966	0.0803848	-0.0905418
Q2G0N0_C82	Q2G0N0	HYAHVDUPGHADYVK	tuf	Elongation factor Tu	yes	Functional site	no	2.39981	+	1.59487		0.688135		-0.0670237		2.51499	2.28463	1.41508	1.77466	0.667454	0.708816	-0.0814954	-0.052552
Q2FZP4_C112	Q2FZP4	TLMAVDSAVMVIDUAK	prfC	Peptide chain release factor 3	no		yes	2.55051		2.06382	+					2.7589	2.34213	1.91299	2.21465
Q2G2A1_C55	Q2G2A1	IIAGGYNGSVAGEVHCIDEGCLIEDGHUIR	SAOUHSC_01692	Uncharacterized protein	no	Functional site	yes			3.51284	+	1.08865		-0.0302558				3.61046	3.41522	1.09099	1.08631	-0.0174901	-0.0430215
Q2FXP2_C202	Q2FXP2	SUNESIIPTSTGAAK	SAOUHSC_01794	Glyceraldehyde-3-phosphate dehydrogenase	no		no	3.51	+	1.08805		0.496197		-0.621486		3.64386	3.37615	0.938474	1.23762	0.521051	0.471344	-0.644645	-0.598326
Q2FWC6_C175	Q2FWC6	VRDEDFEEUDLITIEGSVFGEWLDELRDDHK	SAOUHSC_02372	Uncharacterized protein	no		no	3.79732	+			0.552425		0.119332		3.98914	3.60549			0.66029	0.444561	0.127765	0.110898
Q2FYR0_C129	Q2FYR0	LASUIDVANIDTPIK	SAOUHSC_01375	Uncharacterized protein	no		no	3.65619	+			0.773805		0.0317337		3.81117	3.5012			0.633199	0.914411	-0.160943	0.224411
Q2FXX1_C255	Q2FXX1	QQIUNDAVK	SAOUHSC_01709	Acetyl-CoA carboxylase, biotin carboxylase, putative	no		no	2.77871	+	1.7121		0.712192		-0.750753		2.91538	2.64204	1.41138	2.01282	0.78654	0.637844	-0.715275	-0.786231
Q2G1Z3_C191	Q2G1Z3	LNQEQGUTIVMVLHDINQAIR	SAOUHSC_00652	Iron compound ABC transporter, ATP-binding protein	no		no	3.54763	+	1.63588		0.108842		-0.878638		3.63215	3.4631	1.97739	1.29437	0.222063	-0.004378	-0.872974	-0.884301
Q2G1Z8_C1138	Q2G1Z8	TIPVDDKEVMQIFSTPESLGVTEDEILUK	polC	DNA polymerase III PolC-type	yes		no	4.41293	+							4.48723	4.33864
Q2G0W6_C69	Q2G0W6	VLIEQMAQHUEAFK	SAOUHSC_00408	Uncharacterized protein	no		no	4.39007	+							4.19975	4.58039
Q2G0S3_C379	Q2G0S3	TNIGUGTITVNYDGENK	glmU	Bifunctional protein GlmU	yes	Functional site	no	3.76243	+	1.31473		0.257469		-0.946806		3.92723	3.59763	1.19773	1.43172	0.282274	0.232665	-0.932085	-0.961527
Q2FUR2_C161	Q2FUR2	SEFNDHUASPY	SAOUHSC_03041	Uncharacterized protein	no		no	4.38704	+							4.07724	4.69683
Q2FZJ0_C496	Q2FZJ0	NLIAVGATPLAMTDULNYGSPEK	purL	Phosphoribosylformylglycinamidine synthase subunit PurL	no	Functional site	no	4.38476	+							4.33333	4.4362
Q2FZ60_C5	Q2FZ60	QUFVTGR	rpmB	50S ribosomal protein L28	yes		no	5.43641	+	0.925942		-0.529271		-1.46765		5.70367	5.16914	0.636723	1.21516	-0.403284	-0.655259	-1.25739	-1.67792
Q2FZ04_C199	Q2FZ04	LIEDAINHDGFSFVNVFSPUVTYNK	SAOUHSC_01267	Uncharacterized protein	no		no	2.45007	+	1.72062		0.63763		-0.457547		2.54189	2.35826	1.72526	1.71598	0.719052	0.556209	-0.460687	-0.454407
Q2FVP8_C265	Q2FVP8	LDMHDDUR	SAOUHSC_02654	Ferredoxin--NADP reductase	no		no	4.26937	+							4.27415	4.2646
Q2FWK9_C68	Q2FWK9	LHHMDUYR	SAOUHSC_02280	Uncharacterized protein	yes		no	4.2596	+							4.38474	4.13447
Q2FXA5_C343	Q2FXA5	TSDTDITAUTWTSK	SAOUHSC_01960	Protoporphyrinogen oxidase	no		no	3.15193	+	1.36678		0.46853		-0.732146		3.35292	2.95094	1.82721	0.906352	0.572599	0.36446	-0.399102	-1.06519
Q2FZR4_C49	Q2FZR4	AIENISFDIYKGETLGLVGESGUGK	SAOUHSC_00926	Oligopeptide ABC transporter, ATP-binding protein, putative	no	Functional site	no	3.37796	+	1.29261		0.134457		-0.558969		3.36443	3.39149	1.09707	1.48816	0.109026	0.159887	-0.572094	-0.545845
Q2G038_C196	Q2G038	EADLIVLGPGSLYTSVISNLUVNGISDALIHSDAPK	SAOUHSC_00788	Gluconeogenesis factor	yes		no	2.39581	+	1.76911		0.280265		-0.204468		2.49605	2.29558	1.70783	1.83038	0.217975	0.342555	0.0187766	-0.427712
Q2G0T6_C124	Q2G0T6	AQEYSTVVVDHUFDYFEK	SAOUHSC_00441	Uncharacterized protein	no		no	4.23233	+							3.93234	4.53232
Q2FXX1_C243	Q2FXX1	LIEESPUAALTEER	SAOUHSC_01709	Acetyl-CoA carboxylase, biotin carboxylase, putative	no		no	2.17234	+	1.38999		0.808104		-0.138728		2.30653	2.03814	1.24981	1.53017	0.829444	0.786764	-0.093728	-0.183729
Q2FXU8_C317	Q2FXU8	IPLSQAVIELULSPK	SAOUHSC_01734	Uncharacterized protein	no		no	2.49054	+	1.80952		0.37149		-0.509924		2.64653	2.33454	1.77201	1.84703	0.435202	0.307778	-0.657764	-0.362084
Q2G1T2_C21	Q2G1T2	MDNHNQCNYVNPQNVSLDWEUFIISK	SAOUHSC_00826	Uncharacterized protein	no		no	4.12746	+							4.15478	4.10014
Q2FZT0_C39	Q2FZT0	VNVDDEGVCTVDMTLTSMGUPMGPQIIDQVK	SAOUHSC_00910	Uncharacterized protein	no		no	4.12327	+							4.23496	4.01159
Q2FY10_C245	Q2FY10	IQEELNYFEEIVSEIGUPVIDVSQK	SAOUHSC_01664	Putative pyruvate, phosphate dikinase regulatory protein	no		no	4.23516	+	1.2325		-0.197717		-1.15915		4.33077	4.13955	1.24696	1.21804	-0.113645	-0.28179	-1.14044	-1.17785
Q2FXI8_C126	Q2FXI8	LSVLNVNVGNDTLQIVUGAPNVEAGQK	SAOUHSC_01858	Phenylalanine--tRNA ligase beta subunit	no		no	2.42273	+	1.52527		0.56226		-0.404496		2.54451	2.30094	1.3956	1.65494	0.522437	0.602082	-0.375027	-0.433965
Q2G1C4_C315	Q2G1C4	GHEINVUTMQDIVQAFEMDLSTSWGK	tarJ'	Ribulose-5-phosphate reductase 2	no		no	4.08945	+							4.35565	3.82324
Q2FZV7_C354	Q2FZV7	GTVUSLGSHDGVGMVFGK	SAOUHSC_00878	NADH dehydrogenase-like protein SAOUHSC_00878	no		no	2.37313	+	1.18225		0.822414		-0.299479		2.50116	2.2451	1.03935	1.32516	0.774451	0.870377	-0.332626	-0.266333
Q2FZ17_C152	Q2FZ17	ELTUTEYQMSNGSILSAIK	SAOUHSC_01254	Uncharacterized protein	no		no	4.04617	+							4.24124	3.85111
Q2FZX4_C68	Q2FZX4	TATFMILGAVUTR	lipA	Lipoyl synthase	no	Functional site	no	3.18986	+	1.21403				-0.381075		3.32711	3.05261	1.14574	1.28232			-0.341117	-0.421032
Q2FVG0_C49	Q2FVG0	QIUNLFSPTSGELYFK	SAOUHSC_02754	ABC transporter, ATP-binding protein, putative	no		no	4.01779	+							4.12582	3.90977
Q2FXA3_C55	Q2FXA3	YSLFDITHQPELUAYVTHLPVDNYHTDAAILYK	hemE	Uroporphyrinogen decarboxylase	no		no	3.20123	+	1.56286		-0.216329		-0.532507		3.25462	3.14784	1.56111	1.56462	-0.219472	-0.213186	-0.462137	-0.602876
Q2G2C3_C38	Q2G2C3	VQLDNLTLPSUPLYEEVLDTQMFGLQK	SAOUHSC_01062	UPF0358 protein SAOUHSC_01062	no		no	4.01049	+							4.07528	3.9457
Q2FVQ5_C78	Q2FVQ5	DGTVDUSK	mqo	Probable malate:quinone oxidoreductase	no		no	3.55021	+	1.4305		0.050841		-1.03146		3.71129	3.38912	1.36102	1.49997	0.0794085	0.0222735	-0.988247	-1.07467
Q2FYG6_C136	Q2FYG6	VHQLISESIVDVUR	SAOUHSC_01486	Heptaprenyl diphosphate syntase component II, putative	no		no	2.73853	+	1.21072				0.0209856		2.59366	2.88339	1.03281	1.38863			-0.221304	0.263275
Q2G1X7_C33	Q2G1X7	TAGUDYR	queE	7-carboxy-7-deazaguanine synthase	no	Functional site	no	3.96137	+	0.32262		-0.321691				4.20312	3.71962	0.322505	0.322736	-0.251814	-0.391569
Q2FUT4_C107	Q2FUT4	LHPSFEGQGYAUEAITAITNFVNYIDQETVK	SAOUHSC_03017	Uncharacterized protein	no		no	3.83231	+			0.108924				3.77505	3.88957			-0.0726952	0.290542
Q2G0B0_C183	Q2G0B0	QLGMIUASIPTYK	SAOUHSC_00695	Uncharacterized protein	no		no	3.93201	+							3.65558	4.20844
Q2G1S4_C357	Q2G1S4	ELKUPVIALSQLSR	SAOUHSC_00018	Replicative DNA helicase	yes		no	3.65573	+			0.595212		-0.336666		3.84248	3.46897			0.607579	0.582845	-0.334462	-0.338871
Q2FZC7_C80	Q2FZC7	TTPVVWDMNULEEVCGACSMVINGR	SAOUHSC_01105	Iron-sulphur subunit of succinate dehydrogenase, putative	no		no	3.90617	+							4.16479	3.64754
Q2G1Z4_C439	Q2G1Z4	AQSLIMGUYGIGISR	proS	Proline--tRNA ligase	yes		no	2.29932	+	1.32138		0.647237		-0.37475		2.38918	2.20945	1.51309	1.12968	0.866868	0.427606	-0.130208	-0.619293
Q2FWK2_C298	Q2FWK2	NVANPFGMILSLAMULR	leuB	3-isopropylmalate dehydrogenase	no		no	2.04651	+	1.83687						2.05873	2.03429	2.29772	1.37601
Q2FY55_C52	Q2FY55	QDGTTLVMINSVUGCAGGIAR	SAOUHSC_01610	UPF0403 protein SAOUHSC_01610	no		no	3.87968	+							3.99032	3.76903
Q2FWL2_C302	Q2FWL2	LUTDNAAMIGVAGHYLYQQGR	tsaD	tRNA N6-adenosine threonylcarbamoyltransferase	yes	Functional site	no	3.85069	+							3.93659	3.76479
Q2FZL8_C369	Q2FZL8	AQATLFAGUGIVK	SAOUHSC_00982	Uncharacterized protein	no		no	2.08888	+	1.33569		0.577021		-0.158133		2.24524	1.93253	1.33084	1.34054	0.668032	0.48601	-0.09962	-0.216646
Q2FZ25_C191	Q2FZ25	LNIPIVGIVDTNUDPDEIDYVIPANDDAIR	rpsB	30S ribosomal protein S2	yes		no	2.01727	+	1.74273		0.529743		-0.453021		2.13044	1.9041	1.80469	1.68077	0.522608	0.536878	-0.525524	-0.380519
Q2G2W9_C77	Q2G2W9	IADDKDIDKFNUNER	SAOUHSC_00455	Uncharacterized protein	no		no	3.49841	+					0.321682		3.48813	3.50868					0.255561	0.387804
Q2G1G6_C272	Q2G1G6	VATVMGMUGISK	murQ	N-acetylmuramic acid 6-phosphate etherase	no		no	2.65232	+	1.12614						2.63844	2.66619	1.44015	0.812129
Q2FWP1_C155	Q2FWP1	SGUGFDNDSNK	hlb	Phospholipase C	no		no	4.34479	+	0.469329				-1.03736		4.46761	4.22197	0.48944	0.449218			-0.915609	-1.15911
Q2G0S2_C256	Q2G0S2	EVYACUTHPVLSGPAK	prs	Ribose-phosphate pyrophosphokinase	yes		no	2.20744	+	0.585508		1.0407		-0.119021		2.2806	2.13429	0.395502	0.775514	1.07772	1.00367	-0.214039	-0.024003
Q2FZC7_C238	Q2FZC7	LNALMGTGGLQQCGNSQNCVNAUPK	SAOUHSC_01105	Iron-sulphur subunit of succinate dehydrogenase, putative	no		yes			2.64772	+	0.97547		0.0903092				2.68113	2.61431	1.02191	0.929033	0.0877344	0.092884
Q2FZC7_C234	Q2FZC7	LNALMGTGGLQQCGNSQNUVNACPK	SAOUHSC_01105	Iron-sulphur subunit of succinate dehydrogenase, putative	no		no	3.75657	+					-0.072609		3.97435	3.53879					-0.238102	0.092884
Q2G2W9_C203	Q2G2W9	LMUCLKYENDYYEEVR	SAOUHSC_00455	Uncharacterized protein	no		no	3.676	+							3.80271	3.5493
Q2FUV4_C147	Q2FUV4	NEGVSESUHGGIK	SAOUHSC_02997	Uncharacterized protein	no		no	3.66705	+							3.8506	3.48349
Q2FYJ1_C276	Q2FYJ1	MSFATTLNHILSIUNEHELHVSGK	SAOUHSC_01454	Uncharacterized protein	no		no	3.64711	+							3.44692	3.8473
Q2G0N1_C473	Q2G0N1	EFNVEUNVGAPMVSYR	fusA	Elongation factor G	yes		no	2.51423	+	1.3648		0.066949		-0.323477		2.66885	2.35961	1.43912	1.29048	0.140812	-0.00691414	-0.226848	-0.420105
Q2G069_C224	Q2G069	QPLEYPSUGSVFQRPPGHFAGK	murB	UDP-N-acetylenolpyruvoylglucosamine reductase	yes	Functional site	no	2.38132	+	1.1098		0.650097		-0.524791		2.47738	2.28526	0.926409	1.29319	0.710525	0.589668	-0.493108	-0.556475
Q2FXN4_C117	Q2FXN4	QELDLFTULR	SAOUHSC_01801	Isocitrate dehydrogenase [NADP]	no		no	2.40698	+	1.45579		0.191024		-0.453698		2.28084	2.53312	1.55584	1.35573	0.217719	0.16433	-0.456759	-0.450636
Q2FUT8_C29	Q2FUT8	DIUQEVK	hisD	Histidinol dehydrogenase	no		no	2.32956	+	1.23228		0.504845		-0.490065		2.35583	2.30328	1.04523	1.41932	0.489646	0.520045	-0.526888	-0.453241
O06446_C775	O06446	DYQNEGHELFDIMMQNIEEDTUK	secA1	Protein translocase subunit SecA 1	yes		no	2.40501	+	1.04635		0.123788				2.37835	2.43168	1.13448	0.958213	0.388465	-0.140889
Q2FZZ6_C291	Q2FZZ6	STDLEAMKFDDYMYSWDUS	SAOUHSC_00838	Uncharacterized protein	no		no	3.57402	+							3.69098	3.45707
Q2G0L9_C109	Q2G0L9	GGUSGSLMNLLQQSNFNHR	tadA	tRNA-specific adenosine deaminase	no		no	3.55976	+							3.50407	3.61545
Q2FZJ1_C188	Q2FZJ1	GNVUGMMPHPER	purQ	Phosphoribosylformylglycinamidine synthase subunit PurQ	no	Functional site	no	2.22524	+	1.33419						2.37217	2.0783	1.3293	1.33908
Q2G1K4_C160	Q2G1K4	SEQTLIUGTR	SAOUHSC_00118	Capsular polysaccharide biosynthesis protein Cap5E, putative	no		no	3.53894	+							3.60656	3.47132
Q53727_C243	Q53727	NLUVVGDSDQSIYGWR	pcrA	ATP-dependent DNA helicase PcrA	yes		no	3.31803	+			0.205662				3.49685	3.13922			0.188148	0.223175
Q2FWE2_C131	Q2FWE2	LGYLURK	SAOUHSC_02357	Threonylcarbamoyl-AMP synthase	yes		no	3.51085	+							3.30273	3.71896
Q2G0D6_C190	Q2G0D6	DIYESMEEIADKUQIVANNFETIIMK	SAOUHSC_00669	Uncharacterized protein	no		no	3.08907	+	0.866848		-0.45035				3.20117	2.97696	0.957172	0.776525	-0.499483	-0.401216
Q2FZT1_C82	Q2FZT1	TUHEILDLGIAQNIIQGLQQYQVSNIIAEVK	SAOUHSC_00909	Uncharacterized protein	no		no	2.16551	+	1.30848		0.459445		-0.431696		2.25592	2.07509	1.22113	1.39583	0.443182	0.475707	-0.372673	-0.49072
Q2G268_C154	Q2G268	EDGYHFIEPGSGFLAUGYVAK	SAOUHSC_01178	Coenzyme A biosynthesis bifunctional protein CoaBC	yes		no	3.53558	+	1.09291		-0.544345		-0.605597		3.55287	3.51828	1.16275	1.02307	-0.50822	-0.580471	-0.585179	-0.626014
Q2G0G5_C123	Q2G0G5	VILVGGDUPK	SAOUHSC_00604	Uncharacterized protein	no		no	3.27537	+	0.943404		-0.0649394		-0.677445		3.3598	3.19093	0.929488	0.95732	-0.019726	-0.110153	-0.652516	-0.702374
Q2FWM2_C42	Q2FWM2	QIGGAPCNVAUTVQK	SAOUHSC_02267	Fructokinase, putative	no		yes			3.56533	+	0.45848		-0.578765				3.36247	3.76818	0.507921	0.409038	-0.671485	-0.486044
Q2FZL1_C30	Q2FZL1	MNNLDDUVNLTIGQPDFPMPDVVK	SAOUHSC_00989	Aminotransferase	no		no	3.42737	+							3.47087	3.38388
Q2G0Y9_C76	Q2G0Y9	ILTIEASGIAPAIMAALHFDVPULFAK	xpt	Xanthine phosphoribosyltransferase	no		no	3.22597	+	0.896469		-0.0180232		-0.677342		3.32639	3.12555	0.861558	0.93138	0.0301242	-0.0661706	-0.663511	-0.691173
Q2FZK7_C230	Q2FZK7	YKPQVNSSINDYIUK	atl	Bifunctional autolysin	no		no	3.36948	+	0.492567		0.113984		-0.557565		3.42546	3.31349	0.374622	0.610511	0.144177	0.083792	-0.492221	-0.62291
Q2G1H9_C1906	Q2G1H9	TITHIDUMPLTTNDKVDTTR	SAOUHSC_00144	Uncharacterized protein	no		no	3.41117	+							3.42962	3.39273
Q2FXT6_C150	Q2FXT6	SMQIQNDLGSDIMMAFDEUPPMPAEYDYVK	tgt	Queuine tRNA-ribosyltransferase	no	Functional site	no	3.40189	+							3.31467	3.48911
Q2FWG7_C213	Q2FWG7	QFFTEWNUHD	SAOUHSC_02324	Uncharacterized protein	no		no	3.40008	+							3.63935	3.16081
Q2G282_C145	Q2G282	MEIYGVCKEUQDK	perR	Peroxide-responsive repressor PerR	no	Functional site	no	2.42872	+	1.74672				-0.792536		2.388	2.46944	1.9568	1.53665			-1.15949	-0.425579
Q2FXH9_C466	Q2FXH9	KQLFNATSIYLEAIYSLUVEE	SAOUHSC_01868	Putative dipeptidase SAOUHSC_01868	no		yes			0.965448		2.39853	+					0.858379	1.07252	2.52035	2.27671
Q2G1B9_C38	Q2G1B9	PLYMSIUAADQR	tarJ	Ribulose-5-phosphate reductase 1	yes	Functional site	yes			2.29183	+	0.538584		0.484721				2.43555	2.14812	0.542109	0.535058	0.427928	0.541515
Q2FZZ2_C208	Q2FZZ2	IUDEVAVMESGK	metN2	Methionine import ATP-binding protein MetN 2	no		no	2.44384	+	0.860521						2.54957	2.33811	0.747608	0.973435
Q2G1Z8_C1254	Q2G1Z8	GLTEEMIETMKENEVPDWYLDSULK	polC	DNA polymerase III PolC-type	yes		no	3.30369	+							3.43603	3.17135
P0A0M9_C108	P0A0M9	DEGFYVATMNAQUHAIPFYESLNFK	SAOUHSC_00995	Putative acetyltransferase SAOUHSC_00995	no		no	3.27454	+							3.40177	3.14732
Q2G2H4_C177	Q2G2H4	PVLTGVNWLIQENELIUTATDSHR	SAOUHSC_00002	Beta sliding clamp	yes		no	2.3168	+	0.958229		0.317012		-0.32423		2.43763	2.19598	1.22823	0.688225	0.272143	0.361881	-0.165645	-0.482815
Q2FZW0_C217	Q2FZW0	IYNUDEPKDIDLVVWTAGIQPVEVVR	SAOUHSC_00875	Uncharacterized protein	no		no	3.24749	+							3.37072	3.12426
Q2G1S3_C179	Q2G1S3	GMFNETUPSFDDIFEEYYAAGQR	purA	Adenylosuccinate synthetase	no		no	2.80722	+	0.624542		-0.240594				2.91955	2.69488	0.701239	0.547845	-0.120216	-0.360972
Q2FY71_C19	Q2FY71	SGISLSELGLGUMSLGTDLK	SAOUHSC_01594	Uncharacterized protein	no		no	2.43927	+	0.87764		0.337695		-0.474422		2.54244	2.3361	0.777451	0.977829	0.494452	0.180937	-0.584999	-0.363846
Q2G2W9_C89	Q2G2W9	DAENALILUK	SAOUHSC_00455	Uncharacterized protein	no		no	2.70072	+			0.686943		-0.231124		2.72965	2.67178			0.78902	0.584866	0.0167816	-0.47903
Q2FVS1_C194	Q2FVS1	KSDUMFPEDTWK	SAOUHSC_02621	Putative 3-methyladenine DNA glycosylase	no		no	3.13847	+							3.11387	3.16306
Q2FVI3_C170	Q2FVI3	KUIYVQPHSYTIENQQQNK	SAOUHSC_02727	Uncharacterized protein	no		no	3.13426	+							3.26473	3.00378
Q2FUV7_C116	Q2FUV7	GAQHALNLLGLATLSLLDTFSUNKK	SAOUHSC_02994	Uncharacterized protein	no		no	3.11637	+							3.03182	3.20091
Q2G292_C129	Q2G292	VLNGUHLGGGLHHAQPGR	SAOUHSC_01849	Uncharacterized protein	no		no	3.11441	+							2.9617	3.26712
Q2FZ72_C1033	Q2FZ72	TTVENGIPULTSLDTANALTNVIESMTFTMR	carB	Carbamoyl-phosphate synthase large chain	no		no	2.61841	+	0.483348						2.76106	2.47577	0.291604	0.675093
Q2FWY3_C46	Q2FWY3	GTYDIUKPLTIYGNTTLLLDNETILR	SAOUHSC_02138	Uncharacterized protein	no		no	3.58017	+					-0.496247		3.65992	3.50042					-0.335299	-0.657195
Q2FYS9_C443	Q2FYS9	TGDIAIAAITSUTNTSNPYVMLGAGLVAK	SAOUHSC_01347	Aconitate hydratase	no		no	2.16556	+	1.21922		0.0798488		-0.38305		2.24285	2.08828	1.17836	1.26009	0.0989585	0.0607392	-0.382532	-0.383567
Q2FZC6_C184	Q2FZC6	NSESDTVILGUTHYPLLYKPIYDYFGGK	murI	Glutamate racemase	yes	Functional site	no	3.00453	+			0.362515		-0.319162		3.21009	2.79897			0.392421	0.332609	-0.333598	-0.304725
Q2FXW5_C341	Q2FXW5	KSPFDFUGLVLDYNEDTK	SAOUHSC_01716	Uncharacterized protein	no		no	2.09817	+	1.12776		0.34814		-0.53152		2.23398	1.96236	1.18808	1.06743	0.443501	0.252779	-0.471209	-0.591832
P0A0Q0_C222	P0A0Q0	VGKEDFTSFUQLNELTAVVMDYEDEEKVETIK	lacR	Lactose phosphotransferase system repressor	no		no	3.02138	+							3.05495	2.98781
Q2FZZ4_C31	Q2FZZ4	VQQVIAEPVNIIUTHGTMSIDKLDDMIESLYDK	SAOUHSC_00840	Uncharacterized protein	no		no	3.01445	+							3.2358	2.79311
Q2FYZ9_C87	Q2FYZ9	VAIUEQMEDPK	mutS	DNA mismatch repair protein MutS	no		no	2.46374	+			0.516673				2.46918	2.4583			0.903732	0.129613
Q2G067_C133	Q2G067	FIGLUNQSIK	SAOUHSC_00754	Uncharacterized protein	no		no	2.88081	+	0.484058		0.0434621		-0.465207		3.06774	2.69388	0.393965	0.57415	-0.0814611	0.168385	-0.524064	-0.40635
Q2FZC6_C143	Q2FZC6	INPHVEVHGVAUPGFVPLVEQMR	murI	Glutamate racemase	yes		no	2.94285	+							3.08782	2.79788
Q2FXR4_C143	Q2FXR4	FEGUYHGHSDSLLIK	hemL1	Glutamate-1-semialdehyde 2,1-aminomutase 1	no		no	2.59114	+	0.685279		0.0386516		-0.377469		2.73712	2.44516	0.610935	0.759623	0.0288939	0.0484093	-0.342431	-0.412506
Q2FXV6_C199	Q2FXV6	DSTGIUFIGEK	mnmA	tRNA-specific 2-thiouridylase MnmA	yes	Functional site	no	2.86225	+	1.55143		-0.295709		-1.23219		2.90859	2.8159	1.48586	1.617	-0.270889	-0.320529	-1.22313	-1.24126
Q2FY32_C136	Q2FY32	QLNDLYUSR	aroK	Shikimate kinase	no	Functional site	yes			2.13081	+	0.761498		-0.0703362				2.20833	2.05329	0.762476	0.760519	-0.106482	-0.0341899
Q2FXA5_C451	Q2FXA5	VTGASFEAVGLPDUITQGK	SAOUHSC_01960	Protoporphyrinogen oxidase	no		no	2.21789	+	0.620237		0.427927		-0.475136		2.36107	2.07471	0.371392	0.869082	0.528971	0.326882	-0.439794	-0.510478
Q93T05_C615	Q93T05	LREDVAIMMSUK	mutL	DNA mismatch repair protein MutL	no		no	2.78735	+							2.66034	2.91437
Q2G1K4_C121	Q2G1K4	VIULSTDK	SAOUHSC_00118	Capsular polysaccharide biosynthesis protein Cap5E, putative	no		no	2.69796	+							2.89128	2.50465
Q2G2S8_C955	Q2G2S8	SLSEHYQVLYFTUVK	SAOUHSC_01974	Uncharacterized protein	no		no	2.65654	+							2.80507	2.50802
Q2FWZ6_C155	Q2FWZ6	AUAMITFR	SAOUHSC_02110	Uncharacterized protein	no		no	2.64731	+							2.76564	2.52897
Q2G0S8_C196	Q2G0S8	MUYEALENR	SAOUHSC_00466	Putative 4-diphosphocytidyl-2-C-methyl-D-erythritol kinase	no		no	2.64452	+							2.4993	2.78975
Q2G293_C182	Q2G293	LMATGGLEIFATDDPEITSHPANULMAR	SAOUHSC_01847	Uncharacterized protein	no		no	2.61935	+							2.73062	2.50807
Q2FY04_C100	Q2FY04	ELUDDDMPVYMTNHK	SAOUHSC_01670	Cytidine deaminase	no		no	2.59625	+							2.48373	2.70878
Q2G1R8_C31	Q2G1R8	MMEEGKDUK	SAOUHSC_00034	Uncharacterized protein	no		no	2.58717	+							2.57517	2.59917
Q2G0S8_C147	Q2G0S8	TALUTGR	SAOUHSC_00466	Putative 4-diphosphocytidyl-2-C-methyl-D-erythritol kinase	no		no	2.23658	+	0.950763		0.15142		-0.772782		2.33296	2.14021	1.0106	0.890929	0.0375477	0.265292	-0.857511	-0.688053
Q2FZ14_C210	Q2FZ14	LVLPSEVAHTUAYLYHPNAR	SAOUHSC_01257	Uncharacterized protein	no		no	2.55615	+							2.42838	2.68392
Q2G0I1_C78	Q2G0I1	QAUDNFVSR	SAOUHSC_00584	Uncharacterized protein	no		no	2.72649	+			-0.175032				2.82603	2.62695			-0.238119	-0.111945
Q2G2V4_C30	Q2G2V4	FYPTUSEYTR	SAOUHSC_01914	Putative membrane protein insertion efficiency factor	no		no	2.2143	+	0.445922		0.138815		-0.260494		2.3427	2.0859	0.690462	0.201383	0.115033	0.162597	0.0629506	-0.583939
Q2FXY7_C383	Q2FXY7	EFGIELIATAPSVIYQUVLR	lepA	Elongation factor 4	no		no	2.54984	+	1.08281		-0.183353		-0.950665		2.67102	2.42865	1.21126	0.95435	-0.144858	-0.221848	-0.918033	-0.983297
Q2FWW9_C187	Q2FWW9	LEDIELIUDR	SAOUHSC_02152	ABC transporter, ATP-binding protein, putative	yes		no	2.30803	+	0.520015		0.116165		-0.468715		2.41339	2.20266	0.306009	0.734021	0.153347	0.0789834	-0.414904	-0.522525
O05154_C173	O05154	FAELQUDETLANTYNHAILVK	tagX	Putative glycosyltransferase TagX	no		no	2.62366	+	1.11791		-0.644832		-0.627518		2.69381	2.55351	1.00956	1.22626	-0.620268	-0.669396	-0.58775	-0.667286
Q2FZD3_C378	Q2FZD3	NVYUDIGDEQSIEQSLSTFSSHMTNIVEILK	mutS2	Endonuclease MutS2	no		no	2.42289	+							2.38869	2.4571
Q2G1T3_C120	Q2G1T3	YLQMAHEFUPYSK	SAOUHSC_00831	Organic hydroperoxide resistance protein-like	no		no	2.40932	+							2.52947	2.28917
Q2G1K6_C58	Q2G1K6	SULNHIESLEEVQALNLK	SAOUHSC_00116	Capsular polysaccharide synthesis enzyme Cap8C	no		no	2.40802	+							2.46913	2.3469
Q2G1J5_C159	Q2G1J5	VAIVRPPMIYGAHUPGNFQR	SAOUHSC_00127	Cap5N protein/UDP-glucose 4-epimerase, putative	no		no	2.40777	+							2.42978	2.38576
Q2G089_C246	Q2G089	QFMGSHLEDDAPUVEENAIIR	SAOUHSC_00731	ABC transporter domain protein	no		no	2.39059	+							2.52825	2.25293
Q2G089_C207	Q2G089	IULLNEGHIEQIDTPEGFK	SAOUHSC_00731	ABC transporter domain protein	no		no	2.77466	+					-0.403423		2.92654	2.62278					-0.271931	-0.534914
Q2G0J8_C110	Q2G0J8	AGEVYEASNAQYFVVDPVMVUK	SAOUHSC_00562	Phosphomethylpyrimidine kinase	no		no	2.36962	+							2.55343	2.1858
Q2G0G1_C145	Q2G0G1	VPEKLDPAAASSITUAGVTTYK	adh	Alcohol dehydrogenase	no	Functional site	yes			2.08778	+	0.686782		-0.40527				1.99751	2.17805	0.692159	0.681404	-0.404611	-0.405929
Q2FYZ9_C541	Q2FYZ9	IISELDULQSFAEIAQK	mutS	DNA mismatch repair protein MutS	no		no	2.37653	+	1.25646		-0.248641		-1.05516		2.53648	2.21658	1.32579	1.18713	-0.1435	-0.353782	-1.30194	-0.808387
Q2G1U8_C227	Q2G1U8	DKQGNAVFISHESIGYLADUYGFVQK	SAOUHSC_02690	Uncharacterized protein	no		no	2.32148	+							2.4479	2.19506
Q2FVT7_C193	Q2FVT7	GVGGHAAKPEQUNDPVIVLAQLINSIQSIVSR	SAOUHSC_02605	Uncharacterized protein	no		no	2.48031	+			0.237551		-0.408098		2.67123	2.28939			0.0539454	0.421156	-0.385356	-0.430839
Q2FY73_C140	Q2FY73	LTFHGVUETCQAK	SAOUHSC_01592	Transcriptional regulator, Fur, putative	yes		no	2.46267	+	1.06041		-0.319715		-0.898039		2.60274	2.32259	1.12473	0.996099	-0.207111	-0.432318	-0.855405	-0.940672
Q2FVS1_C142	Q2FVS1	AIDGATLNDUR	SAOUHSC_02621	Putative 3-methyladenine DNA glycosylase	no		no	2.24468	+			0.39873		-0.353491		2.19661	2.29275			0.335826	0.461633	-0.262642	-0.444341
Q2FXK3_C127	Q2FXK3	LITIADNNUMISNAVR	SAOUHSC_01831	Uncharacterized protein	no		no	2.28145	+							2.40411	2.15879
Q2FYK5_C201	Q2FYK5	HIVSAWNPTEIDTMALPPUHTMFQFYVQDGK	thyA	Thymidylate synthase	yes	Functional site	no	2.24567	+							2.27302	2.21831
Q2G274_C421	Q2G274	LADUSSK	gyrB	DNA gyrase subunit B	yes		no	2.66467	+	0.800188		-0.0610758		-1.17093		2.83805	2.4913	0.627906	0.97247	-0.0535849	-0.0685667	-1.06714	-1.27471
Q2FWK4_C199	Q2FWK4	AGVIETTFKEETETDLFGEQAVLUGGVSK	ilvC	Ketol-acid reductoisomerase (NADP(+))	no	Functional site	no	2.56247	+			0.145017		-0.475031		2.6854	2.43954			0.292546	-0.00251248	-0.416423	-0.533639
Q2G1F0_C228	Q2G1F0	EIYDAPNUIFVAQFIGSPAMNMLNATVEMDGLK	SAOUHSC_00175	Multiple sugar-binding transport ATP-binding protein, putative	no		no	2.23024	+							2.34832	2.11217
Q2FXY3_C73	Q2FXY3	LTMIQMIIDELGFGDIUDDEIKR	nadD	Probable nicotinate-nucleotide adenylyltransferase	yes		no	2.09044	+							2.13527	2.04562
Q2FXT4_C269	Q2FXT4	MMNUIIK	ruvB	Holliday junction ATP-dependent DNA helicase RuvB	yes		no	2.04007	+							1.90801	2.17214
Q2G0J7_C214	Q2G0J7	SPINWUESEA	ung	Uracil-DNA glycosylase	no		no	2.01624	+							1.96492	2.06757
Q2G2R6_C14	Q2G2R6	FKVNENETIADULSR	SAOUHSC_02130	Uncharacterized protein	no		no	2.03347	+	0.155593		0.49042		-0.693644		2.18758	1.87935	-0.0258966	0.337083	0.469573	0.511266	-0.693528	-0.693761
Q2FY27_C180	Q2FY27	FKCNUGR	SAOUHSC_01646	Glucokinase, putative	no		yes	1.25305		2.05949	+	-0.457401		-1.12504		1.40163	1.10447	1.96628	2.1527	-0.403523	-0.511279	-1.00101	-1.24907
Q2G081_C57	Q2G081	FNCPEFTSLUPITGQPDFATIYISYIPNVK	queF	NADPH-dependent 7-cyano-7-deazaguanine reductase	no	Functional site	yes			2.23565	+	-0.132399		-0.377975				2.20292	2.26837	-0.10479	-0.160008	-0.298318	-0.457633
Q2FZY3_C302	Q2FZY3	YPNUVLLGEGAK	SAOUHSC_00851	UPF0051 protein SAOUHSC_00851	yes		no	2.06381	+	0.171472		-0.266222		-0.283074		2.20543	1.92218	0.0304403	0.312504	-0.257705	-0.27474	-0.302185	-0.263962
Q2FZD2_C29	Q2FZD2	VESGVQLVDFWATWUGPCK	trxA	Thioredoxin	yes		no	2.46801	+	1.5206		-0.665359		-1.66589		2.41524	2.52077	1.34716	1.69404	-0.603883	-0.726835	-1.64673	-1.68505
P95689_C102	P95689	MTGILUR	serS	Serine--tRNA ligase	yes		no	2.13491	+	1.02976		-0.420857		-1.24686		2.26805	2.00177	0.78266	1.27685	-0.458862	-0.382852	-1.12117	-1.37254
Q93T05_C646	Q93T05	EAEDPFTUPHGRPIIINFSK	mutL	DNA mismatch repair protein MutL	no		no	2.33056	+					-1.00901		2.28596	2.37516					-0.310057	-1.70797
Q2FXQ7_C13	Q2FXQ7	FKFNEDEENLKUSFCGK	clpX	ATP-dependent Clp protease ATP-binding subunit ClpX	no		no	2.13659	+			-0.195073		-0.856305		2.16015	2.11303			-0.43335	0.0432045	-0.768993	-0.943617
Q2FXI8_C167	Q2FXI8	GVASSGMIUSMK	SAOUHSC_01858	Phenylalanine--tRNA ligase beta subunit	no		no	2.0916	+	-2.26133						2.22452	1.95868	-1.78493	-2.73774
Q2G274_C429	Q2G274	SPEEUEIFLVEGDSAGGSTK	gyrB	DNA gyrase subunit B	yes		no	2.15977	+	0.456795		-0.849826		-2.12091		2.30276	2.01678	0.345169	0.568421	-0.784972	-0.91468	-1.97262	-2.2692
Q2G0I3_C25	Q2G0I3	FNSSSLAELTULNPVQLR	SAOUHSC_00582	Uncharacterized protein	no		no	2.65403	+	0.193484		-1.38685		-1.87159		2.62326	2.6848	0.0253123	0.361656	-1.29612	-1.47758	-1.91409	-1.8291
Q2FZH4_C12	Q2FZH4	SEIIVYTQNDUPPCTFVK	SAOUHSC_01030	Uncharacterized protein	no		yes			2.06906	+	-1.49785		-2.07481				2.19532	1.9428	-1.4024	-1.59331	-1.74227	-2.40736
Q2FYZ0_C36	Q2FYZ0	GDVMLIVNTASEUGFTSQFEGLQSLYEK	SAOUHSC_01282	Glutathione peroxidase	no	Functional site	no	2.6459	+	-0.519891		-1.57493		-2.62245		2.691	2.6008	-0.543682	-0.496099	-1.38627	-1.76359	-2.60512	-2.63978
Q2FZZ9_C10	Q2FZZ9	NUTTCKK	SAOUHSC_00835	Uncharacterized protein	no		no	2.69298	+	0.0941534		-2.543		-3.06016		2.83287	2.55309	0.211137	-0.02283	-2.39828	-2.68771	-2.98564	-3.13467
Q2FZZ9_C13	Q2FZZ9	NCTTUKK	SAOUHSC_00835	Uncharacterized protein	no		no	2.69298	+	-2.23458		-3.63407				2.83287	2.55309	-2.54962	-1.91953	-3.79356	-3.47459
Q2FYK4_C144	Q2FYK4	DAFDENUK	SAOUHSC_01436	UPF0403 protein SAOUHSC_01436	no		no	2.00346	+	-0.777967		-1.96114		-2.94893		2.12619	1.88073	-0.962154	-0.593779	-1.91466	-2.00761	-2.90912	-2.98873
Q2G1I7_C143	Q2G1I7	CIULYNAPDEEAVR	SAOUHSC_00135	Uncharacterized protein	no		no			2.25452		2.32594		2.89621		2.01111		2.037	2.47205	2.55508	2.0968	3.13847	2.65395
A0A0H3KE27_C28	A0A0H3KE27	KUEKYTDEVIR	rsbU	sigma factor sigB regulation protein	no		no	4.86308		1.58093		0.665008		-0.0681374		5.29013	4.43603	1.44334	1.71853	0.72718	0.602837	-0.277184	0.14091
Q2G097_C26	Q2G097	IKUSSER	SAOUHSC_00724	Chorismate binding enzyme, putative	no		no	3.67921				1.84568		1.34697		4.26574	3.09268			1.67179	2.01956	1.45796	1.23597
Q2G124_C378	Q2G124	VLVTLLHQLNDEVETGLTSLUIGGGQAIAAVVSK	SAOUHSC_00336	Probable acetyl-CoA acyltransferase	yes	Functional site	no	1.251		3.19391		1.46104		0.166066		1.39177	1.11023	2.93023	3.45759	1.4918	1.43029	0.215368	0.116764
Q2FXG1_C267	Q2FXG1	CDUGAQLESSMK	ribBA	Riboflavin biosynthesis protein RibBA	no	Functional site	no			3.71855		1.53126		0.740394				3.38598	4.05111	1.35862	1.7039	0.153676	1.32711
Q2FVT8_C35	Q2FVT8	QEQEVPGLQSEMTPAPDUGETSYQGHQR	SAOUHSC_02604	Uncharacterized protein	no		no	2.49629		1.93029		1.24603		0.296148		2.73808	2.25451	1.85823	2.00235	1.31889	1.17316	0.370653	0.221643
Q2FWD1_C382	Q2FWD1	ENNVPFFGIULGMQLATVEFSR	pyrG	CTP synthase	yes	Functional site	no	2.28139		1.8091		0.797343		0.937814		2.64002	1.92277	1.75847	1.85973	0.794853	0.799833	0.930245	0.945383
Q2FXZ2_C15	Q2FXZ2	IIGIDLGTTNSUVTVLEGDEPK	dnaK	Chaperone protein DnaK	yes		no	2.47773		1.51441		1.07013		0.599334		2.7608	2.19466	1.35269	1.67613	1.07975	1.0605	0.659622	0.539045
Q2FZR9_C165	Q2FZR9	GPNGATVTAUATGTNSIGEAFK	SAOUHSC_00921	3-oxoacyl-[acyl-carrier-protein] synthase 2	yes	Functional site	no	3.41166		0.44994		1.11391		0.283008		3.96486	2.85846	0.279293	0.620586	1.08651	1.1413	0.25882	0.307195
Q2G242_C260	Q2G242	VUHVHGIK	SAOUHSC_00508	Uncharacterized protein	no		no	2.93138		2.15538		0.364711		-0.260915		3.24096	2.62181	1.83762	2.47314	0.638027	0.0913952	-0.467693	-0.0541376
Q2FXF5_C89	Q2FXF5	NSNLVVTLCSDADVNUPSLPTNVK	arsC	Arsenate reductase	no	Functional site	no			3.34033		1.67785		0.135438				2.96203	3.71864	1.71928	1.63642	0.0587114	0.212165
Q2FY19_C106	Q2FY19	VIDYUPIDQIK	fur	Ferric uptake regulation protein	no	Functional site	no	1.98469		1.48794		1.23827		0.343795		2.16806	1.80132	1.40212	1.57376	1.19043	1.28611	0.362778	0.324811
Q2G1N2_C259	Q2G1N2	VVVDDWSQUNR	SAOUHSC_00076	Ornithine cyclodeaminase, putative	no		no	3.6462				1.02741		0.208781		3.34483	3.94757			1.07553	0.979294	0.378845	0.0387171
Q2G2W8_C82	Q2G2W8	DNLAILYGEGFHIUK	SAOUHSC_00456	Initiation-control protein YabA	no		no	1.05967		2.95758		1.38188		-0.538499		1.44841	0.670929	2.69475	3.22041	1.37562	1.38813	-0.548418	-0.528579
Q2FY04_C89	Q2FY04	ASLVSAISQGYRPGDFESITVTVDADKPSSPUGACR	SAOUHSC_01670	Cytidine deaminase	no		no	1.65694		2.33506		0.763069				2.31504	0.998845	1.99632	2.67381	0.644318	0.881821
Q2FV20_C206	Q2FV20	QLLLDGUR	SAOUHSC_02920	2-dehydropantoate 2-reductase	no		no	2.32187		1.7234		0.818654		-0.154904		1.76541	2.87833	1.60673	1.84008	0.968644	0.668664	-0.0372659	-0.272541
Q2FZC6_C72	Q2FZC6	MLVIAUNTATAVALEYLQK	murI	Glutamate racemase	yes	Functional site	no	3.10806		1.7382		0.308999		-0.451067		3.42492	2.79119	1.91158	1.56482	0.376402	0.241596	-0.325937	-0.576196
Q2FVN9_C139	Q2FVN9	KUANEEER	SAOUHSC_02663	Uncharacterized protein	no		no	2.0424				1.42162		1.15781		2.24126	1.84354			1.48063	1.36261	1.18206	1.13356
Q2G0M6_C394	Q2G0M6	SVLSDSNLTGUIFGLTLQTK	araB	Ribulokinase	no		no	1.76185		1.66149		0.96783				1.80591	1.71778	1.19415	2.12882	1.14281	0.792855
Q2FZ17_C141	Q2FZ17	TADGEPVVYULDK	SAOUHSC_01254	Uncharacterized protein	no		no	2.15761		1.54659		1.00785		-0.377205		2.58532	1.7299	1.42943	1.66375	0.970265	1.04544	-0.470849	-0.283562
Q2FV14_C446	Q2FV14	EUAVVAK	SAOUHSC_02929	Acetyl-CoA synthetase, putative	no		no	1.32656		1.82323		1.09872		0.0602793		1.43649	1.21663	1.70876	1.93769	1.08172	1.11572	0.0537864	0.0667723
Q2G1Z3_C40	Q2G1Z3	VTSIIGPNGUGK	SAOUHSC_00652	Iron compound ABC transporter, ATP-binding protein	no	Functional site	no	4.25916								3.8498	4.66852
Q2FY46_C123	Q2FY46	LTEEGUFDK	xseA	Exodeoxyribonuclease 7 large subunit	no		no	1.99346		1.57409		0.821672		-0.178764		2.08093	1.906	1.46985	1.67834	0.629846	1.0135	-0.174369	-0.183158
Q2FWD2_C29	Q2FWD2	QSLEIQMAAQULIQAIGGEGYVYVK	SAOUHSC_02367	Uncharacterized protein	no		no	1.69614		1.53458		1.12755		-0.161234		1.78333	1.60895	1.62279	1.44636	1.10943	1.14568	-0.209228	-0.113239
Q2FWY9_C186	Q2FWY9	QPAAYUGVVGMK	gatA	Glutamyl-tRNA(Gln) amidotransferase subunit A	yes		no	2.04239		1.53732		0.887672		-0.288369		2.27166	1.81313	1.32815	1.74648	0.882447	0.892896	-0.26913	-0.307609
Q2FV75_C78	Q2FV75	GDNPEITIPLKPTGSHFQQUVWNELR	SAOUHSC_02861	Methylated-DNA--protein-cysteine methyltransferase	no		no	2.44814		1.72434						2.69704	2.19925	1.6564	1.79227
Q2FY04_C54	Q2FY04	TFYGTNVENASYPLSIUAER	SAOUHSC_01670	Cytidine deaminase	no		no	1.96196		1.10872		0.851153		0.0700064		2.13077	1.79315	1.03787	1.17957	0.839557	0.862749	0.00460925	0.135404
Q53726_C121	Q53726	TYGHSIDFEEVIFEGYVVUNADSK	pcrB	Heptaprenylglyceryl phosphate synthase	no		no	1.22493		1.71836		0.85069		0.165313		1.29101	1.15885	1.55439	1.88233	0.824971	0.876409	0.064469	0.266157
O05204_C127	O05204	LEGSFHFETFISLTUQK	ahpF	Alkyl hydroperoxide reductase subunit F	no		no	1.97577						1.95864		2.07252	1.87901		2.28904	2.77124		2.54523	1.37206
Q2G1K9_C844	Q2G1K9	MAELAFEDQUTTANPK	SAOUHSC_00113	Aldehyde-alcohol dehydrogenase	no		no	3.92959								4.61689	3.2423
Q2FXU4_C208	Q2FXU4	ILDUKVDR	hisS	Histidine--tRNA ligase	yes		no	1.73589		1.32667		0.769695		0.0960237		1.9978	1.47398	1.17718	1.47616	0.765722	0.773668	0.152224	0.0398239
Q2FYV3_C82	Q2FYV3	IVIUASTGNTSASAAAYAAR	SAOUHSC_01321	Threonine synthase	no	Functional site	no	0.982447		1.80075		0.54533		0.529106		1.17696	0.787934	1.57739	2.02411	0.482229	0.608431	0.547351	0.510861
Q2G0T5_C190	Q2G0T5	FVADAQQIEUEDEALAFIAK	dnaX	DNA polymerase III subunit gamma/tau	yes		no	2.20004		1.57607		0.4938		-0.435555		2.61854	1.78153	1.52271	1.62943	0.512051	0.475549	-0.312677	-0.558433
Q2G122_C715	Q2G122	SLFWVNPDUGLK	metE	5-methyltetrahydropteroyltriglutamate--homocysteine methyltransferase	no	Functional site	no	1.93276		1.7533		0.32431		-0.186215		2.14476	1.72076	1.66757	1.83903	0.341075	0.307545	-0.313656	-0.0587735
Q2FZ66_C120	Q2FZ66	HDYGNSVUVTTQVGCR	rlmN	Probable dual-specificity RNA methyltransferase RlmN	no		no			2.18809		1.27941		0.326646				2.92353	1.45265	1.43012	1.12869	0.388575	0.264717
Q2G2J8_C57	Q2G2J8	LAETLSEVVDTPMHQVNUSVDLDTESLLGFK	SAOUHSC_01413	Uncharacterized protein SAOUHSC_01413	no		no	2.23033		1.55793						2.50248	1.95817	1.65942	1.45644
Q2FWY9_C91	Q2FWY9	DNIITNGLETTUASK	gatA	Glutamyl-tRNA(Gln) amidotransferase subunit A	yes		no	1.86386		1.25215		0.644993		-0.0607908		1.97016	1.75755	1.10015	1.40416	0.775893	0.514093	0.0172093	-0.138791
Q2FVV9_C63	Q2FVV9	SUSTVIDRPMTVNTVNNDVK	SAOUHSC_02582	Putative formate dehydrogenase SAOUHSC_02582	no	Functional site	no	1.61509		2.04101						1.57168	1.65851	2.22666	1.85535
Q2FXM9_C8	Q2FXM9	IVUTIGPASESEEMIEK	pyk	Pyruvate kinase	yes		no	1.92088		1.38634		0.97873		-0.666218		2.05368	1.78808	1.25305	1.51963	1.03926	0.918203	-0.685099	-0.647338
Q2FXJ0_C152	Q2FXJ0	TSFLIGDGTGMGLPESDYFAFEAUEYR	murC	UDP-N-acetylmuramate--L-alanine ligase	yes		no	3.31556		0.283799		-0.0086234				3.73837	2.89275	0.287472	0.280125	0.068602	-0.0858488
Q2G238_C275	Q2G238	AFQQAVAUGTATAFDEDLATR	SAOUHSC_00707	Tagatose-6-phosphate kinase	no		no	1.80951		1.00349		0.552225		0.200988		1.95181	1.66721	0.937344	1.06963	0.555816	0.548634	0.228849	0.173127
Q2FVQ0_C188	Q2FVQ0	KPLASSTWQAUVDPVGGEGINYVTK	SAOUHSC_02652	Uncharacterized protein	no		no	3.5658								3.87036	3.26123
Q2G295_C216	Q2G295	NGLQLGDTLNUSGAESYK	SAOUHSC_01850	Catabolite control protein A	no		no	2.23922		1.10757		0.461438		-0.249827		2.50539	1.97305	1.09329	1.12184	0.445303	0.477574	-0.134405	-0.365248
Q2FZX3_C77	Q2FZX3	FSNIQDYIFEYUNFGCPYFVLR	SAOUHSC_00862	Uncharacterized protein	no		no	1.51254		1.74661		0.652371		-0.421111		1.74537	1.27971	2.0251	1.46811	0.614192	0.690551	-0.487278	-0.354944
Q7X2S2_C78	Q7X2S2	SNSDTTPAMPLDTUGAMSQGMIGYWLETEINR	arcC2	Carbamate kinase 2	no		no	3.47184								4.16148	2.7822
Q2FWY1_C110	Q2FWY1	IANFETAGPLUYR	ppaC	Probable manganese-dependent inorganic pyrophosphatase	yes		no	1.84605		1.5066		0.321684		-0.208529		2.02949	1.66262	1.47035	1.54285	0.366812	0.276556	-0.144744	-0.272315
Q2FZ02_C230	Q2FZ02	FCTYUIVPFTR	miaB	tRNA-2-methylthio-N(6)-dimethylallyladenosine synthase	no	Functional site	no			2.27715		1.18605						1.70664	2.84766	1.3364	1.03569
Q2FZC7_C55	Q2FZC7	ENLNVIAULMEIR	SAOUHSC_01105	Iron-sulphur subunit of succinate dehydrogenase, putative	no		no	1.49844		1.29928		0.773041		-0.110518		1.47742	1.51945	1.06387	1.53468	0.746829	0.799253	-0.0824995	-0.138537
Q2G1C8_C143	Q2G1C8	TUFALTEPEHGSDVAGGLETVAER	SAOUHSC_00197	Uncharacterized protein	no		no	1.46687		1.41738		0.758075		-0.184439		1.64071	1.29302	1.19465	1.64011	0.745194	0.770956	-0.170897	-0.197981
Q2G292_C147	Q2G292	ASGFUIYNDIAITAQYLAK	SAOUHSC_01849	Uncharacterized protein	no		no	3.44348								3.91409	2.97288
Q2FYS0_C275	Q2FYS0	SHLVNLUK	SAOUHSC_01365	Uncharacterized protein	no		no	1.67431		1.0338		0.797291		-0.0622687		1.69933	1.64929	0.794686	1.27292	1.05158	0.543001	0.0863762	-0.210913
Q2FXL6_C137	Q2FXL6	HAPUDVLVVR	SAOUHSC_01819	Putative universal stress protein SAOUHSC_01819	no		no	1.9409		1.59486		0.321544		-0.452247		2.08076	1.80103	1.53277	1.65695	0.30249	0.340598	-0.562923	-0.341572
Q2FXW5_C118	Q2FXW5	TGATGIIVADPLIIETUK	SAOUHSC_01716	Uncharacterized protein	no		no	2.64445				0.956808		-0.218404		1.79077	3.49812			0.865875	1.04774	-0.177798	-0.259011
Q2FXI5_C187	Q2FXI5	YGUVLAIEILELLK	SAOUHSC_01861	Uncharacterized protein	no	Functional site	no	1.18187		1.39605		1.10052		-0.347603		1.20852	1.15523	1.40534	1.38676	1.33868	0.862352	-0.414941	-0.280265
Q2FYF3_C14	Q2FYF3	VESIIIGGGPUGLSAAIEQK	SAOUHSC_01499	Uncharacterized protein	no		no	0.636939		1.48794		0.992257		0.188847		0.785603	0.488275	1.34656	1.62933	0.984121	1.00039	0.155879	0.221815
Q2G0U3_C264	Q2G0U3	TIUAITKEPYTK	SAOUHSC_00434	Transcriptional regulator, lysR family, putative	no		no	2.25239		1.13212		-0.0812809				2.01685	2.48792	1.04187	1.22237	0.143655	-0.306216
Q2FZ02_C227	Q2FZ02	FUTYCIVPFTR	miaB	tRNA-2-methylthio-N(6)-dimethylallyladenosine synthase	no	Functional site	no	3.2826								3.58832	2.97688
Q2G203_C37	Q2G203	IEIYSFFDPFSSDUFK	SAOUHSC_00938	UPF0413 protein SAOUHSC_00938	no		no	2.65824		1.29878		0.00633255		-0.683109		2.25254	3.06395	1.4828	1.11477	0.0784732	-0.0658081	-0.614558	-0.751659
Q2FY53_C111	Q2FY53	SNNDWQUPLTIR	SAOUHSC_01612	2-oxoisovalerate dehydrogenase, E1 component, beta subunit, putative	no		no	1.06508		1.04111		0.812773		0.360982		1.00225	1.12791	0.665211	1.417	0.774587	0.850959	0.280481	0.441483
Q2G0P6_C157	Q2G0P6	SLDISYDEQLGYLTTUPTNIGTGMR	mcsB	Protein-arginine kinase	no		no	3.27843								3.57543	2.98143
Q2FY34_C330	Q2FY34	ATSNIUSNQALNALASSIAMSALGK	gcvPA	Probable glycine dehydrogenase (decarboxylating) subunit 1	no		no	1.482		1.28882		0.868418		-0.367846		1.62663	1.33737	1.28333	1.29431	0.889419	0.847416	-0.34485	-0.390842
Q2FXZ6_C47	Q2FXZ6	VDFEANADVFVINTUTVTNTGDKK	SAOUHSC_01679	Uncharacterized protein	no		no	1.46126		1.71529						1.44308	1.47944	1.57211	1.85846
Q2FZ02_C147	Q2FZ02	ERPDILIGVCGUMSQEESVVNK	miaB	tRNA-2-methylthio-N(6)-dimethylallyladenosine synthase	no	Functional site	no	1.33		1.83437						1.44228	1.21773	1.8337	1.83503
Q2FYJ0_C1074	Q2FYJ0	DIHESIUQSTLGLLQPQMGLLR	SAOUHSC_01455	Uncharacterized protein	no		no	1.79205		1.30479		0.0650979				1.96107	1.62302	1.28534	1.32423	0.292075	-0.161879
Q2FY73_C103	Q2FY73	HFHHHLVCMEUGR	SAOUHSC_01592	Transcriptional regulator, Fur, putative	yes		no	3.15362								2.83958	3.46767
Q2FV20_C110	Q2FV20	NVUQAVVYISGQK	SAOUHSC_02920	2-dehydropantoate 2-reductase	no		no	1.77105		1.2947		0.423968		-0.345846		2.11247	1.42964	1.19956	1.38984	0.537246	0.310689	-0.405967	-0.285724
Q2G1D8_C654	Q2G1D8	IPYDCUK	pflB	Formate acetyltransferase	no		no	1.53701		1.78782				-0.195798		1.12168	1.95233	1.36121	2.21444			-0.196426	-0.19517
Q2FVG3_C347	Q2FVG3	QQSLAITHUYFK	SAOUHSC_02751	Carboxylic ester hydrolase	no		no	2.08909		0.609902				0.424406		2.45887	1.71931	-0.134366	1.35417			0.392427	0.456386
Q2G243_C378	Q2G243	AVDGLDUYIGEVGLTGEVR	radA	DNA repair protein RadA	no		no	3.10463								3.77915	2.4301
Q2FZJ0_C724	Q2FZJ0	QIWEGAIAQULTTQD	purL	Phosphoribosylformylglycinamidine synthase subunit PurL	no		no	0.470016		1.76687		0.845269				0.50782	0.432211	1.67541	1.85834	0.88096	0.809579
Q2G1D0_C379	Q2G1D0	YGMVTMUIGVGMGAAAIFEYVR	SAOUHSC_00195	Acetyl-CoA acetyltransferase, putative	no	Functional site	no	1.18527		1.82796				0.0687718		1.29913	1.07142	1.85204	1.80389			0.162339	-0.0247954
Q2G0K8_C239	Q2G0K8	HPNVEIYLDDEAUPK	nagB	Glucosamine-6-phosphate deaminase	no		no	1.02584		1.07613		0.837858		0.105399		1.19528	0.856388	1.10702	1.04523	0.780646	0.89507	0.224905	-0.0141062
Q2G2P8_C147	Q2G2P8	LKPQLPTUR	nnrD	ADP-dependent (S)-NAD(P)H-hydrate dehydratase	no		no	0.721479		0.741938		1.12547		0.451448		0.984261	0.458697	0.537445	0.946431	1.05603	1.19491	0.44074	0.462157
P0A011_C107	P0A011	LPDULVEWSAK	lacD	Tagatose 1,6-diphosphate aldolase	no		no	0.85809		1.76092		0.720622		-0.306855		0.83875	0.87743	1.65549	1.86635	0.584531	0.856714	-0.331518	-0.282193
Q2G2A1_C88	Q2G2A1	QGVSTEGATIYVTHFPULNCTK	SAOUHSC_01692	Uncharacterized protein	no	Functional site	no	0.618917		1.86322		0.541745				0.769095	0.46874	1.7891	1.93734	0.471656	0.611833
Q2FYZ0_C64	Q2FYZ0	DQGFVILGFPUNQFGGQEPGSGEEAAQNCK	SAOUHSC_01282	Glutathione peroxidase	no		no	1.48334		1.35373		0.324329		-0.141747		1.71267	1.25401	1.28978	1.41768	0.391016	0.257643	-0.100679	-0.182814
Q2FY59_C60	Q2FY59	LGANNLVUTMNSTIEEGEVPK	SAOUHSC_01606	Peptidase T, putative	no		no	1.93166		1.08045						2.11726	1.74605	1.15342	1.00748
Q2FVF9_C185	Q2FVF9	YGUALAIEVLK	SAOUHSC_02755	Uncharacterized protein	no	Functional site	no	2.27395		0.615829		0.390474		-0.289784		2.62922	1.91867	0.992261	0.239398	0.222681	0.558268	-0.325124	-0.254444
Q2G282_C105	Q2G282	FDFNTHNHYHIICEQUGK	perR	Peroxide-responsive repressor PerR	no	Functional site	no	2.97957								3.55373	2.40542
Q2FXM9_C266	Q2FXM9	QUNKLGKPVITATQMLDSMQR	pyk	Pyruvate kinase	yes		no	2.97248								2.41752	3.52745
Q2G2L1_C112	Q2G2L1	MLUMGFK	tagH	Teichoic acids export ATP-binding protein TagH	yes		no	2.95682								2.64164	3.272
Q2FUU3_C9	Q2FUU3	IIPULDVK	hisF	Histidine biosynthesis bifunctional protein HisIE	no	Functional site	no	1.98825		0.743		0.559056		-0.33856		2.27393	1.70257	0.637842	0.848157	0.730749	0.387363	-0.36201	-0.315109
Q2FXI5_C238	Q2FXI5	ASAEMIDPDVAFVVDUSPANDVK	SAOUHSC_01861	Uncharacterized protein	no	Functional site	no	2.91165								3.41913	2.40417
Q2FZR9_C220	Q2FZR9	ALSTNDDIETAUR	SAOUHSC_00921	3-oxoacyl-[acyl-carrier-protein] synthase 2	yes		no	1.84296		0.0812945		1.06997		-0.0918821		2.03919	1.64673	-0.144839	0.307429	1.1137	1.02623	-0.0406304	-0.143134
Q2FXI5_C345	Q2FXI5	SLLSEAIUNLDNNQIETLQYK	SAOUHSC_01861	Uncharacterized protein	no		no	2.38355		0.925956		0.344928		-0.759682		2.58698	2.18012	0.887993	0.963918	0.351289	0.338567	-0.721801	-0.797563
Q2FYZ9_C589	Q2FYZ9	VMDYNDYVPNNURLDNETFIYLITGPNMSGK	mutS	DNA mismatch repair protein MutS	no		no	2.86541								3.12819	2.60262
Q2FW49_C179	Q2FW49	AISLUQK	SAOUHSC_02468	Acetolactate synthase, putative	no		no	2.38954		0.174717				0.299493		2.68338	2.09569	0.0729976	0.276437			0.371615	0.227371
Q2FYG1_C320	Q2FYG1	EUVKDLMER	gpsA	Glycerol-3-phosphate dehydrogenase [NAD(P)+]	no		no	2.57348		1.06466		-0.035262		-0.743573		2.78627	2.3607	0.424277	1.70505	-0.0367182	-0.0338058	-0.82105	-0.666095
Q53727_C92	Q53727	LVGDQAEVIWMSTFHSMUVR	pcrA	ATP-dependent DNA helicase PcrA	yes		no	1.68072		1.146						1.85993	1.50152	1.39654	0.895458
Q2G1Y9_C9	Q2G1Y9	QVQCIIUDAK	SAOUHSC_01060	Uncharacterized protein	no		no	3.21267						-0.420284		3.65088	2.77446					-0.521018	-0.31955
Q2FXF5_C15	Q2FXF5	TIYFICTGNSUR	arsC	Arsenate reductase	no	Functional site	no			1.55854		1.21891						1.38078	1.7363	0.966209	1.4716
Q2FUX5_C58	Q2FUX5	VPIDUETWIYK	argR	Arginine repressor	no		no	2.75258								2.26057	3.2446
Q2FX96_C289	Q2FX96	ALQEUINNVK	SAOUHSC_01981	Sensor histidine kinase, putative	no		no	1.92098		1.53698		-0.198705		-0.537309		2.10605	1.73591	1.43365	1.6403	-0.0628214	-0.334589	-0.522716	-0.551903
Q2FVV7_C14	Q2FVV7	LIUSWLK	SAOUHSC_02584	Uncharacterized protein	no		no	2.21653		0.68939		0.230457		-0.434007		2.51337	1.9197	0.621991	0.75679	0.3359	0.125013	-0.356168	-0.511845
Q2G1K9_C431	Q2G1K9	VLVNTPSAVGGIGDMYNELIPSLTLGUGSYGR	SAOUHSC_00113	Aldehyde-alcohol dehydrogenase	no		no	2.69822								3.35657	2.03988
Q2G115_C101	Q2G115	EVDAIUQVVR	ychF	Ribosome-binding ATPase YchF	no		no	1.54032		1.40399		0.126161		-0.37632		1.63143	1.44922	1.49421	1.31377	0.207018	0.0453032	-0.351387	-0.401254
Q2FZX4_C272	Q2FZX4	HUQAGPLVR	lipA	Lipoyl synthase	no		no	1.47111		1.08976		0.536361		-0.403404		1.6544	1.28782	0.853009	1.32651	0.574343	0.498379	-0.404873	-0.401935
Q2FV10_C289	Q2FV10	NPNIIFDDADFELAVDQALNGGYFHAGQVUSAGSR	SAOUHSC_02933	Betaine aldehyde dehydrogenase	no		no	1.11587		0.916042		0.635003		0.0269025		1.82574	0.405992	0.783499	1.04858	0.81836	0.451646	0.15069	-0.0968846
Q2FZI8_C88	Q2FZI8	HDSIGIDAVAMUVNDILTTGAEPLYFLDYIATNK	purM	Phosphoribosylformylglycinamidine cyclo-ligase	no		no	2.6876								2.92585	2.44935
Q2FZX3_C81	Q2FZX3	FSNIQDYIFEYCNFGUPYFVLR	SAOUHSC_00862	Uncharacterized protein	no		no	2.67147								2.91831	2.42463
Q2G1J0_C290	Q2G1J0	SANIILDDANLDLAVEGIQLGILFNQGEVUSAGSR	aldA	Putative aldehyde dehydrogenase AldA	no	Functional site	no	1.52893		1.22827		0.102908		-0.190961		1.62059	1.43728	1.2052	1.25133	0.14965	0.0561673	-0.142576	-0.239345
Q2FYH2_C229	Q2FYH2	ELMYTTGULEIEHGDANEGVLLLK	SAOUHSC_01480	Uncharacterized protein	no		no	1.28332		0.738006		0.582944				1.40534	1.16131	0.614851	0.861161	0.659285	0.506602
O07325_C203	O07325	ELGAUVIDIGEDVTQVAFYER	ftsA	Cell division protein FtsA	yes		no	1.79019		0.886547		0.301795		-0.378505		1.75835	1.82204	0.77989	0.993203	0.277628	0.325962	-0.306787	-0.450222
Q2G2L2_C236	Q2G2L2	LNETFMSSTDUSDPSQR	SAOUHSC_00637	Uncharacterized protein	no		no			1.76148		0.706823		0.129632				1.73669	1.78626	0.648281	0.765365	0.189287	0.0699771
Q2G248_C126	Q2G248	SFVFGPUSVESFEQVEAVAK	SAOUHSC_01852	Uncharacterized protein	no		no	1.204		0.581404		0.760391		0.0423901		1.19774	1.21026	0.464145	0.698663	0.785174	0.735609	0.0311128	0.0536674
Q2FWE2_C209	Q2FWE2	IDGIVQAEQSEEGLESTVLDUTSFPYK	SAOUHSC_02357	Threonylcarbamoyl-AMP synthase	yes	Functional site	no	1.14396		1.4442						1.24787	1.04005	1.36715	1.52125
Q2G115_C306	Q2G115	QGMTAPQUAGIIHTDFER	ychF	Ribosome-binding ATPase YchF	no		no	1.97577		1.04425		-0.441009				2.16537	1.78618	1.20339	0.885106	-0.330157	-0.55186
Q2FXM3_C218	Q2FXM3	MLPFQGYVLQHFELMDDGFUQVK	SAOUHSC_01812	Uncharacterized protein	no		no	1.5936		0.974134						1.69924	1.48795	1.02935	0.91892
Q2FV74_C295	Q2FV74	AUVDLSIQYIPQR	clpL	ATP-dependent Clp protease ATP-binding subunit ClpL	no		no	2.01942		1.64083		-0.380854		-0.719984		2.18034	1.8585	1.60431	1.67735	-0.44841	-0.313298	-0.945777	-0.49419
Q2G2J8_C226	Q2G2J8	ALLDLUDLITVMPVER	SAOUHSC_01413	Uncharacterized protein SAOUHSC_01413	no		no	2.25538		1.20683		0.0250266		-0.930299		2.43392	2.07683	1.23039	1.18326	0.0817487	-0.0316954	-0.967081	-0.893518
Q2FZX4_C41	Q2FZX4	NLNTVUEEAK	lipA	Lipoyl synthase	no	Functional site	no	1.54275		0.797065		0.343874		-0.149917		1.64624	1.43927	0.708565	0.885565	0.337092	0.350656	-0.13181	-0.168025
Q2FXQ7_C16	Q2FXQ7	CSFUGKDQDQVK	clpX	ATP-dependent Clp protease ATP-binding subunit ClpX	no		no	1.77788		1.98671		-0.293571		-0.944909		1.92212	1.63365	1.93731	2.03611	-0.199581	-0.387561	-1.03491	-0.854904
Q2FY72_C48	Q2FY72	ELVYHNGAVAVUAVTPK	SAOUHSC_01593	NUDIX domain protein	no		no	1.93932		1.31899		0.226509		-0.963095		2.07307	1.80558	1.26843	1.36955	0.30871	0.144307	-0.974007	-0.952182
Q2FXU0_C64	Q2FXU0	GFIIGUPVAYSMGIGFAPVR	apt	Adenine phosphoribosyltransferase	no		no	0.767723		0.871572		0.709776		0.147794		0.897026	0.63842	0.773378	0.969765	0.736686	0.682866	0.131325	0.164263
P95689_C356	P95689	EISSCSNUTDFQAR	serS	Serine--tRNA ligase	yes	Functional site	no	1.4325		0.971799		-0.0214307		0.107419		1.47571	1.38929	0.798507	1.14509	-0.0869057	0.0440443	-0.0324099	0.247249
Q2G078_C430	Q2G078	DISUNLGSLNIVNVMESGK	SAOUHSC_00742	Ribonucleoside-diphosphate reductase	yes		no	2.67801		1.10832		-0.163142		-1.13635		3.0235	2.33251	1.10427	1.11237	-0.131693	-0.194592	-1.2253	-1.0474
Q2FWG1_C215	Q2FWG1	HTHGTGUTFSAVITAELAK	SAOUHSC_02330	Phosphomethylpyrimidine kinase	no		no	2.46236								2.71927	2.20546
Q2FZ43_C110	Q2FZ43	ADHIVFIUGHYEGYDER	trmD	tRNA (guanine-N(1)-)-methyltransferase	yes	Functional site	no	1.6353		0.725076		0.28324		-0.192515		1.83742	1.43317	0.74192	0.708231	0.313942	0.252537	-0.164383	-0.220648
Q2FXP0_C285	Q2FXP0	NSHYUPVCQK	SAOUHSC_01796	Formamidopyrimidine-DNA glycosylase	no		no	0.308716		1.41838		0.828616		-0.106889		0.272262	0.345169	1.48949	1.34727	0.885262	0.77197	-0.138426	-0.0753528
Q2G234_C131	Q2G234	YAGYDNUGDPAEK	SAOUHSC_02134	Nitric oxide synthase oxygenase	no		no	2.59542		0.360623		0.0168435		-0.541502		2.83611	2.35473	0.408929	0.312317	0.0321008	0.00158609	-0.530552	-0.552453
Q2G1D8_C653	Q2G1D8	IPYDUCK	pflB	Formate acetyltransferase	no		no	1.59923				0.951397		-0.142041		1.83047	1.36799			1.01628	0.886511	-0.0110332	-0.273048
Q2G0I8_C196	Q2G0I8	LUEDPQYMSHVK	SAOUHSC_00577	Mevalonate kinase, putative	yes		no	1.78117		0.674559		-0.0593596				1.93772	1.62462	0.613249	0.735869	-0.187871	0.0691522
Q2G255_C99	Q2G255	EYDLDLLHMHYAVPHAIUGILAR	SAOUHSC_01475	Uncharacterized protein	no		no	2.39068								2.97207	1.80929
Q2FZR5_C173	Q2FZR5	IVIATALAUEPK	SAOUHSC_00925	Uncharacterized protein	no		no	2.47768		0.934723		-0.218449		-0.804673		2.74556	2.2098	0.879	0.990447	-0.0603521	-0.376545	-0.780859	-0.828486
Q2FWD9_C145	Q2FWD9	LQAVUAVCGSSSSR	tdk	Thymidine kinase	no	Functional site	no	0.852478		1.78272		0.278504		-0.53004		0.991173	0.713784	1.774	1.79144	0.338909	0.218099	-0.459219	-0.600862
Q2G038_C250	Q2G038	QAGQPFIDYVIUSTQTFNAQVLK	SAOUHSC_00788	Gluconeogenesis factor	yes		no	1.73427		1.44215		-0.128484		-0.664575		1.92311	1.54542	1.41938	1.46493	-0.0292936	-0.227675	-0.658675	-0.670475
Q2FY19_C134	Q2FY19	HKLEVYGVCESUQD	fur	Ferric uptake regulation protein	no		no	0.685981				1.65775		0.037866		0.689299	0.682663			1.22194	2.09356	0.258338	-0.182606
Q2G1I7_C135	Q2G1I7	TYVUEDMSK	SAOUHSC_00135	Uncharacterized protein	no		no	0.322418		0.565702		1.49128				0.470303	0.174534	0.418676	0.712728	1.23303	1.74953
Q2G234_C354	Q2G234	ESNANQUPFHH	SAOUHSC_02134	Nitric oxide synthase oxygenase	no		no	2.36647								2.63015	2.10279
Q2FY27_C237	Q2FY27	AGDQFUIFITEK	SAOUHSC_01646	Glucokinase, putative	no		no	1.63735		1.62912		0.339501		-1.24601		1.74648	1.52822	1.60041	1.65782	0.405666	0.273337	-1.2623	-1.22972
Q2FZC7_C181	Q2FZC7	CMTCGVCLEVUPNVTENNK	SAOUHSC_01105	Iron-sulphur subunit of succinate dehydrogenase, putative	no		no	2.35155								2.8429	1.86021
Q2FV13_C18	Q2FV13	SYVIEELDDULTIQK	SAOUHSC_02930	Uncharacterized protein	no		no	0.832894		1.31541		0.657163		-0.463768		1.32175	0.344033	1.22027	1.41056	0.688494	0.625832	-0.441027	-0.486509
Q2FXM0_C163	Q2FXM0	RHPVDVUFVPIGDNFTMGIDDASYAINEFIKPK	SAOUHSC_01815	UPF0173 metal-dependent hydrolase SAOUHSC_01815	no		no	2.33254								2.65526	2.00981
Q2FWD9_C12	Q2FWD9	MYETYHSGWIEUITGSMFSGK	tdk	Thymidine kinase	no	Functional site	no	1.92365		0.399556						2.01924	1.82806	0.354339	0.444773
Q2FZ02_C145	Q2FZ02	ERPDILIGVUGCMSQEESVVNK	miaB	tRNA-2-methylthio-N(6)-dimethylallyladenosine synthase	no	Functional site	no	2.31697								1.35857	3.27538
Q2FXY7_C306	Q2FXY7	MNPMVYUGLFPIDNK	lepA	Elongation factor 4	no		no	2.31315								2.58376	2.04254
O06446_C831	O06446	NDDCPUGSGK	secA1	Protein translocase subunit SecA 1	yes	Functional site	no			2.00019		0.140283		0.170626				1.77144	2.22893	0.143685	0.136881	0.233996	0.107257
Q2FXI7_C197	Q2FXI7	ILNTAFLNEIEAQUQGEMLVAVPHQDVLIIADIR	SAOUHSC_01859	UPF0354 protein SAOUHSC_01859	no		no	1.06913		1.63903				-0.398191		1.15231	0.985938	1.6255	1.65256			-0.267288	-0.529094
Q2G064_C153	Q2G064	AGIVEIMEAIUYLQEHPEIK	pepT	Peptidase T	no		no	0.759393		1.54571						1.01635	0.502432	1.50162	1.58981
Q2FZJ4_C180	Q2FZJ4	LIETSEUVAEK	purK	N5-carboxyaminoimidazole ribonucleotide synthase	no	Functional site	no	1.08581		1.23795		0.280708		-0.309867		1.18618	0.985428	1.15316	1.32274	0.331705	0.229711	-0.284107	-0.335626
Q2FZ50_C95	Q2FZ50	ATIVUEPSLVIFANK	rnc	Ribonuclease 3	no		no	1.82818		1.01193		0.256277		-0.804292		2.14444	1.51192	0.941557	1.08229	0.236952	0.275603	-0.811321	-0.797263
Q2FVU4_C471	Q2FVU4	ENIKDVTNUTTR	SAOUHSC_02597	PTS system component, putative	no	Functional site	no	2.20543		0.269411		0.11893		-0.303162		2.40801	2.00285	0.0285692	0.510253	0.176706	0.0611541	-0.260117	-0.346206
Q2G039_C30	Q2G039	SLVIQULEDMGYFCVDNLPPVLLPK	SAOUHSC_00787	Nucleotide-binding protein SAOUHSC_00787	no	Functional site	no	1.25887		1.18062		-0.154799				1.4061	1.11163	1.33302	1.02822	-0.175517	-0.134081
Q2FZP0_C494	Q2FZP0	ISUSDNFIVK	SAOUHSC_00960	Uncharacterized protein	no		no	1.62075		0.820881		0.150879		-0.322266		1.76077	1.48073	0.509645	1.13212	0.126841	0.174918	-0.406312	-0.238221
Q2G2R8_C238	Q2G2R8	ETQGNNGWUAGYTMSELLNATYNTNK	sspP	Staphopain A	no	Functional site	no	2.2607								1.65081	2.87058
Q2FWH3_C286	Q2FWH3	ATDUSGLVR	ddl	D-alanine--D-alanine ligase	yes		no			1.73847		0.669566		-0.148209				1.72111	1.75583	0.471552	0.86758	-0.149281	-0.147138
Q2G0S8_C139	Q2G0S8	IGTDIPFUIYNK	SAOUHSC_00466	Putative 4-diphosphocytidyl-2-C-methyl-D-erythritol kinase	no	Functional site	no	1.7545		1.11696		0.283035		-0.909603		1.53212	1.97688	1.11982	1.1141	0.483777	0.0822938	-0.872763	-0.946444
Q2FUZ6_C38	Q2FUZ6	VILVVNTATEUIYSEQLK	SAOUHSC_02949	Glutathione peroxidase	no	Functional site	no	0.835274		1.40079						1.05325	0.617298	1.3744	1.42718
Q2FZV8_C103	Q2FZV8	QSLMGGGFQIDNPNAIASCGUGSSFR	SAOUHSC_00877	Uncharacterized protein	no		no	1.89675		0.929514		-0.600488				1.85627	1.93723	0.917546	0.941482	-0.584804	-0.616171
Q2FYZ5_C384	Q2FYZ5	ATLESLUYQTR	glpK	Glycerol kinase	no		no	1.05546		1.11014		0.343975		-0.301373		1.18485	0.926075	1.02928	1.19099	0.38648	0.301471	-0.264495	-0.33825
Q2G1H4_C81	Q2G1H4	TUIPPLVEK	argC	N-acetyl-gamma-glutamyl-phosphate reductase	no		no			1.89399		0.743449		-0.443567				2.1141	1.67387	0.788769	0.69813	-0.328978	-0.558155
Q2G163_C158	Q2G163	TNVTVIUAGAK	psuG	Pseudouridine-5'-phosphate glycosidase	no	Functional site	no	2.27332		-0.00138466		0.278205		-0.356463		2.46686	2.07977	0.0483757	-0.051145	-0.117146	0.673556	-0.311291	-0.401635
Q2G124_C88	Q2G124	VUGSGLK	SAOUHSC_00336	Probable acetyl-CoA acyltransferase	yes	Functional site	no	1.00573		1.99529		-0.408619		-0.40534		1.21661	0.794853	1.75035	2.24022	-0.309574	-0.507665	-0.379995	-0.430684
Q2G002_C216	Q2G002	TAQGVFGGALTYGUIGVPQAPGQIDVTDLK	aroD	3-dehydroquinate dehydratase	no		no	1.8739		1.19887		-0.18428		-0.716612		1.95561	1.79219	1.09072	1.30702	-0.170248	-0.198312	-0.688567	-0.744656
Q2FVT8_C225	Q2FVT8	VNUVAPGPFWSPLQISGGQPQSK	SAOUHSC_02604	Uncharacterized protein	no		no	1.02519		1.35923		0.380995		-0.594444		1.17358	0.876802	1.23499	1.48347	0.43189	0.330099	-0.556818	-0.63207
Q2G139_C125	Q2G139	WUNQLNK	SAOUHSC_00316	Uncharacterized protein	no		no	2.15798								1.39083	2.92513
Q2FWZ6_C22	Q2FWZ6	TSIUSVGMVK	SAOUHSC_02110	Uncharacterized protein	no		no	2.10114								2.27986	1.92243
Q2G094_C30	Q2G094	GYEHDGVIPUGALDTLAHEIANR	SAOUHSC_00727	Uncharacterized protein	no		no	2.09801								2.29013	1.90589
Q2G032_C96	Q2G032	DLNIDVVLEUTGFYTDKDK	SAOUHSC_00795	Glyceraldehyde-3-phosphate dehydrogenase	yes		no	0.172044		0.938104		0.620666		0.330735		0.19103	0.153058	0.736215	1.13999	0.661232	0.5801	0.366794	0.294677
Q2FYZ9_C630	Q2FYZ9	QVAIISIMAQMGAYVPUK	mutS	DNA mismatch repair protein MutS	no		no	2.03085								2.44411	1.61758
Q2G1G4_C124	Q2G1G4	FVATNIMDAQIDAIUDVLK	SAOUHSC_00160	Uncharacterized protein	no		no	1.59689		0.433698						1.65618	1.53759	0.268554	0.598842
Q2G2W9_C166	Q2G2W9	SLUCSTFLGDFEPVSIK	SAOUHSC_00455	Uncharacterized protein	no		no	2.02761								2.68661	1.3686
Q2FZG9_C297	Q2FZG9	HELLILUTGSQGEPMAALSR	rnj1	Ribonuclease J 1	yes		no	1.58885		0.752513				-0.31819		1.74291	1.43479	0.599984	0.905043			-0.566293	-0.0700878
Q2G2N4_C17	Q2G2N4	TLNNNVVVUTNNDQEVILIGK	glcT	Protein GlcT	no		no	2.41764				-0.398337				2.63145	2.20383			-0.304879	-0.491794
Q2FY49_C129	Q2FY49	TLPGNAQSIGAILDQINWEEVLGTICGDDTULIICR	argR	Arginine repressor	no		no	2.69718		0.953962		-0.557323		-1.07482		3.09743	2.29693	0.828632	1.07929	-0.52338	-0.591266	-1.39172	-0.757916
Q2FYZ5_C254	Q2FYZ5	TIDYHFYGQEVPIAGVAGDQQAALFGQAUFER	glpK	Glycerol kinase	no		no	0.876369		0.900359		0.374613		-0.148866		1.0043	0.74844	0.814677	0.98604	0.424828	0.324399	-0.0747487	-0.222984
Q2FXP5_C97	Q2FXP5	YLQUPCK	SAOUHSC_01791	Uncharacterized protein	yes		no			1.98851		0.0372488		-0.0274623				1.92342	2.0536	-0.0427986	0.117296	0.228234	-0.283158
Q2FWY3_C261	Q2FWY3	FINUEGGIR	SAOUHSC_02138	Uncharacterized protein	no		no	1.59497		1.26281		-0.0841127		-0.77789		1.70487	1.48507	1.19862	1.327	-0.0445086	-0.123717	-0.804048	-0.751732
Q2G0I7_C278	Q2G0I7	EAGYPUYFTMDAGPNVK	SAOUHSC_00578	Diphosphomevalonate decarboxylase	yes		no	1.99444								2.06736	1.92151
Q2G0R6_C202	Q2G0R6	SDGADNVVTUPLYELDHDENAFNNLTSVFVPK	SAOUHSC_00480	Uncharacterized protein	no		no	0.731696		1.26209						0.824809	0.638584	1.12928	1.3949
Q2FZC7_C174	Q2FZC7	CMTUGVCLEVCPNVTENNK	SAOUHSC_01105	Iron-sulphur subunit of succinate dehydrogenase, putative	no		no			1.98399								2.47316	1.49483
Q2FWB9_C37	Q2FWB9	SVUVNPTHVK	deoC	Deoxyribose-phosphate aldolase	no		no	0.994127		1.46661		0.283551		-0.769173		1.16247	0.825786	1.41315	1.52007	0.290188	0.276913	-0.760309	-0.778036
Q2FZV7_C238	Q2FZV7	IATPIVAUNEK	SAOUHSC_00878	NADH dehydrogenase-like protein SAOUHSC_00878	no		no	1.88029		0.976935		0.272048		-1.15859		2.07464	1.68594	0.80421	1.14966	0.352533	0.191563	-1.11827	-1.19891
Q2G025_C115	Q2G025	GIVTMUAPMGGK	SAOUHSC_00802	Carboxylesterase, putative	no		no	1.40613		0.558879						1.63831	1.17396	0.699729	0.418028
Q2FXU5_C565	Q2FXU5	TASATULLTNAPSEVSDK	aspS	Aspartate--tRNA ligase	yes		no	1.56641		1.124		-0.214081		-0.527469		1.7641	1.36871	0.982065	1.26594	-0.226159	-0.202003	-0.422334	-0.632603
Q2G2W4_C31	Q2G2W4	MIUAYCNINR	SAOUHSC_02631	Uncharacterized protein	no	Functional site	no	1.9482								2.41908	1.47731
Q2FZV6_C127	Q2FZV6	YDQLSDVLMAUGIQSER	SAOUHSC_00879	Probable cytosol aminopeptidase	no		no	1.9447								2.02258	1.86683
Q2FZY4_C66	Q2FZY4	FEGEGUSISMASASMMTQAVK	SAOUHSC_00850	Uncharacterized protein	yes		no	1.93805								2.10883	1.76727
Q2FZ73_C248	Q2FZ73	IPFFGIULGHQLFALSQGASSFK	carA	Carbamoyl-phosphate synthase small chain	no	Functional site	no	1.92795								2.06609	1.78981
Q2G0T5_C493	Q2G0T5	SSIESVVUNIVNK	dnaX	DNA polymerase III subunit gamma/tau	yes		no	1.45738		1.26995		0.339764		-1.14207		1.51954	1.39523	1.14117	1.39873	0.340619	0.338909	-1.21702	-1.06712
Q2FVG8_C207	Q2FVG8	IUIMSEGK	SAOUHSC_02744	Amino acid ABC transporter, ATP-binding protein, putative	no		no	1.92471								1.9428	1.90662
Q2FZW1_C15	Q2FZW1	MEHVSVVVYGADVIUASCVNAPTSK	SAOUHSC_00874	Uncharacterized protein	no		no	1.91723								2.07851	1.75596
Q2FUS7_C252	Q2FUS7	DWFDGKPUER	SAOUHSC_03024	UPF0176 protein SAOUHSC_03024	no		no					1.91353								1.66389	2.16318
A0A0H3KE27_C18	A0A0H3KE27	GLIDESLTUQDK	rsbU	sigma factor sigB regulation protein	no		no			1.54406		0.668649		-0.32894				1.51935	1.56877	0.697418	0.63988	-0.24513	-0.41275
Q2FWY3_C150	Q2FWY3	SUSFEGFIDYSGER	SAOUHSC_02138	Uncharacterized protein	no		no	1.88095								2.04883	1.71308
Q2FXF9_C245	Q2FXF9	SUDLTTILHNLYK	SAOUHSC_01889	Riboflavin biosynthesis protein RibD	no		no	1.54957		1.38235		-0.12997		-0.931859		1.50833	1.59082	1.26016	1.50454	-0.106034	-0.153906	-0.952179	-0.911539
Q2FY08_C137	Q2FY08	IIDDEGIVUPVSK	glyQS	Glycine--tRNA ligase	yes		no	1.5211		1.09986		-0.017136		-0.734405		1.67571	1.3665	1.08615	1.11357	0.061966	-0.0962381	-0.707484	-0.761327
Q2FW59_C112	Q2FW59	EKDDNILUEEFSYK	SAOUHSC_02458	Uncharacterized protein	no		no	0.62273		1.26515		0.682381		-0.704148		0.643764	0.601697	1.37228	1.15801	0.793521	0.57124	-0.673854	-0.734443
Q2FZZ2_C164	Q2FZZ2	ALANDPTVLLUDEATSALDPQTTDEILDLLLK	metN2	Methionine import ATP-binding protein MetN 2	no		no	1.84994		0.875646		-0.247627		-0.612142		2.05676	1.64312	0.868766	0.882526	-0.229146	-0.266108	-0.586276	-0.638007
Q2G0P6_C270	Q2G0P6	SLGILQNUR	mcsB	Protein-arginine kinase	no		no	1.09068		1.00757		0.38257		-0.615619		1.2587	0.922655	0.644133	1.371	0.48656	0.27858	-0.593725	-0.637513
Q2G182_C31	Q2G182	DIEAUQK	esxB	ESAT-6 secretion system extracellular protein B	no		no	1.8367								2.67947	0.993928
Q2FYZ5_C111	Q2FYZ5	QTQSIUSELK	glpK	Glycerol kinase	no		no	0.816792		0.91723		0.392855		-0.291002		0.953079	0.680504	0.843695	0.990766	0.440262	0.345448	-0.30927	-0.272733
Q2FYS0_C115	Q2FYS0	TDAGQIYTGTIULHETSVHVYR	SAOUHSC_01365	Uncharacterized protein	no		no	1.81796								1.852	1.78392
Q2FZZ6_C210	Q2FZZ6	SMFGGYDELMEPVUNTFTAK	SAOUHSC_00838	Uncharacterized protein	no		no	1.81332								1.85408	1.77256
Q2FZJ0_C55	Q2FZJ0	QPNFTETGIFSVMWSEHUSYK	purL	Phosphoribosylformylglycinamidine synthase subunit PurL	no	Functional site	no			1.80999								1.96647	1.65352
Q2G2M8_C97	Q2G2M8	EDGIYYYCNLSSPFVUDEEALK	SAOUHSC_02004	UPF0374 protein SAOUHSC_02004	no		no	1.20055		1.30893		-0.166956		-0.540583		1.16684	1.23426	0.97673	1.64113	-0.0428134	-0.291098	-0.328	-0.753166
Q2G0M6_C293	Q2G0M6	EMTMVMGTSTUHLMLNEK	araB	Ribulokinase	no		no	1.79957								2.38347	1.21566
Q2FVV9_C271	Q2FVV9	TVCTYCGVGUSFEVWTK	SAOUHSC_02582	Putative formate dehydrogenase SAOUHSC_02582	no	Functional site	no	1.79759								1.85862	1.73656
Q2FWX1_C63	Q2FWX1	VLVITEDWUGDAMMNLPILK	SAOUHSC_02150	Uncharacterized protein	no		no	1.32713		0.458372						1.58655	1.06771	0.160404	0.75634
Q2FYR0_C248	Q2FYR0	HINNNAQAIUK	SAOUHSC_01375	Uncharacterized protein	no		no	1.50192		1.10847		0.168125		-0.997293		1.60375	1.40009	1.12935	1.0876	0.312781	0.0234683	-0.858018	-1.13657
Q2G0G1_C89	Q2G0G1	VSIAWMFESUGR	adh	Alcohol dehydrogenase	no	Functional site	no			1.77713								1.99928	1.55498
Q2FYH5_C106	Q2FYH5	AFKDUNIQYRPK	dinG	Probable ATP-dependent helicase DinG homolog	no		no	1.7765								1.69439	1.85862
Q2G0S2_C255	Q2G0S2	EVYAUCTHPVLSGPAK	prs	Ribose-phosphate pyrophosphokinase	yes		no	1.10859		1.03195		0.112306		-0.521687		0.920176	1.29701	0.98448	1.07943	0.0762334	0.148379	-0.567061	-0.476313
Q2G157_C10	Q2G157	MLPHGLIVSUQALPDEPLHSSFIMSK	nanE	Putative N-acetylmannosamine-6-phosphate 2-epimerase	no		no	0.713992		1.01252						0.859174	0.56881	1.18929	0.835762
Q2G0V2_C164	Q2G0V2	ILLUDEATSALDPATTASILTLLK	metN1	Methionine import ATP-binding protein MetN 1	no		no	1.72628								1.74308	1.70947
Q2FY27_C252	Q2FY27	VANYIGYLUSIISVTSNPK	SAOUHSC_01646	Glucokinase, putative	no		no	1.71987		1.47193		-0.0547253		-1.4126		1.77248	1.66726	1.34937	1.5945	0.0149265	-0.124377	-1.33924	-1.48596
Q2G1G7_C224	Q2G1G7	QLIDFUK	SAOUHSC_00156	Uncharacterized protein	no		no	1.52434		1.62321		-0.161721		-1.26637		1.61476	1.43392	1.43622	1.8102	-0.0843185	-0.239123	-1.25154	-1.28121
Q2FXX2_C98	Q2FXX2	NIDISNDEIYNLMIYQLGALQGFUR	SAOUHSC_01708	UPF0271 protein SAOUHSC_01708	no		no	0.65574		1.25306		0.162149		-0.352456		0.793319	0.518161	1.13609	1.37004	0.1894	0.134897	-0.419	-0.285913
Q2G1X6_C136	Q2G1X6	HIITGVCETDFSGYPDUR	queC	7-cyano-7-deazaguanine synthase	no		no			2.22643				-0.523002				3.14048	1.31237			-0.362659	-0.683344
Q2G1K2_C101	Q2G1K2	EQPDALLILGDTNSULAAVSAK	SAOUHSC_00120	UDP-N-acetylglucosamine 2-epimerase	no		no	0.754466		1.35444		0.16398		-0.572374		0.800082	0.708849	1.26861	1.44026	0.154065	0.173895	-0.641671	-0.503078
Q2FWE2_C304	Q2FWE2	VAFIPSEAQFIQLUQDDNDVK	SAOUHSC_02357	Threonylcarbamoyl-AMP synthase	yes		no			1.60317		0.639887		-0.551414				1.45312	1.75322	0.611928	0.667847	-0.426878	-0.67595
Q2FWF5_C134	Q2FWF5	ATVDGQLAUSCELTFAIQDVK	fabZ	3-hydroxyacyl-[acyl-carrier-protein] dehydratase FabZ	yes		no	1.69063								1.80793	1.57333
Q2FWY3_C197	Q2FWY3	NVIIEDUYFGPSELPEMGSWNR	SAOUHSC_02138	Uncharacterized protein	no		no	1.68741								1.8439	1.53092
Q2G1X6_C23	Q2G1X6	AIVVFSGGQDSTTULFYAK	queC	7-cyano-7-deazaguanine synthase	no	Functional site	no	1.68622								1.85296	1.51949
Q2G2F1_C200	Q2G2F1	YUDRFIILDEGEVVAFGDLEALR	SAOUHSC_01967	ABC transporter, ATP-binding protein, putative	no		no	1.68581								1.63636	1.73526
Q2G1Z9_C154	Q2G1Z9	FRGDGLUVSTPSGSTAYNK	nadK	NAD kinase	yes	Functional site	no	2.09992						-0.415893		2.27059	1.92926					-0.281807	-0.549979
Q2G0W1_C640	Q2G0W1	LLAMIUNRPNVR	SAOUHSC_00413	UPF0753 protein SAOUHSC_00413	no		no	1.6757								1.45165	1.89976
Q2FY49_C124	Q2FY49	TLPGNAQSIGAILDQINWEEVLGTIUGDDTCLIICR	argR	Arginine repressor	no		no	1.75876		1.03106		-0.400506		-0.717082		1.25749	2.26003	1.16002	0.902112	-0.174833	-0.626179	-0.152917	-1.28125
Q2FZY4_C41	Q2FZY4	GVLDNGSMTVDMNNPTUGDR	SAOUHSC_00850	Uncharacterized protein	yes		no	1.67134								1.76837	1.5743
Q2FZ66_C300	Q2FZ66	GLNUHVNLIPVNHVPER	rlmN	Probable dual-specificity RNA methyltransferase RlmN	no		no	2.77855				-0.131231		-0.978402		3.13567	2.42143			-0.103581	-0.15888	-0.567618	-1.38919
Q2FYV2_C82	Q2FYV2	YSVDLPNLUIEMR	thrB	Homoserine kinase	no		no	1.65972								1.91491	1.40452
Q2FYG5_C110	Q2FYG5	VLKPGGMVVULETSQPTLPVFK	SAOUHSC_01487	Menaquinone biosynthesis methyltransferase, putative	no		no	1.14709		0.507715						1.23088	1.0633	0.320773	0.694657
Q2FYG9_C341	Q2FYG9	SDSUAVPAASIVCEHVVAFEIAK	aroC	Chorismate synthase	no	Functional site	no	1.52342		0.635549		0.0237116		-0.52844		1.75766	1.28919	0.703455	0.567643	0.0483757	-0.000952493	-0.47279	-0.58409
Q2FYG9_C350	Q2FYG9	SDSCAVPAASIVUEHVVAFEIAK	aroC	Chorismate synthase	no		no			1.65269								1.45454	1.85084
Q2FYR6_C113	Q2FYR6	TTLPVLUKDFIIDPLQIDVAK	trpC	Indole-3-glycerol phosphate synthase	no		no	1.34168		1.11772		0.0103555		-0.83018		1.37523	1.30813	0.867896	1.36754	-0.0528351	0.0735461	-0.910909	-0.749451
Q9RQQ0_C55	Q9RQQ0	CUFDYLNNIIMMNQNK	icaR	Biofilm operon icaADBC HTH-type negative transcriptional regulator IcaR	no		no	1.63653								1.72369	1.54937
Q2FYJ1_C61	Q2FYJ1	PTHVAVUWDMGQSTFR	SAOUHSC_01454	Uncharacterized protein	no		no	1.62436								1.48718	1.76154
Q2FXY7_C431	Q2FXY7	ATMMVPNDYVGAVMELUQR	lepA	Elongation factor 4	no		no	1.62345								1.68764	1.55925
Q2FV60_C274	Q2FV60	ILUTADFPSVAESLMPDFAPIK	crtN	Dehydrosqualene desaturase	no		no	1.59562								1.91046	1.28078
Q2G046_C122	Q2G046	VGKPYUPNHNIEIESQTVQQMVDR	uvrA	UvrABC system protein A	no		no	1.29423		1.22008				-0.926479		1.42734	1.16111	1.34727	1.09288			-1.45637	-0.396593
Q2FV10_C175	Q2FV10	IAPALATGUSLVMKPSEITPLTTIR	SAOUHSC_02933	Betaine aldehyde dehydrogenase	no		no	1.51785		-0.0537176		0.109192				1.6234	1.41229	-0.0893901	-0.0180451	0.160275	0.0581086
Q2G0R8_C645	Q2G0R8	LLUGDVGYGK	mfd	Transcription-repair-coupling factor	no	Functional site	no			1.81002		0.33451		-0.573459				1.73205	1.88799	0.393416	0.275603	-0.657536	-0.489382
Q2G1C0_C196	Q2G1C0	SILSDAUK	tarI	Ribitol-5-phosphate cytidylyltransferase 1	yes		no	1.07002		0.658692		0.152288		-0.321988		1.22021	0.919836	0.519542	0.797843	0.160791	0.143785	-0.31775	-0.326227
Q2G147_C90	Q2G147	GAVNMUCILEQDTSIYGDFQR	SAOUHSC_00308	Lipoate--protein ligase	no		no	1.55676								1.61424	1.49927
Q2G0S8_C209	Q2G0S8	DYQQLUQSLSNR	SAOUHSC_00466	Putative 4-diphosphocytidyl-2-C-methyl-D-erythritol kinase	no		no	1.33737		0.95349		0.250614		-0.990784		1.53719	1.13754	0.984553	0.922426	0.395282	0.105946	-1.15557	-0.826003
Q2G1H9_C2313	Q2G1H9	SLLEUVK	SAOUHSC_00144	Uncharacterized protein	no		no					1.48907		0.0476159						1.78203	1.1961	-0.172604	0.267835
Q2G0Q2_C310	Q2G0Q2	SIFPSUR	SAOUHSC_00497	Uncharacterized protein	no		no	1.77429		1.12524		-0.437395		-0.926067		1.78245	1.76613	0.90049	1.34999	-0.420067	-0.454723	-0.853605	-0.998529
Q2G1G5_C27	Q2G1G5	IIAAVGGMDNIDSVMNUMTR	SAOUHSC_00158	PTS system EIIBC component SAOUHSC_00158	no	Functional site	no	1.53568								1.74339	1.32797
Q2FYV5_C118	Q2FYV5	RLLDALLSUGEDFNAQLIALYNNSQGIPTK	SAOUHSC_01319	Aspartokinase	no		no	1.6872				-0.151853				1.48414	1.89025			0.0847446	-0.38845
Q2G1Y9_C38	Q2G1Y9	TFMCDDUK	SAOUHSC_01060	Uncharacterized protein	no		no	1.52598								1.62854	1.42342
Q2FV63_C13	Q2FV63	SQEILNVEGMSUGHCK	copZ	Copper chaperone CopZ	no	Functional site	no	2.62233		0.521482		-1.63548				2.18447	3.06019	0.372395	0.670568	-1.41823	-1.85272
Q2G198_C2	Q2G198	UTGFTIQTLNNQVLLGR	SAOUHSC_00247	Uncharacterized protein	no		no	1.50136								1.73751	1.2652
Q2FZV4_C50	Q2FZV4	QPFGYLHGGASIALGETAUSLGSANLIDTTK	SAOUHSC_00881	Uncharacterized protein	yes		no	0.292308		0.947845		0.346047		-0.0975653		0.442078	0.142538	0.95306	0.942629	0.296375	0.39572	-0.0201429	-0.174988
Q2FZ55_C55	Q2FZ55	HUSEKIEMEDEPVR	plsX	Phosphate acyltransferase	yes		no	0.987171		0.298425		0.19948				1.15043	0.823912	0.0648829	0.531968	0.11836	0.2806
Q2FXR3_C242	Q2FXR3	ELESDLKEGUDMMIVKPALSYLDIVR	hemB	Delta-aminolevulinic acid dehydratase	no		no	1.48239								1.49349	1.47129
Q2FXM8_C232	Q2FXM8	HSIVLVAEGCMTAQDUQK	pfkA	ATP-dependent 6-phosphofructokinase	yes		no					1.47813								1.59651	1.35975
Q2FV60_C69	Q2FV60	DVFTAUGK	crtN	Dehydrosqualene desaturase	no		no	1.47614								1.62471	1.32757
O52582_C16	O52582	IVVVGAVAGGATUASQIR	cdr	Coenzyme A disulfide reductase	no	Functional site	no	1.79539		-0.455216		0.0862815		0.0456224		1.9991	1.59168	-0.565417	-0.345015	0.158208	0.0143553	0.329296	-0.238051
Q2FXW5_C307	Q2FXW5	VIDAYAADPDNFKINPEWLIELDKUANR	SAOUHSC_01716	Uncharacterized protein	no		no	1.4623								1.09849	1.82611
Q2G1X6_C126	Q2G1X6	HIITGVUETDFSGYPDCR	queC	7-cyano-7-deazaguanine synthase	no		no					1.30201		0.155553						1.46514	1.13888	0.13606	0.175045
Q2FVT2_C86	Q2FVT2	QAFAGLPDLNQUETLVDYGNVYHDHEELIDTQK	hutG	Formimidoylglutamase	no		no	1.44082								1.66161	1.22002
Q2FWM0_C292	Q2FWM0	TIHYNYFEAGQUAMEEIQQMLK	SAOUHSC_02269	Sucrose operon repressor, putative	no		no	1.42176								1.75429	1.08923
Q2FV16_C275	Q2FV16	HLGGFPISGQFLAUTNPQVIEQHDAK	mqo	Probable malate:quinone oxidoreductase	no		no			1.11711		0.781597		-0.477061				1.07066	1.16356	0.832444	0.730749	-0.54848	-0.405643
Q2FV86_C123	Q2FV86	LUEDVAVYNHQIEK	SAOUHSC_02849	Pyruvate oxidase, putative	no		no	1.57983		0.886037		-0.274101		-0.776148		1.65727	1.50238	0.856233	0.915842	-0.262295	-0.285907	-0.718438	-0.833858
Q2G2R0_C63	Q2G2R0	VGEQVVSGNADLGVUICGTGVGINNAVNKVPGVR	lacB	Galactose-6-phosphate isomerase subunit LacB	no		no					1.21018		0.198552						1.1435	1.27686	0.260387	0.136716
Q2FVV9_C592	Q2FVV9	GHNNVQGUSDMGSMPDK	SAOUHSC_02582	Putative formate dehydrogenase SAOUHSC_02582	no		no	1.40509								1.53745	1.27274
Q2FY11_C168	Q2FY11	GIGFAPDSSHFUHDFLQK	dnaG	DNA primase	yes		no	2.03681				-0.635983				2.77602	1.2976			-0.50271	-0.769256
Q2FWJ6_C101	Q2FWJ6	FUNSIESYQQR	SAOUHSC_02296	Protein SprT-like	no		no	1.38669								1.35552	1.41787
Q2FV41_C158	Q2FV41	VNSLAYUSSK	SAOUHSC_02898	Uncharacterized protein	no		no	0.818559		0.573678		0.213938		-0.23083		0.922807	0.714311	0.550802	0.596554	0.214498	0.213378	-0.159364	-0.302297
Q2FVV7_C185	Q2FVV7	LVGAUGLDSMR	SAOUHSC_02584	Uncharacterized protein	no	Functional site	no	0.752227		0.618664						0.916706	0.587749	0.49334	0.743989
Q2G0Q1_C130	Q2G0Q1	DQFTVPFVCGUR	pdxS	Pyridoxal 5'-phosphate synthase subunit PdxS	no		no	0.885379		0.812322		0.0900949		-0.417083		0.922788	0.84797	0.565819	1.05882	-0.136875	0.317065	-0.782281	-0.0518853
Q2G2G2_C17	Q2G2G2	THLLIVDDEQDIVDIUQTYFEYEGYK	saeR	Response regulator SaeR	no		no	1.59714		0.71478		-0.337075		-0.606365		1.60914	1.58514	0.583327	0.846233	-0.290356	-0.383793	-0.635674	-0.577057
Q2FXW9_C234	Q2FXW9	IATVUKFDLPK	SAOUHSC_01711	Uncharacterized protein	no		no	0.505201		0.728765		0.337776		-0.213766		0.609755	0.400647	0.737514	0.720016	0.363003	0.312549	-0.0581425	-0.36939
Q2G1G2_C372	Q2G1G2	VVFIIDEUHR	SAOUHSC_00162	Type I restriction enzyme R Protein	no		no	1.47523		0.512771		0.0148357		-0.649703		1.70514	1.24531	0.574634	0.450908	-0.016191	0.0458623	-0.56902	-0.730387
Q2G1K2_C123	Q2G1K2	IPVFHMEAGNRUFDQNVPEEINRK	SAOUHSC_00120	UDP-N-acetylglucosamine 2-epimerase	no		no	1.35167								1.68057	1.02278
Q2FWL2_C287	Q2FWL2	QSLADQUK	tsaD	tRNA N6-adenosine threonylcarbamoyltransferase	yes		no	1.84451		0.803275		-0.0112278		-1.28788		1.95498	1.73405	0.747774	0.858777	0.0231844	-0.0456399	-1.25406	-1.32171
Q2FZ18_C438	Q2FZ18	SVUINGIITSILLNAKPHEVK	SAOUHSC_01253	Uncharacterized protein	no	Functional site	no			1.47876		0.465297		-0.614157				1.43221	1.52532	0.584289	0.346305	-0.589724	-0.638591
Q2FZT4_C200	Q2FZT4	SLTGGUPMGPYIVTK	SAOUHSC_00906	Uncharacterized protein SAOUHSC_00906	no		no	0.826236		0.85759		0.00976897		-0.371311		1.05154	0.600927	0.8837	0.83148	-0.00151057	0.0210485	-0.372433	-0.370188
Q2FZI7_C156	Q2FZI7	KUDIRPDDSKEQLEEK	purN	Phosphoribosylglycinamide formyltransferase	no		no	1.25285		0.983727		0.156841		-1.07458		1.48011	1.0256	0.770533	1.19692	0.190678	0.123004	-1.08458	-1.06459
Q2G1X7_C148	Q2G1X7	KLDEVITQUVPSSLNLK	queE	7-carboxy-7-deazaguanine synthase	no		no			1.77871		0.498998		-0.972385				1.53197	2.02545	0.446997	0.550999	-0.874349	-1.07042
Q2G2L7_C210	Q2G2L7	YRDLLKEUATEITEVEDK	SAOUHSC_02811	Uncharacterized protein	no		no	1.29865								1.2756	1.3217
Q2G2U5_C253	Q2G2U5	MSVGQVLNEHDIDTEKEVLLUDTDKAIPTPIYTI	SAOUHSC_00024	Uncharacterized protein	no		no	1.29796								0.953302	1.64261
Q2FY65_C230	Q2FY65	FLPGKHUAK	SAOUHSC_01600	Uncharacterized protein	no		no	1.50092				0.235412		-0.451445		1.5708	1.43103			0.171463	0.299362	-0.323895	-0.578995
Q2FWD5_C32	Q2FWD5	CNDUSAHFSDMK	SAOUHSC_02364	Uncharacterized protein	no		no	1.28461								1.37312	1.1961
Q2FV10_C380	Q2FV10	DGLFFEPTVITNUDTSMR	SAOUHSC_02933	Betaine aldehyde dehydrogenase	no		no	1.2679								1.31858	1.21723
P0A011_C276	P0A011	FNGVLUGR	lacD	Tagatose 1,6-diphosphate aldolase	no		no	1.38626		0.976235		-0.264705		-0.843331		1.38681	1.38571	0.835439	1.11703	-0.215161	-0.314248	-0.76901	-0.917652
Q2G280_C44	Q2G280	DNTPTUTTEACDFRDNLEMFNDLDVAVYGISGDSK	SAOUHSC_01999	Uncharacterized protein	no	Functional site	no	1.23737								0.95293	1.5218
Q2G280_C49	Q2G280	DNTPTCTTEAUDFRDNLEMFNDLDVAVYGISGDSK	SAOUHSC_01999	Uncharacterized protein	no	Functional site	no	1.23737								0.95293	1.5218
Q2FYV3_C36	Q2FYV3	LTLNEGNTPLIHUENMSK	SAOUHSC_01321	Threonine synthase	no		no	1.23412								1.3467	1.12155
Q2FZ86_C164	Q2FZ86	VGTDIFLUTPDNVEVAGSITDHIENMEHSFD	sepF	Cell division protein SepF	yes		no	1.21705		0.262593		-0.24894				1.38217	1.05193	0.35321	0.171975	-0.174166	-0.323715
Q2FZJ0_C32	Q2FZJ0	VUDILGR	purL	Phosphoribosylformylglycinamidine synthase subunit PurL	no		no			1.59568		0.393796		-0.773991			2.71419	1.58578	1.60559	0.397584	0.390007	-0.685826	-0.862156
Q2FVA1_C19	Q2FVA1	QLVDNUDLNFYLGQINHIVGK	SAOUHSC_02832	Uncharacterized protein	no		no	1.21329								1.06005	1.36653
Q2FYH6_C396	Q2FYH6	YGSVPHUGFGLGLER	asnS	Asparagine--tRNA ligase	no		no	1.22785		1.54551		-0.679347		-0.881705		1.32786	1.12784	1.57163	1.5194	-0.657992	-0.700702	-0.805635	-0.957775
Q2G0U0_C27	Q2G0U0	ENLEAATHUVTR	SAOUHSC_00437	Uncharacterized protein	no	Functional site	no	0.0708867		0.386141		0.679392		0.0712467		0.360113	-0.21834	0.0996075	0.672674	0.760203	0.598581	0.0780523	0.064441
Q2G0L8_C64	Q2G0L8	AFYEAQAPVADTDLTVPYIULNGAEVR	SAOUHSC_00542	Uncharacterized protein	no		no	1.36643		0.653854		-0.189632		-0.624243		1.63343	1.09943	0.472592	0.835116	-0.289122	-0.0901424	-0.64539	-0.603095
Q2G146_C76	Q2G146	LMFVEADLSQDEHWDEAMKDUK	SAOUHSC_00309	Uncharacterized protein	no		no	0.888704		0.304349						0.985719	0.791689	0.677801	-0.0691037
Q2G1J4_C92	Q2G1J4	SUDISLVMR	SAOUHSC_00128	Cap5O protein/UDP-N-acetyl-D-mannosaminuronic acid dehydrogenase	no		no	0.967317		0.222581						1.83891	0.0957219	-0.0756872	0.52085
Q2FZP0_C133	Q2FZP0	FPWLSANIEYNVTKEPYFSTPYUIK	SAOUHSC_00960	Uncharacterized protein	no		no	1.37558		0.134229				-0.327726		1.28623	1.46493	0.0867838	0.181675			-0.417367	-0.238085
Q2FY67_C215	Q2FY67	QGPVVAIFGDTKPUSNER	rnz	Ribonuclease Z	yes	Functional site	no			0.605421		0.559465		0.0145842				-0.219337	1.43018	0.236952	0.881978	-0.376171	0.405339
Q2G2A1_C48	Q2G2A1	IIAGGYNGSVAGEVHCIDEGULIEDGHCIR	SAOUHSC_01692	Uncharacterized protein	no		no					1.17105								1.22373	1.11836
Q2FZI6_C260	Q2FZI6	HMNPUGVGIGDTIEQAFQHAYEADSQSIFGGIVALNR	purH	Bifunctional purine biosynthesis protein PurH	no		no	1.17071								1.37484	0.966578
O05154_C69	O05154	HISLIQLQNASIATUINK	tagX	Putative glycosyltransferase TagX	no		no	1.88783						-0.718278		2.69492	1.08073					-0.707336	-0.72922
Q2FZC4_C55	Q2FZC4	GNUDFYPEFENEAVAK	SAOUHSC_01108	Phosphoesterase	no		no			1.166								1.1626	1.16941
Q2G0W0_C56	Q2G0W0	VUSTNEGLLNIK	SAOUHSC_00414	Uncharacterized protein	no		no	1.77704		0.0960504		-0.185791		-0.525206		1.94257	1.61152	-0.0246371	0.216738	-0.0449402	-0.326643	-0.533095	-0.517317
Q2G1T2_C7	Q2G1T2	MDNHNQUNYVNPQNVSLDWECFIISK	SAOUHSC_00826	Uncharacterized protein	no		no					1.14939								0.258459	2.04033
Q2FXP0_C268	Q2FXP0	VUGSQIETK	SAOUHSC_01796	Formamidopyrimidine-DNA glycosylase	no		no	-0.621586		1.73488		0.794243		-0.758353		-0.835291	-0.40788	1.59469	1.87507	0.603787	0.984699	-0.85598	-0.660726
O50581_C585	O50581	SDQQSYUVLIASPK	recG	ATP-dependent DNA helicase RecG	no		no	1.13991								1.12148	1.15834
Q2FZ31_C191	Q2FZ31	YDKGEAAYLNUPMTEDEFNR	trmFO	Methylenetetrahydrofolate--tRNA-(uracil-5-)-methyltransferase TrmFO	no		no	1.13622								1.09381	1.17862
Q2FXY5_C299	Q2FXY5	HYQLDELLNIIDAUAETDYK	SAOUHSC_01690	Uncharacterized protein	yes		no	1.12888								1.52822	0.729531
Q2FZ67_C325	Q2FZ67	ILVDAPUSGLGVMR	SAOUHSC_01184	16S rRNA (cytosine(967)-C(5))-methyltransferase	no	Functional site	no	0.924867		0.20195						1.15588	0.693855	0.188781	0.215119
Q2FY55_C142	Q2FY55	HQIEGHDVMNVINQLQTLFNKYUEER	SAOUHSC_01610	UPF0403 protein SAOUHSC_01610	no		no	1.12551								1.25363	0.997401
Q2FVE6_C63	Q2FVE6	NVKGEYETVVMAUTADAYYDTLQQLSLETLQSVK	SAOUHSC_02768	Uncharacterized protein	no		no	1.1217								1.16575	1.07765
Q2G1G6_C245	Q2G1G6	IIQEIUAITYDEAMALYQVSEHDVK	murQ	N-acetylmuramic acid 6-phosphate etherase	no		no	1.61457		0.88229		-0.15483		-1.23487		1.8088	1.42035	0.696528	1.06805	-0.172457	-0.137203	-1.42121	-1.04853
Q2FXH2_C159	Q2FXH2	GLAYVDEVAVNWUPALGTVLSNEEVIDGVSER	leuS	Leucine--tRNA ligase	yes		no	1.23687		0.753252		-0.329744		-0.561985		1.34948	1.12426	0.725523	0.780982	-0.326082	-0.333407	-0.552199	-0.571772
Q2FXH0_C52	Q2FXH0	DGTVAHGGUTFCSAAGSGDFAGNR	SAOUHSC_01877	Uncharacterized protein	no		no					1.16756		-0.0738732						1.22169	1.11343	0.0289934	-0.17674
Q2FVY1_C130	Q2FVY1	NEEELQVLQQLSNVUYSINVR	SAOUHSC_02541	Molybdopterin-guanine dinucleotide biosynthesis protein MobB	no		no	1.0376		0.388106		0.34773		-0.680965		1.2969	0.778293	0.261711	0.514501	0.319502	0.375957	-0.637962	-0.723968
Q2G2X0_C145	Q2G2X0	HEIMUTLEDCMIAAR	SAOUHSC_00457	Uncharacterized protein	no		no	1.03834								0.192194	1.88448
Q2G0M9_C254	Q2G0M9	QAVLSFGMIQAGTTDSVIPDQAFUK	SAOUHSC_00531	Uncharacterized protein	no		no			1.7185		0.167652		-0.849363				1.5591	1.8779	0.17645	0.158854	-0.659563	-1.03916
Q2FZF1_C47	Q2FZF1	NUGSYNGEEVAAK	rpmF	50S ribosomal protein L32	yes		no	0.791644		1.08997		0.117515		-0.962654		0.976657	0.606632	0.905043	1.27489	0.179001	0.0560285	-0.899426	-1.02588
Q2G2W8_C96	Q2G2W8	HGEDULFCLEVLSD	SAOUHSC_00456	Initiation-control protein YabA	no		no			1.91635		-5.07154e-05		-0.890685				1.95315	1.87955	0.0764223	-0.0765237	-0.925495	-0.855875
Q2G255_C7	Q2G255	IGITUYPSMGGSGIIATELGIK	SAOUHSC_01475	Uncharacterized protein	no		no			1.02468								1.1173	0.932061
Q2G090_C45	Q2G090	SIUYQVPGLLLGGTTIVISPLISLMK	SAOUHSC_00730	ATP-dependent DNA helicase RecQ	no		no	1.00997								1.10185	0.918081
P0A011_C85	P0A011	DUGLLLAYEK	lacD	Tagatose 1,6-diphosphate aldolase	no		no	1.41999		1.00517		-0.390786		-1.03069		1.54102	1.29895	0.920979	1.08936	-0.19598	-0.585591	-1.00955	-1.05183
Q2G2N9_C66	Q2G2N9	IIGLSGMUK	SAOUHSC_02248	Uncharacterized protein	no		no	0.999302								1.19043	0.808179
Q2FV86_C413	Q2FV86	FIISSWLGTMGUGLPGAIASK	SAOUHSC_02849	Pyruvate oxidase, putative	no		no	0.55041		0.924945		-0.0767519		-0.423762		0.691891	0.408929	0.91104	0.93885	0.0133551	-0.166859	-0.519052	-0.328471
Q9ZAH5_C311	Q9ZAH5	VUMDQTIVK	alr1	Alanine racemase 1	no	Functional site	no	0.227249		1.67054		0.0715898		-1.00764		0.359129	0.0953689	1.6987	1.64239	0.0951157	0.0480639	-0.901985	-1.11329
Q2G0I8_C234	Q2G0I8	ASDVIEHHNFEALADIFNEUHADLK	SAOUHSC_00577	Mevalonate kinase, putative	yes		no	1.3024		0.941304		-0.171634		-1.12545		1.40016	1.20464	0.867896	1.01471	-0.197137	-0.146132	-1.08835	-1.16256
Q2G2T7_C9	Q2G2T7	VVIPUFNEGEVITQTHQQLTEILSQDSSVK	SAOUHSC_00713	Uncharacterized protein	no		no	0.921727								0.983167	0.860287
Q2G0A0_C122	Q2G0A0	SUENYSHISVSGGLR	SAOUHSC_00705	Cys-tRNA(Pro)/Cys-tRNA(Cys) deacylase	no		no	1.32504				-0.404159				1.41539	1.23468			-0.379407	-0.428911
O50581_C305	O50581	TVVAAIUMYALK	recG	ATP-dependent DNA helicase RecG	no		no	0.918851								1.72067	0.11703
Q2FVV9_C37	Q2FVV9	SQDTFVPSIUYNESMGPIQTCDTCTVEIDGK	SAOUHSC_02582	Putative formate dehydrogenase SAOUHSC_02582	no	Functional site	no	0.787306				0.128248				1.08107	0.493545			0.373954	-0.117459
Q2FX05_C123	Q2FX05	VUDVATMAFENAIAK	map	Methionine aminopeptidase	yes		no	1.64524		-0.131783		-0.0656246		-0.54034		1.81496	1.47551	-0.369305	0.105739	0.0142124	-0.145462	-0.499443	-0.581238
Q2FZW0_C271	Q2FZW0	NVYVVGDUADLPHAPSAQLAEVQGDQIADVLK	SAOUHSC_00875	Uncharacterized protein	no		no	1.31865		0.781586		-0.4156		-0.77897		1.5115	1.12579	0.781745	0.781426	-0.368705	-0.462495	-0.689614	-0.868326
Q2FZC8_C44	Q2FZC8	SHSVUAQGGINGAVNTK	SAOUHSC_01104	Succinate dehydrogenase, flavoprotein chain TC0881, putative	no		no	1.9929		0.183965		-0.581427		-0.72297		1.97691	2.00888	0.207268	0.160662	-0.547236	-0.615619	-0.512864	-0.933077
Q2G072_C48	Q2G072	STLLSAIUR	SAOUHSC_00748	Uncharacterized protein	no		no			0.976256		0.399742		-0.512006				1.09119	0.86132	0.145873	0.65361	-0.523774	-0.500238
Q2G084_C36	Q2G084	NINQGIGEVTTALSSIUK	SAOUHSC_00736	Putative lipid kinase SAOUHSC_00736	no		no	0.915364		0.621472		0.00576169		-0.689931		1.07601	0.754717	0.498353	0.744592	0.0199154	-0.00839199	-0.645322	-0.734539
Q2G2R7_C14	Q2G2R7	FKUNSEAK	SAOUHSC_02129	Uncharacterized protein	no		no	1.74789						-0.899068		1.78073	1.71506					-0.902983	-0.895153
Q2FZ72_C34	Q2FZ72	TILVIGSGPIIIGQAAEFDYAGTQAULALK	carB	Carbamoyl-phosphate synthase large chain	no		no	1.18017		0.777407		-0.125067		-0.997109		1.08372	1.27662	0.943359	0.611456	-0.0222731	-0.227861	-1.06695	-0.927267
Q2FV76_C111	Q2FV76	EAUYAATPAIQLAK	SAOUHSC_02860	HMG-CoA synthase, putative	yes		no	1.54877		0.596107		-0.511249		-0.801414		1.70066	1.39687	0.263635	0.928579	-0.468691	-0.553807	-0.741276	-0.861552
Q2FZV8_C37	Q2FZV8	VNGGGUTGLTYGMGAEEAPGENDEVLEYFGLK	SAOUHSC_00877	Uncharacterized protein	no		no	0.805113								1.46383	0.146395
Q2G1E1_C7	Q2G1E1	VVIUDDER	SAOUHSC_00184	Uncharacterized response regulatory protein SAOUHSC_00184	no		no	0.793908								0.66821	0.919607
Q2FZ29_C169	Q2FZ29	VAADIUVFTNDNIVVETL	hslV	ATP-dependent protease subunit HslV	no	Functional site	no	-0.184891		0.541591		0.418865		0.0169632		-0.0646006	-0.305182	0.0919367	0.991245	0.522859	0.314871	0.0531113	-0.019185
Q2G0W1_C424	Q2G0W1	AQIAFUIDVR	SAOUHSC_00413	UPF0753 protein SAOUHSC_00413	no		no	1.37786		0.117952		-0.714629				1.56769	1.18802	0.310922	-0.0750184	-0.77554	-0.653718
Q2G1G8_C447	Q2G1G8	HLDAUITR	ptsG	PTS system glucose-specific EIICBA component	no	Functional site	no	0.423767		0.630077		0.487279		-0.77146		0.4728	0.374733	0.372395	0.887759	0.627233	0.347325	-0.632092	-0.910827
Q2FXV8_C675	Q2FXV8	QDMMELTHAYUTSIHK	recD2	ATP-dependent RecD-like DNA helicase	no		no	0.767209								0.909428	0.62499
Q2FX12_C8	Q2FX12	MVDVAFVULGNICR	ptpA	Low molecular weight protein-tyrosine-phosphatase PtpA	no	Functional site	no	-0.312409		1.10155		0.377432		-0.412493		-0.117374	-0.507444	1.18903	1.01407	0.336512	0.418352	-0.526598	-0.298389
Q2FUS3_C122	Q2FUS3	QPIVGUNNLEELLVLNAIHIPLHAGK	SAOUHSC_03028	Uncharacterized protein	no		no	0.739129								0.81032	0.667938
Q2G1D8_C414	Q2G1D8	ESYGDDYGIACUVSAMTIGK	pflB	Formate acetyltransferase	no	Functional site	no	0.737339								0.701948	0.77273
Q2G1W0_C172	Q2G1W0	SCLNDUYDK	SAOUHSC_02574	Uncharacterized protein	no		no	1.22917		1.83905		-0.985739		-1.34543		1.5422	0.916129	1.65252	2.02558	-0.905523	-1.06596	-1.3934	-1.29746
Q2FYI3_C81	Q2FYI3	KFELLIANIEQLSVEUHFK	SAOUHSC_01464	Uncharacterized protein	no		no			1.2602		0.0693601		-0.594935				0.892663	1.62775	-0.068904	0.207624	-0.619448	-0.570422
Q2FXU8_C217	Q2FXU8	HVTLQDAKDULQK	SAOUHSC_01734	Uncharacterized protein	no		no	1.28347		0.650906		-0.581768		-0.628911		1.41975	1.14718	0.477574	0.824238	-0.59305	-0.570486	-0.667447	-0.590376
Q2G002_C187	Q2G002	NDVLNLLQAMSTFSDTMDUK	aroD	3-dehydroquinate dehydratase	no		no	0.713718								1.01135	0.416083
Q2G0R9_C3	Q2G0R9	MKUIVGLGNIGK	pth	Peptidyl-tRNA hydrolase	yes		no	0.241721		0.470766						0.437441	0.046002	0.157949	0.783582
Q2FZ72_C281	Q2FZ72	ALGIEGGUNVQLALDPHSFDYYIIEVNPR	carB	Carbamoyl-phosphate synthase large chain	no	Functional site	no	0.9972		0.621872		-0.0608068		-0.84784		1.13245	0.861955	0.6072	0.636543	-0.0932325	-0.028381	-0.859745	-0.835935
Q2G1J7_C302	Q2G1J7	IADVUIASLIK	SAOUHSC_00125	Cap5L protein/glycosyltransferase, putative	no		no	0.700225								0.876487	0.523963
Q05615_C51	Q05615	PLLGEDUR	aroA	3-phosphoshikimate 1-carboxyvinyltransferase	no		no	0.688965		0.866475		-0.387302		-0.471719		0.9204	0.457529	0.752468	0.980483	-0.295151	-0.479454	-0.479412	-0.464027
Q2FV14_C191	Q2FV14	AVTHUHGWGFAHLQMAPK	SAOUHSC_02929	Acetyl-CoA synthetase, putative	no		no	0.764128		0.102549		0.248486		-0.423487		0.882369	0.645886	0.0511633	0.153935	0.274291	0.222681	-0.654922	-0.192052
Q2FYQ9_C63	Q2FYQ9	SICNUPHADGR	SAOUHSC_01376	Uncharacterized protein	no		no							0.690563								0.841893	0.539233
Q2FWK7_C121	Q2FWK7	EIIADAAETVINAHWFDGVFYIPNUDK	ilvD	Dihydroxy-acid dehydratase	no	Functional site	no					0.683103								0.600841	0.765365
Q2FZJ6_C140	Q2FZJ6	LYIDEQTFVPUTPLGIMEILK	folD	Bifunctional protein FolD	no		no			0.837187		0.0883289		-0.253675				0.659377	1.015	0.0951818	0.081476	-0.21932	-0.288029
Q2FZX4_C52	Q2FZX4	CPNIHEUWGAR	lipA	Lipoyl synthase	no	Functional site	no					0.671263								0.8024	0.540126
Q2G098_C322	Q2G098	GIYUGAIGLLLPTEDDKMIFNIPIR	SAOUHSC_00723	Uncharacterized protein	no		no			0.671196								0.307895	1.0345
Q2G1Q9_C4	Q2G1Q9	MITULFGSSR	SAOUHSC_00043	Uncharacterized protein	no		no	0.665481								0.765365	0.565597
Q2FY53_C281	Q2FY53	VLLVTEDNLEGSIMSEVSAIIAEHULFDLDAPIMR	SAOUHSC_01612	2-oxoisovalerate dehydrogenase, E1 component, beta subunit, putative	no		no	0.661077								0.781234	0.54092
Q2G1U0_C182	Q2G1U0	IQUIVEAEHLK	gmk	Guanylate kinase	yes		no	1.74301		0.424946		0.166659		-1.67401		1.94793	1.53808	0.484929	0.364964	0.197443	0.135875	-1.63439	-1.71364
Q2G0B8_C4	Q2G0B8	MIYUETER	SAOUHSC_00687	Uncharacterized protein	no		no	0.646218								0.70248	0.589955
Q2G0M6_C198	Q2G0M6	SNUGLGFK	araB	Ribulokinase	no		no	0.30033		0.165357		0.248938		-0.0691763		0.423955	0.176706	0.0332292	0.297485	0.156914	0.340961	-0.0766911	-0.0616615
Q2FX00_C94	Q2FX00	EAIEDGMPGLTIUGGYQFLGK	SAOUHSC_02106	Uncharacterized protein	yes		no	1.202						-0.566641		1.37329	1.03072					-0.41943	-0.713852
Q2FXN6_C65	Q2FXN6	DGIDVUK	SAOUHSC_01800	Two-component response regulator, putative	no		no	1.96175		0.240009		-0.716471		-0.856913		2.11537	1.80814	0.163756	0.316262	-0.725112	-0.707831	-0.766382	-0.947445
Q2FXQ4_C197	Q2FXQ4	FANUTQELTIEK	SAOUHSC_01781	Uncharacterized protein	no		no	0.974098				0.0111935		-0.360276		0.903732	1.04446			-0.180626	0.203013	-0.470249	-0.250303
Q2G1J4_C225	Q2G1J4	IUNNLNINVLDVIEMANK	SAOUHSC_00128	Cap5O protein/UDP-N-acetyl-D-mannosaminuronic acid dehydrogenase	no		no	0.614614								0.817362	0.411867
Q2FXH0_C40	Q2FXH0	VALDGGFDUPNRDGTVAHGGCTFCSAAGSGDFAGNR	SAOUHSC_01877	Uncharacterized protein	no		no					0.608353								0.578214	0.638491
Q2FXP0_C288	Q2FXP0	NSHYCPVUQK	SAOUHSC_01796	Formamidopyrimidine-DNA glycosylase	no		no	0.248778				0.348269				0.454492	0.0430645			0.583904	0.112633
Q05615_C326	Q05615	AIDELPVIALLUTQAVGTSTIK	aroA	3-phosphoshikimate 1-carboxyvinyltransferase	no		no	0.372759		0.940897		-0.304672		-0.414729		0.52717	0.218347	0.850399	1.0314	-0.263871	-0.345473	-0.4097	-0.419758
Q2G0C6_C216	Q2G0C6	EWYNDNLEQDYHATITVDQVATUK	SAOUHSC_00679	Uncharacterized protein	no		no	0.893813				-0.306482				1.01692	0.770702			-0.203053	-0.409911
Q2FZ04_C16	Q2FZ04	NNVKPNWUPGCGDFSVQAAIQK	SAOUHSC_01267	Uncharacterized protein	no		no					0.751421		-0.165303						0.849599	0.653243	-0.221371	-0.109234
Q2G0R0_C480	Q2G0R0	IUGLLGGR	ftsH	ATP-dependent zinc metalloprotease FtsH	no		no	1.25539		0.686068		-0.632038		-0.723766		1.44365	1.06712	0.672377	0.699759	-0.605141	-0.658935	-0.703432	-0.7441
Q2FZ03_C70	Q2FZ03	MVELEUPSIISQVK	SAOUHSC_01268	Uncharacterized protein	no		no	0.493238		0.179567		0.0796061		-0.173304		0.638584	0.347892	0.226755	0.132379	0.141433	0.0177794	-0.206928	-0.139681
Q2FXM2_C426	Q2FXM2	VASALVIUQMFDEV	SAOUHSC_01813	Uncharacterized protein	no		no	1.18114				-0.605668				1.46629	0.896001			-0.429459	-0.781876
Q2FV11_C478	Q2FV11	DGETALHPSUSAK	betA	Oxygen-dependent choline dehydrogenase	no	Functional site	no	0.163286		0.648745		0.141371		-0.37828		0.337779	-0.0112059	0.48725	0.810239	0.192937	0.0898054	-0.39233	-0.36423
P0A088_C59	P0A088	FHSEUGWPSFSK	msrB	Peptide methionine sulfoxide reductase MsrB	no		no	1.03185		0.179299		0.0165916		-0.661401		1.41392	0.649779	0.0462815	0.312317	-0.121659	0.154842	-0.556542	-0.766259
Q2FYR0_C12	Q2FYR0	FVFDIDGTLUFDGR	SAOUHSC_01375	Uncharacterized protein	no		no			1.39458				-0.833968				1.46326	1.3259			-0.840474	-0.827461
Q2G042_C214	Q2G042	ALYEALLQEDSTDIYALUHYTLLLYNTK	SAOUHSC_00784	Uncharacterized protein	no		no	0.553725								0.616264	0.491186
Q2G1K3_C138	Q2G1K3	WUKPNYNSVIATFCYK	SAOUHSC_00119	Capsular polysaccharide synthesis enzyme Cap8F	no		no	0.551563								0.715542	0.387583
Q2FXR7_C4	Q2FXR7	MNEUAFGTKDPVYLDYHDHVWGQPLYDSK	SAOUHSC_01768	Uncharacterized protein	no		no	0.549834								0.834711	0.264957
Q93T05_C283	Q93T05	FPIUYINIEMDPILVDVNVHPTK	mutL	DNA mismatch repair protein MutL	no		no	0.54974								0.690551	0.408929
Q2G1Z8_C97	Q2G1Z8	YFGHUIDQTALSPK	polC	DNA polymerase III PolC-type	yes		no	1.71006				-0.126585		-1.05633		2.01963	1.40048			0.0133551	-0.266524	-1.05406	-1.05859
Q2G039_C38	Q2G039	SLVIQCLEDMGYFUVDNLPPVLLPK	SAOUHSC_00787	Nucleotide-binding protein SAOUHSC_00787	no		no	1.06945						-0.563167		1.17453	0.964362					-0.529427	-0.596907
Q2G2D7_C242	Q2G2D7	VPVUGAISSYNHPEADIGPR	SAOUHSC_02447	Uncharacterized protein	no		no	0.632015		0.564706		-0.270134		-0.424162		0.780562	0.483468	0.534958	0.594453	-0.299969	-0.240299	-0.40463	-0.443693
Q2FWZ3_C411	Q2FWZ3	IVYISUNPATQQR	SAOUHSC_02113	RNA methyltransferase, TrmA family, putative	no	Functional site	no	3.45585				-1.05711		-1.89735		3.78628	3.12542			-1.34711	-0.767121	-1.97506	-1.81965
Q2FVA2_C105	Q2FVA2	QSIDQLVIUGLK	SAOUHSC_02831	Uncharacterized protein	no		no	0.698653		1.02053		-0.615322		-0.607935		0.839234	0.558072	1.29707	0.743989	-0.617432	-0.613211	-0.59826	-0.617609
Q2G1G0_C28	Q2G1G0	GLIGDUIQPIIEPIK	SAOUHSC_00164	Uncharacterized protein	no		no	1.08219						-0.592918		0.864969	1.29942					-0.667011	-0.518825
Q2FWL2_C259	Q2FWL2	AIQAUKEYGVQR	tsaD	tRNA N6-adenosine threonylcarbamoyltransferase	yes		no	0.197516		1.13793		0.458295		-1.32024		0.357158	0.0378742	1.08481	1.19106	1.28007	-0.363475	-1.25522	-1.38526
Q2G1B9_C229	Q2G1B9	IPEGLTFDHAFEUVGGR	tarJ	Ribulose-5-phosphate reductase 1	yes		no	1.24655		0.595421		-0.659136		-0.709848		1.40949	1.0836	0.563836	0.627006	-0.642406	-0.675866	-0.706299	-0.713397
Q2FYG5_C17	Q2FYG5	ALDVCUGTGDWTIALSK	SAOUHSC_01487	Menaquinone biosynthesis methyltransferase, putative	no		no	1.09885						-0.629081		1.01386	1.18384					-0.663305	-0.594857
P0A0B7_C39	P0A0B7	GSWSVVUFYPADFSFVCPTELEDLQNQYEELQK	ahpC	Alkyl hydroperoxide reductase C	no		no	0.028388		0.545265		0.0358195		-0.150762		0.158854	-0.102078	0.61306	0.47747	-0.208961	0.2806	0.0241778	-0.325702
Q2G295_C242	Q2G295	GNLPDAILUISDEEAIGIMHSAMDAGIK	SAOUHSC_01850	Catabolite control protein A	no		no	0.605913		0.566016		-0.713532				0.713651	0.498176	0.414022	0.71801	-0.800752	-0.626313
Q2FZ74_C178	Q2FZ74	AIVAHUEDNSLIYGGAMHEGK	pyrC	Dihydroorotase	no	Functional site	no	0.416914				0.0399134				0.659577	0.174251			-0.482452	0.562279
Q2FWA0_C541	Q2FWA0	GAHPUIISMEGLEK	glmS	Glutamine--fructose-6-phosphate aminotransferase [isomerizing]	yes		no	0.661829		0.0596837		0.0635279		-0.329097		0.777788	0.54587	-0.119542	0.238909	0.090447	0.0366088	-0.231413	-0.426781
Q2G149_C209	Q2G149	LADQHSLNHVAFUCISTGVFAFPQDEAAEIAVR	SAOUHSC_00306	Uncharacterized protein	no		no	0.797454						-0.342072		0.810237	0.784671					-0.483017	-0.201128
Q2FW81_C16	Q2FW81	YKQDHLUEYEK	SAOUHSC_02423	Probable uridylyltransferase SAOUHSC_02423	no		no	0.897669				0.08745		-0.53067		1.08332	0.712023			0.129876	0.0450235	-0.495837	-0.565503
Q2FZ59_C30	Q2FZ59	AVEUYGIVGMASR	SAOUHSC_01192	Uncharacterized protein	no		no	1.71779		0.435427		-0.708862		-0.994934		1.76035	1.67523	0.384602	0.486251	-0.596012	-0.821712	-0.959514	-1.03035
Q2FZW9_C233	Q2FZW9	EILAUGLDVLANEPIDHTHPLMGR	SAOUHSC_00866	D-isomer specific 2-hydroxyacid dehydrogenase, NAD binding domain protein	no		no	0.448258								0.420186	0.47633
Q2FV59_C44	Q2FV59	AVWAIYAVUR	crtM	Dehydrosqualene synthase	no	Functional site	no	0.44177								0.607579	0.275961
Q2G0B6_C11	Q2G0B6	THIIIDGDAUPVVDSIIDLTTETGIFVTIIR	SAOUHSC_00689	UPF0178 protein SAOUHSC_00689	no		no			0.441766								0.603881	0.27965
Q2G2G9_C101	Q2G2G9	EEISEQAISEVIEYUYR	recX	Regulatory protein RecX	no		no	-0.0131074		0.441667						0.0701145	-0.0963292	0.879157	0.00417776
Q2G1N2_C178	Q2G1N2	VFVYDQFSEAUAR	SAOUHSC_00076	Ornithine cyclodeaminase, putative	no		no	1.58452		0.651764		-0.391214		-1.41839		2.04404	1.12499	0.748891	0.554638	-0.351608	-0.43082	-1.42078	-1.416
Q2FVA7_C95	Q2FVA7	VYMAULTEK	SAOUHSC_02826	Uncharacterized protein	no		no	0.955002						-0.531578		1.03682	0.873183					-0.493804	-0.569351
Q2FZC4_C100	Q2FZC4	GLELGULFAFYGHTHVAK	SAOUHSC_01108	Phosphoesterase	no		no	1.24574						-0.825422		1.33845	1.15303					-0.839725	-0.811118
Q2G2R0_C7	Q2G2R0	IALGUDHIVTDTK	lacB	Galactose-6-phosphate isomerase subunit LacB	no		no	1.05168		1.31165		-0.772847		-1.17418		1.2461	0.857264	1.08631	1.537	-0.767904	-0.777789	-1.16249	-1.18587
Q53700_C72	Q53700	DYLEDDPEGFINFUHKR	cobB	NAD-dependent protein deacetylase	no		no	0.400976		0.532652		-0.525879				0.552082	0.24987	0.526369	0.538935	-0.39174	-0.660019
Q2FV11_C126	Q2FV11	GNPMDYEGWAEPEGMETWDFAHULPYFK	betA	Oxygen-dependent choline dehydrogenase	no		no	0.390009								0.568737	0.211282
Q2FVE5_C244	Q2FVE5	AIFNYPSQETAEDKWQUVNK	SAOUHSC_02769	Uncharacterized protein	no		no			1.16275		-0.0713762		-0.703214				1.31493	1.01057	-0.0336581	-0.109094	-0.618761	-0.787667
Q2G1C4_C38	Q2G1C4	QFDVTYNNVDIYGNHVIVRPLYLSIUAADQR	tarJ'	Ribulose-5-phosphate reductase 2	no	Functional site	no					0.679896		-0.294376						0.633571	0.726221	-0.229687	-0.359064
Q2G2R5_C49	Q2G2R5	ADALIEEGNNUIAEAHR	SAOUHSC_02451	PTS system lactose-specific IIA component, putative	no		no					0.383722								0.362105	0.405339
Q2FYZ7_C29	Q2FYZ7	MUVLLDMHIGHIK	SAOUHSC_01274	Glycerol uptake operon antiterminator regulatory protein	no		no	0.382425								0.411752	0.353097
Q2FYH6_C342	Q2FYH6	IKPFYMQPNPENEETVLUADLIAPEGYGEIIGGSER	asnS	Asparagine--tRNA ligase	no		no	0.788065		1.08493		-0.815773		-0.676053		0.921969	0.654161	1.30766	0.862193	-0.769994	-0.861552	-0.592897	-0.759209
Q2FYZ4_C405	Q2FYZ4	DYGLTFSPUNTK	glpD	Aerobic glycerol-3-phosphate dehydrogenase	no		no	1.19074		0.188602		-0.280352		-0.728908		1.27977	1.10172	0.147784	0.229419	-0.223325	-0.33738	-0.860322	-0.597495
Q2G2T4_C228	Q2G2T4	EHFDLNUYLTLLDVLDSHNIDR	SAOUHSC_00013	Uncharacterized protein	no		no	0.562832				-0.198005				0.395611	0.730053			-0.0121968	-0.383812
Q2G2A1_C91	Q2G2A1	QGVSTEGATIYVTHFPCLNUTK	SAOUHSC_01692	Uncharacterized protein	no	Functional site	no					0.398081		-0.035089						0.334111	0.462052	-0.00711558	-0.0630625
Q2G0I9_C35	Q2G0I9	YIDHSSGLEPMQSFAFDDTFUESVGK	lipL	Octanoyl-[GcvH]:protein N-octanoyltransferase	yes		no	0.352725								0.319965	0.385486
Q2G0S6_C103	Q2G0S6	SUVEVAR	SAOUHSC_00468	Uncharacterized protein	no		no	1.04387		0.254707		-0.396369		-0.552418		1.20945	0.878294	0.172103	0.337311	-0.153832	-0.638905	-0.491713	-0.613123
Q2FWC6_C17	Q2FWC6	DILINEUIYFASK	SAOUHSC_02372	Uncharacterized protein	no		no	0.348335								0.290896	0.405775
Q2G144_C7	Q2G144	ILVVUGHGLGSSFMVEMNAQEALR	SAOUHSC_00311	Uncharacterized protein	no		no	0.336803								0.516822	0.156785
Q2FZF1_C44	Q2FZF1	LSHRVUK	rpmF	50S ribosomal protein L32	yes		no	0.918032		0.992959		-0.248436		-1.32718		1.02311	0.81295	0.800496	1.18542	-0.0868984	-0.409973	-1.32995	-1.32441
Q2G084_C54	Q2G084	HLSIQLSENEGDIIKYUQEIK	SAOUHSC_00736	Putative lipid kinase SAOUHSC_00736	no		no	0.132611		0.503368		-0.0133564		-0.287878		0.272859	-0.00763761	0.212134	0.794603	0.148479	-0.175191	-0.212818	-0.362937
Q2G0Q8_C85	Q2G0Q8	IKPGDTIVEPTSGNTGIGLAFVUAAK	SAOUHSC_00488	Cysteine synthase	no		no	-0.885151		0.742814		0.563731		-0.099728		-0.764665	-1.00564	0.608904	0.876723	0.56988	0.557582	-0.141494	-0.0579622
Q2FZZ3_C61	Q2FZZ3	IDLNFYPQFUK	SAOUHSC_00841	Uncharacterized protein	no		no					0.319778								0.334111	0.305445
Q2FYV2_C285	Q2FYV2	SLNSQVVSUHSELVDINISGVK	thrB	Homoserine kinase	no		no	0.5934				-0.297419				0.962512	0.224287			-0.238953	-0.355885
Q2FZ72_C759	Q2FZ72	EIEVDAIUDGETVIIPGIMEHIER	carB	Carbamoyl-phosphate synthase large chain	no	Functional site	no	0.586666		-0.0589478		-0.244956				0.840751	0.33258	-0.153238	0.0353424	-0.0342194	-0.455693
Q2FZH5_C365	Q2FZH5	LULAQQDIFR	SAOUHSC_01029	Phosphoenolpyruvate-protein phosphotransferase	no		no	0.572575		0.0542179		-0.0127088		-0.333513		0.755913	0.389236	-0.150184	0.25862	0.126779	-0.152197	-0.184127	-0.4829
Q53700_C134	Q53700	FYCNVUHK	cobB	NAD-dependent protein deacetylase	no	Functional site	no					0.451517		-0.19449						0.487383	0.415651	-0.131124	-0.257856
Q2FXU4_C284	Q2FXU4	GLDYYTHTAFELMMDNPNYDGAITTLUGGGR	hisS	Histidine--tRNA ligase	yes		no	-0.0619496		0.317849						-0.00794222	-0.115957	-0.0448955	0.680594
Q2G1K2_C26	Q2G1K2	AUDQYFNQILVHTGQNYDYTLNQIFFDDLELR	SAOUHSC_00120	UDP-N-acetylglucosamine 2-epimerase	no		no	0.219106								0.311503	0.126709
Q2G0R0_C259	Q2G0R0	NAPUIIFIDEIDAVGR	ftsH	ATP-dependent zinc metalloprotease FtsH	no		no	0.463533		0.533738		-0.218137		-0.567887		0.658657	0.268408	0.493288	0.574187	-0.179289	-0.256985	-0.55634	-0.579435
Q2FV27_C67	Q2FV27	VLUSDSFGR	SAOUHSC_02912	Uncharacterized protein	no		no	0.704808		-0.112279		-0.18371		-0.202791		0.784253	0.625364	-0.186492	-0.0380656	-0.15719	-0.210229	-0.199603	-0.205979
Q2FXV8_C742	Q2FXV8	LTQLUTLLK	recD2	ATP-dependent RecD-like DNA helicase	no		no	0.692623		0.273339				-0.761817		1.00087	0.384381	0.407733	0.138945			-0.854283	-0.66935
Q2FXP5_C148	Q2FXP5	LDVAMAADDIUTAITNGEQVK	SAOUHSC_01791	Uncharacterized protein	yes		no			0.483905		-0.291868						0.563451	0.404358	-0.249548	-0.334189
Q2FZF6_C123	Q2FZF6	ENGIIVUEFSNHEEIDYQPFNMIK	SAOUHSC_01074	Uncharacterized protein	no		no	0.179439								0.327342	0.0315364
Q2FYK3_C289	Q2FYK3	TAGDUISDLGYPEALPEMVLLLDDPQK	cvfC	Conserved virulence factor C	no		no	0.163067								0.198924	0.12721
Q2FW59_C2	Q2FW59	UFDINNLDIK	SAOUHSC_02458	Uncharacterized protein	no		no			0.157046								0.102457	0.211635
Q2FXT9_C680	Q2FXT9	EGMLLUQHLSVKPDTLK	SAOUHSC_01744	Uncharacterized protein	no		no	0.151405								0.0040339	0.298776
Q2G2T8_C111	Q2G2T8	SIENLQTDYLDLFLIHWPUEADGLFLETYK	SAOUHSC_00712	Uncharacterized protein	no	Functional site	no	0.14806								0.69724	-0.40112
Q2FXV8_C236	Q2FXV8	AALLYTLEEEUIK	recD2	ATP-dependent RecD-like DNA helicase	no		no	0.74387		0.219585		-0.182271		-0.634581		0.891186	0.596554	0.154065	0.285106	-0.194311	-0.170232	-0.57934	-0.689823
Q2FZX9_C130	Q2FZX9	QVPVCUFTFGIPSEQIISR	SAOUHSC_00855	Probable nitronate monooxygenase	no		no					0.142743								0.123534	0.161952
Q2FXP5_C99	Q2FXP5	YLQCPUK	SAOUHSC_01791	Uncharacterized protein	yes		no	0.351075		0.621706		-0.423709		-0.42376		0.447315	0.254836	0.625925	0.617487	-0.391626	-0.455792	-0.262781	-0.584739
Q2G266_C428	Q2G266	SEYHHCPVILGSATPULESYAR	priA	Primosomal protein N'	yes		no	0.118128								0.36087	-0.124613
Q2G0E0_C63	Q2G0E0	YDGFYWUR	graR	Response regulator protein GraR	no		no	1.20815						-1.10641		1.3809	1.03541					-1.22263	-0.990194
Q2FUW3_C371	Q2FUW3	EUITSVNEEYQAK	asp1	Accessory Sec system protein Asp1	no		no					0.397503		-0.299387						0.572696	0.22231	-0.268382	-0.330393
Q2FZU5_C111	Q2FZU5	GGIVUDPR	SAOUHSC_00895	Glutamate dehydrogenase	no		no	1.36336		-1.22889		0.250621		-0.304836		1.45607	1.27065	-1.62527	-0.832514	0.341872	0.159371	-0.306555	-0.303116
Q2FV77_C366	Q2FV77	ASLELLNVESAQELGHVVAAVGLAQNFAAUR	SAOUHSC_02859	3-hydroxy-3-methylglutaryl coenzyme A reductase	yes		no	0.252231		0.459109		-0.105816		-0.5257		0.367483	0.136979	0.37829	0.539928	-0.112787	-0.0988454	-0.508773	-0.542626
Q2G0Q0_C145	Q2G0Q0	VGQGVDILUK	pdxT	Pyridoxal 5'-phosphate synthase subunit PdxT	no		no	0.468266		0.00754462		-0.105908		-0.305347		0.6054	0.331132	-0.0444045	0.0594937	-0.132673	-0.0791427	-0.230736	-0.379958
Q2FZ66_C127	Q2FZ66	HDYGNSVCVTTQVGUR	rlmN	Probable dual-specificity RNA methyltransferase RlmN	no	Functional site	no							0.0626299								0.0513025	0.0739573
Q53727_C456	Q53727	VTQEULNFYELIQSLIK	pcrA	ATP-dependent DNA helicase PcrA	yes		no	0.754578		0.278235		-0.410916		-0.563286		0.71444	0.794716	0.29876	0.25771	-0.486024	-0.335808	-0.653457	-0.473115
Q2FWH6_C207	Q2FWH6	LSQUHEDAK	SAOUHSC_02315	DNA-binding response regulator, putative	no	Functional site	no			1.39064		-0.443093		-0.88923				1.35383	1.42745	-0.394695	-0.49149	-0.737014	-1.04145
Q2FZW9_C181	Q2FZW9	DAEADFNATYVSFETLLAESDFIIUTAPLTK	SAOUHSC_00866	D-isomer specific 2-hydroxyacid dehydrogenase, NAD binding domain protein	no		no	0.60065		-0.119077		-0.220191		-0.206028		0.713608	0.487692	-0.251654	0.0134997	-0.285823	-0.154558	0.129876	-0.541933
Q2FY43_C228	Q2FY43	HIEIQIVGDSYGNVIHLGERDUTIQR	SAOUHSC_01623	Acetyl-CoA carboxylase, biotin carboxylase	yes		no	0.149576				0.683035		-0.782452		0.229588	0.0695647			0.930548	0.435522	-0.70099	-0.863914
Q2FV14_C266	Q2FV14	YQINVLUCTPTEYR	SAOUHSC_02929	Acetyl-CoA synthetase, putative	no		no	0.0475746								0.143785	-0.048636
Q2G2Y4_C180	Q2G2Y4	TSPSTETNTQQSFANUK	SAOUHSC_01918	Uncharacterized protein	no		no			0.614597				-0.57625				0.481506	0.747688			-0.519983	-0.632517
Q2FY27_C108	Q2FY27	EIFEQFVDUPVYVDNDANIAALGEK	SAOUHSC_01646	Glucokinase, putative	no		no	0.885835		0.836602		-0.615189		-1.07234		1.01678	0.754888	0.797345	0.875859	-0.576024	-0.654354	-0.996196	-1.14848
Q2FZT1_C7	Q2FZT1	MQPHLIULDLDGTLLNDNK	SAOUHSC_00909	Uncharacterized protein	no		no	0.0286751								0.101785	-0.0444342
Q2G007_C58	Q2G007	DYQDFLTNUQILIQNK	SAOUHSC_00821	Uncharacterized protein	no		no	1.46537		0.399342		-0.690691		-1.1497		1.52552	1.40523	0.316146	0.482539	-0.728072	-0.65331	-1.08103	-1.21836
Q2FZC5_C117	Q2FZC5	AQFVUVISMSGPDMETK	SAOUHSC_01107	dITP/XTP pyrophosphatase	no		no	-0.0772322		0.0846195						0.0765036	-0.230968	-0.0271162	0.196355
Q2FXL9_C164	Q2FXL9	EGVTEUEVVNHIEQTIK	SAOUHSC_01816	Uncharacterized peptidase SAOUHSC_01816	no		no			0.228344		0.159593		-0.385873				0.157561	0.299127	0.381616	-0.0624296	-0.516078	-0.255667
Q2FXL0_C149	Q2FXL0	VGLVTUMYVNNVTGQIQPIPQMAK	SAOUHSC_01825	Uncharacterized protein	no		no	0.000561425								0.455965	-0.454842
Q2FWB5_C68	Q2FWB5	VGDQVIFYQVQTDTGLLGUGEIISVETGAQNK	SAOUHSC_02383	Uncharacterized protein	no		no	0.194651		0.141312		-0.336002				0.19131	0.197991	0.100439	0.182184	-0.31883	-0.353174
Q2G1S2_C242	Q2G1S2	GLSYEEVUEQTTK	SAOUHSC_00462	Uncharacterized protein	no		no	1.43905		-0.570423		-0.498676		-0.377417		1.61471	1.2634	-0.755283	-0.385563	-0.524583	-0.472769	-0.538115	-0.216719
Q2FY13_C92	Q2FY13	LGDGLSVIQPEDVIDNITIUGMGGPLIAK	SAOUHSC_01661	Uncharacterized protein	yes		no	1.74552		0.750547		-1.35048		-1.1565		1.79327	1.69777	0.733354	0.76774	-1.27383	-1.42713	-1.03133	-1.28167
Q2FW56_C67	Q2FW56	NAGVSIESLIEFUR	SAOUHSC_02461	Transcriptional regulator, merR family, putative	no		no	0.509849		0.157506		-0.678608				0.658828	0.36087	0.0650208	0.249991	-0.71532	-0.641896
Q2FWF6_C119	Q2FWF6	TTMSIVFEUHIYTLR	SAOUHSC_02335	Uncharacterized protein	no		no	-0.0143653								0.0306892	-0.0594198
Q2G1B7_C42	Q2G1B7	TEFEVVVVDDUSTDQTLQIVEK	SAOUHSC_00228	Uncharacterized protein	no		no			-0.016355								-0.228436	0.195726
Q2G0U7_C6	Q2G0U7	CVULVEETADK	SAOUHSC_00429	MutT/nudix family protein, putative	no		no	0.518808		0.0103047		0.0515518		-0.602454		0.485633	0.551984	-0.0446872	0.0652966	0.113819	-0.0107156	-0.61127	-0.593637
Q2FZL5_C72	Q2FZL5	DDQNVSVIVLTGEGDLAFUSGGDQK	menB	1,4-dihydroxy-2-naphthoyl-CoA synthase	no		no	0.421578		0.696091		-0.117801		-1.02606		0.558166	0.284991	0.632828	0.759354	0.00633393	-0.241936	-1.03842	-1.01371
Q2G2X1_C173	Q2G2X1	WUELLLTNKPMALIGIIDLLK	SAOUHSC_00454	DNA polymerase III, delta prime subunit, putative	yes		no	-0.0353515								0.105678	-0.176381
Q2FY32_C71	Q2FY32	NLEFTCLQEUINTADIIATGGGIIESEEAFNFLK	aroK	Shikimate kinase	no		no							-0.0353845								0.052555	-0.123324
Q2FWZ9_C202	Q2FWZ9	YUPNCGR	SAOUHSC_02107	UDP-N-acetylmuramyl tripeptide synthetase, putative	yes		no	0.654448				-0.0156805		-0.677299		0.851039	0.457857			0.0401209	-0.0714819	-0.763832	-0.590767
Q2G0M1_C181	Q2G0M1	YDDWINSFNAUPVVR	SAOUHSC_00539	Uncharacterized protein	no		no	0.600598		0.280314		-0.311429		-0.61652		0.680525	0.520671	0.201786	0.358842	-0.269935	-0.352922	-0.559555	-0.673485
Q2FZV7_C199	Q2FZV7	ITUVEAAPK	SAOUHSC_00878	NADH dehydrogenase-like protein SAOUHSC_00878	no		no	0.818372		0.406139		0.067777		-1.35005		0.985326	0.651418	0.274168	0.53811	0.0523549	0.083199	-1.28166	-1.41844
Q2FY44_C75	Q2FY44	EDGIYIDVYUALK	SAOUHSC_01622	Uncharacterized protein	no		no	0.422999		0.646978		-0.287994		-0.845813		0.582363	0.263635	0.70496	0.588996	-0.0688162	-0.507173	-0.814895	-0.876731
Q2FUZ8_C187	Q2FUZ8	YSVLALGDQTYEFFUQAGKDVDVLLENLGAER	SAOUHSC_02947	Sulfite reductase [NADPH] flavoprotein alpha-component	no	Functional site	no					0.0183828		-0.0951108						-0.123638	0.160404	0.15782	-0.348041
Q2G0N5_C75	Q2G0N5	YKGMVUDR	rpoC	DNA-directed RNA polymerase subunit beta'	yes		no	0.255951		1.01765		-0.186663		-1.16816		0.315798	0.196103	0.880333	1.15497	-0.0183081	-0.355018	-1.02853	-1.30779
Q2G0N5_C62	Q2G0N5	IFGPTKDWECSUGK	rpoC	DNA-directed RNA polymerase subunit beta'	yes		no	-0.0813546								-0.0305898	-0.132119
P0A086_C15	P0A086	TKEYATLAGGCFWUMVKPFTSYPGIK	msrA2	Peptide methionine sulfoxide reductase MsrA 2	no	Functional site	no	0.0602437		-0.152142						0.311271	-0.190783	0.0760117	-0.380296
Q2FZV9_C8	Q2FZV9	MNPIVEFULSNMAK	SAOUHSC_00876	UPF0349 protein SAOUHSC_00876	no		no	-0.0920301								0.160533	-0.344593
Q2FY54_C389	Q2FY54	NMVNLUISIDHR	SAOUHSC_01611	Dihydrolipoamide acetyltransferase component of pyruvate dehydrogenase complex	no		no	-0.100886								-0.101273	-0.1005
Q2FWN8_C257	Q2FWN8	EISEEDANYASGLTAVUSIINGGK	SAOUHSC_02244	Uncharacterized protein	no		no	-0.069879		1.18366		-0.302645		-0.913995		0.0765591	-0.216317	1.02949	1.33783	-0.35862	-0.246669	-0.973837	-0.854153
Q2FZ58_C95	Q2FZ58	GFUKNIESESEINSK	SAOUHSC_01193	Uncharacterized protein SAOUHSC_01193	no		no	-0.114637								0.0419438	-0.271217
Q2FXI9_C1097	Q2FXI9	AUGIHMLVATQRPSVNVITGLIK	SAOUHSC_01857	Uncharacterized protein	no		no	-0.117993								-0.120498	-0.115488
Q2FZ74_C299	Q2FZ74	EALLEGLLDGTIDUIATDHAPHAR	pyrC	Dihydroorotase	no	Functional site	no	0.0889634		0.199586		0.00768885		-0.42866		0.0881089	0.0898179	-0.0221352	0.421307	0.00259452	0.0127832	-0.672616	-0.184705
Q2FXG1_C162	Q2FXG1	LTGAKPAGVIUEIMNDDGTMAK	ribBA	Riboflavin biosynthesis protein RibBA	no	Functional site	no	-0.135								-0.0100036	-0.259996
Q2G167_C193	Q2G167	AUIIVTHDER	SAOUHSC_00287	ABC transporter, ATP-binding protein, putative	no		no			0.761089		0.0118323		-0.910719				0.443501	1.07868	0.0040339	0.0196308	-0.805509	-1.01593
Q2G1M1_C155	Q2G1M1	IINATSQAGVEGNPGLSLYUSTK	SAOUHSC_00086	3-ketoacyl-acyl carrier protein reductase, putative	no		no	0.600522		0.57574		-0.535138		-0.781571		0.819096	0.381948	0.450063	0.701416	-0.543846	-0.526431	-0.744995	-0.818147
Q2FWK0_C82	Q2FWK0	GASILITGDNFGUGSSR	leuD	3-isopropylmalate dehydratase small subunit	no		no					0.319736		-0.46517						0.405339	0.234133	-0.422018	-0.508321
Q2G126_C92	Q2G126	HQQGQTDFETFUDEMAEAGIYK	SAOUHSC_00330	Uncharacterized protein	no		no	-0.0739568		-0.0760472		0.271605		-0.273692		0.165044	-0.312957	-0.26939	0.117296	0.190678	0.352533	-0.388374	-0.159009
Q2FXI6_C61	Q2FXI6	FMDIUIENGIMGIPSFLVYK	SAOUHSC_01860	Uncharacterized protein	no		no	-0.154952								0.0365136	-0.346418
Q2G2Q2_C93	Q2G2Q2	ISQHDIDYUIVVNFSSR	SAOUHSC_01249	Riboflavin biosynthesis protein	yes		no	-0.157673								-0.0745018	-0.240844
Q2G050_C213	Q2G050	VRGDVVEIFPASKEELUIR	SAOUHSC_00776	Excinuclease ABC, B subunit	no		no	-0.16137								-0.114379	-0.208361
Q2FVC3_C403	Q2FVC3	LQAALESDILUPFHYFGVTDYVHQGIKEDDVTK	SAOUHSC_02790	Uncharacterized protein	no		no	-0.166768								-0.0597054	-0.273831
Q2G2L2_C97	Q2G2L2	AHIDLDFPISVEQVILSGUYK	SAOUHSC_00637	Uncharacterized protein	no		no	0.50747		0.304748		-0.298178		-0.68415		0.615605	0.399335	0.336398	0.273098	-0.323083	-0.273273	-0.557157	-0.811143
Q2G218_C81	Q2G218	AGEYSDCHDADLVVIUAGAAQKPGETR	ldh1	L-lactate dehydrogenase 1	no	Functional site	no			-0.170408								-0.121361	-0.219455
Q2FYJ0_C43	Q2FYJ0	VYLQQYTUSFVGHFSAGK	SAOUHSC_01455	Uncharacterized protein	no		no	0.336648		0.24831		-0.0523623		-0.709722		0.498251	0.175045	0.203013	0.293606	-0.0112959	-0.0934286	-1.06299	-0.356458
Q2FY27_C178	Q2FY27	FKUNCGR	SAOUHSC_01646	Glucokinase, putative	no		no					0.438202		-0.617455						0.518233	0.358171	-0.773886	-0.461025
O05154_C10	O05154	FTIIIPTUNNEATIR	tagX	Putative glycosyltransferase TagX	no		no					-0.199623								-0.288206	-0.111041
Q2FY08_C230	Q2FY08	EFEQMELEFFUKPGEEIEWQNYWK	glyQS	Glycine--tRNA ligase	yes		no	0.202645		-0.410521						0.336327	0.0689641	-0.477412	-0.34363
Q2G2S7_C90	Q2G2S7	LQNEQIFVYVUHGNHDPLSSK	SAOUHSC_01975	Uncharacterized protein	no		no	-0.215874								-0.12833	-0.303419
Q2FYG6_C262	Q2FYG6	EFEEUIQIIR	SAOUHSC_01486	Heptaprenyl diphosphate syntase component II, putative	no		no	1.33291				-0.691782		-0.863909		1.64718	1.01863			-0.832359	-0.551205	-0.638703	-1.08911
Q2G0T3_C57	Q2G0T3	ELTYUSVCGHITENDPCYICEDKQR	recR	Recombination protein RecR	no		no			0.646787		-0.577012		-0.294803				1.05332	0.240253	-0.542269	-0.611755	-0.22016	-0.369445
Q2FUQ3_C274	Q2FUQ3	YUPSIEDK	mnmG	tRNA uridine 5-carboxymethylaminomethyl modification enzyme MnmG	yes	Functional site	no	1.45668		-1.49407				-0.195524		1.28463	1.62873	-1.47706	-1.51107			-0.0703453	-0.320702
Q2FZJ3_C196	Q2FZJ3	TETGQILLADEISPDTUR	purC	Phosphoribosylaminoimidazole-succinocarboxamide synthase	no		no	0.686055		0.168533		-0.414453		-0.688472		0.889558	0.482552	0.0794443	0.257621	-0.576847	-0.25206	-0.57434	-0.802604
Q2FY19_C131	Q2FY19	HKLEVYGVUESCQD	fur	Ferric uptake regulation protein	no		no							-0.264782								-0.346958	-0.182606
Q2G1Q4_C505	Q2G1Q4	NUESFSK	SAOUHSC_00049	Uncharacterized protein	no		no			0.567376		-0.23361		-0.600493				0.327132	0.807619	-0.147107	-0.320113	-0.562556	-0.638429
Q2FY32_C105	Q2FY32	NIIWLDUNIDIIYSR	aroK	Shikimate kinase	no		no							-0.266831								-0.566891	0.0332292
Q2FZ74_C224	Q2FZ74	DVLLAEAAGUHYHVCHVSTK	pyrC	Dihydroorotase	no		no	-0.750875		0.212906		0.17785		0.075001		-0.54145	-0.9603	-0.178355	0.604166	0.158337	0.197362	-0.21098	0.360982
Q2FV14_C267	Q2FV14	YQINVLCUTPTEYR	SAOUHSC_02929	Acetyl-CoA synthetase, putative	no		no	-0.285589								0.600841	-1.17202
Q2G235_C457	Q2G235	AUWDNKHK	SAOUHSC_02133	Nicotinate phosphoribosyltransferase	yes		no	-0.287645								-0.194675	-0.380615
Q2FXZ4_C304	Q2FXZ4	IISEQHDNGWVULVGQK	prmA	Ribosomal protein L11 methyltransferase	no		no	1.17388		1.05207		-1.03944		-1.47769		1.41305	0.934705	1.10862	0.995521	-1.00445	-1.07443	-1.47469	-1.48068
Q2G2L3_C103	Q2G2L3	IPGIELMDEULK	tarA	N-acetylglucosaminyldiphosphoundecaprenol N-acetyl-beta-D-mannosaminyltransferase	yes		no	-0.14325		0.156717		-0.307061				0.0282862	-0.314786	0.0650208	0.248413	-0.234822	-0.379301
Q2FXR7_C179	Q2FXR7	FLGPVTVFSFLEAAGLYDAHLQDUPSKPK	SAOUHSC_01768	Uncharacterized protein	no		no	-0.295885								0.08882	-0.68059
Q2FZ67_C256	Q2FZ67	HDHVLDAUSAPGGK	SAOUHSC_01184	16S rRNA (cytosine(967)-C(5))-methyltransferase	no		no			0.845138		-0.27783		-0.866394				0.65205	1.03823	-0.008929	-0.54673	-0.708727	-1.02406
Q2FZ74_C207	Q2FZ74	ELGIPGIPNIUESVQIAR	pyrC	Dihydroorotase	no		no	0.458938		0.142319		-0.34555		-0.557339		0.612548	0.305329	-0.160165	0.444803	-0.359323	-0.331776	-0.57879	-0.535888
Q2FZX5_C100	Q2FZX5	FIVTUSNVIDESGHLPNNIVSSYIK	SAOUHSC_00860	5-nucleotidase family protein	no		no	-0.303391								-0.0169061	-0.589876
Q2FZ22_C98	Q2FZ22	GTADYMGMLATVMNALALQDSLEQLDUDTR	pyrH	Uridylate kinase	yes		no	0.0930466		0.141297		-0.537886				0.252052	-0.0659591	0.14496	0.137635	-0.536273	-0.539499
Q2FZD9_C275	Q2FZD9	GKGUNVCK	pheS	Phenylalanine--tRNA ligase alpha subunit	yes		no	-0.0783451		0.767809				-0.993525		-0.0729986	-0.0836915	0.788101	0.747516			-0.811093	-1.17596
Q2G0M6_C439	Q2G0M6	VFAUGGIPK	araB	Ribulokinase	no		no	0.430726		0.373043		-0.17261		-0.935737		0.58323	0.278223	0.310456	0.435629	-0.0691189	-0.276101	-0.853501	-1.01797
Q2G1E6_C96	Q2G1E6	HVMUEKPMAK	SAOUHSC_00179	Uncharacterized protein	no		no	-0.308579								-0.196029	-0.421129
Q2G1W4_C308	Q2G1W4	NIVAAGLADQUEVQLAYAIGVAEPVSIAIDTFGTGK	metK	S-adenosylmethionine synthase	yes		no	1.20091		0.399577		-0.821394		-1.09119		1.25217	1.14965	0.351628	0.447526	-0.869913	-0.772875	-1.08085	-1.10154
Q2G1D8_C123	Q2G1D8	AAUEAYGYELDEETEK	pflB	Formate acetyltransferase	no		no	1.23796		-0.0767692		-0.558944		-0.918393		1.44015	1.03576	-0.217286	0.0637471	-0.589898	-0.527991	-0.838977	-0.997809
P69848_C278	P69848	FYGULFATVDGFNVK	moaA	GTP 3',8-cyclase	no	Functional site	no							-0.346749								0.0529723	-0.746471
Q2G159_C129	Q2G159	IFUMTLGTGIGGAYK	SAOUHSC_00296	ROK family protein	no		no	0.03572				-0.383434				0.198871	-0.127431			-0.309592	-0.457276
Q2FY69_C57	Q2FY69	TINVIPUDLNDLK	SAOUHSC_01596	Uncharacterized protein	no		no	0.522455		-0.0175815				-0.854615		0.89344	0.151469	0.00977712	-0.0449402			-0.923031	-0.786199
Q2FVE5_C108	Q2FVE5	LLDGQASTTGYFDNIEHUIDEEFGQCSIASNDK	SAOUHSC_02769	Uncharacterized protein	no		no							-0.350185								-0.226679	-0.473691
Q2G0T6_C46	Q2G0T6	SPUYNFELEVIAK	SAOUHSC_00441	Uncharacterized protein	no		no	0.383721		-0.111625		-0.0266577		-0.609205		0.448055	0.319387	-0.1588	-0.0644497	0.0287106	-0.082026	-0.654445	-0.563966
Q2G233_C17	Q2G233	GTFSYLAUR	SAOUHSC_02135	Uncharacterized protein	no		no	0.787617				-0.566562		-0.590884		0.842054	0.733181			-0.67206	-0.461065	-0.535792	-0.645977
Q2FVT0_C72	Q2FVT0	IUEINDVDHIDLAIDGADEVDPSLNIIK	rpiA	Ribose-5-phosphate isomerase A	yes		no	1.20981		0.153982		-0.535575		-1.20047		1.36171	1.0579	0.129217	0.178747	-0.393425	-0.677726	-1.19985	-1.20108
Q2FY40_C311	Q2FY40	LQVNNUVTVEPGVYIEGLGGIR	SAOUHSC_01626	Proline dipeptidase, putative	no		no	-0.639548		0.266212						-0.597256	-0.681839	0.328032	0.204391
Q2G112_C97	Q2G112	VFVTEVVUDSVQFLEPK	SAOUHSC_00349	Single-stranded DNA-binding protein	yes		no	0.213582		0.262776		-0.177922		-0.673089		0.409829	0.0173339	-0.156032	0.681584	-0.155788	-0.200055	-0.548833	-0.797345
Q2FZJ4_C90	Q2FZJ4	LLUEKYNIPQGYQAIQLLQDR	purK	N5-carboxyaminoimidazole ribonucleotide synthase	no		no			0.675422		-0.167099		-0.885998				0.758303	0.592541	-0.0219215	-0.312276	-0.838203	-0.933794
Q9ZAH6_C80	Q9ZAH6	HVAFNDIDUYNDELGKPK	acpS	Holo-[acyl-carrier-protein] synthase	yes		no	0.927636		0.340388		-0.673706		-0.981668		1.05735	0.797926	0.292311	0.388465	-0.671577	-0.675835	-0.914684	-1.04865
Q2FW16_C84	Q2FW16	FDENAUVIIR	rplN	50S ribosomal protein L14	yes		no	0.807632		0.387227		-0.343951		-1.24059		0.847356	0.767909	0.443291	0.331163	-0.389886	-0.298016	-1.30144	-1.17974
Q2FXI9_C974	Q2FXI9	SVUINSILMSLLYK	SAOUHSC_01857	Uncharacterized protein	no	Functional site	no	0.328542		0.0967689		-0.234059		-0.586835		0.454071	0.203013	0.139731	0.0538064	-0.211882	-0.256235	-0.530468	-0.643203
Q2G2E5_C451	Q2G2E5	LANUHDFIMQFDEGYDTLVGER	SAOUHSC_00647	Uncharacterized protein	no		no			-0.413793								-0.622687	-0.204898
Q2FWK6_C467	Q2FWK6	LANPDKTVVUFVGDGGFQMTNQEMALLPEYGLDVK	SAOUHSC_02282	Acetolactate synthase	no		no	-0.420453								-0.465221	-0.375684
Q2FVV9_C536	Q2FVV9	FAEEUAK	SAOUHSC_02582	Putative formate dehydrogenase SAOUHSC_02582	no		no	0.595105		0.319428		-0.414092		-0.931573		0.73223	0.457979	0.00547185	0.633385	-0.461104	-0.36708	-0.917842	-0.945304
P69848_C24	P69848	LSVTDRUNFR	moaA	GTP 3',8-cyclase	no	Functional site	no							-0.456786								-0.33268	-0.580893
Q2G0I9_C214	Q2G0I9	FKYPEIEPSUMASLETLLNK	lipL	Octanoyl-[GcvH]:protein N-octanoyltransferase	yes		no	0.58762				-1.04507				0.654894	0.520347			-0.926865	-1.16327
Q2FXB7_C98	Q2FXB7	IVULNESVDFSEINSVLSLVNLNVDK	SAOUHSC_01948	ABC transporter domain protein	no		no	1.31773		-0.201707		-0.466465		-1.10701		1.43934	1.19613	-0.372692	-0.0307224	-0.515563	-0.417367	-1.59588	-0.618141
Q2FWJ9_C312	Q2FWJ9	TVVUVISGGNNDINR	ilvA	L-threonine dehydratase biosynthetic IlvA	no	Functional site	no					-0.462631								-0.69129	-0.233973
Q2G0A6_C82	Q2G0A6	LTPYVMSYDDIISFUK	SAOUHSC_00699	Deoxyribodipyrimidine photolyase, putative	no		no	-0.465244								-0.475034	-0.455455
Q2FZD9_C267	Q2FZD9	LRPSYFPFTEPSVEVDVSUFK	pheS	Phenylalanine--tRNA ligase alpha subunit	yes		no			0.316724		-0.674553		-0.109049				0.314986	0.318461	-0.562708	-0.786398	0.155361	-0.373458
Q2G098_C295	Q2G098	NNTDLTQILTSLFPUGSITGAPK	SAOUHSC_00723	Uncharacterized protein	no		no							-0.469021								-0.372711	-0.565332
Q2FVW3_C171	Q2FVW3	VLYQGYTUFR	SAOUHSC_02579	Uncharacterized protein	no		no	0.443381		0.271799		-0.355868		-0.839335		0.531069	0.355693	0.283211	0.260387	-0.389772	-0.321964	-0.834082	-0.844588
Q2FWH4_C15	Q2FWH4	QIQSWIPUEIEDQFLNQEINGVTIDSR	murF	UDP-N-acetylmuramoyl-tripeptide--D-alanyl-D-alanine ligase	yes		no	0.558983		0.522256		-0.547278		-1.01968		0.633571	0.484396	0.52085	0.523662	-0.423623	-0.670934	-0.906981	-1.13239
Q2G1E6_C81	Q2G1E6	ALLKDDTIDVIHVCTPNDSHUEITVAGLHAGK	SAOUHSC_00179	Uncharacterized protein	no		no	-0.489068								-0.053928	-0.924207
Q2FW37_C156	Q2FW37	AAQQFIGTHDFTGFUSQK	truA	tRNA pseudouridine synthase A	no		no	0.608127		0.309689		-0.770613		-0.638403		0.847344	0.368909	0.0149265	0.604451	-0.817759	-0.723467	-0.716078	-0.560728
Q2G0G1_C34	Q2G0G1	ALKPGEALVQTEYUGVCHTDLHVK	adh	Alcohol dehydrogenase	no	Functional site	no			-0.11647				-0.390736				-0.192266	-0.040675			-0.1031	-0.678372
Q2FW16_C41	Q2FW16	TANIGDVIVUTVK	rplN	50S ribosomal protein L14	yes		no	0.687881		0.365855		-0.283656		-1.27968		0.732928	0.642835	0.319895	0.411816	-0.295872	-0.27144	-1.38876	-1.17059
Q2FZ82_C906	Q2FZ82	CWNYSEDLGAVDELTHLUPR	ileS	Isoleucine--tRNA ligase	yes	Functional site	no	-0.944135		0.497271		-0.0644618				-0.552389	-1.33588	0.369271	0.62527	0.0040339	-0.132958
Q2G0Y7_C326	Q2G0Y7	VVAGVGVPQITAIYDUATEAR	guaB	Inosine-5'-monophosphate dehydrogenase	no		no	0.294367		-0.143432		-0.253627		-0.421946		0.448478	0.140255	-0.255891	-0.030973	-0.11299	-0.394263	-0.409527	-0.434364
Q2FXB7_C50	Q2FXB7	IIUGILQQDSGEIK	SAOUHSC_01948	ABC transporter domain protein	no		no	1.37228		0.851036		-1.01688		-1.73328		1.53854	1.20602	0.470823	1.23125	-0.896684	-1.13708	-1.71544	-1.75113
Q53700_C131	Q53700	FYUNVCHK	cobB	NAD-dependent protein deacetylase	no	Functional site	no			1.14163		-0.62893		-1.0446				0.860605	1.42266	-0.692315	-0.565545	-1.01034	-1.07887
Q2FY54_C72	Q2FY54	VTAEVPSTISGTITEILVEAGQTVAIDTIIUK	SAOUHSC_01611	Dihydrolipoamide acetyltransferase component of pyruvate dehydrogenase complex	no		no	-0.519348		-0.0194521						-0.389149	-0.649548	-0.239157	0.200253
Q2G1N7_C61	Q2G1N7	IVSDLUYK	sarS	HTH-type transcriptional regulator SarS	no	Functional site	no	0.802152		0.189486		-0.66006		-0.881916		0.982218	0.622087	-0.0305013	0.409472	-0.722515	-0.597605	-0.852014	-0.911817
Q2G0T0_C121	Q2G0T0	EAVENHLQDUEK	rsmA	Ribosomal RNA small subunit methyltransferase A	no		no	-0.557849								-0.27432	-0.841379
Q2G0C7_C109	Q2G0C7	TVDLULDVLALPSGEYELVDEDDLMFALESEQITK	SAOUHSC_00678	Uncharacterized protein	no		no					-0.247289		-0.326085						0.16633	-0.660908	-0.610455	-0.0417141
Q2FXL3_C93	Q2FXL3	WUASAGLDNVITLSDHR	tpx	Thiol peroxidase	no		no	1.42157		-0.533157		-0.40215		-1.06043		1.46153	1.38162	-0.721611	-0.344703	-0.315504	-0.488795	-1.01322	-1.10765
Q2FWM4_C93	Q2FWM4	IIDULETAHTR	SAOUHSC_02265	Accessory gene regulator protein A	no		no	1.6448		0.725871		-0.917161		-2.04258		1.75305	1.53655	0.703367	0.748375	-0.917788	-0.916535	-2.04561	-2.03955
Q2G132_C120	Q2G132	YUFEELDLNR	SAOUHSC_00324	Ribosomal-protein-serine acetyltransferase, putative	no		no	-0.590319								-0.44845	-0.732189
Q2FZW0_C104	Q2FZW0	IDYDELIIGLGUEDK	SAOUHSC_00875	Uncharacterized protein	no		no					-0.599858								-0.497669	-0.702046
Q2FZ61_C7	Q2FZ61	MHINLLUSDR	SAOUHSC_01190	Uncharacterized protein	yes		no	-0.321381		-0.278842						-0.174849	-0.467912	-0.265032	-0.292652
Q2G0M9_C348	Q2G0M9	VRPGAFFLTGUGNESK	SAOUHSC_00531	Uncharacterized protein	no		no	0.18378		0.835668		-0.576073		-1.06085		0.338567	0.0289934	0.700262	0.971074	-0.46337	-0.688776	-1.16628	-0.955424
Q2FYH2_C129	Q2FYH2	MADUSLQSGNYSDAIR	SAOUHSC_01480	Uncharacterized protein	no		no	0.314802		-0.181244		-0.793616				0.514703	0.1149	-0.214023	-0.148465	-0.677218	-0.910014
Q2FXR2_C79	Q2FXR2	TAQYUESLGIR	SAOUHSC_01773	Uroporphyrinogen-III synthase, putative	no		no	0.586668		-0.237005		-0.274725		-0.738803		0.919226	0.25411	-0.145956	-0.328055	-0.00385715	-0.545592	-0.781206	-0.6964
Q2FXI6_C27	Q2FXI6	QGATVFEFTAGWUPDCR	SAOUHSC_01860	Uncharacterized protein	no		no			1.95973		-2.62802						2.03657	1.88288	-2.53818	-2.71786
Q2FZY5_C371	Q2FZY5	AGHHUAQPLMK	SAOUHSC_00849	Cysteine desulfurase	yes		no	0.30688		-0.0460037		-0.328029		-0.602877		0.436162	0.177599	-0.0913869	-0.000620492	-0.292193	-0.363865	-0.522178	-0.683576
Q2FZ67_C211	Q2FZ67	LQDEGYDVEKDHDLPYULHIGGQPIIHSR	SAOUHSC_01184	16S rRNA (cytosine(967)-C(5))-methyltransferase	no		no	0.0658752		0.897038		-0.30764		-1.33487		0.462052	-0.330302	0.765789	1.02829	-0.103364	-0.511917	-0.808665	-1.86108
Q2FXM8_C226	Q2FXM8	HSIVLVAEGUMTAQDCQK	pfkA	ATP-dependent 6-phosphofructokinase	yes	Functional site	no					-0.679911								-0.514017	-0.845806
Q2FVC1_C536	Q2FVC1	LYVSLKUPNFDDVAQK	pgcA	Phosphoglucomutase	no		no	0.228035		0.136807		-0.277846		-0.767704		0.480058	-0.0239884	0.0842004	0.189413	-0.481646	-0.0740461	-0.710708	-0.824699
Q2FVV7_C139	Q2FVV7	GEGAFUNGIK	SAOUHSC_02584	Uncharacterized protein	no		no	0.563337		0.26041		-0.671595		-0.85042		0.740194	0.38648	0.403922	0.116897	-0.862257	-0.480933	-0.941753	-0.759087
Q2G089_C38	Q2G089	HVAVDNISFNINEGEFFVLIGPSGUGK	SAOUHSC_00731	ABC transporter domain protein	no	Functional site	no	-0.711251								-0.624488	-0.798015
Q2G0M7_C190	Q2G0M7	FIVTLUHGPAALLSAGLNR	hchA	Protein/nucleic acid deglycase HchA	no	Functional site	no	-2.0369		1.18743		0.509218		-0.372704		-1.96145	-2.11235	0.849038	1.52582	0.450697	0.56774	-0.375347	-0.370061
Q2FVV6_C147	Q2FVV6	FDDTQHMTLPMLFSDILIYUTER	SAOUHSC_02585	Uncharacterized protein	no		no	-0.221723		0.0335147		-0.531522				-0.0437351	-0.399711	-0.110059	0.177089	-0.556139	-0.506906
Q2G1C1_C384	Q2G1C1	IUQTIFK	tarF	Teichoic acid glycerol-phosphate transferase	yes		no	0.413146		0.452951		-0.588823		-0.998879		0.587749	0.238542	0.364684	0.541217	-0.612549	-0.565097	-0.891322	-1.10644
Q2G0A9_C58	Q2G0A9	GITTMDHADIYGDYQUESLFGNALDLSPELR	SAOUHSC_00696	Uncharacterized protein	no		no	-0.723417								-0.553638	-0.893196
Q2G178_C100	Q2G178	DLFKEEDLEPWTSUEFDFTR	SAOUHSC_00269	Uncharacterized protein	no		no	-0.728962								-0.525123	-0.932802
Q2FXM6_C55	Q2FXM6	ELAENLNVCFNUDHHIALTAYK	accD	Acetyl-coenzyme A carboxylase carboxyl transferase subunit beta	yes	Functional site	no					-0.731293								-0.637581	-0.825006
P95689_C353	P95689	EISSUSNCTDFQAR	serS	Serine--tRNA ligase	yes	Functional site	no	0.134626		-0.0956917		-0.434357		-0.33854		0.0364682	0.232784	-0.204881	0.013498	-0.383699	-0.485014	-0.183966	-0.493114
Q2G2V3_C99	Q2G2V3	SIDVQLIFUTLPLELR	menE	2-succinylbenzoate--CoA ligase	no		no	0.0739106		0.557587		-0.564816		-0.816984		0.159758	-0.0119371	0.430713	0.68446	-0.515604	-0.614028	-0.798291	-0.835677
Q2G1T1_C150	Q2G1T1	YULKLDEALK	SAOUHSC_00827	Uncharacterized protein	no		no	-0.760122								-0.627449	-0.892794
Q2G1G2_C219	Q2G1G2	INTLQSFAESFMRPUQLAK	SAOUHSC_00162	Type I restriction enzyme R Protein	no		no	1.48951		-0.650089		-1.60193				1.56764	1.41137	-0.595947	-0.70423	-1.54806	-1.65581
Q2FZ55_C92	Q2FZ55	SGEADGUVSAGNTGALMSAGLFIVGR	plsX	Phosphate acyltransferase	yes		no	0.393336		-0.241621		-0.327748		-0.595282		0.507617	0.279055	-0.338579	-0.144664	-0.338141	-0.317355	-0.785055	-0.405509
Q2FW32_C265	Q2FW32	SYNULKR	rpoA	DNA-directed RNA polymerase subunit alpha	yes		no	0.445447		-0.463009		-0.0226688		-0.73287		0.680504	0.210389	-0.672727	-0.253292	-0.13741	0.0920721	-0.691336	-0.774404
Q2G0T9_C257	Q2G0T9	QTFGNTDMMTIGEMSSTTIENUIK	SAOUHSC_00438	Alpha amylase family protein, putative	no		no	-0.773772								-0.616724	-0.93082
Q2FVG5_C47	Q2FVG5	WMHPUYTLNNK	SAOUHSC_02747	Uncharacterized protein	no		no	-0.792189								-0.669345	-0.915033
Q2FZ54_C144	Q2FZ54	GQLMAQAFPTGVGSMAAVLGLDFDKVDEIUK	SAOUHSC_01198	Malonyl CoA-acyl carrier protein transacylase	yes		no	-0.705687		-0.0910061						-0.59407	-0.817304	-0.245437	0.0634253
Q2G059_C138	Q2G059	EAVPUIVTLNYDQTGK	SAOUHSC_00763	Uncharacterized protein	no		no	-0.283407				-0.517039				-0.196492	-0.370322			-0.672681	-0.361398
Q2G1C2_C372	Q2G1C2	YUEKHNAVVLFK	tarK	Teichoic acid ribitol-phosphate polymerase TarK	no		no	-0.804368								-0.43154	-1.1772
Q2FWD4_C376	Q2FWD4	AGAULIIAGLIAEGVTTIYNVK	murA	UDP-N-acetylglucosamine 1-carboxyvinyltransferase	no		no	0.373643		0.0797548		-0.582799		-0.691479		0.528071	0.219215	-0.080988	0.240498	-0.56009	-0.605508	-0.648779	-0.734179
P31337_C186	P31337	LKEUGLILGIDLLDHIIIGDNR	SAOUHSC_01763	UPF0758 protein SAOUHSC_01763	no		no							-0.834329								-0.786646	-0.882012
Q2G095_C177	Q2G095	KUGIVTTDTINDWLVIGYTPLSLFNPK	SAOUHSC_00726	Uncharacterized protein	no		no	-0.376664				-0.465741				-0.237166	-0.516161			-0.355092	-0.57639
Q2FXM9_C144	Q2FXM9	EVKUDILNSGELK	pyk	Pyruvate kinase	yes		no	0.726116		0.191939		-0.154115		-1.62463		0.937235	0.514997	-0.0630392	0.446917	-0.195157	-0.113074	-1.80312	-1.44613
Q2G0I7_C271	Q2G0I7	MHATNLGSTPPFTYLVQESYDVMALVHEUR	SAOUHSC_00578	Diphosphomevalonate decarboxylase	yes		no	-0.866812								-0.834467	-0.899157
Q2FUS8_C135	Q2FUS8	STGGIFAATENGDNLQDIIEDLSTAYUIDDMVFDSK	drp35	Lactonase drp35	no	Functional site	no	-0.880216								-0.885606	-0.874825
Q2FYH8_C94	Q2FYH8	LUQSLIDQFNGEIPQTHK	nth	Endonuclease III	no		no							-0.883214								-1.34139	-0.425036
Q2G1C2_C10	Q2G1C2	IDGNTFIUR	tarK	Teichoic acid ribitol-phosphate polymerase TarK	no		no	-0.884922								-0.570357	-1.19949
Q2G2R0_C117	Q2G2R0	IIGELLMUDIIDAFINAEYKPTEENKK	lacB	Galactose-6-phosphate isomerase subunit LacB	no		no	0.712994		0.318932		-0.689211		-1.23922		0.964879	0.461109	0.523763	0.1141	-0.672382	-0.706041	-0.999567	-1.47887
Q2FZM7_C225	Q2FZM7	DSKDSIMIUDGPGSFPK	SAOUHSC_00973	Uncharacterized protein	no		no	-0.899419								-1.29488	-0.503957
Q2FWX9_C244	Q2FWX9	FTNAGQTUVAPDYILVHESVKDDLITALSK	SAOUHSC_02142	Aldehyde dehydrogenase	no	Functional site	no	-1.52213				1.00358		-0.381984		-1.47149	-1.57278			1.03506	0.972104	-0.44778	-0.316187
Q2G1U6_C10	Q2G1U6	MVTLFTSPSUTSCR	spxA	Regulatory protein Spx	yes		no	-0.906615								-0.833259	-0.979971
Q2FXI2_C93	Q2FXI2	IIUNDAIELNEYFKDGEVSR	trmB	tRNA (guanine-N(7)-)-methyltransferase	no	Functional site	no					-0.913277								-0.555057	-1.2715
Q2G1G7_C103	Q2G1G7	CULNASIISR	SAOUHSC_00156	Uncharacterized protein	no		no	-0.0652355		0.512777		-0.69192		-0.671096		-0.083982	-0.0464889	0.686075	0.339479	-0.640996	-0.742845	-0.80435	-0.537843
Q2FZ74_C357	Q2FZ74	NGDWTLQQLVDYLTIKPUETFNLEYGTLK	pyrC	Dihydroorotase	no		no			-0.432146		-0.116749		-0.366674				-0.43528	-0.429013	-0.195996	-0.0375028	-0.496488	-0.23686
Q2G121_C267	Q2G121	LIGGUCGTTPEHIK	SAOUHSC_00339	Uncharacterized protein	no	Functional site	no					-0.933475								-0.741565	-1.12538
Q2G0P5_C311	Q2G0P5	GELQUIGATTLDEYR	clpC	ATP-dependent Clp protease ATP-binding subunit ClpC	no		no	0.056072		0.118262		-0.405556		-0.712981		0.245972	-0.133828	-0.127446	0.363969	-0.435222	-0.37589	-0.760075	-0.665888
Q2G1P6_C326	Q2G1P6	TLKEANLDFGVEMUEPQPPSEDFAYYAK	SAOUHSC_00057	Uncharacterized protein	no		no	-0.948071								-0.546098	-1.35004
Q2FZ87_C114	Q2FZ87	IKUFLQVNVSGEASK	SAOUHSC_01153	Pyridoxal phosphate homeostasis protein	no		no	-0.948151								-0.546625	-1.34968
Q2G0T3_C83	Q2G0T3	SVIUVVEDDKDVIAMEK	recR	Recombination protein RecR	no		no	-0.958334								-0.715225	-1.20144
Q2FUR8_C69	Q2FUR8	GGFUYELNTFFK	SAOUHSC_03034	Uncharacterized protein	no		no	-0.809217		0.412269		-0.152877		-0.42408		-0.543688	-1.07475	0.0810669	0.743472	0.14978	-0.455534	-0.407191	-0.440968
Q2G2R7_C53	Q2G2R7	FILSTSDDSDYIUK	SAOUHSC_02129	Uncharacterized protein	no		no	0.398622		-0.0411755		-0.269764		-1.06706		0.53963	0.257614	-0.125415	0.0430645	-0.270121	-0.269408	-0.995391	-1.13873
Q2G046_C406	Q2G046	YMTELPUETCHGK	uvrA	UvrABC system protein A	no		no	-0.982754								-0.724135	-1.24137
Q2FUX1_C239	Q2FUX1	LISQSUIK	SAOUHSC_02974	Uncharacterized protein	no		no							-0.996819								-1.07942	-0.914222
Q2FYW6_C160	Q2FYW6	SELEELUK	SAOUHSC_01307	Uncharacterized protein	no		no	-1.01018								-0.797263	-1.2231
Q2G2D0_C679	Q2G2D0	GYEUGITIENYNDLK	infB	Translation initiation factor IF-2	yes		no	0.926454		0.410931		-0.828842		-1.52446		1.06836	0.784546	0.307466	0.514395	-0.938516	-0.719167	-1.52853	-1.5204
Q2G229_C64	Q2G229	AGNTTFLCGVNDDRVDEILSVINQTUGNR	SAOUHSC_00452	Uncharacterized protein	no		no	0.626045		0.0118405		-0.854576		-0.802395		0.831796	0.420294	-0.0192435	0.0429244	-0.864097	-0.845054	-0.760773	-0.844018
Q2FVY0_C386	Q2FVY0	SGAVVAIAHANUMVMLPGGSR	SAOUHSC_02542	Molybdopterin biosynthesis protein moeA, putative	no		no	-1.04524								-0.914875	-1.1756
Q2G1E6_C34	Q2G1E6	VENVEMIAFUDVDISK	SAOUHSC_00179	Uncharacterized protein	no		no	-1.04903								-0.925686	-1.17238
Q2G263_C42	Q2G263	EIQIGKYPSGHALPTEKELUAR	SAOUHSC_00096	Transcriptional regulator, GntR family, putative	no	Functional site	no	0.158433		-0.36782		-0.842827				0.208642	0.108223	-0.384584	-0.351056	-1.17244	-0.513214
Q2FZW9_C276	Q2FZW9	DNMIQLUINNIEAVMTNQVPHTPVN	SAOUHSC_00866	D-isomer specific 2-hydroxyacid dehydrogenase, NAD binding domain protein	no		no	-0.0224644		-0.526059		-0.512461				0.08882	-0.133749	-0.735572	-0.316546	-0.459675	-0.565246
Q2FV63_C16	Q2FV63	SQEILNVEGMSCGHUK	copZ	Copper chaperone CopZ	no	Functional site	no	0.241773		0.495452		-0.652583		-1.1583		0.481816	0.0017302	0.361432	0.629473	-0.513708	-0.791458	-1.2285	-1.0881
Q2FZP0_C456	Q2FZP0	VTMTDYUYR	SAOUHSC_00960	Uncharacterized protein	no		no	-1.07607								-1.11923	-1.03292
Q2G0W4_C374	Q2G0W4	ELDAULVNAQEIDADWQQFEDPYQWQIRPAR	SAOUHSC_00410	Uncharacterized protein	no		no	-0.293104		-0.0467184		-0.746221				-0.319892	-0.266316	-0.159009	0.0655723	-0.818198	-0.674245
Q2FWC5_C373	Q2FWC5	FGUIWHGDSK	SAOUHSC_02373	Uncharacterized protein	no		no			-1.08746								-1.10243	-1.07248
Q2FX14_C53	Q2FX14	SSVETLELTHLIVEEAYHUGASDVR	SAOUHSC_02092	Aminopeptidase PepS, putative	no		no			-0.312083		-0.781639						-0.412635	-0.211531	-1.05676	-0.506517
Q2FXD1_C358	Q2FXD1	IPULTEQDK	SAOUHSC_01932	Type I restriction-modification enzyme, S subunit, EcoA family, putative	no		no	0.276399		-0.254012		-0.433301		-0.698279		0.773523	-0.220725	-0.21851	-0.289514	-0.431357	-0.435245	-0.56307	-0.833487
Q2FZW2_C30	Q2FZW2	DGGDUSLIDVEDGIVK	SAOUHSC_00873	Uncharacterized protein	no		no	0.960152		0.183518		-0.523908		-1.73101		1.07881	0.84149	0.184725	0.182311	-0.42777	-0.620046	-1.70266	-1.75936
Q2FW90_C2	Q2FW90	MUNDTLELLR	SAOUHSC_01993	Transposase, putative	no		no			0.469755		-0.330928		-1.25126				0.632082	0.307429	-0.405948	-0.255908	-1.43039	-1.07212
Q2G0Q7_C94	Q2G0Q7	SEVAEAULK	SAOUHSC_00489	Dihydropteroate synthase	yes		no	-1.1147								-0.98376	-1.24564
P0A086_C12	P0A086	TKEYATLAGGUFWCMVKPFTSYPGIK	msrA2	Peptide methionine sulfoxide reductase MsrA 2	no	Functional site	no	-1.11845								-1.09028	-1.14663
Q2FXI9_C1215	Q2FXI9	TQTQSQDELFDDVUAFMVNEGHISTSLIQR	SAOUHSC_01857	Uncharacterized protein	no		no							-1.14503								-1.0546	-1.23545
Q2FXE1_C105	Q2FXE1	ENLVYUDLIEHLILHAIITK	SAOUHSC_01922	Uncharacterized protein	no		no					-1.15126								-0.980312	-1.32222
Q2FYZ9_C21	Q2FYZ9	IKSEYQDULLFFR	mutS	DNA mismatch repair protein MutS	no		no							-1.15263								-1.26764	-1.03762
Q2FYU4_C195	Q2FYU4	TGFGTGGWQLAALNIUSK	guaC	GMP reductase	no		no			-0.438484				-0.718371				-0.797338	-0.0796305			-0.64336	-0.793382
Q2FXD1_C350	Q2FXD1	LTHANLUNINLK	SAOUHSC_01932	Type I restriction-modification enzyme, S subunit, EcoA family, putative	no		no	-0.130365		0.365345		-0.556486		-0.839303		-0.0861091	-0.174621	0.284751	0.445939	-0.690335	-0.422636	-0.674591	-1.00402
Q2FYN4_C199	Q2FYN4	GVHUHIGSQIEGTEAFIETAK	lysA	Diaminopimelate decarboxylase	no		no	-1.16151								-0.695839	-1.62718
Q2G0M5_C153	Q2G0M5	VAGELLUQYYFK	SAOUHSC_00535	Uncharacterized epimerase/dehydratase SAOUHSC_00535	no		no	0.528131		0.158564		-0.699124		-1.14927		0.629492	0.426771	0.0777107	0.239417	-0.699248	-0.699	-1.14741	-1.15112
Q2G1J4_C149	Q2G1J4	TMDDFVKPVIENLGFTIGEDIYLVHUPER	SAOUHSC_00128	Cap5O protein/UDP-N-acetyl-D-mannosaminuronic acid dehydrogenase	no		no	0.179694						-1.34691		0.313246	0.0461418					-1.89727	-0.796536
Q2G1L5_C64	Q2G1L5	IDNGDFLQGSPFUNYLIAHSGSSQPLVDFYNR	SAOUHSC_00107	Uncharacterized protein	no		no	-1.17212								-1.04252	-1.30173
Q2FUV5_C49	Q2FUV5	SSKLDGPYDGYAEUVK	SAOUHSC_02996	Peptide methionine sulfoxide reductase, putative	no		no	-1.17716								-1.11117	-1.24315
Q2G1B1_C199	Q2G1B1	IGFSDIFFNVDQLTSSEASLLQLSTGEPULR	SAOUHSC_00234	Uncharacterized protein	no		no	0.117043		-0.0142593		-0.596444		-0.68441		0.205518	0.0285692	-0.168512	0.139993	-0.623665	-0.569222	-0.738963	-0.629858
Q2FVX8_C34	Q2FVX8	DFDTDKGGQUVR	SAOUHSC_02544	Molybdenum cofactor biosynthesis protein B	no		no	0.0127394		-0.687553		-0.151703		-0.361056		0.192795	-0.167316	-0.787386	-0.58772	-0.107213	-0.196194	-0.173905	-0.548206
Q2G0K5_C20	Q2G0K5	KUGEVATQSAFK	SAOUHSC_00555	Hydrolase, haloacid dehalogenase-like	no		no	1.63606		-0.0753704		-1.02654		-1.73426		1.93693	1.3352	-0.130839	-0.0199016	-0.975765	-1.07731	-1.78578	-1.68274
Q2G078_C719	Q2G078	LLSVEECTSUSI	SAOUHSC_00742	Ribonucleoside-diphosphate reductase	yes		no							-1.20133								-1.13103	-1.27164
Q2FYN4_C66	Q2FYN4	AFTUIQMVK	lysA	Diaminopimelate decarboxylase	no		no	-0.36046		-0.84703						-0.228233	-0.492687	-0.97245	-0.721611
Q2G0I5_C36	Q2G0I5	LDPDAEIVIGUQSYCGPGR	SAOUHSC_00580	UPF0741 protein SAOUHSC_00580	no		no					-1.23356								-1.40687	-1.06025
Q2FZG6_C111	Q2FZG6	IVSHSVQEAYLPTGEGULSVDDNVAGLVHR	def	Peptide deformylase	yes	Functional site	no	-0.354881		-0.591653		0.053948		-0.344717		-0.0799049	-0.629858	-0.746132	-0.437174	0.333309	-0.225413	-0.432786	-0.256649
Q2FYG5_C16	Q2FYG5	ALDVUCGTGDWTIALSK	SAOUHSC_01487	Menaquinone biosynthesis methyltransferase, putative	no		no					-1.23969								-1.52895	-0.950425
Q2FXN3_C230	Q2FXN3	GLIPNVDFYSASVYHUMEIPHDLFTPIFAVSR	SAOUHSC_01802	Uncharacterized protein	no		no	0.571085		-0.305542		-1.51048				0.682843	0.459327	-0.290057	-0.321027	-1.396	-1.62496
Q2G0C7_C170	Q2G0C7	IMYUFNK	SAOUHSC_00678	Uncharacterized protein	no		no	-1.25331								-1.15373	-1.3529
Q2FZF5_C79	Q2FZF5	VHQFSGLLVDYUEQVGAK	coaD	Phosphopantetheine adenylyltransferase	yes	Functional site	no	-1.25395								-0.928457	-1.57945
Q2FYU4_C24	Q2FYU4	SEUDTTIQFGPK	guaC	GMP reductase	no		no	0.0961584		-0.0834239		-0.414903		-0.854094		0.154583	0.0377336	-0.0122135	-0.154634	-0.468631	-0.361175	-0.794482	-0.913705
Q2G1B8_C59	Q2G1B8	IDGNQFVUR	tarL	Teichoic acid ribitol-phosphate polymerase TarL	yes		no			-0.0493718		-0.429702		-0.783269				-0.17749	0.0787464	-0.450163	-0.40924	-0.880365	-0.686174
Q2FY74_C56	Q2FY74	QLIQEULGHLIDQGQSAK	xerD	Tyrosine recombinase XerD	no		no	-0.109757		-0.215227		-0.938149				0.0519985	-0.271513	-0.156675	-0.273779	-0.789362	-1.08694
Q2FWE5_C64	Q2FWE5	YYGGUEFVDVTESIAIDR	glyA	Serine hydroxymethyltransferase	no	Functional site	no	-0.180674		-0.148457		-0.256166		-0.679797		-0.00754958	-0.353797	-0.221906	-0.0750076	-0.272025	-0.240308	-0.60824	-0.751354
Q2FXU4_C194	Q2FXU4	HFEPVIHEFCSDUQSR	hisS	Histidine--tRNA ligase	yes		no	0.0926228		-0.12593		-1.23417				0.235972	-0.0507265	-0.195533	-0.0563262	-1.26795	-1.20038
Q2FX98_C58	Q2FX98	VLPNWTTCISIUALFR	SAOUHSC_01979	Uncharacterized protein	yes		no			-0.0112117		-0.722112		-0.5394				-0.175061	0.152638	-0.750276	-0.693948	-0.367713	-0.711086
Q2FWX5_C231	Q2FWX5	YDNIUTNHFEILTHENR	SAOUHSC_02146	Uncharacterized protein	no		no	0.279163		-0.12868		-0.504198		-0.91906		0.534858	0.0234683	-0.245728	-0.0116316	-0.471349	-0.537047	-0.87242	-0.9657
Q2G059_C54	Q2G059	DATHNUSAYTIGPEMNIQK	SAOUHSC_00763	Uncharacterized protein	no		no	-1.27459								-1.04354	-1.50565
Q2FZV8_C101	Q2FZV8	QSLMGGGFQIDNPNAIASUGCGSSFR	SAOUHSC_00877	Uncharacterized protein	no		no					-0.214696		-1.06313						0.117296	-0.546688	-0.830383	-1.29587
Q2G204_C79	Q2G204	MMUQFVEDIDVVVNILR	SAOUHSC_00942	GTP pyrophosphokinase, putative	no		no	-1.28424								-1.13318	-1.4353
Q2FZL5_C175	Q2FZL5	EIWYLUR	menB	1,4-dihydroxy-2-naphthoyl-CoA synthase	no		no	0.394961		0.533324		-0.524245		-1.69371		0.513037	0.276884	0.379086	0.687563	-0.445902	-0.602588	-1.66052	-1.7269
Q2FWE3_C12	Q2FWE3	ILFVCTGNTUR	ptpB	Low molecular weight protein-tyrosine-phosphatase PtpB	no	Functional site	no			0.654025		-0.808534		-1.13953				0.459012	0.849038	-0.87345	-0.743617	-1.25205	-1.027
Q2G1J3_C358	Q2G1J3	IUEAIEYYFGLR	SAOUHSC_00129	UDP-N-acetylglucosamine 2-epimerase	no		no	-0.947078				-0.348853				-0.710413	-1.18374			-0.485539	-0.212166
Q2FXY0_C277	Q2FXY0	RPLVUFFSNDLNIHR	SAOUHSC_01700	Uncharacterized protein	yes		no	0.161		-0.305494		-0.405261		-0.749742		0.267564	0.0544354	-0.404592	-0.206395	-0.38116	-0.429362	-0.654922	-0.844562
Q2G2P8_C50	Q2G2P8	AUVFSGSGLITVATHPTNHSALHSR	nnrD	ADP-dependent (S)-NAD(P)H-hydrate dehydratase	no		no	-1.30175								-1.63209	-0.971403
Q2G097_C201	Q2G097	EVADVHLUL	SAOUHSC_00724	Chorismate binding enzyme, putative	no		no					-0.388481		-0.931046						-0.267184	-0.509779	-0.786572	-1.07552
Q2FWG3_C65	Q2FWG3	ELQHLUHQYDVPFIVNDDVSLAK	thiE	Thiamine-phosphate synthase	no		no	0.330318						-1.65146		-0.0264255	0.687061					-1.6034	-1.69951
Q2FVE5_C79	Q2FVE5	SLQYITAQUVK	SAOUHSC_02769	Uncharacterized protein	no		no	-0.408336		-0.260907		-0.666376				-0.455238	-0.361435	-0.416558	-0.105256	-0.635159	-0.697593
Q2G2T8_C177	Q2G2T8	LMAQSSIKPMVNQIEVHPYFNQQELQEFUDR	SAOUHSC_00712	Uncharacterized protein	no		no	-1.33695								-1.1613	-1.5126
Q2G042_C58	Q2G042	VLELSPDDLEIQIDYAQULVQLGIAK	SAOUHSC_00784	Uncharacterized protein	no		no					-1.34737								-1.54011	-1.15463
Q2G2X2_C106	Q2G2X2	DKUEVIYLK	tarD	Glycerol-3-phosphate cytidylyltransferase	yes		no	1.1148				-0.977223		-1.48849		1.22441	1.00518			-0.892392	-1.06205	-1.36294	-1.61405
O07325_C175	O07325	CVEAUGVDVLDVYSDAYNYGSILTATEK	ftsA	Cell division protein FtsA	yes		no					-0.320131		-1.03554						-0.132309	-0.507952	-1.23368	-0.837403
Q2FXT6_C259	Q2FXT6	YLMGVGSPDALIEUSIR	tgt	Queuine tRNA-ribosyltransferase	no		no	0.0106356		-0.393768		-0.17593		-0.803458		0.00891709	0.0123541	-0.513111	-0.274425	-0.179923	-0.171937	-0.536859	-1.07006
Q2FX98_C73	Q2FX98	DSEVLNSTFGUDPLEIVQTISR	SAOUHSC_01979	Uncharacterized protein	yes		no	1.11981				-2.49136				1.2526	0.98703			-2.51854	-2.46419
Q2FUW0_C122	Q2FUW0	EKUIEAPGYR	SAOUHSC_02991	Uncharacterized protein	no		no	0.557626		0.232434		-0.939311		-1.22651		0.716245	0.399007	0.145482	0.319387	-0.860766	-1.01786	-1.0743	-1.37872
Q2FZ20_C448	Q2FZ20	IVSEVLESNGSSSQASIUGSTLALMDAGVPIK	pnp	Polyribonucleotide nucleotidyltransferase	no		no	-1.38508								-1.48124	-1.28891
Q2G1E6_C263	Q2G1E6	NGATIILESAWAINSLEVDEAKUSLSGTK	SAOUHSC_00179	Uncharacterized protein	no		no	0.107914		-0.630667		-0.448197		-0.415514		0.243547	-0.0277191	-0.798441	-0.462893	-0.554528	-0.341866	-0.271618	-0.559409
Q2G1C1_C372	Q2G1C1	FUSLEDGQASQR	tarF	Teichoic acid glycerol-phosphate transferase	yes		no	-0.214568						-1.17895		-0.194212	-0.234924					-1.1677	-1.19021
Q2FXL1_C344	Q2FXL1	EIGTFETSIQPFEDUCTIFTPK	thiI	Probable tRNA sulfurtransferase	no		no			0.00381562		-0.677965		-0.719685				-0.231278	0.238909	-0.472029	-0.883901	-0.464285	-0.975085
Q2FZM1_C148	Q2FZM1	WSLNUDINNEAALK	SAOUHSC_00979	Uncharacterized protein	no		no	0.198928				-0.918337		-0.674866		0.307545	0.0903115			-0.955592	-0.881082	-0.857391	-0.492342
Q2G0Q1_C128	Q2G0Q1	DQFTVPFVUGCR	pdxS	Pyridoxal 5'-phosphate synthase subunit PdxS	no		no	0.823896		0.798868				-3.02025		1.03823	0.609566	0.811307	0.786429			-3.3459	-2.6946
Q2FYF5_C38	Q2FYF5	GQUVILDNEDVTDFLR	SAOUHSC_01496	Cytidylate kinase	yes		no	-0.280202		-0.593009		0.165309		-0.712264		-0.063406	-0.496997	-0.767609	-0.418408	0.124725	0.205893	-0.683229	-0.7413
Q2G1C8_C317	Q2G1C8	LAMMQGNLAQAMATUAQLANMQAHGEYDEVATSTAK	SAOUHSC_00197	Uncharacterized protein	no		no	-0.531364		-0.409214		-0.487418				-0.440773	-0.621955	-0.543846	-0.274582	-0.810081	-0.164755
Q2FWD1_C439	Q2FWD1	LGLYSUSIK	pyrG	CTP synthase	yes		no	0.148995		0.256776		-1.00125		-0.837766		0.308232	-0.0102416	0.211514	0.302038	-1.04679	-0.955706	-0.800797	-0.874736
Q2G0K5_C32	Q2G0K5	AUGLTEPSSK	SAOUHSC_00555	Hydrolase, haloacid dehalogenase-like	no		no	1.31135		-0.149101		-0.975753		-1.63072		1.43007	1.19264	-0.14315	-0.155052	-0.962772	-0.988733	-1.5855	-1.67595
Q2G282_C102	Q2G282	FDFNTHNHYHIIUEQCGK	perR	Peroxide-responsive repressor PerR	no	Functional site	no					-0.195389		-1.25148						-0.360453	-0.0303245	-1.17547	-1.32749
Q2FZH7_C172	Q2FZH7	DHIQKUENVIK	SAOUHSC_01027	Uncharacterized protein	no		no	0.470159		-0.430757		-0.538573		-0.949862		0.553188	0.38713	-0.498001	-0.363514	-0.495385	-0.581762	-1.03889	-0.860838
Q2FXU1_C278	Q2FXU1	VIVNSINDUYAILGLVHTLWK	SAOUHSC_01742	GTP pyrophosphokinase	yes		no	-0.602247		-0.282852		-0.0678307		-0.502837		-0.919811	-0.284683	-0.986645	0.42094	0.126444	-0.262106	-0.499259	-0.506414
Q2FZJ4_C71	Q2FZJ4	ALNQLGQKUDVITYEFENISAQQLK	purK	N5-carboxyaminoimidazole ribonucleotide synthase	no		no	-0.0139661		-1.29866		-0.145837				0.103665	-0.131598	-1.33756	-1.25977	-0.35089	0.0592168
Q2FYM2_C303	Q2FYM2	DUDKKNFAEIEAEIANLAVK	odhB	Dihydrolipoyllysine-residue succinyltransferase component of 2-oxoglutarate dehydrogenase complex	no		no	-0.195076		-0.0428588		-0.274585		-0.947346		0.0515809	-0.441732	-0.145487	0.0597698	-0.278334	-0.270836	-0.883715	-1.01098
Q2G112_C51	Q2G112	EADFINUVVFR	SAOUHSC_00349	Single-stranded DNA-binding protein	yes		no	-0.0830809		-0.151324		-0.148217		-1.11654		0.134855	-0.301017	-0.34333	0.0406821	-0.182164	-0.114269	-1.11347	-1.1196
Q2FY54_C35	Q2FY54	LGESVHEGTIEQWLVSVGDHIDEYEPLUEVITDK	SAOUHSC_01611	Dihydrolipoamide acetyltransferase component of pyruvate dehydrogenase complex	no		no							-1.50142								-1.38278	-1.62007
Q2G1U3_C425	Q2G1U3	FQPSNSSDYTIFVAEVASTUNEALLSDYMDK	SAOUHSC_00937	Oligoendopeptidase F	no		no	-1.50232								-1.54069	-1.46395
Q2FWG2_C16	Q2FWG2	IENPLTIUYTNDVVK	thiM	Hydroxyethylthiazole kinase	no		no	0.39713		-0.144792		-0.829109		-0.925912		0.483571	0.310689	-0.24501	-0.0445735	-0.846796	-0.811422	-0.95061	-0.901215
Q2FYH8_C199	Q2FYH8	CDIUPLLEDCR	nth	Endonuclease III	no	Functional site	no					-1.50783								-1.97092	-1.04475
Q2FZF5_C36	Q2FZF5	STDRFDEIHVUVLK	coaD	Phosphopantetheine adenylyltransferase	yes		no			-1.51478								-1.97415	-1.05541
Q2G0L3_C214	Q2G0L3	VILNEDQHQQFFDTEDELVQYFLHQLUK	SAOUHSC_00547	Uncharacterized protein	no		no			-1.28519				-0.25463				-1.70849	-0.861893			-0.629479	0.120219
Q2FZ65_C103	Q2FZ65	GMGTTUVCALVFEK	SAOUHSC_01186	Uncharacterized protein	no		no	-1.40207		-0.143802						-1.17267	-1.63147	-0.525413	0.237808
Q2FYS9_C509	Q2FYS9	DAGLQPYLDDLGFNLVGYGUTTCIGNSGPLLPEIEK	SAOUHSC_01347	Aconitate hydratase	no		no	0.782553		0.1413		-1.31048		-1.16186		0.935912	0.629193	0.155231	0.127369	-1.29509	-1.32586	-1.05664	-1.26708
Q2G0L9_C137	Q2G0L9	EAUSTLLTTFFK	tadA	tRNA-specific adenosine deaminase	no		no	0.456274		0.26802		-0.465764		-1.80798		0.591775	0.320773	0.145482	0.390558	-0.354557	-0.576971	-1.80687	-1.80909
Q2FZZ6_C35	Q2FZZ6	FVESVENGNLPVLPUIEMDLK	SAOUHSC_00838	Uncharacterized protein	no		no	-0.27235		-0.352658		-0.927043				-0.0897586	-0.454941	-0.441791	-0.263525	-0.805585	-1.0485
Q2G090_C233	Q2G090	THDEDAGIIYUSTR	SAOUHSC_00730	ATP-dependent DNA helicase RecQ	no		no	0.32539				-0.634672		-1.24746		0.660929	-0.0101489			-0.410332	-0.859012	-1.05637	-1.43854
Q2FUQ2_C88	Q2FUQ2	TFTREDIIEINUHGGILTINR	mnmE	tRNA modification GTPase MnmE	yes	Functional site	no	-0.0447664		0.131576		-0.5463		-1.09802		0.514198	-0.603731	0.252658	0.0104934	-0.419391	-0.67321	-1.27498	-0.921062
Q2FY37_C149	Q2FY37	SSVUFDAPSWYELVVEGR	lipM	Octanoyltransferase LipM	no	Functional site	no	2.73022		-0.856892		-1.6991		-1.73913		2.94604	2.5144	-1.02515	-0.688636	-1.64611	-1.7521	-1.92665	-1.55161
Q2FV86_C161	Q2FV86	GVAVVIUPNDLLTEK	SAOUHSC_02849	Pyruvate oxidase, putative	no		no	0.000759358				-0.611741		-0.956852		0.113167	-0.111648			-0.631064	-0.592419	-0.95744	-0.956264
Q2FWM4_C198	Q2FWM4	EHUYASVR	SAOUHSC_02265	Accessory gene regulator protein A	no		no	1.22968		0.305896		-1.31711		-1.78736		1.32343	1.13593	0.161307	0.450485	-1.22179	-1.41242	-1.73015	-1.84456
Q2FWB7_C76	Q2FWB7	ILAVGGNPVGTLTEULEQSIVK	SAOUHSC_02381	Uncharacterized protein	no		no	-0.226444		0.0729577		-0.629478		-0.794294		-0.0451039	-0.407785	-0.0552165	0.201132	-0.639198	-0.619758	-0.754456	-0.834133
Q2G1L5_C345	Q2G1L5	SDADVAUTALFDSASGFK	SAOUHSC_00107	Uncharacterized protein	no		no	-1.57993								-1.50177	-1.65808
Q2G0T5_C475	Q2G0T5	FEEEIHUEIVNKDDEKR	dnaX	DNA polymerase III subunit gamma/tau	yes		no							-1.58014								-1.49517	-1.66511
Q2G1N2_C147	Q2G1N2	DLTIIGUGLIGDK	SAOUHSC_00076	Ornithine cyclodeaminase, putative	no		no	0.39632				-0.316602		-1.66325		0.720191	0.0724489			-0.194212	-0.438992	-1.6129	-1.71359
Q2FYG9_C148	Q2FYG9	VAVGALUK	aroC	Chorismate synthase	no		no	-0.881951		0.240651		-0.0632134		-0.879029		-0.784955	-0.978947	0.0908534	0.390448	-0.000649359	-0.125777	-0.861133	-0.896925
Q2FZ07_C53	Q2FZ07	YSTIATNUYDTAEVIK	SAOUHSC_01264	Uncharacterized protein	no		no	0.963419		-0.700481		-0.688293		-1.16529		1.13969	0.787146	-0.735006	-0.665956	-0.671932	-0.704655	-1.01948	-1.31109
Q2G2T1_C270	Q2G2T1	EAEILUYIDNIDAR	SAOUHSC_01973	Uncharacterized protein	no		no	-0.626227		-0.0687834		-0.298519		-0.607137		-0.413788	-0.838667	-0.157625	0.0200577	-0.0564912	-0.540547	-0.676641	-0.537634
Q2G223_C34	Q2G223	AFNYDIPNETTGEUWAISAHPNGPNTIINGPYK	SAOUHSC_02976	Mannose-6-phosphate isomerase, class I	no		no					-0.813226		-0.788263						-0.915201	-0.711252	-0.672681	-0.903846
Q2FZH5_C504	Q2FZH5	WTGMUGEMAGDETAIPLLLGLGLDEFSMSATSILK	SAOUHSC_01029	Phosphoenolpyruvate-protein phosphotransferase	no	Functional site	no	-0.808979		-0.793473						-0.560779	-1.05718	-0.981394	-0.605552
Q2G039_C262	Q2G039	SQLVIAIGUTGGQHR	SAOUHSC_00787	Nucleotide-binding protein SAOUHSC_00787	no		no	-0.127972		-0.18292		-0.659713		-0.63971		-0.014485	-0.241458	-0.390869	0.0250288	-0.793057	-0.526369	-0.569822	-0.709599
Q2FZ32_C678	Q2FZ32	TTQVIUSNCDYK	topA	DNA topoisomerase 1	yes		no							-1.62221								-1.68348	-1.56094
Q2FWM2_C38	Q2FWM2	QIGGAPUNVACTVQK	SAOUHSC_02267	Fructokinase, putative	no		no			1.06219		-1.06102		-1.63297				0.957989	1.16639	-0.939787	-1.18226	-1.46049	-1.80546
Q2FVV6_C107	Q2FVV6	QULSLPQTR	SAOUHSC_02585	Uncharacterized protein	no		no	0.313959		0.0602808		-1.00835		-0.999187		0.45607	0.171847	-0.0190388	0.1396	-1.07443	-0.942279	-0.961227	-1.03715
Q2FVY0_C326	Q2FVY0	HMUGALEVFPQIIK	SAOUHSC_02542	Molybdopterin biosynthesis protein moeA, putative	no		no	-1.15833		-0.480124						-1.14883	-1.16783	-0.923797	-0.0364519
Q2G1Y6_C400	Q2G1Y6	EIDGVMUEPFER	SAOUHSC_01058	GTP-binding protein TypA, putative	no		no	-0.43223		-0.271092		-0.937166				-0.265414	-0.599047	-0.533096	-0.00908869	-0.992001	-0.882332
Q2G2E9_C191	Q2G2E9	TMTUGTSISLR	SAOUHSC_00030	Uncharacterized protein	no		no	-0.00314409		-0.836645		-0.804896				0.153027	-0.159315	-0.956571	-0.716718	-1.07245	-0.53734
Q2FZ53_C118	Q2FZ53	GVFNUIQK	SAOUHSC_01199	3-oxoacyl-(Acyl-carrier-protein) reductase, putative	yes		no	0.268193		0.0827456		-0.872553		-1.12328		0.422681	0.113704	-0.0326936	0.198185	-0.820814	-0.924293	-1.12335	-1.12322
Q2FWB5_C12	Q2FWB5	TAETNYFWLNUGYNR	SAOUHSC_02383	Uncharacterized protein	no		no	0.475226		-0.744806		-0.710573		-0.665801		0.677711	0.27274	-0.674591	-0.815022	-0.762608	-0.658538	-0.681284	-0.650318
Q2FUQ4_C74	Q2FUQ4	HFYDSIAPSFYFDFNQPISIUDVGAGAGFPSIPLK	rsmG	Ribosomal RNA small subunit methyltransferase G	no	Functional site	no	-0.640944		-0.724662		-0.294868				-0.576411	-0.705476	-0.621222	-0.828101	-0.335499	-0.254238
P47768_C926	P47768	IHVGDKMUGR	rpoB	DNA-directed RNA polymerase subunit beta	yes		no	-1.66208								-1.57093	-1.75323
Q2FZV7_C185	Q2FZV7	IPELUSK	SAOUHSC_00878	NADH dehydrogenase-like protein SAOUHSC_00878	no		no	0.281652		-0.104515		-0.366722		-1.47314		0.443462	0.119841	-0.285066	0.0760369	-0.357198	-0.376246	-1.50268	-1.44361
Q2FZ87_C189	Q2FZ87	LNLEYAPUDELSMGMSNDYLIAVEEGATFVR	SAOUHSC_01153	Pyridoxal phosphate homeostasis protein	no		no	-1.66577								-1.5233	-1.80824
Q2G0G2_C106	Q2G0G2	NEQGPYYAGLTAUYLLVNK	SAOUHSC_00607	Uncharacterized protein	no		no	0.532498				-0.961045		-1.23751		0.525267	0.53973			-0.851912	-1.07018	-1.17069	-1.30433
Q2FWE4_C124	Q2FWE4	DPIVVEHITVPUGIDIGQTLIGMHIK	SAOUHSC_02355	UPF0340 protein SAOUHSC_02355	no		no	-0.772937						-0.898547		-0.588857	-0.957017					-0.767094	-1.03
Q2FZA2_C201	Q2FZA2	QHSIIVGDSLTSDILGGINAGIATUWFNFR	SAOUHSC_01137	Uncharacterized protein	no		no					-0.721036		-0.952534						-0.898942	-0.543131	-0.903711	-1.00136
Q2G0F3_C91	Q2G0F3	YLYIEEVAFVUHEMGGIIGADISVR	SAOUHSC_00616	Uncharacterized protein	no		no	-0.174105		-0.783281		-0.716643				0.121679	-0.469889	-0.913026	-0.653537	-0.634643	-0.798642
Q2FZ97_C39	Q2FZ97	GLDKULFGYTLDEWQQIEEK	mraZ	Transcriptional regulator MraZ	no		no	-1.67428								-1.53755	-1.81102
Q2FYP0_C302	Q2FYP0	DDSLENTFHVWUTSDNLLK	asd	Aspartate-semialdehyde dehydrogenase	no	Functional site	no	0.802947		0.0537028		-0.816305		-1.71642		1.00734	0.598556	-0.0632886	0.170694	-0.757925	-0.874685	-1.63518	-1.79766
Q2G0Q2_C406	Q2G0Q2	NGLTLQEULDR	SAOUHSC_00497	Uncharacterized protein	no		no	-1.15439		-0.223085		-0.314516				-0.693178	-1.6156	-0.131455	-0.314715	-0.366373	-0.262659
Q2FZM1_C45	Q2FZM1	SUVDATYR	SAOUHSC_00979	Uncharacterized protein	no		no	0.322581		0.0741656		-1.15505		-0.937795		0.474981	0.170181	0.0398403	0.108491	-1.1729	-1.1372	-0.907522	-0.968068
Q2FXT6_C281	Q2FXT6	NGTUMTSQGR	tgt	Queuine tRNA-ribosyltransferase	no		no	-0.884114		-0.813008						-0.814286	-0.953942	-1.03392	-0.592093
Q2G0U9_C235	Q2G0U9	GYNTPVFSHQNLYTWGQUTYHVFNR	sle1	N-acetylmuramoyl-L-alanine amidase sle1	no		no	0.115285		-0.67122		-0.645836		-0.508604		0.134561	0.0960088	-0.592841	-0.7496	-0.675005	-0.616668	-0.368633	-0.648575
Q2G0I5_C11	Q2G0I5	NTFLICDEUQAVNIR	SAOUHSC_00580	UPF0741 protein SAOUHSC_00580	no		no							-1.73484								-1.68594	-1.78374
Q2G069_C126	Q2G069	DYALTGLEFAUGIPGSIGGAVYMNAGAYGGEVK	murB	UDP-N-acetylenolpyruvoylglucosamine reductase	yes		no			0.310765		-0.752911		-1.29617				0.117163	0.504366	-0.685129	-0.820693	-1.28673	-1.30561
Q2FXE2_C28	Q2FXE2	VENDENUMESVK	SAOUHSC_01907	Uncharacterized protein	no		no	-0.572389		-0.528906		-0.637125				-0.475013	-0.669765	-0.735884	-0.321928	-0.723849	-0.550402
Q2FVT5_C347	Q2FVT5	PLFUEGKGPFR	hutU	Urocanate hydratase	no		no	-0.241423		-0.326425		-0.602658		-0.579537		-0.138839	-0.344007	-0.465854	-0.186997	-0.658877	-0.546439	-0.502403	-0.656672
Q2FY15_C250	Q2FY15	TLNLIDILNPYLCIIFUNSR	cshB	DEAD-box ATP-dependent RNA helicase CshB	no		no			-0.722488		-0.497311		-0.530269				-0.817282	-0.627694	-0.539226	-0.455396	-0.504653	-0.555884
P95689_C260	P95689	FTGQSAUFR	serS	Serine--tRNA ligase	yes	Functional site	no	-0.213501		-0.682594		-0.411331		-0.445689		-0.0678643	-0.359139	-0.892219	-0.472969	-0.466315	-0.356346	-0.386647	-0.504731
Q2FXZ8_C191	Q2FXZ8	TAQTVTDLRPAGIIFUENER	SAOUHSC_01677	Uncharacterized protein	no		no	-0.151384		-0.468073				-1.13389		0.263096	-0.565863	-0.609993	-0.326154			-0.950787	-1.317
Q2G0E2_C113	Q2G0E2	GIGQALLDAIMAWULNNQIHR	SAOUHSC_00663	Uncharacterized protein	no		no	-1.75482								-1.67941	-1.83023
Q2G0U6_C60	Q2G0U6	QUVAFFTLHR	SAOUHSC_00430	Uncharacterized protein	no		no	-0.57073				-0.563258		-0.62486		-0.536984	-0.604476			-0.339272	-0.787244	-0.907928	-0.341793
Q2FY33_C223	Q2FY33	IWDGLLEYNVMPUGLGAR	gcvT	Aminomethyltransferase	no		no	-0.14232		0.125237		-0.8592		-0.886515		-0.00878384	-0.275856	0.0455828	0.204892	-0.825338	-0.893062	-0.848687	-0.924344
Q2FZZ3_C28	Q2FZZ3	DVTTFYEEDKHLIFGYTPTUGTCK	SAOUHSC_00841	Uncharacterized protein	no		no							-1.76745								-2.28209	-1.25281
Q2FXG1_C57	Q2FXG1	GLIUAPVSK	ribBA	Riboflavin biosynthesis protein RibBA	no		no	-0.245512		-0.799068		0.193299		-0.927487		-0.117584	-0.373439	-0.811017	-0.787119	0.202762	0.183836	-0.822171	-1.0328
Q2FY27_C15	Q2FY27	IILAADVGGTTUK	SAOUHSC_01646	Glucokinase, putative	no		no	-0.331601		0.316824		-0.711256		-1.05489		-0.16813	-0.495072	0.225923	0.407725	-0.674184	-0.748329	-1.0347	-1.07508
Q2FZL8_C347	Q2FZL8	GLYGAPVGYIDIYDDUEFIVAIR	SAOUHSC_00982	Uncharacterized protein	no		no			0.365213		-1.15987		-0.989119				0.459956	0.270469	-1.0916	-1.22813	-1.0048	-0.973441
Q2FWM4_C25	Q2FWM4	NMNDIGUYFLDIQLSTDINGIK	SAOUHSC_02265	Accessory gene regulator protein A	no		no	0.924984		-2.70966						0.942308	0.90766	-2.63612	-2.78319
Q2FWC7_C48	Q2FWC7	LULTGGNAGVIAENINIPAQIFVEFDAASQGLGILLK	coaW	Type II pantothenate kinase	yes		no			-0.0974169		-0.931906		-0.758336				-0.115066	-0.0797677	-0.853997	-1.00981	-0.684132	-0.832539
Q2FXP5_C72	Q2FXP5	FADUPNFVK	SAOUHSC_01791	Uncharacterized protein	yes		no	-0.354658		0.196915		-0.836097		-0.799516		-0.21296	-0.496356	0.133564	0.260267	-0.763562	-0.908632	-0.720683	-0.878348
Q2FZZ6_C173	Q2FZZ6	QTITUTDYKYDEDVLALWNK	SAOUHSC_00838	Uncharacterized protein	no		no	-0.365275				-1.43072				-0.161863	-0.568687			-1.45553	-1.40591
Q2G0Q9_C271	Q2G0Q9	EDHGAEAVUHFCGNK	hslO	33 kDa chaperonin	no		no	-0.490251				-1.3139				-0.630238	-0.350265			-1.35096	-1.27683
Q2G1W2_C221	Q2G1W2	GIFSVMNYLLPMQDIMSMHUSANVGEK	pckA	Phosphoenolpyruvate carboxykinase (ATP)	no	Functional site	no	-1.80435								-1.7472	-1.8615
Q2FZQ7_C38	Q2FZQ7	QFVDVQNDYDCYFUIVDQHAITMPQDR	trpS	Tryptophan--tRNA ligase	yes		no			-1.02128		-0.789024						-0.941171	-1.10138	-0.874428	-0.703619
Q2FXM8_C175	Q2FXM8	DUGDLALWAGLSVGAETIVVPEVK	pfkA	ATP-dependent 6-phosphofructokinase	yes		no					-0.371539		-1.43893						-0.337321	-0.405757	-1.45557	-1.42229
Q2FZ58_C193	Q2FZ58	GLLUVYEGFLK	SAOUHSC_01193	Uncharacterized protein SAOUHSC_01193	no		no	0.142798		0.285494		-0.807616		-1.43613		0.295135	-0.00953883	0.192699	0.37829	-0.733219	-0.882012	-1.39074	-1.48153
Q2FUW0_C139	Q2FUW0	ESPVHFEUEYVQTIR	SAOUHSC_02991	Uncharacterized protein	no		no	0.525895		0.126666		-1.09721		-1.37994		0.720918	0.330872	-0.0242965	0.277628	-1.0429	-1.15152	-1.31491	-1.44497
Q2FZB0_C187	Q2FZB0	NNVANALMQGAAIMGMNFHLVUPK	argF	Ornithine carbamoyltransferase	no		no	-1.84747								-1.42349	-2.27146
Q2G116_C37	Q2G116	IKUENCQR	SAOUHSC_00345	Uncharacterized protein	yes		no	0.43405		-0.432545		-0.778974		-1.07736		0.41846	0.449641	-0.394221	-0.470869	-0.773664	-0.784284	-1.17651	-0.978208
Q2FZS8_C309	Q2FZS8	GELHUIGATTLNEYR	clpB	Chaperone protein ClpB	no		no	-0.463248		0.135775		-0.588779		-0.947338		-0.328526	-0.59797	0.202261	0.0692897	-0.607383	-0.570174	-0.916854	-0.977822
Q2FY50_C489	Q2FY50	DIAEYIQVIUISHLPQVASMSDHHLLISK	SAOUHSC_01615	DNA repair protein RecN	no		no	-0.933453		-0.932188						-0.811675	-1.05523	-1.1097	-0.754675
Q2G2Q9_C100	Q2G2Q9	ETFKEEGLEPWTSUEFDFTR	SAOUHSC_00274	Uncharacterized protein	no		no	-1.86749								-1.492	-2.24298
Q2FZD8_C120	Q2FZD8	SEGMIUSLQEIGISSNYIPK	pheT	Phenylalanine--tRNA ligase beta subunit	yes		no	-1.35947		-0.512306						-1.19548	-1.52346	-0.567554	-0.457059
Q2FYN0_C47	Q2FYN0	HYQQLINQUK	SAOUHSC_01405	Uncharacterized protein	no		no	-0.075586		0.405171		-0.921175		-1.29271		0.183963	-0.335135	0.356482	0.45386	-1.26899	-0.57336	-0.774454	-1.81097
Q2FVT6_C215	Q2FVT6	QYADFADIFUETGVFTIEQSQHYMQK	hutI	Imidazolonepropionase	no		no	-0.0157726		-0.610654		-0.63765		-0.626257		0.0792928	-0.110838	-0.716552	-0.504755	-0.673279	-0.602022	-0.683483	-0.56903
Q2FZ54_C161	Q2FZ54	IIEPANINUPGQIVVSGHK	SAOUHSC_01198	Malonyl CoA-acyl carrier protein transacylase	yes		no	-0.628696		0.203839		-0.669472		-0.842619		-0.505125	-0.752268	0.169775	0.237904	-0.599013	-0.73993	-0.726036	-0.959202
Q2G0N5_C60	Q2G0N5	IFGPTKDWEUSCGK	rpoC	DNA-directed RNA polymerase subunit beta'	yes		no			0.681879		-1.07315		-1.55551				0.66821	0.695548	-0.971742	-1.17456	-1.61821	-1.49281
Q2FWD1_C505	Q2FWD1	LVEMVEIPTNDFFIAUQFHPEFLSR	pyrG	CTP synthase	yes	Functional site	no	0.0484678		0.0702151		-1.09381		-0.974465		0.185359	-0.0884235	0.059909	0.0805212	-1.06205	-1.12557	-0.883076	-1.06585
Q2G0N5_C355	Q2G0N5	MYQUGLPK	rpoC	DNA-directed RNA polymerase subunit beta'	yes		no	-0.236511		-0.67813		-0.419032		-0.616079		-0.110698	-0.362325	-0.91678	-0.439481	-0.441889	-0.396175	-0.589789	-0.642369
Q2FZ58_C153	Q2FZ58	ANNTEDUIELMEYIIVK	SAOUHSC_01193	Uncharacterized protein SAOUHSC_01193	no		no	0.111392		0.277395		-0.90972		-1.43088		0.222063	0.000721167	0.198871	0.355918	-0.913461	-0.90598	-1.44124	-1.42051
Q2FVV6_C29	Q2FVV6	YUNVSKR	SAOUHSC_02585	Uncharacterized protein	no	Functional site	no	0.344778		-0.0711606		-1.13528		-1.09136		0.4246	0.264957	-0.0822398	-0.0600814	-1.09317	-1.17739	-0.925604	-1.25711
Q2G2C4_C196	Q2G2C4	EILSDAUK	tarI'	Ribitol-5-phosphate cytidylyltransferase 2	no		no	0.172049		-0.312773		-0.771355		-1.04287		0.259774	0.084323	-0.376522	-0.249024	-0.769377	-0.773334	-0.963115	-1.12262
Q2FVG3_C296	Q2FVG3	TDYIQNNYPTTKPIFAUYTKDEGDIYITSEQK	SAOUHSC_02751	Carboxylic ester hydrolase	no		no	-0.780742		-0.733255		-0.218219		-0.246627		-0.252518	-1.30897	-1.04264	-0.423875	-0.0634092	-0.373028	-0.0818275	-0.411426
Q2FYM1_C744	Q2FYM1	FLQLAAENNUTVVNLSSSSNYFHLLR	odhA	2-oxoglutarate dehydrogenase E1 component	no		no	-0.618998		-0.9297				-0.430553		-0.355239	-0.882757	-1.03091	-0.828486			-0.383623	-0.477482
Q2FWD1_C239	Q2FWD1	ESVIEUR	pyrG	CTP synthase	yes	Functional site	no	-0.0881556		-0.137339		-0.954862		-0.8026		0.0483731	-0.224684	-0.259668	-0.0150097	-0.903738	-1.00599	-0.748045	-0.857155
Q2G2P7_C85	Q2G2P7	SHAUGLGEPFSK	hutH	Histidine ammonia-lyase	no		no	-0.361335		-0.709702		-0.447796		-0.480386		-0.235858	-0.486812	-0.946055	-0.47335	-0.443634	-0.451958	-0.415538	-0.545235
Q2FYF3_C287	Q2FYF3	ETYETNIENUYIAGVIAAGNDANTIFIENGK	SAOUHSC_01499	Uncharacterized protein	no		no	-1.034		-0.982519						-0.899614	-1.16838	-1.01255	-0.95249
Q2FY64_C544	Q2FY64	QLRPYEAUVIELN	SAOUHSC_01601	Alpha-amylase	no		no			-2.01966								-2	-2.03931
Q2FZB0_C273	Q2FZB0	TGNPNVIFEHULPSFHNADTK	argF	Ornithine carbamoyltransferase	no		no	-2.02298								-1.64996	-2.396
Q2FZT0_C28	Q2FZT0	VNVDDEGVUTVDMTLTSMGCPMGPQIIDQVK	SAOUHSC_00910	Uncharacterized protein	no		no	-0.810244		-1.22776						-0.745212	-0.875275	-1.12784	-1.32767
Q2FW27_C130	Q2FW27	IUESCGTTYHLVFNPPKVEGICDIDGGK	adk	Adenylate kinase	yes	Functional site	no	0.607612		-1.20327		-0.765457		-0.67853		0.571579	0.643645	-1.2301	-1.17645	-0.776813	-0.754101	-0.324907	-1.03215
Q2FX05_C19	Q2FX05	EIGYIUAK	map	Methionine aminopeptidase	yes		no	0.514184		-1.19066		-0.400943		-0.964393		0.665029	0.363339	-1.3935	-0.987818	-0.397847	-0.404038	-1.0077	-0.92109
Q2FY52_C175	Q2FY52	LPFVUVIINNK	SAOUHSC_01613	2-oxoisovalerate dehydrogenase, E1 component, alpha subunit, putative	no		no	-0.900388		0.0709291		-0.29366		-0.942103		-0.834287	-0.966489	-0.130523	0.272382	-0.292246	-0.295075	-1.0209	-0.86331
Q2FVT0_C181	Q2FVT0	VNEDVAFITDNGNYILDUK	rpiA	Ribose-5-phosphate isomerase A	yes		no	-0.0632201		0.134406		-0.921646		-1.21957		0.0997417	-0.226182	0.049755	0.219058	-0.854101	-0.989192	-1.15428	-1.28486
Q2FXR4_C251	Q2FXR4	VGYHUAQGYFGVTPDLTCLGK	hemL1	Glutamate-1-semialdehyde 2,1-aminomutase 1	no		no			-1.0396		-1.03478						-1.07698	-1.00222	-1.12853	-0.941032
Q2FZ78_C227	Q2FZ78	DYTLVEUQLETGR	SAOUHSC_01163	Pseudouridine synthase	no		no	-0.695022				-0.649368		-0.743216		-0.755422	-0.634623			-0.670842	-0.627895	-0.563846	-0.922585
Q2G0P7_C105	Q2G0P7	FGUANCYATFKDDIIDIVR	mcsA	Protein-arginine kinase activator protein	no		no					-0.867774		-1.22046						-0.827538	-0.908009	-1.14982	-1.2911
Q2G2D0_C633	Q2G2D0	VGTIAGUYVTEGK	infB	Translation initiation factor IF-2	yes		no	0.459138		0.398149		-0.997064		-1.96265		0.605494	0.312781	0.315102	0.481196	-0.976418	-1.01771	-1.90877	-2.01654
Q2FWY3_C140	Q2FWY3	NVVSGHAIDAUGINGLYIK	SAOUHSC_02138	Uncharacterized protein	no		no					-0.68999		-1.43784						-0.579857	-0.800124	-1.30248	-1.57321
Q2G0K8_C30	Q2G0K8	EMAFNQHUK	nagB	Glucosamine-6-phosphate deaminase	no		no	-2.12815								-1.9402	-2.3161
Q2FYR9_C105	Q2FYR9	SLPFISGYVGTUSFDLVR	SAOUHSC_01366	Anthranilate synthase component I	no		no			-0.937926		-1.19069						-1.11989	-0.755965	-1.27463	-1.10675
Q2G2Q5_C100	Q2G2Q5	ETFKKEDLEPWTSUEFDFTR	SAOUHSC_00278	Uncharacterized protein	no		no	-2.13597								-1.67457	-2.59737
Q2G229_C46	Q2G229	AGNTTFLUGVNDDRVDEILSVINQTCGNR	SAOUHSC_00452	Uncharacterized protein	no		no	0.0978547		-0.471989		-0.879941		-0.889486		0.0103502	0.185359	-0.40173	-0.542248	-0.918142	-0.841741	-0.814032	-0.964939
Q2G236_C75	Q2G236	LVQMSVNELREEGIDUTFIAVK	nadE	NH(3)-dependent NAD(+) synthetase	yes		no	-2.14751								-1.85632	-2.4387
Q2FXQ8_C143	Q2FXQ8	HFDIPTLVIUTK	engB	Probable GTP-binding protein EngB	yes	Functional site	no	0.231199		-0.682788		-0.737249		-0.959499		0.559051	-0.0966532	-0.752391	-0.613186	-0.791815	-0.682682	-1.06802	-0.850975
Q2G031_C337	Q2G031	LFADELEGAHTVVWNGPMGVFEFSNFAQGTIGVUK	pgk	Phosphoglycerate kinase	yes		no	-0.253437		-0.269319		-0.78797		-0.851907		-0.0999892	-0.406885	-0.39407	-0.144568	-0.945165	-0.630774	-0.561111	-1.1427
Q2G037_C87	Q2G037	NNIYIUR	whiA	Putative sporulation transcription regulator WhiA	no		no	-0.660279		-0.762183		-0.274303		-0.487691		-0.694111	-0.626446	-0.643338	-0.881029	-0.273587	-0.275018	-0.355978	-0.619404
Q2FW96_C117	Q2FW96	TNHVNIVAUENAIMATDTLKK	mtlD	Mannitol-1-phosphate 5-dehydrogenase	no		no	-2.18978								-1.93198	-2.44757
Q2G0L0_C39	Q2G0L0	GIPVTYAULTLGQMGR	SAOUHSC_00550	Uncharacterized protein	no		no	-1.61151		-0.584299						-1.34681	-1.8762	0.052555	-1.22115
Q2FW37_C104	Q2FW37	YDUVGKR	truA	tRNA pseudouridine synthase A	no	Functional site	no					-2.19954								-2.34703	-2.05206
Q2FY08_C328	Q2FY08	YIPYUIEPSLGADR	glyQS	Glycine--tRNA ligase	yes		no	0.0138965		-0.310956		-1.09821		-0.808707		0.293606	-0.265813	-0.290286	-0.331627	-1.07112	-1.12529	-0.59518	-1.02223
Q2FVC2_C20	Q2FVC2	VINVVGAIIFSDNKILUAQR	SAOUHSC_02791	Pyrophosphohydrolase, putative	yes		no					-1.34804		-0.871547						-1.45644	-1.23963	-0.569287	-1.17381
Q2FW62_C189	Q2FW62	QETTEWUEK	SAOUHSC_02445	Zinc-type alcohol dehydrogenase-like protein	no		no	0.0800138		-0.667723		-0.883298		-0.752434		0.101919	0.0581086	-0.791433	-0.544014	-0.848972	-0.917624	-0.828204	-0.676665
Q2FZX3_C18	Q2FZX3	VDQHYFELIENYREUFNEEQFIAR	SAOUHSC_00862	Uncharacterized protein	no		no	0.00341866		-0.598693		-1.63224				0.342555	-0.335717	-0.562048	-0.635338	-1.44336	-1.82113
Q2FV34_C40	Q2FV34	YMFDYSAUK	SAOUHSC_02905	Uncharacterized protein	no		no	-2.23079								-2.04347	-2.41812
Q2FXZ5_C51	Q2FXZ5	IILTFNDQTVYLUEIADITSDKIEVDLK	SAOUHSC_01680	Ribosomal RNA small subunit methyltransferase E	no		no			-0.880966		-0.764449		-0.59137				-1.07203	-0.689905	-0.726886	-0.802013	-0.52493	-0.65781
Q2FZW9_C24	Q2FZW9	DADAUFITLSEQIDAEILAQSPNLK	SAOUHSC_00866	D-isomer specific 2-hydroxyacid dehydrogenase, NAD binding domain protein	no		no	-0.246977		-0.512542		-0.662511		-0.832299		-0.154116	-0.339838	-0.753413	-0.271671	-0.673924	-0.651098	-0.772029	-0.892568
P0A0M9_C14	P0A0M9	MLEDUFYIR	SAOUHSC_00995	Putative acetyltransferase SAOUHSC_00995	no		no	-0.325488		-0.871045		-0.169671		-0.899489		-0.0752312	-0.575744	-1.06619	-0.675904	-0.200996	-0.138346	-0.746083	-1.05289
Q2FUZ8_C579	Q2FUZ8	FNEWIEQGAAIYIUGDEK	SAOUHSC_02947	Sulfite reductase [NADPH] flavoprotein alpha-component	no		no	-1.51856				-0.754285				-1.05547	-1.98165			-0.725899	-0.78267
Q2FVV6_C175	Q2FVV6	AENVIFIGLLUK	SAOUHSC_02585	Uncharacterized protein	no		no	0.423828		-0.0825722		-1.47458		-1.13975		0.559479	0.288176	-0.262325	0.0971808	-1.49451	-1.45466	-1.03492	-1.24458
Q2FUQ3_C239	Q2FUQ3	AFSFETTEYILDQLPUWLTYTNAETHK	mnmG	tRNA uridine 5-carboxymethylaminomethyl modification enzyme MnmG	yes		no	-1.11386		0.137743		-0.376263		-0.924195		-0.988161	-1.23957	-0.138108	0.413594	-0.134651	-0.617875	-0.906278	-0.942113
Q2FZY4_C128	Q2FZY4	IKUATLAWK	SAOUHSC_00850	Uncharacterized protein	yes		no	0.844668		-0.616416		-1.07627		-1.4318		0.875072	0.814263	-0.70376	-0.529073	-1.21528	-0.93727	-1.42012	-1.44348
Q2FVN8_C697	Q2FVN8	YIUFKPS	SAOUHSC_02664	Transcriptional regulator, putative	no		no	-0.19603		-0.103953		-1.28132		-0.712991		-0.107321	-0.284739	0.00345832	-0.211364	-1.21432	-1.34831	-0.816825	-0.609156
Q2FZI5_C230	Q2FZI5	AFDHDEGPNTGGMGAYUPVPHISDDVLK	purD	Phosphoribosylamine--glycine ligase	no		no	-0.360672		-0.404282		-1.55252				-0.379808	-0.341537	-0.362455	-0.446109	-1.47389	-1.63115
Q2G2P7_C443	Q2G2P7	VLAIEUVIALQAAELK	hutH	Histidine ammonia-lyase	no		no	-1.35894				-0.960633				-1.57665	-1.14124			-1.05874	-0.862523
Q2FWE6_C159	Q2FWE6	FMULIAAPEGVEK	upp	Uracil phosphoribosyltransferase	no		no	-0.0941498		0.122212		-1.3054		-1.04969		0.0143553	-0.202655	0.0724489	0.171975	-1.29835	-1.31244	-1.02706	-1.07233
Q2FZT5_C112	Q2FZT5	IHQAQISTLHSFULK	addA	ATP-dependent helicase/nuclease subunit A	no		no	-2.35617								-1.78548	-2.92687
Q2G1D8_C383	Q2G1D8	LPDNFKTYUAK	pflB	Formate acetyltransferase	no		no	-0.605018		-0.940534				-0.827119		-0.482251	-0.727786	-1.14478	-0.736292			-0.741131	-0.913108
Q2FY35_C80	Q2FY35	NFGVDNGFYPLGSUTMK	gcvPB	Probable glycine dehydrogenase (decarboxylating) subunit 2	no		no	-0.692581		-1.00566		-0.681485				-0.531468	-0.853694	-1.10643	-0.904903	-0.651393	-0.711578
Q2FX00_C53	Q2FX00	VNVVEINETEGITFDEUDIFFIGGGSDREQALATK	SAOUHSC_02106	Uncharacterized protein	yes		no			-0.450626		-1.00548		-0.93864				-0.545403	-0.355848	-0.712008	-1.29896	-0.936469	-0.940811
Q2FVC3_C259	Q2FVC3	TILUALDVR	SAOUHSC_02790	Uncharacterized protein	no		no	-0.172574		-0.452875		-0.849888		-0.924039		-0.0257056	-0.319442	-0.247508	-0.658242	-0.838564	-0.861212	-0.80773	-1.04035
P0A011_C153	P0A011	IGSEUVAEDIPFFLEVLTYDDNIPDNGSVEFAK	lacD	Tagatose 1,6-diphosphate aldolase	no		no	0.421404		-0.633208		-1.29231		-0.900879		-0.180021	1.02283	-0.858018	-0.408397	-1.41162	-1.17299	-0.830101	-0.971657
Q2FUT4_C133	Q2FUT4	TNKUNQR	SAOUHSC_03017	Uncharacterized protein	no		no	-2.41405								-2.10197	-2.72614
Q2FV67_C473	Q2FV67	GUTSAVVGYHPFGGFK	rocA	1-pyrroline-5-carboxylate dehydrogenase	no		no			-0.737259		-1.01333		-0.668202				-0.790409	-0.684109	-1.04743	-0.979231	-0.610147	-0.726257
Q2FZ75_C53	Q2FZ75	TKUSFEMAELK	pyrB	Aspartate carbamoyltransferase	no		no	-0.8284		-0.922878		-0.686231				-0.657377	-0.999423	-1.03307	-0.812688	-0.731757	-0.640704
Q2FWJ9_C78	Q2FWJ9	GITUASAGNHAQGVAYTAK	ilvA	L-threonine dehydratase biosynthetic IlvA	no	Functional site	no	-0.336435		-0.131705		-1.12184		-0.849114		0.0662614	-0.739131	-0.211633	-0.0517765	-1.13625	-1.10743	-0.953156	-0.745073
Q2FXH2_C498	Q2FXH2	ETNTMPQWAGSUWYYLR	leuS	Leucine--tRNA ligase	yes		no	-0.976226		-0.581352		-0.484949		-0.416405		-0.872182	-1.08027	-0.693574	-0.46913	-0.495166	-0.474733	-0.461164	-0.371646
Q2FZ39_C277	Q2FZ39	IGNYUFDIFK	SAOUHSC_01214	Ribosome biogenesis GTPase A	yes		no	-0.127514		-0.974049		-0.694088		-0.692251		-0.0288644	-0.226163	-1.09631	-0.851786	-0.564906	-0.823269	-0.625344	-0.759158
Q2FYH6_C253	Q2FYH6	SVLENUK	asnS	Asparagine--tRNA ligase	no		no	-1.04029		0.37718		-0.894635		-0.937471		-0.755365	-1.32521	0.180011	0.574349	-0.931787	-0.857483	-0.919044	-0.955899
Q2G2D1_C11	Q2G2D1	KUILSNEMHPK	SAOUHSC_01244	Uncharacterized protein	yes		no	-1.75106				-0.754118				-1.51305	-1.98908			-0.457435	-1.0508
Q2G2M6_C28	Q2G2M6	MYVUGPTVYNYIHIGNAR	cysS	Cysteine--tRNA ligase	yes	Functional site	no	-0.747909				-0.937127		-0.820681		-0.717324	-0.778494			-1.10009	-0.774162	-0.753701	-0.88766
Q2FYH8_C166	Q2FYH8	LUSVIPR	nth	Endonuclease III	no		no	0.462685		-0.231895		-1.32511		-1.42143		0.563939	0.361432	-0.326317	-0.137473	-1.30066	-1.34957	-1.39487	-1.448
Q2FYH0_C346	Q2FYH0	QFGDIVVQHVDQLTLQHAUEQLK	aroB	3-dehydroquinate synthase	no		no					-1.17756		-1.3403						-1.12431	-1.2308	-1.06115	-1.61945
Q2G1E5_C181	Q2G1E5	ALQGGGSLIDYGUHLLDLSLWLLGK	SAOUHSC_00180	Uncharacterized protein	no		no	-1.24704				-0.608599		-0.680844		-1.03018	-1.46391			-0.745188	-0.472009	-0.902389	-0.459298
Q2G2C9_C56	Q2G2C9	LITDKUK	SAOUHSC_01245	Uncharacterized protein	yes		no	0.279232		-0.58413		-1.05816		-1.19408		0.357833	0.20063	-0.68615	-0.48211	-1.01707	-1.09925	-1.10983	-1.27834
Q2FVN7_C115	Q2FVN7	EDPELUVLR	SAOUHSC_02665	Uncharacterized protein	no		no	0.15148		-0.275988		-1.12786		-1.31942		0.285576	0.0173836	-0.456187	-0.0957895	-1.17835	-1.07737	-1.32565	-1.31318
Q2FYP2_C29	Q2FYP2	FTEGNUYGLIGANGAGK	SAOUHSC_01392	ABC transporter, ATP-binding protein, putative	no	Functional site	no					-1.68645		-0.885508						-1.40645	-1.96646	-0.765842	-1.00517
Q2FY15_C246	Q2FY15	TLNLIDILNPYLUIIFCNSR	cshB	DEAD-box ATP-dependent RNA helicase CshB	no		no			-0.853225		-0.944018		-0.787293				-0.971742	-0.734707	-1.04668	-0.841353	-0.821687	-0.752899
Q2FXZ5_C159	Q2FXZ5	LIUDTIDNYDYILIAYEEEAKDGELSNFK	SAOUHSC_01680	Ribosomal RNA small subunit methyltransferase E	no		no			-0.556627		-1.24469		-0.783668				-1.23148	0.118227	-1.33446	-1.15492	-1.14596	-0.42138
Q2FV14_C96	Q2FV14	LGVAIIPUSEMLR	SAOUHSC_02929	Acetyl-CoA synthetase, putative	no		no	-0.673805		-0.540331		-0.467982		-0.918156		-0.555079	-0.792532	-0.560473	-0.52019	-0.462734	-0.47323	-0.886806	-0.949505
Q2G0B1_C12	Q2G0B1	EQLUFSLYNAQR	mgrA	HTH-type transcriptional regulator MgrA	no		no	0.454003		-0.925745		-1.08851		-1.06045		0.603027	0.304978	-0.964151	-0.88734	-1.04934	-1.12768	-1.0373	-1.0836
Q2FZ38_C92	Q2FZ38	GPLAGPVVAUATILNSNHNYLGLDDSK	rnhB	Ribonuclease HII	no		no			-1.49739		-1.12502						-1.58888	-1.40591	-1.01999	-1.23006
Q2FZ02_C223	Q2FZ02	AWVNIMYGUDK	miaB	tRNA-2-methylthio-N(6)-dimethylallyladenosine synthase	no	Functional site	no	-2.63827								-2.57115	-2.70538
Q2G1E5_C72	Q2G1E5	LVDAVVIUTPNK	SAOUHSC_00180	Uncharacterized protein	no		no	-1.45476				-1.19613				-1.21207	-1.69745			-1.23817	-1.15409
Q2FYR2_C56	Q2FYR2	NNNNEVIAAULLTAVPVMK	femA	Aminoacyltransferase FemA	yes		no	-1.35977		-1.29252						-1.1223	-1.59723	-1.42558	-1.15946
Q2FYV1_C101	Q2FYV1	QDFDEIVDYUR	SAOUHSC_01323	Uncharacterized protein	no		no	-0.0814286		-0.256002		-1.30354		-1.04513		0.0870357	-0.249893	-0.449198	-0.0628063	-1.36814	-1.23895	-1.00162	-1.08865
Q2G0G2_C87	Q2G0G2	AAVEGDEAKEYWLUWVTTER	SAOUHSC_00607	Uncharacterized protein	no		no	-0.308671		-0.196706		-0.701389		-1.48402		-0.197583	-0.419758	-0.389092	-0.00432012	-1.15669	-0.246087	-1.91604	-1.052
Q2G1A9_C248	Q2G1A9	IGTMISHVPIYPYSUHPK	SAOUHSC_00236	6-phospho-beta-glucosidase, putative	no		no	-0.996786		-0.908049		-0.793174				-0.805963	-1.18761	-0.938652	-0.877447	-1.06982	-0.516532
P60393_C250	P60393	ISVITFHSLEDRLUK	rsmH	Ribosomal RNA small subunit methyltransferase H	no		no	-0.447091				-1.43903		-0.813282		-0.679088	-0.215094			-1.8604	-1.01765	-0.874904	-0.751659
Q2FZ74_C88	Q2FZ74	GGFTTVUPMPNTRPVPDSVEHFEALQK	pyrC	Dihydroorotase	no	Functional site	no	-1.63992		-0.38978		-0.670045				-1.39711	-1.88273	-0.696938	-0.0826217	-0.521867	-0.818223
Q2FYW6_C211	Q2FYW6	IGALUGEAIVFTK	SAOUHSC_01307	Uncharacterized protein	no		no	-2.70788								-2.46053	-2.95523
Q2FXG9_C181	Q2FXG9	NHAPFIUAIEK	SAOUHSC_01878	Uncharacterized protein	no		no	-0.472486		-0.448084		-0.811115		-0.984333		-0.36615	-0.578822	-0.390226	-0.505943	-0.825645	-0.796586	-0.921745	-1.04692
Q2FX98_C87	Q2FX98	NHUAYPNHAPTSDIYWNNIETR	SAOUHSC_01979	Uncharacterized protein	yes		no			-0.2427		-1.30818		-1.17111				-0.306734	-0.178665	-1.15508	-1.46128	-0.93727	-1.40495
Q2G1Q4_C1008	Q2G1Q4	VYFVIGTDNTQDGAVNWSUEKPNLLNVAVTR	SAOUHSC_00049	Uncharacterized protein	no		no			-0.492946		-1.19256		-1.03857				-0.616614	-0.369278	-1.11967	-1.26545	-1.04982	-1.02732
Q2FWM9_C146	Q2FWM9	EHEFLTAGEYVAEPFQLSDGTYVTQLIUYDLR	SAOUHSC_02259	Uncharacterized protein	no		no	-0.982728		-1.04685		-0.133819		-0.571013		-0.842335	-1.12312	-1.22361	-0.870097	-0.101443	-0.166195	-0.479955	-0.662072
Q2FZ75_C94	Q2FZ75	TLESIGUDLLVIR	pyrB	Aspartate carbamoyltransferase	no		no	-1.46198		-1.27883						-1.24219	-1.68177	-1.45478	-1.10287
Q2G2U9_C9	Q2G2U9	INDUFELLSMVTYADK	sarA	Transcriptional regulator SarA	yes	Functional site	no	0.215895		-0.621455		-1.41308		-0.922788		0.321733	0.110057	-0.69515	-0.547761	-1.43926	-1.3869	-0.789359	-1.05622
Q2G240_C33	Q2G240	TGUSASTIR	SAOUHSC_00706	Uncharacterized protein	no	Functional site	no	0.49904		-0.663415		-1.14305		-1.43654		0.651775	0.346305	-0.740987	-0.585843	-1.16696	-1.11913	-1.2129	-1.66018
Q2FY08_C344	Q2FY08	VTLAFLUDAYDEEGVEGSK	glyQS	Glycine--tRNA ligase	yes		no	-0.547249		0.0236258		-1.22967		-0.993873		-0.33763	-0.756867	-0.00118459	0.0484362	-1.211	-1.24835	-0.986159	-1.00159
Q2G0Y6_C248	Q2G0Y6	AIGDQLTUIFVDHGLLR	guaA	GMP synthase [glutamine-hydrolyzing]	yes		no	-0.847579		-0.0953858		-0.981972		-0.839193		-0.808288	-0.886869	-0.168318	-0.0224535	-1.00277	-0.961171	-0.817409	-0.860976
O06446_C840	O06446	FKNUHGK	secA1	Protein translocase subunit SecA 1	yes	Functional site	no	-0.296133		0.210356		-0.822728		-1.87001		-0.14366	-0.448607	0.118891	0.301822	-0.723491	-0.921964	-1.75307	-1.98696
Q2G2D2_C251	Q2G2D2	ISVFSENNDIDAVGAUVGAK	nusA	Transcription termination/antitermination protein NusA	yes		no	-0.568093		-0.326771		-0.869113		-1.01948		-0.348317	-0.787869	-0.449158	-0.204383	-0.991435	-0.746792	-0.979743	-1.05922
P95689_C323	P95689	VILUTGDIGFSASK	serS	Serine--tRNA ligase	yes		no	-0.561226		-0.200838		-0.800064		-1.23304		-0.471865	-0.650586	-0.520372	0.118697	-0.882809	-0.717319	-1.18093	-1.28515
Q2FZ03_C54	Q2FZ03	VGPLETTVQGNMNEULILIQSLNER	SAOUHSC_01268	Uncharacterized protein	no		no	-0.754806		-0.522183		-0.492803		-1.05078		-0.594138	-0.915473	-0.667447	-0.37692	-0.443085	-0.542521	-0.950899	-1.15066
Q2FXU7_C135	Q2FXU7	VHLMKEULDR	SAOUHSC_01735	Uncharacterized protein	no		no	-1.28677		-0.475688		-1.08253				-1.12649	-1.44705	-0.810359	-0.141016	-1.35649	-0.808564
Q2FVZ4_C70	Q2FVZ4	LPYTLUYISR	femX	Lipid II:glycine glycyltransferase	yes		no	-0.433946		-1.24463		-0.560329		-0.612842		-0.280597	-0.587294	-1.43358	-1.05568	-0.518701	-0.601956	-0.586081	-0.639602
Q2FY68_C100	Q2FY68	QQLEUQNPVAR	proC	Pyrroline-5-carboxylate reductase	no		no	-0.169962		-0.478912		-1.12368		-1.08433		0.00216242	-0.342086	-0.475956	-0.481868	-1.18367	-1.06368	-1.04157	-1.12708
Q2FYI6_C8	Q2FYI6	FQLLAVUPMGLEAVVAR	SAOUHSC_01460	Uncharacterized protein	no		no	-1.21494		-1.64362						-1.41219	-1.01768	-1.60117	-1.68608
Q2G0M8_C113	Q2G0M8	GTEAAIAYQSGFNUNMAAISAVMNK	SAOUHSC_00532	Uncharacterized protein	no		no	-1.56024		-1.29843						-1.40515	-1.71534	-1.55021	-1.04665
Q2FZ02_C453	Q2FZ02	YEGQTVTVLUEGSSK	miaB	tRNA-2-methylthio-N(6)-dimethylallyladenosine synthase	no		no	-0.770745		-0.35488		-0.654578		-1.10228		-0.64749	-0.894	-0.459834	-0.249925	-0.487621	-0.821534	-1.17697	-1.02759
Q2FYG4_C48	Q2FYG4	VAULTIDTSMR	SAOUHSC_01488	Uncharacterized protein	no		no	-0.322882		-0.887938		-0.780842		-0.895199		-0.190092	-0.455673	-0.928539	-0.847336	-0.776256	-0.785428	-0.761604	-1.02879
Q2FWC7_C246	Q2FWC7	GUKPYYVENGAFSGAIGALYLEK	coaW	Type II pantothenate kinase	yes		no	-0.125034		-0.329512		-1.27194		-1.21061		0.15069	-0.400758	-0.190833	-0.468192	-1.26105	-1.28282	-1.21695	-1.20427
P60393_C27	P60393	ENGVYIDUTLGGAGHALYLLNQLNDDGR	rsmH	Ribosomal RNA small subunit methyltransferase H	no		no	-0.59349		-0.66386		-0.876005		-0.805182		-0.574498	-0.612483	-0.685779	-0.641941	-0.873529	-0.878481	-0.846091	-0.764273
Q2FXF8_C271	Q2FXF8	EUAEYDIDFK	SAOUHSC_01890	Uncharacterized protein	no		no	-1.52476		0.312257		-0.693806		-1.03838		-1.4347	-1.61482	0.89507	-0.270556	-0.699162	-0.68845	-0.686824	-1.38994
Q2FZH8_C331	Q2FZH8	LINGALNILSSEGTLLLUTNASVYPLK	SAOUHSC_01026	Uncharacterized protein	no		no	-1.24698		-1.71071						-1.42248	-1.07148	-1.6574	-1.76401
Q2FWK6_C358	Q2FWK6	FLEULNDKNVETIEHSDWVK	SAOUHSC_02282	Acetolactate synthase	no		no					-1.00062		-1.95805						-0.81203	-1.18922	-1.93451	-1.98159
Q2FZC8_C377	Q2FZC8	GLFAAGEUDFSQHGGNR	SAOUHSC_01104	Succinate dehydrogenase, flavoprotein chain TC0881, putative	no		no	-0.563607		-0.918007		-0.654739		-0.825999		-0.447918	-0.679296	-1.08816	-0.747851	-0.797438	-0.51204	-0.786771	-0.865227
Q2FY52_C271	Q2FY52	KADUNEK	SAOUHSC_01613	2-oxoisovalerate dehydrogenase, E1 component, alpha subunit, putative	no		no	-1.01104		-0.489993		-0.514965		-0.951416		-0.855666	-1.16641	-0.840242	-0.139744	-0.52587	-0.504059	-0.94034	-0.962491
Q2G149_C137	Q2G149	LDUAEIIR	SAOUHSC_00306	Uncharacterized protein	no		no	-0.234844		0.429209		-0.918362		-2.25289		0.0938306	-0.563518	0.273456	0.584963	-0.824903	-1.01182	-2.18515	-2.32063
Q2FXP3_C31	Q2FXP3	EUENCGTR	nrdR	Transcriptional repressor NrdR	no		no			0.461054		-1.33546		-2.10435				0.272262	0.649845	-1.14127	-1.52966	-1.79236	-2.41635
Q2FYY6_C210	Q2FYY6	YADAVTAUDNIQTFK	SAOUHSC_01287	Glutamine synthetase	yes		no	-0.849977		-0.411402		-0.940937		-0.787558		-0.684434	-1.01552	-0.828563	0.00575927	-0.943195	-0.93868	-0.700873	-0.874243
Q2FXZ3_C149	Q2FXZ3	DVTUETCHGDGAKPGTSK	dnaJ	Chaperone protein DnaJ	yes	Functional site	no	0.165686		-0.0723246		-1.40757		-1.68741		0.349564	-0.0181915	-0.151209	0.00655948	-1.33905	-1.4761	-1.67258	-1.70223
Q9ZAH5_C358	Q9ZAH5	QHTINYEVLUNLSR	alr1	Alanine racemase 1	no		no			-0.969821		-0.83855		-1.21763				-1.15454	-0.785104	-0.901634	-0.775466	-1.18367	-1.25159
Q2FYS9_C314	Q2FYS9	ATIANMAPEYGATUGFFPVDDESLK	SAOUHSC_01347	Aconitate hydratase	no		no	-0.86393		-0.792113		-0.697173		-0.677903		-0.736605	-0.991255	-0.947139	-0.637087	-0.718972	-0.675374	-0.616459	-0.739348
Q2FVP8_C283	Q2FVP8	GFGNTTTSIPGIYAUGDIVYHDAK	SAOUHSC_02654	Ferredoxin--NADP reductase	no	Functional site	no	-0.736227		-0.139029		-0.841479		-1.31463		-0.483213	-0.98924	-0.237354	-0.0407046	-0.938202	-0.744755	-1.22133	-1.40792
Q2G0N7_C69	Q2G0N7	IADVGUGYGPIGLMIAK	SAOUHSC_00523	Uncharacterized protein	no		no	-0.412827		-0.458341		-1.15492		-1.00833		-0.287307	-0.538346	-0.468212	-0.448469	-1.14009	-1.16974	-0.914358	-1.10231
Q2G2D3_C52	Q2G2D3	EGGVDLNDUTLASEK	rimP	Ribosome maturation factor RimP	no		no	-0.567673		-0.650771		-0.830256		-0.994415		-0.494993	-0.640352	-0.885598	-0.415945	-0.922358	-0.738154	-0.965078	-1.02375
Q2G0G6_C194	Q2G0G6	ENEAVLQYUVDHQITFIPYFPLASGILAGK	SAOUHSC_00603	Uncharacterized protein	no		no	-1.21935		-0.604455		-0.55974		-0.701921		-1.04213	-1.39657	-0.918006	-0.290904	-0.663945	-0.455534	-0.661022	-0.74282
Q2FYZ0_C82	Q2FYZ0	DQGFVILGFPCNQFGGQEPGSGEEAAQNUK	SAOUHSC_01282	Glutathione peroxidase	no		no			0.317572		-1.1322		-2.28422			2.87067	0.282499	0.352646	-1.009	-1.25539	-2.34359	-2.22486
Q2FXT9_C251	Q2FXT9	VLNDQUPTSVK	SAOUHSC_01744	Uncharacterized protein	no		no	-0.270726		-0.251644		-1.09249		-1.4851		-0.161944	-0.379507	-0.341958	-0.161331	-1.07759	-1.1074	-1.22722	-1.74299
Q2FXR4_C264	Q2FXR4	VGYHCAQGYFGVTPDLTULGK	hemL1	Glutamate-1-semialdehyde 2,1-aminomutase 1	no		no	-0.955605				-1.04911		-1.10081		-0.772801	-1.13841			-1.13119	-0.967025	-1.04615	-1.15547
Q2G1J4_C176	Q2G1J4	IIGGVTEAUIEAGKR	SAOUHSC_00128	Cap5O protein/UDP-N-acetyl-D-mannosaminuronic acid dehydrogenase	no		no	0.720203		-0.0013155		-1.87138		-1.95968		0.890096	0.55031	-0.116598	0.113967	-1.82726	-1.9155	-1.89813	-2.02122
Q2FVI4_C61	Q2FVI4	NNGDLAGILGLUIPELDGK	SAOUHSC_02726	Positive transcriptional activator, putative	no		no							-3.11863								-3.31402	-2.92325
Q2FWM1_C451	Q2FWM1	QLQIFVDTSSIEIFUNDGER	SAOUHSC_02268	Invertase	no		no			-1.36153		-0.841184		-0.916208				-1.34329	-1.37977	-0.796335	-0.886033	-1.15162	-0.680798
Q2FXZ3_C192	Q2FXZ3	TEQVUPK	dnaJ	Chaperone protein DnaJ	yes	Functional site	no	-0.69856		-0.0362105		-1.01458		-1.38375		-0.610886	-0.786234	-0.177294	0.104873	-1.21349	-0.815678	-1.21615	-1.55135
Q2FWZ3_C74	Q2FWZ3	VAPPUIYYER	SAOUHSC_02113	RNA methyltransferase, TrmA family, putative	no		no					-1.87963		-1.25425						-1.72456	-2.03469	-1.35384	-1.15467
Q2FX89_C23	Q2FX89	TUAGTNTHLHLIK	SAOUHSC_01988	Putative tRNA (cytidine(34)-2'-O)-methyltransferase	no		no	-1.01722		-0.793566		-0.486274		-0.838602		-0.862942	-1.1715	-0.869464	-0.717667	-0.678409	-0.294138	-0.658561	-1.01864
Q2FUZ8_C299	Q2FUZ8	HIEFLLDDFSESYEPGDUIVALPQNDPELVEK	SAOUHSC_02947	Sulfite reductase [NADPH] flavoprotein alpha-component	no		no	-1.90661		0.467609		-0.727733		-0.973621		-1.70976	-2.10346	0.23008	0.705137	-0.782993	-0.672474	-0.998183	-0.94906
Q2FXK8_C145	Q2FXK8	DNDELYDKUK	ezrA	Septation ring formation regulator EzrA	yes		no	-1.10886				-1.03395		-1.00549		-0.955004	-1.26271			-1.35137	-0.716529	-1.22918	-0.781802
Q2G116_C40	Q2G116	IKCENUQR	SAOUHSC_00345	Uncharacterized protein	yes		no			-0.232137		-1.06216		-1.86538				-0.50271	0.0384362	-1.06031	-1.06401	-1.78901	-1.94175
Q2G1E6_C10	Q2G1E6	VGIIGUGGIANGK	SAOUHSC_00179	Uncharacterized protein	no		no	-0.514841		-1.26866		-0.758081		-0.691689		-0.304665	-0.725017	-1.51486	-1.02245	-0.989564	-0.526598	-0.484893	-0.898484
Q2FZ05_C106	Q2FZ05	AKPVKPEGUHAQLIELPFTATAK	SAOUHSC_01266	Uncharacterized protein	no		no	-0.152684		-1.41201		-0.734753		-0.936533		-0.188019	-0.117349	-1.49362	-1.33039	-0.491896	-0.977611	-1.03277	-0.840293
Q2FYW6_C197	Q2FYW6	YUDVFYIGGTK	SAOUHSC_01307	Uncharacterized protein	no		no	-3.24557								-2.88673	-3.60442
Q2FXG0_C124	Q2FXG0	IITIQUSQHINNQLVK	SAOUHSC_01888	Riboflavin synthase, alpha subunit	no		no			-2.21254				-1.04072				-2.2327	-2.19238			-0.845624	-1.23582
Q2G1Y6_C408	Q2G1Y6	VQUEVPQENAGAVIESLGAR	SAOUHSC_01058	GTP-binding protein TypA, putative	no		no	-0.291549		-0.619464		-1.21919		-1.15606		-0.0922171	-0.490882	-0.759918	-0.47901	-1.24175	-1.19664	-1.05565	-1.25646
Q2FVT0_C55	Q2FVT0	GYNITGVUTSNK	rpiA	Ribose-5-phosphate isomerase A	yes		no	-0.417298		-0.2652		-1.06269		-1.54372		-0.269373	-0.565224	-0.277619	-0.252782	-0.98285	-1.14252	-1.46693	-1.62052
Q2G1C7_C72	Q2G1C7	GDVIGIFAPNDIAILDLLFAUFK	SAOUHSC_00198	Uncharacterized protein	no		no	-0.931776		-0.896988		-0.748792		-0.724913		-0.784135	-1.07942	-1.02172	-0.772259	-0.788907	-0.708678	-0.711464	-0.738361
Q2FYQ2_C361	Q2FYQ2	DTGAFUASPYFTHSYVFISWTGK	SAOUHSC_01383	Uncharacterized protein	no		no	-1.12044		-0.928353		-0.801462		-0.456144		-1.00222	-1.23865	-1.02304	-0.83367	-0.669816	-0.933108	-0.405012	-0.507275
Q2FXV6_C352	Q2FXV6	AITPGQAVVFYQGDVULGGATIDDVFK	mnmA	tRNA-specific 2-thiouridylase MnmA	yes		no	-0.706573		-0.476214		-1.0513		-1.0817		-0.535081	-0.878065	-0.513265	-0.439163	-1.135	-0.967601	-1.09314	-1.07027
Q2FYN7_C53	Q2FYN7	VIFUEADDWKPFYEAYGSQFEDIEIEMDRR	dapH	2,3,4,5-tetrahydropyridine-2,6-dicarboxylate N-acetyltransferase	no		no	-1.50943		-1.07034		-0.740852				-1.1787	-1.84016	-1.26889	-0.871786	-0.806998	-0.674706
Q2G0M0_C62	Q2G0M0	WSFQTEMFFLUNR	SAOUHSC_00540	Uncharacterized protein	no		no	-0.707625		-0.954967		-0.92047		-0.747598		-1.01138	-0.403866	-0.868279	-1.04165	-0.877155	-0.963785	-0.698459	-0.796736
Q2FZ22_C47	Q2FZ22	MDUEIAVIVGGGNIWR	pyrH	Uridylate kinase	yes		no	-0.209103		0.0136439		-1.33758		-1.798		-0.153924	-0.264283	0.0927487	-0.0654609	-1.36002	-1.31514	-1.75985	-1.83614
Q2FZ38_C26	Q2FZ38	EVTQLINAVNTIEELENHEUFLDER	rnhB	Ribonuclease HII	no		no			-1.04602		-1.01891		-1.27617				-1.17101	-0.921035	-1.02169	-1.01613	-1.33326	-1.21907
Q2FZU6_C363	Q2FZU6	PYCEALKEEGLLUK	rocD	Ornithine aminotransferase	no		no	-1.53154		-0.684803		-0.416318		-0.709442		-1.27998	-1.78309	-0.764209	-0.605396	-0.351909	-0.480727	-0.609309	-0.809574
Q2FXV0_C25	Q2FXV0	EGQGUISLK	SAOUHSC_01732	Uncharacterized protein	no		no	-0.178247		-1.33475		-0.941507		-0.891709		0.000978536	-0.357473	-1.48813	-1.18137	-0.963403	-0.919612	-0.795861	-0.987557
Q2FWG7_C56	Q2FWG7	SIAENEGVNDTLVIELAULLHDTVDEK	SAOUHSC_02324	Uncharacterized protein	no		no	-1.07155		-0.512509		-1.02156		-0.752864		-1.27976	-0.863342	-0.683415	-0.341604	-1.09662	-0.946499	-0.638344	-0.867384
Q2FVV7_C247	Q2FVV7	AUHETVLK	SAOUHSC_02584	Uncharacterized protein	no		no	-0.60194		-0.657879		-1.12023		-0.990419		-0.556096	-0.647784	-0.767953	-0.547805	-1.08033	-1.16014	-0.962604	-1.01824
Q2FXJ0_C368	Q2FXJ0	VFLUEIFGSIR	murC	UDP-N-acetylmuramate--L-alanine ligase	yes		no	-1.37815		-0.216889		-0.871312		-0.907768		-1.19689	-1.55942	-0.312003	-0.121775	-0.845838	-0.896786	-0.904358	-0.911177
Q2FVT5_C14	Q2FVT5	GLSIEUK	hutU	Urocanate hydratase	no		no	-1.02283		-0.628673		-0.789645		-0.944502		-0.827292	-1.21838	-0.804648	-0.452699	-0.824026	-0.755265	-0.918211	-0.970793
Q2G0N5_C48	Q2G0N5	DGLFUER	rpoC	DNA-directed RNA polymerase subunit beta'	yes		no	-0.926001		-0.731531		-0.576837		-1.16633		-0.773765	-1.07824	-0.935077	-0.527985	-0.733094	-0.42058	-1.09332	-1.23934
Q2FYK5_C247	Q2FYK5	EUGLEVGEFVHTFGDAHIYSNHIDAIQTQLAR	thyA	Thymidylate synthase	yes		no	-1.03047		-0.898814		-0.770233		-0.710187		-0.774923	-1.28602	-0.975737	-0.821891	-0.746083	-0.794382	-0.639737	-0.780636
Q2G1U3_C586	Q2G1U3	NAGVDMTTPEPIEQAUEVFEQK	SAOUHSC_00937	Oligoendopeptidase F	no		no	-1.80961		-1.62275						-1.7219	-1.89733	-1.87276	-1.37273
Q2FY36_C88	Q2FY36	DQPVYLUDANGIASYR	SAOUHSC_01630	Uncharacterized protein	no		no	-0.693029		-0.611934		-0.984992		-1.14474		-0.338983	-1.04707	-0.4935	-0.730368	-0.852824	-1.11716	-1.0978	-1.19169
Q2FWD1_C229	Q2FWD1	IALFUDINK	pyrG	CTP synthase	yes	Functional site	no	-0.650405		-0.656099		-1.2305		-0.915247		-0.390226	-0.910583	-0.910432	-0.401767	-1.40823	-1.05277	-0.951987	-0.878507
Q2FY68_C244	Q2FY68	GGTTQAGLDTLSQYDLVSIFEDULNAAVDR	proC	Pyrroline-5-carboxylate reductase	no		no	-0.829285		-0.864032		-0.934636		-0.830631		-0.755965	-0.902605	-0.916262	-0.811802	-1.03904	-0.830229	-0.811042	-0.85022
Q2FXT6_C308	Q2FXT6	FADDLRPLDENCDUYTCQNYSR	tgt	Queuine tRNA-ribosyltransferase	no	Functional site	no			-0.784045		-1.58495		-1.12127				-0.876334	-0.691756	-1.5441	-1.6258	-0.745575	-1.49696
Q2FWK6_C352	Q2FWK6	VIHVDLGIIADUKR	SAOUHSC_02282	Acetolactate synthase	no		no	-1.073		0.452205		-1.33176		-1.53985		-0.841741	-1.30426	0.339594	0.564817	-1.49957	-1.16395	-1.50451	-1.57519
Q2FXU7_C92	Q2FXU7	LINPDUK	SAOUHSC_01735	Uncharacterized protein	no		no	-0.745611		-0.460315		-1.12707		-1.16699		-0.641452	-0.84977	-0.617464	-0.303165	-1.13005	-1.12409	-1.07439	-1.25958
Q2G241_C108	Q2G241	AYKUYMTEEELEAER	gltX	Glutamate--tRNA ligase	yes		no	-1.7436		-1.61946		-0.145223				-1.77414	-1.71306	-1.99706	-1.24185	0.0200577	-0.310504
Q2FZ19_C233	Q2FZ19	LIVSUYASNFIR	rnj2	Ribonuclease J 2	yes		no	-0.388169		-1.35753		-0.936207		-0.840239		-0.259495	-0.516842	-1.49622	-1.21883	-0.889423	-0.98299	-0.778358	-0.90212
Q2FWX8_C339	Q2FWX8	VASEGVUVIF	SAOUHSC_02143	Uncharacterized protein SAOUHSC_02143	no		no	-1.64128				-0.851938		-1.03237		-1.50255	-1.78002			-0.926235	-0.777641	-0.94511	-1.11964
Q2G144_C54	Q2G144	QLNAPSDIEVEHSDIMTASPEMADLFIUGR	SAOUHSC_00311	Uncharacterized protein	no		no	-1.08427		-0.969296		-1.4765				-0.874825	-1.29371	-1.02882	-0.90977	-1.47927	-1.47373
Q2FXH3_C63	Q2FXH3	NEIYYIVUAGGVR	SAOUHSC_01874	Uncharacterized protein	no		no	-3.53205								-3.16773	-3.89636
Q2FWC4_C125	Q2FWC4	VVVLGUPAEEGGENGSAK	SAOUHSC_02374	Aminobenzoyl-glutamate utilization protein B, putative	no		no	-1.37427		-0.617438		-0.728165		-0.812538		-1.3606	-1.38794	-0.829921	-0.404955	-0.755551	-0.700779	-0.613344	-1.01173
Q2G2G7_C134	Q2G2G7	VULDHMKPDKPFIK	SAOUHSC_01054	UPF0637 protein SAOUHSC_01054	no		no	-1.66536		-1.025		-0.857114				-1.4972	-1.83352	-1.10476	-0.945249	-1.28842	-0.425811
Q2G0N5_C896	Q2G0N5	SAFTUNAR	rpoC	DNA-directed RNA polymerase subunit beta'	yes		no	-0.311803		-1.03817		-0.565396		-1.6346		-0.235042	-0.388563	-1.23223	-0.844121	-0.647151	-0.483642	-1.55788	-1.71132
Q2FVC2_C60	Q2FVC2	EIREEMKUDLIVGDK	SAOUHSC_02791	Pyrophosphohydrolase, putative	yes		no	-1.40754		-1.06197		-1.08457				-1.31581	-1.49928	-1.25818	-0.865753	-1.18295	-0.986188
Q2FWD3_C161	Q2FWD3	EUQELVEK	SAOUHSC_02366	Uncharacterized protein	yes		no	-1.23637		-0.591466		-0.903478		-0.827877		-0.966551	-1.50619	-0.745514	-0.437418	-0.940772	-0.866184	-0.756983	-0.898772
Q2FVN3_C13	Q2FVN3	QLUFLFYVSSK	sarZ	HTH-type transcriptional regulator SarZ	no		no	-1.30123		-1.33649		-0.0353612		-0.926422		-1.07826	-1.52421	-1.55728	-1.11569	0.0592168	-0.129939	-0.91836	-0.934483
Q2FXU7_C235	Q2FXU7	GQMPPSSNAFVPSVVGLIUASYVVNDVLK	SAOUHSC_01735	Uncharacterized protein	no		no	-1.12188		-0.405543		-1.02503		-1.05106		-0.97932	-1.26443	-0.515942	-0.295144	-1.22134	-0.82872	-0.911886	-1.19024
Q2FZ97_C103	Q2FZ97	EUTVIGVSNR	mraZ	Transcriptional regulator MraZ	no		no			-1.46894		-1.28791		-0.85566				-1.47481	-1.46307	-1.08642	-1.4894	-0.477161	-1.23416
Q2FZ92_C350	Q2FZ92	ATNTLATQFALNSFNQPIIWLUGGLDR	murD	UDP-N-acetylmuramoylalanine--D-glutamate ligase	yes		no	-0.733375		-0.0319653		-1.72473		-1.12518		-0.685245	-0.781504	-0.108954	0.0450235	-1.63536	-1.81411	-1.07485	-1.1755
Q2FZ82_C886	Q2FZ82	VVDKLDDQATAYEHGDIVIEHADGEKUER	ileS	Isoleucine--tRNA ligase	yes	Functional site	no	-1.21232		-0.562935		-1.01516		-0.828822		-1.00035	-1.4243	-0.608078	-0.517792	-1.01435	-1.01596	-0.674683	-0.982962
Q2G2L0_C124	Q2G2L0	LDSLLNFPETUPHGGVIPR	SAOUHSC_00638	Uncharacterized protein	no		no	-0.806352		-1.61607		-0.893625		-0.305507		-0.638726	-0.973979	-1.85251	-1.37962	-0.65179	-1.13546	-0.508362	-0.102651
Q2G258_C48	Q2G258	VIDQLKLEGUK	birA	Bifunctional ligase/repressor BirA	yes		no	-0.72322		-0.414792		-1.33862		-1.1468		-0.642594	-0.803846	-0.541661	-0.287924	-1.27495	-1.40228	-1.08467	-1.20893
Q2G2S7_C228	Q2G2S7	GULLIEGDHLK	SAOUHSC_01975	Uncharacterized protein	no		no	-1.74591				-1.14663		-0.735746		-1.46562	-2.02621			-1.12939	-1.16388	-0.731685	-0.739806
Q2FZH4_C15	Q2FZH4	SEIIVYTQNDCPPUTFVK	SAOUHSC_01030	Uncharacterized protein	no		no	-0.0584185		-1.19445		-2.37738				-0.100252	-0.016585	-1.2439	-1.145	-2.48608	-2.26868
Q2FWM1_C320	Q2FWM1	VLIGWMGLPEIEYPTDNEGWAHULTIPR	SAOUHSC_02268	Invertase	no		no	-1.63967		-1.16516				-0.837456		-1.45443	-1.8249	-1.36045	-0.969876			-0.90026	-0.774651
Q2FYI6_C197	Q2FYI6	GDTPLIDPFUGSGTIAIEACLIAQNIAPGFNR	SAOUHSC_01460	Uncharacterized protein	no		no	-1.00647		-1.17839		-0.71617		-0.742862		-0.892366	-1.12058	-1.28254	-1.07423	-0.878305	-0.554034	-0.664321	-0.821403
D4P541_C69	D4P541	EIGEFSEHHFYUAIFIPSTEDHAYQLEK	traP	Target of RNAIII-activating protein	no		no	-1.58986		-1.15244		-0.909158				-1.56345	-1.61626	-1.33399	-0.970893	-0.865017	-0.953299
Q2FXK7_C102	Q2FXK7	TQIVADVHQFEGHIAUDANSK	SAOUHSC_01828	GAF domain protein	no		no	0.86943		-0.47245		-1.75454		-2.30846		0.987898	0.750963	-0.622299	-0.3226	-1.6589	-1.85017	-2.33672	-2.28019
Q2G2C1_C259	Q2G2C1	IUDAAIQLMENIK	SAOUHSC_01064	Pyruvate carboxylase	no		no	-1.31331		-0.489388		-0.879405		-1.00617		-1.117	-1.50963	-0.60165	-0.377126	-0.925577	-0.833233	-0.844354	-1.16799
Q2FZM1_C69	Q2FZM1	VAGUIISYSGENELKYEK	SAOUHSC_00979	Uncharacterized protein	no		no	-0.1578		-0.754211		-1.67199		-1.10573		-0.0571065	-0.258494	-0.729124	-0.779299	-1.5133	-1.83069	-0.951541	-1.25991
Q2G227_C177	Q2G227	TGDLIVYTSADPVLQIAAHEDIIPLEELYDIUEK	deoB	Phosphopentomutase	no		no	-1.43143		-1.49812				-0.777196		-1.184	-1.67886	-1.80043	-1.19581			-0.778259	-0.776133
Q2G1W2_C273	Q2G1W2	NGVFNIEGGUYAK	pckA	Phosphoenolpyruvate carboxykinase (ATP)	no		no			-1.59928		-1.11565		-0.998461				-1.73485	-1.46371	-1.03091	-1.20038	-0.958589	-1.03833
Q2G0T9_C320	Q2G0T9	GIYDGGGWNAIFWUNHDQPR	SAOUHSC_00438	Alpha amylase family protein, putative	no		no	-1.06875		-1.14398		-0.853219		-0.651989		-0.956739	-1.18076	-1.16207	-1.12589	-0.839054	-0.867384	-0.505738	-0.798241
Q2FYP2_C219	Q2FYP2	HFLNNVUTHIADLDFGK	SAOUHSC_01392	ABC transporter, ATP-binding protein, putative	no		no			-1.16089		-1.56274		-1.02146				-1.36268	-0.959094	-1.71118	-1.41431	-1.05538	-0.987531
Q2FZC8_C296	Q2FZC8	EIFDVUINQK	SAOUHSC_01104	Succinate dehydrogenase, flavoprotein chain TC0881, putative	no		no	0.0192342		-1.1484		-1.43331		-1.19911		0.195096	-0.156627	-1.29637	-1.00043	-1.44062	-1.42601	-1.17811	-1.22011
Q2FYR1_C102	Q2FYR1	YLQQHQULYVK	femB	Aminoacyltransferase FemB	yes		no	-0.381422		-1.34917		-0.98786		-1.04506		-0.222296	-0.540547	-1.49984	-1.19849	-1.03774	-0.937983	-1.03616	-1.05397
Q2G157_C88	Q2G157	EVDELIESQUEVIALDATLQQRPK	nanE	Putative N-acetylmannosamine-6-phosphate 2-epimerase	no		no			-0.666324		-1.32654		-1.78957				-0.768469	-0.564179	-1.35461	-1.29846	-1.6898	-1.88934
Q2FVT5_C204	Q2FVT5	IDTKYUDVK	hutU	Urocanate hydratase	no		no	-1.16363				-1.1897		-1.43428		-1.0048	-1.32247			-1.32536	-1.05403	-1.34472	-1.52384
P60430_C188	P60430	MILSTUR	rplB	50S ribosomal protein L2	yes		no	-0.472921		-1.10105		-1.14797		-1.06961		-0.43374	-0.512102	-1.14089	-1.06121	-1.20002	-1.09591	-1.06567	-1.07355
Q2FXH9_C155	Q2FXH9	IHMIIGTDEESDWKUTDR	SAOUHSC_01868	Putative dipeptidase SAOUHSC_01868	no	Functional site	no	-1.19018		-1.36983		-1.25611				-1.02248	-1.35789	-1.44768	-1.29198	-1.2783	-1.23392
Q2FYY6_C309	Q2FYY6	LVPGYEAPUYIAWSGK	SAOUHSC_01287	Glutamine synthetase	yes		no	-0.612555		-0.65748		-1.51551		-1.0378		-0.531302	-0.693808	-0.697196	-0.617764	-1.50095	-1.53007	-1.03159	-1.044
Q2FZL5_C129	Q2FZL5	GYAVGGGNVLNVVUDLTIAADNAIFGQTGPK	menB	1,4-dihydroxy-2-naphthoyl-CoA synthase	no		no	-1.20172		0.103299		-1.00673		-1.73041		-1.07558	-1.32786	-0.080637	0.287236	-0.883955	-1.12951	-1.65535	-1.80546
Q2FVA5_C185	Q2FVA5	THDLDAAYQUYIEQLGFQHVSDFPR	SAOUHSC_02828	Uncharacterized protein	no		no	-1.80696		-1.22163		-0.339229		-0.473739		-1.62025	-1.99367	-1.40473	-1.03854	-0.814387	0.135929	-0.487803	-0.459675
Q2FXF9_C107	Q2FXF9	AHGIEVEUVDDER	SAOUHSC_01889	Riboflavin biosynthesis protein RibD	no		no			0.0125327		-1.30029		-2.56482				-0.188562	0.213627	-1.17007	-1.43051	-2.47682	-2.65281
Q2FWH3_C7	Q2FWH3	ENIUIVFGGK	ddl	D-alanine--D-alanine ligase	yes		no	0.252637		-0.227698		-1.82917		-2.05083		0.324235	0.181039	-0.360159	-0.0952377	-1.8438	-1.81454	-2.02046	-2.0812
Q2FXH9_C178	Q2FXH9	TEEMPTLGFAPDAEFPUIHGEK	SAOUHSC_01868	Putative dipeptidase SAOUHSC_01868	no	Functional site	no	-1.27593		-1.13994		-0.607892		-0.836907		-1.07991	-1.47195	-1.40874	-0.871142	-0.687185	-0.528599	-0.818096	-0.855719
Q2G1C6_C421	Q2G1C6	IIFSGTFVAGSHVSUHNQR	SAOUHSC_00199	Uncharacterized protein	no		no	0.20728		-0.37243		-2.03875		-1.66149		0.311968	0.102591	-0.433389	-0.31147	-2.05164	-2.02585	-1.47935	-1.84363
Q2FUQ4_C158	Q2FUQ4	LSVLSELULPLVK	rsmG	Ribosomal RNA small subunit methyltransferase G	no		no	-0.693774		-1.19478		-1.07305		-0.942407		-0.682577	-0.704971	-1.25656	-1.13299	-1.0594	-1.08669	-0.908226	-0.976588
Q2FVY0_C310	Q2FVY0	YLFGLSGNPSAUFTGFELFVKPAVK	SAOUHSC_02542	Molybdopterin biosynthesis protein moeA, putative	no		no	-1.09029		-0.773153		-0.930592		-1.11555		-0.94828	-1.23229	-0.894697	-0.651609	-0.934621	-0.926564	-1.21648	-1.01462
Q2FZ23_C23	Q2FZ23	TGAGMMDUK	tsf	Elongation factor Ts	yes		no	0.712381		-0.752845		-2.07189		-1.80939		0.888581	0.536181	-0.837648	-0.668042	-2.05763	-2.08614	-1.80239	-1.81639
Q2FXU2_C27	Q2FXU2	GYULLVGIGQNSTEQDADVIAK	dtd	D-aminoacyl-tRNA deacylase	yes		no	-0.679157		-0.904537		-1.04821		-1.29395		-0.512534	-0.84578	-1.04561	-0.763465	-1.05215	-1.04427	-1.23746	-1.35045
Q2G0J7_C174	Q2G0J7	LIDTSKHUIIK	ung	Uracil-DNA glycosylase	no		no	-0.240946		-1.17573		-0.876343		-1.65637		-0.128976	-0.352916	-1.37936	-0.97211	-1.01392	-0.73877	-1.80521	-1.50754
Q2FXR8_C774	Q2FXR8	FUNPSTLNISTDVEIPEK	valS	Valine--tRNA ligase	yes		no	-2.19317		-1.76024						-1.94004	-2.44631	-1.61057	-1.90991
Q2FVP8_C59	Q2FVP8	PUHEILKDTIK	SAOUHSC_02654	Ferredoxin--NADP reductase	no		no	-1.23782		-0.645038		-1.12782		-0.949715		-1.08737	-1.38828	-0.617211	-0.672865	-1.07412	-1.18151	-0.888889	-1.01054
Q2G052_C141	Q2G052	HTSFASUDVIPDFNNDEIEIEINPDDITVDTFR	prfB	Peptide chain release factor 2	yes		no	-1.42541		-1.13674		-0.91664		-0.485463		-1.36412	-1.48669	-1.17619	-1.0973	-0.864675	-0.968605	-0.745021	-0.225905
Q2FWX8_C328	Q2FWX8	ITLUDNTR	SAOUHSC_02143	Uncharacterized protein SAOUHSC_02143	no		no	-1.5866		-0.99882		-0.359193		-1.02305		-1.39358	-1.77962	-0.994728	-1.00291	-0.502987	-0.215399	-0.903684	-1.14242
Q2G0V7_C46	Q2G0V7	HLAAELNDQGFSUYAPNYPGHGLLLK	SAOUHSC_00417	Uncharacterized protein	no		no	-1.0517		-1.02073		-1.01487		-0.914091		-0.820285	-1.28311	-1.06208	-0.979373	-1.1497	-0.880046	-0.69867	-1.12951
Q2FWX8_C304	Q2FWX8	DFNIASSDDLLVUAHEQGDSVVTVFER	SAOUHSC_02143	Uncharacterized protein SAOUHSC_02143	no		no	-1.36141		-0.904563		-0.954546		-0.78189		-1.31908	-1.40373	-1.00107	-0.808058	-1.02756	-0.881534	-0.675051	-0.888728
Q2FXA4_C272	Q2FXA4	NFIYTPVGFVCEHLEVLYDNDYEUK	hemH	Ferrochelatase	no		no			-0.629916		-1.75039		-1.62795				-0.895985	-0.363846	-1.7815	-1.71928	-1.71255	-1.54334
Q2FY33_C203	Q2FY33	LFGANVILSQSGYTGEDGFEIYUNIDDTEK	gcvT	Aminomethyltransferase	no		no	-1.09437		-0.560748		-1.38355		-0.984881		-0.972931	-1.21581	-0.663625	-0.457871	-1.40423	-1.36286	-0.953774	-1.01599
Q2FYY6_C96	Q2FYY6	LIUDVYK	SAOUHSC_01287	Glutamine synthetase	yes		no	-1.15878		-0.884887		-1.09161		-0.895502		-1.06302	-1.25455	-0.934409	-0.835365	-0.932985	-1.25023	-0.849189	-0.941814
Q2G294_C48	Q2G294	MNMAYEUIDR	SAOUHSC_01846	Acetyl-CoA synthetase, putative	no		no	-1.64569		-1.47909		-0.911686				-1.49478	-1.79659	-1.53552	-1.42265	-1.01718	-0.806189
Q2FZU5_C286	Q2FZU5	ELFELDUDILVPAAISNQITEDNAHDIK	SAOUHSC_00895	Glutamate dehydrogenase	no		no	-0.468245		-2.41992		-0.489986		-0.672818		-0.22297	-0.713521	-2.82634	-2.01351	-0.393198	-0.586774	-0.710142	-0.635495
Q2G2P2_C345	Q2G2P2	QGYIGAEELQVFLANKPEIYIUGGTK	SAOUHSC_00204	Globin domain protein	no		no	-0.869639		-1.07888		-0.989039		-1.12658		-0.739305	-0.999973	-1.16067	-0.997086	-0.920086	-1.05799	-1.11555	-1.13761
Q2FY02_C95	Q2FY02	VLGDIIIUTDVAQEQANNYGHSFER	ybeY	Endoribonuclease YbeY	yes		no	-1.10226		-1.36341		-0.71545		-0.88505		-0.941365	-1.26316	-1.58632	-1.14051	-0.794082	-0.636818	-0.726663	-1.04344
Q2FZ65_C36	Q2FZ65	DKNEDAGGIFYNQTNQQLLVLUDGMGGHK	SAOUHSC_01186	Uncharacterized protein	no		no	-0.787348				-1.02635		-2.26366		-0.666118	-0.908578			-0.981309	-1.07139	-1.83542	-2.6919
Q2FYK5_C13	Q2FYK5	MLNSFDAAYHSLUEEVLEIGNTR	thyA	Thymidylate synthase	yes		no	-0.984443		-1.12653		-0.90749		-1.07239		-0.789013	-1.17987	-1.24811	-1.00494	-0.948753	-0.866226	-0.943527	-1.20124
Q2G2M3_C210	Q2G2M3	LVSDKUDFYIK	SAOUHSC_00513	Uncharacterized protein	no		no	-0.445195		-2.59614		-0.682577		-0.375686		-0.387865	-0.502526	-2.56448	-2.62781	-0.703971	-0.661182	-0.671026	-0.0803472
Q2G0G3_C250	Q2G0G3	GGEVLLNNULK	SAOUHSC_00606	Uncharacterized protein	no		no	-1.31686		-1.18258		-0.759702		-0.84492		-1.08423	-1.54949	-1.32173	-1.04344	-0.749551	-0.769853	-0.706359	-0.98348
Q2FZ75_C86	Q2FZ75	GESLYDTUK	pyrB	Aspartate carbamoyltransferase	no		no	-1.0733		-1.24925		-0.935287		-0.852746		-0.872312	-1.27429	-1.36208	-1.13642	-0.85692	-1.01365	-0.739105	-0.966388
Q2FY08_C422	Q2FY08	QDEIGTPYUVTFDFDSLEDNQVTVR	glyQS	Glycine--tRNA ligase	yes		no	-0.898076		-0.734387		-1.34639		-1.14274		-0.66621	-1.12994	-0.846686	-0.622087	-1.36014	-1.33264	-1.07536	-1.21012
Q2FXJ5_C37	Q2FXJ5	EQVTLYUGADPTADSLHIGHLLPFLTLR	tyrS	Tyrosine--tRNA ligase	yes	Functional site	no	-1.42442		-0.939658		-1.09836		-0.662998		-1.21746	-1.63138	-0.925988	-0.953327	-1.21478	-0.981936	-0.664631	-0.661365
Q2FWE4_C141	Q2FWE4	HVUVPVR	SAOUHSC_02355	UPF0340 protein SAOUHSC_02355	no		no	-1.05675		-1.20843		-0.963217		-0.904258		-0.936994	-1.17651	-1.51046	-0.906413	-1.00529	-0.921144	-1.1565	-0.652017
Q2G0Y6_C223	Q2G0Y6	VLUAMSGGVDSSVVAVLLHK	guaA	GMP synthase [glutamine-hydrolyzing]	yes	Functional site	no	-0.940923		-0.481449		-1.73768		-0.979143		-0.79755	-1.0843	-0.386336	-0.576562	-1.7117	-1.76366	-0.973469	-0.984816
Q2FXR8_C317	Q2FXR8	YEGMDRFDUR	valS	Valine--tRNA ligase	yes		no	-1.83242		-1.3726		-0.934745				-1.58779	-2.07704	-1.44798	-1.29721	-0.934317	-0.935172
Q2FYU6_C9	Q2FYU6	VNVTLAUTECGDR	rpmG1	50S ribosomal protein L33 1	no		no	-0.517568		-1.368		-1.06072		-1.22102		-0.331917	-0.70322	-1.38522	-1.35078	-1.14111	-0.980327	-1.17852	-1.26352
Q2G101_C44	Q2G101	SADDLUDYFK	SAOUHSC_00359	Phosphoglycerate mutase family protein	no		no	0.00571338		-0.492518		-1.46727		-2.21513		0.285816	-0.27439	-0.576734	-0.408301	-1.40473	-1.52982	-2.01929	-2.41097
Q2G2S0_C411	Q2G2S0	EELDEUFDPKHHLNQVDTIFER	purB	Adenylosuccinate lyase	no		no	-0.588945		-0.857106		-1.33797		-1.39915		-0.471049	-0.706841	-0.919779	-0.794432	-1.30861	-1.36732	-1.49643	-1.30187
Q2FY35_C379	Q2FY35	HFEIPYKQYUK	gcvPB	Probable glycine dehydrogenase (decarboxylating) subunit 2	no		no	-0.906708		-1.60187		-0.581443		-1.09564		-0.77175	-1.04167	-1.5766	-1.62715	-0.611318	-0.551568	-1.01567	-1.17562
Q2FYU7_C468	Q2FYU7	HUYKADPEYGK	katA	Catalase	no		no	0.929625		-0.882054		-2.0247		-2.21799		0.99406	0.86519	-0.939538	-0.824571	-2.05337	-1.99602	-2.07115	-2.36483
Q2G263_C150	Q2G263	QADAFUFTFIPLNVIDTFK	SAOUHSC_00096	Transcriptional regulator, GntR family, putative	no		no	-1.21379		-1.38873		-0.77061		-0.827287		-1.04451	-1.38308	-1.55199	-1.22546	-0.782596	-0.758624	-0.817867	-0.836707
Q2G296_C207	Q2G296	EDGFNITVASEIMAILULSR	fhs	Formate--tetrahydrofolate ligase	no		no	-0.814071		-1.7845		-0.89348		-0.728323		-0.701324	-0.926819	-1.95129	-1.6177	-0.903861	-0.883099	-0.748801	-0.707846
Q2G0B7_C166	Q2G0B7	ALAPLUDTK	SAOUHSC_00688	Cytokinin riboside 5'-monophosphate phosphoribohydrolase	no		no	-0.793457		-1.172		-1.20389		-1.05498		-0.658412	-0.928503	-1.22735	-1.11664	-1.28273	-1.12505	-1.06754	-1.04241
Q2FZ37_C102	Q2FZ37	LYIEEGUAIQK	sucC	Succinate--CoA ligase [ADP-forming] subunit beta	yes	Functional site	no	-0.549558		-1.11231		-1.58754		-0.980471		-0.440146	-0.658971	-1.15043	-1.07418	-1.67057	-1.50451	-0.965165	-0.995776
Q2G2A1_C69	Q2G2A1	TIHAEMNALLQUAK	SAOUHSC_01692	Uncharacterized protein	no		no	-0.0625203		-0.531817		-1.32385		-2.32661		0.159242	-0.284282	-0.568773	-0.494861	-1.22236	-1.42535	-2.08669	-2.56653
Q2FWE8_C193	Q2FWE8	DQGTIUIYVAIGQK	atpA	ATP synthase subunit alpha	no		no	-1.1713		-1.06581		-1.16737		-0.840693		-1.03466	-1.30793	-1.15216	-0.979459	-0.992833	-1.3419	-0.77327	-0.908117
Q2G045_C77	Q2G045	KLURPETPAIIVTR	hprK	HPr kinase/phosphorylase	yes		no	-0.808633		-1.56553		-0.995922		-0.880162		-0.674959	-0.942307	-1.80723	-1.32384	-0.924207	-1.06764	-1.12564	-0.634688
Q2FXA4_C276	Q2FXA4	VVUDDIGANYYRPK	hemH	Ferrochelatase	no		no	-1.04237		-0.00529202		-1.62574		-1.60353		-1.19962	-0.885127	-0.0332004	0.0226164	-1.57742	-1.67406	-1.58801	-1.61905
Q2G248_C259	Q2G248	GLSATIEEFVYAAEYIASQGNQNIILUER	SAOUHSC_01852	Uncharacterized protein	no		no	-1.53044		-1.62238		-0.56869		-0.583665		-1.43983	-1.62104	-1.69092	-1.55385	-0.522447	-0.614933	-0.554824	-0.612505
Q2G2C1_C98	Q2G2C1	RUAEEGIK	SAOUHSC_01064	Pyruvate carboxylase	no		no	-1.28544		-1.13938		-1.00064		-0.890861		-1.19849	-1.37239	-1.15082	-1.12794	-1.03691	-0.964376	-0.846688	-0.935034
Q2FYI6_C107	Q2FYI6	STLHSVPDUQAITK	SAOUHSC_01460	Uncharacterized protein	no		no	-0.886148		-1.54748		-0.959107		-0.927127		-0.790039	-0.982257	-1.55838	-1.53659	-0.994821	-0.923392	-0.896935	-0.957318
Q2FXM6_C152	Q2FXM6	IIDYUTENR	accD	Acetyl-coenzyme A carboxylase carboxyl transferase subunit beta	yes		no	-1.01963		-0.644364		-1.35923		-1.31222		-1.06897	-0.970303	-0.68221	-0.606518	-1.39286	-1.32561	-1.36082	-1.26361
Q2G0M7_C214	Q2G0M7	SPLEGYSVUVFPDSLDEGANIEIGYLPGR	hchA	Protein/nucleic acid deglycase HchA	no		no	-2.81412		-0.247223		-0.56394		-0.71669		-2.68344	-2.94481	-0.499234	0.00478774	-0.518452	-0.609428	-0.599222	-0.834159
Q2FY33_C91	Q2FY33	ALYTALUNEEGGIIDDLVIYK	gcvT	Aminomethyltransferase	no		no	-0.750013		-0.574099		-1.74519		-1.28005		-0.58955	-0.910475	-0.652584	-0.495614	-1.8038	-1.68659	-1.22418	-1.33592
Q2G2C1_C345	Q2G2C1	DITTLGYAIQUR	SAOUHSC_01064	Pyruvate carboxylase	no		no	-1.22579		-1.21496		-0.98877		-0.938986		-1.10609	-1.34549	-1.24612	-1.1838	-1.06918	-0.908361	-0.882438	-0.995535
P47768_C624	P47768	QVVSAATAUIPFLENDDSNR	rpoB	DNA-directed RNA polymerase subunit beta	yes		no	-2.03931				-1.19672		-1.14564		-1.85465	-2.22398			-1.26507	-1.12838	-1.05436	-1.23691
Q2FXG2_C92	Q2FXG2	GATSHYDYVUNEVAK	ribH	6,7-dimethyl-8-ribityllumazine synthase	no	Functional site	no	-0.986202		-1.52688		-1.46028		-0.424517		-0.811751	-1.16065	-1.37195	-1.68182	-1.55487	-1.36569	-0.435593	-0.413442
Q2G030_C40	Q2G030	EVESVIUAPAIQLDALTTAVK	tpiA	Triosephosphate isomerase	yes		no	-1.78254		-1.3774		-0.520621		-0.723317		-1.66948	-1.8956	-1.84094	-0.913868	-0.668779	-0.372463	-0.646967	-0.799666
Q2G296_C484	Q2G296	ENGWDNYPVUMAK	fhs	Formate--tetrahydrofolate ligase	no		no	-1.31142		-1.41509		-0.85571		-0.824454		-1.20869	-1.41414	-1.593	-1.23718	-0.835573	-0.875847	-0.747985	-0.900924
Q2FXU5_C8	Q2FXU5	TTYUGLVTEAFLGQEITLK	aspS	Aspartate--tRNA ligase	yes		no	-0.682716		-0.810865		-1.55777		-1.36074		-0.495308	-0.870124	-0.922101	-0.69963	-1.55648	-1.55907	-1.31204	-1.40943
Q2G087_C320	Q2G087	VNELYEALLNVGUITRPFPTGVR	hisC	Histidinol-phosphate aminotransferase	no		no	-1.46549		-1.28274		-1.08601		-0.578804		-1.33674	-1.59424	-1.328	-1.23749	-1.18554	-0.986473	-0.933325	-0.224284
Q2FXL5_C206	Q2FXL5	IISUHIGNGASIAAIDGGK	ackA	Acetate kinase	no	Functional site	no	-1.68087		-0.983459		-0.847079		-0.903511		-1.5048	-1.85695	-1.06531	-0.901607	-0.868411	-0.825747	-0.936055	-0.870968
Q2FYY6_C291	Q2FYY6	GFTAVUNPLVNSYK	SAOUHSC_01287	Glutamine synthetase	yes		no	-0.944672		-1.32038		-1.01527		-1.13811		-0.811878	-1.07747	-1.54726	-1.09351	-0.965324	-1.06521	-1.15144	-1.12479
Q2FZL5_C206	Q2FZL5	VEDETVQWUK	menB	1,4-dihydroxy-2-naphthoyl-CoA synthase	no		no	-1.13381		-0.522266		-1.15961		-1.68102		-1.03364	-1.23399	-0.767088	-0.277444	-1.16274	-1.15648	-1.63887	-1.72316
Q2FXE8_C198	Q2FXE8	ELFNVIQADEIGADIITUPADVVK	SAOUHSC_01901	Transaldolase	no		no	-1.18533		-1.09826		-1.04261		-1.18611		-1.0096	-1.36106	-1.32622	-0.870296	-1.11077	-0.974457	-1.20433	-1.16789
Q2FX94_C209	Q2FX94	YMLDRUETMLSESK	fumC	Fumarate hydratase class II	no		no	-2.13777		-1.42344		-0.956227				-1.94322	-2.33233	-1.5271	-1.31978	-1.01673	-0.895725
Q2G200_C17	Q2G200	IKDDILYUYTEDSIK	SAOUHSC_00941	UPF0738 protein SAOUHSC_00941	no		no	-1.44355		-1.17859		-1.05465		-0.881524		-1.39059	-1.49651	-1.23419	-1.12299	-1.08018	-1.02912	-0.816799	-0.946249
Q2FYJ2_C18	Q2FYJ2	VAUTPENVR	ald1	Alanine dehydrogenase 1	no		no	-1.12132		-1.14869		-1.16284		-1.12922		-0.84092	-1.40172	-1.43038	-0.867005	-1.14108	-1.18459	-1.15194	-1.1065
P47768_C593	P47768	FMDDEVVUR	rpoB	DNA-directed RNA polymerase subunit beta	yes		no	-1.76093		-1.9186		-0.89404				-1.48685	-2.03501	-2.21344	-1.62376	-1.32698	-0.4611
O34090_C204	O34090	MGWSDDIVTSYLDRDTLLPAIGQGALGIEUR	hemC	Porphobilinogen deaminase	no		no	-2.10211		-1.9177		-0.567221				-1.98575	-2.21847	-2.13822	-1.69717	-0.71111	-0.423333
Q2FWD1_C175	Q2FWD1	ENVMYVHUTLLPYIK	pyrG	CTP synthase	yes		no	-1.59237		-1.32295		-1.03431		-0.678236		-1.33706	-1.84768	-1.34183	-1.30406	-1.13005	-0.938569	-0.675742	-0.680729
Q2G0N5_C822	Q2G0N5	LVDVAQDVIVREEDUGTDR	rpoC	DNA-directed RNA polymerase subunit beta'	yes		no	-1.19482		-0.923769		-0.945988		-1.58728		-0.988885	-1.40075	-1.27844	-0.569094	-0.788116	-1.10386	-1.47129	-1.70327
Q2FWJ4_C217	Q2FWJ4	EIIQUTFIEGLSQK	SAOUHSC_02298	RNA polymerase sigma factor	no		no	-1.06733		-1.1774		-1.22722		-1.1889		-0.909228	-1.22543	-1.35281	-1.00199	-1.23899	-1.21545	-1.14028	-1.23752
Q2FY68_C81	Q2FY68	DNUFISIMAGIPIDYIK	proC	Pyrroline-5-carboxylate reductase	no		no	-1.65612		-0.796605		-1.18802		-1.08112		-1.50761	-1.80462	-0.879595	-0.713616	-1.16395	-1.2121	-0.979658	-1.18259
Q2G2Q3_C49	Q2G2Q3	IGHTGTLDPEVAGVLPVUIGNATR	truB	tRNA pseudouridine synthase B	no		no	-0.887005		-1.3796		-1.23297		-1.23264		-0.691935	-1.08208	-1.52436	-1.23485	-1.35034	-1.11559	-1.19867	-1.26661
Q2G297_C53	Q2G297	VELAGVLHDFUKYDDLGK	SAOUHSC_01696	Uncharacterized protein	no		no	-2.17887		-0.646594		-1.07184		-0.839169		-2.0563	-2.30144	-0.605574	-0.687614	-1.14774	-0.995931	-0.739493	-0.938846
Q2FYY6_C170	Q2FYY6	GEPTLELNDDGGYFDLAPTDLGENUR	SAOUHSC_01287	Glutamine synthetase	yes		no	-1.31972		-1.60874		-1.0367		-0.776614		-1.2099	-1.42954	-1.89764	-1.31983	-1.01324	-1.06017	-0.770658	-0.782571
Q2G0B7_C8	Q2G0B7	IAVYUGASK	SAOUHSC_00688	Cytokinin riboside 5'-monophosphate phosphoribohydrolase	no		no	-1.13209		-1.43058		-1.07323		-1.12988		-0.98185	-1.28233	-1.55733	-1.30383	-1.12149	-1.02497	-1.07969	-1.18007
Q2G235_C217	Q2G235	NUVFLVDTFHTLK	SAOUHSC_02133	Nicotinate phosphoribosyltransferase	yes		no	-1.88137		-1.10643		-1.78563				-1.75854	-2.00421	-1.14576	-1.06709	-1.79431	-1.77695
Q2G065_C307	Q2G065	IAELUHK	SAOUHSC_00756	Uncharacterized protein	no		no	-1.09577		-1.27004		-1.12722		-1.28262		-0.956135	-1.23541	-1.36119	-1.17889	-1.17069	-1.08375	-1.32446	-1.24079
Q2G1E5_C311	Q2G1E5	NFVNAULGIEEIVVKPEEAR	SAOUHSC_00180	Uncharacterized protein	no		no	-1.45794		-1.35588		-0.926582		-1.03622		-1.21846	-1.69741	-1.63792	-1.07385	-0.964517	-0.888648	-0.918579	-1.15386
Q2G2A4_C346	Q2G2A4	GATUTISNIGSAGGQWFTPVINHPEVAILGIGR	SAOUHSC_01042	Dihydrolipoamide acetyltransferase component of pyruvate dehydrogenase complex	no		no	-1.72211		-1.08669		-0.891356		-1.07682		-1.52388	-1.92035	-1.42938	-0.744004	-0.915854	-0.866857	-0.995851	-1.15779
Q2G1Y5_C71	Q2G1Y5	AGEYEDUKDADLVVITAGAPQKPGETR	ldh2	L-lactate dehydrogenase 2	no	Functional site	no	-1.62566		-1.38574		-0.999871		-0.838272		-1.48068	-1.77063	-1.60371	-1.16777	-0.87546	-1.12428	-0.83439	-0.842154
Q2G0L0_C72	Q2G0L0	ERELEEAUK	SAOUHSC_00550	Uncharacterized protein	no		no	-1.05289		-1.52407		-1.25005		-1.03232		-1.14274	-0.963054	-1.66983	-1.37831	-1.15069	-1.34942	-1.00271	-1.06193
Q2FXM5_C44	Q2FXM5	EELSLAYSPGVAEPUKDIYEDK	SAOUHSC_01810	NADP-dependent malic enzyme, putative	no		no	-1.52802		-1.35153		-1.12161		-0.875326		-1.26948	-1.78657	-1.47907	-1.22398	-1.04374	-1.19949	-0.897463	-0.853188
Q2G218_C72	Q2G218	VKAGEYSDUHDADLVVICAGAAQKPGETR	ldh1	L-lactate dehydrogenase 1	no	Functional site	no			-2.05034		-1.38187		-1.45745				-2.22183	-1.87885	-1.65531	-1.10843	-1.39081	-1.52409
Q2FXM5_C362	Q2FXM5	AAVEAIADLIDSSELNEDYUIPGPFDK	SAOUHSC_01810	NADP-dependent malic enzyme, putative	no		no	-1.6616		-1.33422		-0.957244		-0.952729		-1.52176	-1.80143	-1.49264	-1.17579	-1.04213	-0.872359	-1.02437	-0.881091
Q2G065_C318	Q2G065	VAIAIUATAEK	SAOUHSC_00756	Uncharacterized protein	no		no	-0.912506		-1.51402		-1.13271		-1.34926		-0.995937	-0.829075	-1.79997	-1.22806	-1.1291	-1.13632	-1.38206	-1.31646
Q2FZD8_C385	Q2FZD8	AUYLLQTYANGK	pheT	Phenylalanine--tRNA ligase beta subunit	yes		no	-1.36936		-1.67429		-1.14209		-0.745593		-1.28754	-1.45119	-1.52317	-1.82541	-1.18131	-1.10287	-0.629947	-0.861238
Q2G2S0_C199	Q2G2S0	MSGAVGTFANIPPEIESYVUK	purB	Adenylosuccinate lyase	no		no	-0.742969		-1.56762		-1.26208		-1.3588		-0.373776	-1.11216	-1.6122	-1.52305	-1.16634	-1.35783	-1.07406	-1.64354
Q2FX95_C210	Q2FX95	EAVUQLEIK	SAOUHSC_01982	Ribosomal large subunit pseudouridine synthase, RluD subfamily, putative	no		no	-1.31863		-1.45766		-1.00604		-1.16948		-1.29625	-1.34102	-1.65334	-1.26198	-1.03925	-0.972819	-0.875528	-1.46344
Q2FZM7_C207	Q2FZM7	NNLALUVYYLEK	SAOUHSC_00973	Uncharacterized protein	no		no	-1.40968		-1.78051		-0.973868		-0.805353		-1.34788	-1.47149	-2.35964	-1.20138	-1.05062	-0.897113	-0.722325	-0.888381
Q2FW27_C150	Q2FW27	VEGIUDIDGGK	adk	Adenylate kinase	yes	Functional site	no	-2.07826		-1.00741		-1.30451		-0.589205		-1.87525	-2.28127	-1.20145	-0.813372	-1.28511	-1.32391	-0.280597	-0.897812
Q2FYK5_C216	Q2FYK5	LSUQLYQR	thyA	Thymidylate synthase	yes	Functional site	no	-1.50452		-1.39012		-1.03291		-1.05291		-1.27932	-1.72972	-1.5569	-1.22334	-1.07279	-0.993034	-0.924673	-1.18115
Q2G220_C174	Q2G220	SUDIESVESWK	SAOUHSC_02980	Uncharacterized protein	no		no	-1.67477		-0.586187		-1.31517		-1.4189		-1.57046	-1.77908	-0.717691	-0.454684	-1.21699	-1.41335	-1.47935	-1.35845
Q2G059_C95	Q2G059	LDVHNAUVVVTR	SAOUHSC_00763	Uncharacterized protein	no		no	-1.00763		-1.17027		-1.41158		-1.42884		-0.857547	-1.15772	-1.31067	-1.02988	-1.39006	-1.43309	-1.32064	-1.53704
Q2G297_C180	Q2G297	TIDULNYYNYSDER	SAOUHSC_01696	Uncharacterized protein	no		no	-2.00915		-1.01019		-1.07939		-0.920197		-1.74202	-2.27628	-1.0851	-0.935283	-1.10442	-1.05436	-0.832437	-1.00796
Q2FV66_C32	Q2FV66	AKDIUFELNHTRPSATNK	SAOUHSC_02871	Uncharacterized protein	no		no	-2.42102		-1.57598		-0.512656		-0.526557		-2.2837	-2.55835	-1.73692	-1.41504	-0.416134	-0.609178	-0.557115	-0.496
Q2FY66_C430	Q2FY66	MNTVDAYENLLFDULK	zwf	Glucose-6-phosphate 1-dehydrogenase	yes		no	-1.92949		-1.39414		-0.849738		-0.86782		-1.83099	-2.028	-1.57531	-1.21297	-0.928841	-0.770634	-0.733387	-1.00225
Q2FZP6_C53	Q2FZP6	FUQNVADQGCK	murE	UDP-N-acetylmuramoyl-L-alanyl-D-glutamate--L-lysine ligase	yes		no	-1.11809		-1.21154		-1.3271		-1.39007		-0.992336	-1.24384	-1.6919	-0.731182	-1.73346	-0.920735	-1.27474	-1.50541
Q2G2T8_C139	Q2G2T8	AIGVUNFNVHHLEK	SAOUHSC_00712	Uncharacterized protein	no		no	-1.09631		-0.896671		-1.45756		-1.60216		-0.938404	-1.25422	-0.998183	-0.795158	-1.47674	-1.43839	-1.51573	-1.68859
Q2FXT5_C119	Q2FXT5	IIAEUIK	queA	S-adenosylmethionine:tRNA ribosyltransferase-isomerase	no		no	-1.9313		-1.40759		-0.839532		-0.892438		-1.75177	-2.11083	-1.62428	-1.19089	-0.888293	-0.790771	-0.749208	-1.03567
Q2G2T1_C174	Q2G2T1	SIUDIYPLLNK	SAOUHSC_01973	Uncharacterized protein	no		no	-1.96993		-1.73334		-1.02375		-0.363947		-1.90239	-2.03747	-2.39244	-1.07424	-0.948503	-1.099	-0.431384	-0.296509
Q2FYU6_C12	Q2FYU6	VNVTLACTEUGDR	rpmG1	50S ribosomal protein L33 1	no		no	-1.03143		-1.44689		-1.12174		-1.49452		-1.00512	-1.05774	-1.5137	-1.38008	-1.1468	-1.09668	-1.40678	-1.58225
Q2FYF3_C118	Q2FYF3	FTITTTKDVYEUR	SAOUHSC_01499	Uncharacterized protein	no		no	-1.7719		-1.20236		-1.20367		-0.921663		-2.04734	-1.49647	-1.53965	-0.865069	-1.0508	-1.35653	-0.896576	-0.94675
Q2G101_C25	Q2G101	SYFUGQLDVPLTDTGTK	SAOUHSC_00359	Phosphoglycerate mutase family protein	no		no	-0.582192		-0.365509		-1.47378		-2.68051		-0.517978	-0.646406	-0.634935	-0.0960825	-1.37221	-1.57536	-2.77636	-2.58467
Q2FZU6_C216	Q2FZU6	ELUDEHNVLFIADEIQAGLGR	rocD	Ornithine aminotransferase	no		no	-2.02972		-1.59968		-0.787769		-0.756192		-1.85532	-2.20411	-1.85626	-1.34311	-0.835232	-0.740306	-0.679367	-0.833016
Q2FVE0_C46	Q2FVE0	INGUHYCVDIHK	SAOUHSC_02774	Alkyl hydroperoxide reductase AhpD	no		no	-2.6432		-1.81429		-0.726124				-3.25801	-2.02838	-1.81934	-1.80925	-1.32207	-0.130176
Q2G0N1_C596	Q2G0N1	KUDPVILEPMMK	fusA	Elongation factor G	yes		no	-1.82616		-1.1681		-1.094		-1.09976		-1.63209	-2.02022	-1.32713	-1.00906	-1.35424	-0.833747	-1.1251	-1.07443
Q2G0Q9_C238	Q2G0Q9	MPVQFEUNCSHEK	hslO	33 kDa chaperonin	no		no	-1.83528		-1.20665				-2.18369		-1.79436	-1.8762	-1.0999	-1.31341			-2.50881	-1.85857
Q2FXK7_C78	Q2FXK7	GVUGTAVSER	SAOUHSC_01828	GAF domain protein	no		no	-0.624195		-1.05274		-1.65981		-1.8984		-0.50083	-0.74756	-1.19687	-0.908605	-1.65813	-1.6615	-1.89797	-1.89883
Q2G157_C199	Q2G157	VMDLGVHUSVVGGAITRPK	nanE	Putative N-acetylmannosamine-6-phosphate 2-epimerase	no		no	-1.52087		-0.569532		-1.33338		-1.84468		-1.4101	-1.63164	-0.781554	-0.357511	-1.3555	-1.31126	-1.66809	-2.02128
Q2G0J1_C143	Q2G0J1	LYPELPHSDYIUFYPMNK	SAOUHSC_00573	Putative heme-dependent peroxidase SAOUHSC_00573	no		no	-1.77728		-2.08526		-1.41047				-1.61699	-1.93757	-2.4267	-1.74381	-1.29382	-1.52712
Q2G0J0_C310	Q2G0J0	GUSIEDVYNLSIITAAQALQ	SAOUHSC_00574	Phosphate acetyltransferase	yes		no	-1.64134		-1.48527		-1.24928		-0.953062		-1.37722	-1.90547	-1.67286	-1.29768	-1.24182	-1.25673	-0.866042	-1.04008
Q2FWX8_C61	Q2FWX8	EGEQUGVASLK	SAOUHSC_02143	Uncharacterized protein SAOUHSC_02143	no		no	-2.18051		-1.10414		-0.956177		-1.10249		-2.00429	-2.35672	-1.19158	-1.01671	-0.968668	-0.943685	-0.995551	-1.20943
Q2FZW6_C73	Q2FZW6	AGUGYVPVDTSIPEDR	dltA	D-alanine--D-alanyl carrier protein ligase	yes		no	-2.13326		-1.19085		-1.08591		-0.935794		-1.96145	-2.30508	-1.34432	-1.03738	-1.15402	-1.0178	-0.978634	-0.892955
Q2FZ37_C193	Q2FZ37	DUSIVEINPLVTTADGDVLALDAK	sucC	Succinate--CoA ligase [ADP-forming] subunit beta	yes		no	-1.30886		-1.29827		-1.51392		-1.24202		-1.20009	-1.41764	-1.25177	-1.34477	-1.58602	-1.44181	-1.14552	-1.33853
Q2G2S7_C7	Q2G2S7	FIHUSDLHLDSPFK	SAOUHSC_01975	Uncharacterized protein	no		no	-1.62686		-2.03306		-1.70878				-1.56959	-1.68412	-2.01491	-2.05122	-1.59322	-1.82434
Q2FXE8_C179	Q2FXE8	LLWASUR	SAOUHSC_01901	Transaldolase	no		no	-1.24383		-1.10004		-1.43422		-1.60858		-1.1107	-1.37696	-1.27865	-0.921417	-1.47847	-1.38998	-1.5881	-1.62905
Q2G0K8_C18	Q2G0K8	QASFYVAUELYK	nagB	Glucosamine-6-phosphate deaminase	no		no	-0.467615		-1.31372		-1.68763		-1.96285		-0.31479	-0.620441	-1.43907	-1.18837	-1.60027	-1.77498	-1.92192	-2.00378
Q2G0X6_C204	Q2G0X6	HVYDPTUGSGSLLLR	SAOUHSC_00397	Type I restriction-modification system, M subunit	no		no	-2.04373		-1.52559		-0.917803		-0.954494		-1.85747	-2.22999	-1.71809	-1.33308	-0.968407	-0.867199	-0.86549	-1.0435
O34090_C95	O34090	DVPSVIPEGLTLGUIPDR	hemC	Porphobilinogen deaminase	no		no	-2.24935		-0.903877		-0.998934		-1.31017		-1.97075	-2.52794	-1.11625	-0.691499	-1.14342	-0.854444	-1.34107	-1.27927
Q2FZ92_C221	Q2FZ92	NQTEEDYLIUNYHQR	murD	UDP-N-acetylmuramoylalanine--D-glutamate ligase	yes		no	-1.79381		-1.43661		-1.18775		-1.05646		-1.61193	-1.97568	-1.57781	-1.29541	-1.23514	-1.14035	-0.980569	-1.13236
Q2FXU1_C627	Q2FXU1	TDUPNIK	SAOUHSC_01742	GTP pyrophosphokinase	yes		no	-1.3279		-0.644306		-1.2713		-2.2427		-1.25099	-1.4048	-0.870994	-0.417617	-1.22834	-1.31425	-2.1465	-2.33891
Q2G0X6_C370	Q2G0X6	NYLEAVIGLPANIFYGTSIPTUILVFK	SAOUHSC_00397	Type I restriction-modification system, M subunit	no		no	-2.1957		-1.52265		-0.976367		-0.84735		-2.0059	-2.38551	-1.72937	-1.31593	-1.03235	-0.920385	-0.850995	-0.843706
Q2FZI5_C137	Q2FZI5	DALTYIENUELPVVVK	purD	Phosphoribosylamine--glycine ligase	no		no	-1.17194		-1.38573		-1.52953		-1.5055		-1.04002	-1.30386	-0.858962	-1.91249	-1.59009	-1.46897	-1.41957	-1.59144
Q2G2Q3_C165	Q2G2Q3	ISELDFKENEUHFK	truB	tRNA pseudouridine synthase B	no		no	-1.37624		-1.64204		-1.33376		-1.24548		-1.3481	-1.40438	-1.83408	-1.45001	-1.4155	-1.25202	-1.10889	-1.38206
Q2G0Q9_C240	Q2G0Q9	MPVQFECNUSHEK	hslO	33 kDa chaperonin	no		no	-2.65095		-0.64561		-2.30849				-2.46817	-2.83372	-0.717216	-0.574004	-2.71492	-1.90207
Q2FW29_C27	Q2FW29	VMVIUENPK	rpmJ	50S ribosomal protein L36	yes		no	0.136242		-0.497518		-2.15008		-3.10047		0.363261	-0.0907773	-0.645076	-0.349959	-2.13385	-2.1663	-3.00143	-3.19952
Q2FWX5_C183	Q2FWX5	LILENUR	SAOUHSC_02146	Uncharacterized protein	no		no	-1.95433		-1.51283		-1.27937		-0.867763		-1.81238	-2.09628	-1.59601	-1.42965	-1.2426	-1.31613	-0.779571	-0.955956
Q2G0N1_C258	Q2G0N1	QATTNVEFYPVLUGTAFK	fusA	Elongation factor G	yes		no	-1.64597		-1.60485		-1.17494		-1.20004		-1.36721	-1.92473	-1.77374	-1.43596	-1.27456	-1.07531	-1.07808	-1.322
Q2G0J0_C167	Q2G0J0	GDEQYIFGDUAINPELDSQGLAEIAVESAK	SAOUHSC_00574	Phosphate acetyltransferase	yes		no	-1.66386		-2.14505		-0.986202		-0.84223		-0.704982	-2.62273	-2.39813	-1.89196	-0.968012	-1.00439	-0.943666	-0.740794
Q2FUY3_C201	Q2FUY3	LLIMUGK	SAOUHSC_02962	Tributyrin esterase, putative	no		no	-1.9659		-1.23974		-1.30687		-1.12911		-1.77286	-2.15894	-1.40556	-1.07392	-1.21732	-1.39642	-1.08317	-1.17504
Q2FWY1_C158	Q2FWY1	SPTUTQQDVK	ppaC	Probable manganese-dependent inorganic pyrophosphatase	yes		no	-1.62778		-1.23094		-1.32786		-1.45949		-1.37707	-1.87848	-1.31545	-1.14644	-1.34982	-1.3059	-1.40943	-1.50955
Q2G1C8_C202	Q2G1C8	ETGKPHUFVVRPEQDGVDIEVIDNK	SAOUHSC_00197	Uncharacterized protein	no		no	-1.33067		-0.87818		-1.65076		-1.82109		-1.18272	-1.47863	-1.00251	-0.753847	-1.676	-1.62553	-1.76641	-1.87578
Q2G2P2_C86	Q2G2P2	HUALQVYAEHYPIVGK	SAOUHSC_00204	Globin domain protein	no		no	-1.42687		-1.80008		-1.16089		-1.29722		-1.26181	-1.59192	-2.0248	-1.57536	-1.24866	-1.07312	-1.11085	-1.48358
O05204_C338	O05204	GVAFCPHUDGPLFENK	ahpF	Alkyl hydroperoxide reductase subunit F	no		no	-1.30502		-1.13446		-1.58785		-1.66923		-1.22779	-1.38225	-1.18177	-1.08715	-1.639	-1.53671	-1.57269	-1.76577
Q2G1C6_C394	Q2G1C6	LNGUGGFIDITQSVNK	SAOUHSC_00199	Uncharacterized protein	no		no			-1.24715		-2.47761		-1.9961				-1.24872	-1.24557	-2.22028	-2.73495	-1.82174	-2.17046
Q2FUS8_C102	Q2FUS8	LFVUYLGDFK	drp35	Lactonase drp35	no		no	-1.81573		-1.61517		-1.14928		-1.15838		-1.70859	-1.92287	-1.43823	-1.79211	-1.1359	-1.16265	-1.14168	-1.17508
Q2G1C6_C201	Q2G1C6	GTYADQQGNIYLTQEAYLSEUYHVALNAK	SAOUHSC_00199	Uncharacterized protein	no		no	-1.15497		-1.19637		-2.17933		-1.21395		-0.986931	-1.32301	-1.27746	-1.11528	-2.32013	-2.03854	-1.188	-1.23991
Q2G0N1_C390	Q2G0N1	DTGTGDTLUGEK	fusA	Elongation factor G	yes		no	-1.62563		-1.77649		-1.18443		-1.16479		-1.35264	-1.89862	-1.78647	-1.7665	-1.24424	-1.12463	-1.11301	-1.21657
Q2FZ71_C155	Q2FZ71	LANAAGLDGVVUSPLESR	pyrF	Orotidine 5'-phosphate decarboxylase	no		no	-2.25308		-1.41609		-1.04587		-1.12929		-1.79766	-2.70849	-1.52728	-1.3049	-1.08862	-1.00312	-1.12205	-1.13654
Q2FY60_C168	Q2FY60	DGASUVTYIGPNGAGHYVK	SAOUHSC_01605	6-phosphogluconate dehydrogenase, decarboxylating	yes		no	-0.852199		-1.85036		-1.62241		-1.52901		-0.689795	-1.0146	-1.94746	-1.75326	-1.65496	-1.58986	-1.42183	-1.63619
Q2FWY1_C118	Q2FWY1	AEPVGUTATILYK	ppaC	Probable manganese-dependent inorganic pyrophosphatase	yes		no	-2.02967		-1.20859		-1.19965		-1.45619		-2.07286	-1.98647	-1.36197	-1.0552	-1.20068	-1.19863	-1.45162	-1.46077
Q2G0M8_C142	Q2G0M8	NDAILSDELNHASIIDGUR	SAOUHSC_00532	Uncharacterized protein	no		no	-1.99065		-1.91473		-1.15052		-0.843724		-1.98891	-1.9924	-2.2464	-1.58307	-1.1937	-1.10734	-0.732836	-0.954613
Q2FXM5_C214	Q2FXM5	NMVMUDSR	SAOUHSC_01810	NADP-dependent malic enzyme, putative	no		no	-2.61425		-1.96075		-0.522122		-0.807674		-2.4092	-2.81929	-2.15117	-1.77034	-0.930958	-0.113286	-1.3818	-0.233549
Q2G2A3_C52	Q2G2A3	GNLGGVCLNVGUIPSK	SAOUHSC_01043	Dihydrolipoyl dehydrogenase	no		no	-2.92534		-2.50816		-0.578705				-2.81492	-3.03576	-2.4456	-2.57072	-0.683298	-0.474112
Q2FVB2_C367	Q2FVB2	DTUFQTVNR	fbp	Fructose-1,6-bisphosphatase class 3	no		no	-3.01894		-1.39619		-0.75485		-0.892156		-2.77448	-3.2634	-1.72628	-1.0661	-0.758599	-0.751101	-0.909011	-0.875301
Q2FY66_C10	Q2FY66	HIPULITIFGATGDLSHR	zwf	Glucose-6-phosphate 1-dehydrogenase	yes		no	-2.24746		-1.45815		-1.2896		-1.12171		-2.09491	-2.40001	-1.61255	-1.30376	-1.2893	-1.2899	-1.07685	-1.16657
Q2FY32_C53	Q2FY32	LTIPEIFUK	aroK	Shikimate kinase	no		no	-1.19064		-2.23613		-1.80303		-0.904307		-0.672037	-1.70925	-2.32959	-2.14267	-1.85303	-1.75302	-0.7456	-1.06301
P47768_C514	P47768	MUPIETPEGPNIGLINSLSSYAR	rpoB	DNA-directed RNA polymerase subunit beta	yes		no	-2.0656		-1.8209		-1.26523		-1.19963		-1.88774	-2.24345	-2.1156	-1.5262	-1.36279	-1.16767	-1.14704	-1.25223
Q2FWX8_C89	Q2FWX8	AGTGUYVSISEDKR	SAOUHSC_02143	Uncharacterized protein SAOUHSC_02143	no		no	-2.70576		-1.61762		-0.981219		-1.09039		-2.34359	-3.06794	-1.06211	-2.17312	-0.280808	-1.68163	-0.305681	-1.87509
Q2FUZ8_C211	Q2FUZ8	RVDUDIDYEEDAEK	SAOUHSC_02947	Sulfite reductase [NADPH] flavoprotein alpha-component	no		no	-1.97634		-0.622105		-1.75078		-2.08498		-1.8647	-2.08798	-0.768494	-0.475716	-1.81441	-1.68715	-2.01853	-2.15143
Q2G101_C187	Q2G101	VENUKPYIIE	SAOUHSC_00359	Phosphoglycerate mutase family protein	no		no	-0.763143		-0.725183		-2.14813		-2.86665		-0.60279	-0.923495	-0.801632	-0.648734	-2.11462	-2.18163	-2.587	-3.14629
Q2G030_C128	Q2G030	HGMTPIIUVGETDEERESGK	tpiA	Triosephosphate isomerase	yes		no	-3.0611		-2.20558		-1.2613				-2.63228	-3.48993	-2.61865	-1.79251	-1.54279	-0.9798
Q2FZH5_C557	Q2FZH5	AVDUATQEEVIELVNNYVK	SAOUHSC_01029	Phosphoenolpyruvate-protein phosphotransferase	no		no	-1.95792		-1.63673		-1.53613		-1.40341		-1.77527	-2.14057	-1.68817	-1.58528	-1.46192	-1.61035	-1.32485	-1.48197
Q2FZ48_C311	Q2FZ48	AVPDAPHEALLULDATTGQNALSQAR	ftsY	Signal recognition particle receptor FtsY	yes		no	-1.92338		-2.22722		-1.30254		-1.09929		-1.85032	-1.99643	-2.40997	-2.04448	-1.19562	-1.40947	-1.0303	-1.16828
Q2FZ82_C323	Q2FZ82	ESLVINGDHVTTDAGTGUVHTAPGHGEDDYIVGQK	ileS	Isoleucine--tRNA ligase	yes		no	-2.79108		-2.65941				-1.11212		-2.50865	-3.07351	-2.70821	-2.61061			-1.0113	-1.21294
Q2FWC4_C270	Q2FWC4	GAAIQTGUDYEFGR	SAOUHSC_02374	Aminobenzoyl-glutamate utilization protein B, putative	no		no	-2.60196		-1.9759		-0.966025		-1.05617		-2.34278	-2.86113	-2.39897	-1.55283	-1.18046	-0.751587	-0.945443	-1.16689
Q2FUZ8_C448	Q2FUZ8	GVUSVHFAER	SAOUHSC_02947	Sulfite reductase [NADPH] flavoprotein alpha-component	no	Functional site	no	-2.85523		-1.50751		-1.17497		-1.10747		-2.63417	-3.0763	-1.61329	-1.40173	-0.951931	-1.39802	-1.01154	-1.20339
Q2FV76_C231	Q2FV76	SLADFASLUFHVPFTK	SAOUHSC_02860	HMG-CoA synthase, putative	yes		no	-1.51313		-1.90922		-1.73979		-1.50709		-1.39779	-1.62847	-2.19456	-1.62389	-1.82337	-1.65622	-1.3965	-1.61768
Q2FXH9_C83	Q2FXH9	GNDVLGILUHVDVVPAGDGWDSNPFEPVVTEDAIIAR	SAOUHSC_01868	Putative dipeptidase SAOUHSC_01868	no	Functional site	no	-2.93987		-1.79603		-1.17898		-0.901018		-2.77962	-3.10011	-1.60876	-1.9833	-1.12989	-1.22806	-0.934152	-0.867884
Q2FVB2_C248	Q2FVB2	VULANLLR	fbp	Fructose-1,6-bisphosphatase class 3	no		no	-3.06042		-1.89496		-0.869182		-1.05828		-2.88406	-3.23678	-2.20277	-1.58714	-0.768912	-0.969452	-1.10967	-1.00688
Q2G0R1_C37	Q2G0R1	PLVUVGILK	SAOUHSC_00485	Hypoxanthine phosphoribosyltransferase	no		no	-0.896174		-1.05905		-2.37588		-2.5973		-0.74882	-1.04353	-1.09966	-1.01844	-2.2144	-2.53736	-2.5698	-2.62481
Q2G2C1_C675	Q2G2C1	ISEGTIUYTGDILNPER	SAOUHSC_01064	Pyruvate carboxylase	no		no	-2.53259		-2.46842		-1.31655		-0.689512		-2.37655	-2.68864	-2.77241	-2.16443	-0.894349	-1.73875	-0.548206	-0.830819
Q2FYN6_C281	Q2FYN6	LLFNVDUEVK	SAOUHSC_01399	Uncharacterized hydrolase SAOUHSC_01399	no		no	-2.36585		-1.90921		-1.5074		-1.26259		-2.21853	-2.51317	-2.0194	-1.79902	-1.57716	-1.43764	-1.19255	-1.33264
Q2FZ48_C274	Q2FZ48	GVDILIUDTAGR	ftsY	Signal recognition particle receptor FtsY	yes	Functional site	no	-1.97121		-2.33697		-1.66196		-1.15633		-1.78558	-2.15684	-2.341	-2.33295	-1.6403	-1.68362	-1.04817	-1.26448
Q2FZ36_C124	Q2FZ36	LVGPNUPGVITADECK	sucD	Succinate--CoA ligase [ADP-forming] subunit alpha	no		no	-2.17698		-1.5078		-1.93892		-1.53345		-2.1146	-2.23936	-1.64417	-1.37142	-2.02204	-1.8558	-1.45312	-1.61379
Q2FV61_C93	Q2FV61	QYNVTLDKEDEVUILYGTK	SAOUHSC_02876	Aminotransferase	no		no	-2.54376		-2.00303		-1.41964		-1.1998		-2.50275	-2.58476	-2.23399	-1.77206	-1.84581	-0.993465	-1.10815	-1.29145
Q2FV69_C37	Q2FV69	ALSSSLLQLLEQQLFQTITVNQIUDNALVHR	SAOUHSC_02867	Uncharacterized protein	no	Functional site	no	-2.06025		-2.25733		-1.72152		-1.19917		-1.95772	-2.16278	-2.4238	-2.09085	-1.75899	-1.68405	-1.00627	-1.39206
Q2FWE5_C238	Q2FWE5	GGMILUK	glyA	Serine hydroxymethyltransferase	no		no	-2.20985		-2.07054		-1.62923		-1.33213		-2.02088	-2.39881	-2.31304	-1.82804	-1.64097	-1.61749	-1.19149	-1.47277
Q2FZ36_C269	Q2FZ36	TLNSUGVK	sucD	Succinate--CoA ligase [ADP-forming] subunit alpha	no		no	-1.73432		-2.22053		-1.7731		-1.51883		-1.55891	-1.90974	-2.40456	-2.0365	-1.86254	-1.68366	-1.4222	-1.61546
Q2FXI6_C30	Q2FXI6	QGATVFEFTAGWCPDUR	SAOUHSC_01860	Uncharacterized protein	no		no					-3.32506		-4.01798						-3.24127	-3.40885	-3.80609	-4.22986
Q2FVE0_C49	Q2FVE0	INGCHYUVDIHKK	SAOUHSC_02774	Alkyl hydroperoxide reductase AhpD	no		no	-1.10223		-1.98148		-2.48401		-1.77894		-0.842051	-1.36242	-2.57966	-1.3833	-2.40064	-2.56738	-1.91132	-1.64656
Q2FXL9_C224	Q2FXL9	SNEYVLFDLGVIYEHYUSDMTR	SAOUHSC_01816	Uncharacterized peptidase SAOUHSC_01816	no	Functional site	no	-3.90869		-3.44437						-3.89218	-3.9252	-3.43904	-3.44969
Q2G1S3_C404	Q2G1S3	ISELUNVQISIFSVGPDR	purA	Adenylosuccinate synthetase	no		no	-1.96403		-1.37342		-1.93513		-2.09265		-1.81944	-2.10861	-1.26588	-1.48097	-1.87939	-1.99088	-1.95076	-2.23453
Q2G1S3_C343	Q2G1S3	IUTAYELDGK	purA	Adenylosuccinate synthetase	no		no	-2.1875		-1.35219		-1.99853		-2.0096		-2.09074	-2.28426	-1.50308	-1.20131	-1.95668	-2.04038	-1.63891	-2.3803
Q2FZD2_C32	Q2FZD2	VESGVQLVDFWATWCGPUK	trxA	Thioredoxin	yes		no	-0.755526		-2.00166		-2.61923		-2.27349		-0.737844	-0.773207	-2.18224	-1.82107	-2.56996	-2.6685	-2.02426	-2.52271
Q2FXL9_C149	Q2FXL9	AAELADKUIEIGVSYLK	SAOUHSC_01816	Uncharacterized peptidase SAOUHSC_01816	no		no	-2.67961		-3.08268		-1.13344		-0.791929		-2.51065	-2.84858	-3.06616	-3.09921	-0.861998	-1.40488	-0.862628	-0.72123
Q2FZ82_C124	Q2FZ82	EKUKEFALEQIELQK	ileS	Isoleucine--tRNA ligase	yes		no	-2.77874		-2.54194		-1.21102		-1.17864		-2.63391	-2.92356	-2.71371	-2.37017	-1.2168	-1.20524	-1.0961	-1.26119
Q2G0R1_C19	Q2G0R1	EVLLTEEDIQNIUK	SAOUHSC_00485	Hypoxanthine phosphoribosyltransferase	no		no	-0.82649		-1.33032		-2.76686		-2.80787		-0.759087	-0.893893	-1.44426	-1.21638	-2.66091	-2.87282	-2.65681	-2.95893
Q2FWE5_C339	Q2FWE5	EAEETLDSVGITUNK	glyA	Serine hydroxymethyltransferase	no		no	-2.55904		-2.44281		-1.44979		-1.29225		-2.36943	-2.74864	-2.50619	-2.37943	-1.63183	-1.26775	-1.32034	-1.26417
Q2FV40_C90	Q2FV40	AIELUQK	SAOUHSC_02899	Uncharacterized protein	no		no	-3.02925		-2.37921		-1.60919		-1.15904		-2.88545	-3.17306	-2.54498	-2.21344	-1.44469	-1.77369	-1.19235	-1.12573
Q2FZ36_C133	Q2FZ36	LVGPNCPGVITADEUK	sucD	Succinate--CoA ligase [ADP-forming] subunit alpha	no		no	-2.87113		-2.27702		-1.87674		-1.50958		-2.7471	-2.99516	-2.24339	-2.31065	-1.85324	-1.90023	-1.43682	-1.58234
Q2FXP9_C148	Q2FXP9	YADEUKDIATVEQKPK	infC	Translation initiation factor IF-3	yes		no	-1.93767		-2.67279		-2.21186		-1.72922		-1.81061	-2.06474	-2.83454	-2.51103	-2.20244	-2.22129	-1.57368	-1.88475
Q2G000_C32	Q2G000	FEAGWCPDUR	SAOUHSC_00834	Thioredoxin, putative	no		no	-0.588826		-1.76434		-2.82205		-3.49195		-0.521163	-0.65649	-2.037	-1.49167	-2.66905	-2.97506	-3.46083	-3.52307
Q2FZD9_C194	Q2FZD9	IIUPGKVYR	pheS	Phenylalanine--tRNA ligase alpha subunit	yes		no	-4.25467		-2.62626		-1.14484		-0.776609		-4.09809	-4.41126	-2.64386	-2.60867	-1.25491	-1.03478	-1.00836	-0.544856
Q2FXG2_C79	Q2FXG2	LASSGNYDAVITLGUVIR	ribH	6,7-dimethyl-8-ribityllumazine synthase	no		no	-2.9405		-3.3535		-1.496		-1.04406		-2.79721	-3.08379	-3.3095	-3.39749	-1.47271	-1.51929	-1.08161	-1.00651
Q2FZU6_C353	Q2FZU6	PYUEALKEEGLLCK	rocD	Ornithine aminotransferase	no		no	-3.22333		-3.12749		-1.85411		-0.979651		-3.17046	-3.27621	-3.39762	-2.85736	-1.87594	-1.83228	-1.0709	-0.8884
Q2G030_C189	Q2G030	SSTSEDANEMUAFVR	tpiA	Triosephosphate isomerase	yes		no	-3.0635		-2.51562		-2.04973		-1.76922		-2.69947	-3.42753	-2.93082	-2.10042	-2.23182	-1.86765	-1.92818	-1.61026
Q2FZ23_C240	Q2FZ23	YLQEIUAVDQDFVK	tsf	Elongation factor Ts	yes		no	-1.35577		-2.1046		-3.11032		-2.89347		-1.16768	-1.54385	-2.2046	-2.0046	-3.07551	-3.14513	-2.73625	-3.05069
P0A088_C114	P0A088	YUINSAAIQFIPYEK	msrB	Peptide methionine sulfoxide reductase MsrB	no	Functional site	no	-1.84884		-2.28548		-2.72486		-2.89093		-1.68844	-2.00925	-2.43642	-2.13453	-2.71479	-2.73492	-2.59299	-3.18887
Q2FWB9_C58	Q2FWB9	LADSEVLVUTVIGFPLGASTTATK	deoC	Deoxyribose-phosphate aldolase	no		no	-2.1266		-2.30191		-2.92704		-3.04176		-2.06154	-2.19166	-2.1702	-2.43362	-2.50079	-3.3533	-3.17085	-2.91267
Q2G2A3_C47	Q2G2A3	GNLGGVULNVGCIPSK	SAOUHSC_01043	Dihydrolipoyl dehydrogenase	no		no	-3.55278		-4.0735		-2.45652		-1.11095		-3.4638	-3.64175	-4.1875	-3.95951	-2.5089	-2.40415	-1.0866	-1.1353
Q2FXL9_C56	Q2FXL9	QVLFUPK	SAOUHSC_01816	Uncharacterized peptidase SAOUHSC_01816	no		no	-4.57606		-3.98012		-1.72499		-1.1127		-4.34261	-4.8095	-4.35393	-3.60632	-1.69764	-1.75234	-0.99778	-1.22762
Q2FY60_C330	Q2FY60	IUSYAQGFAQMR	SAOUHSC_01605	6-phosphogluconate dehydrogenase, decarboxylating	yes		no	-4.17261		-3.63054		-2.42506		-1.98842		-4.02597	-4.31925	-3.89991	-3.36116	-2.23943	-2.6107	-1.84197	-2.13486

## Sheet: Complete data
Identifier	Leading razor protein	Sequence	Gene name	Name	Essential?	Functional site	Liganded Cysteine?	Median log2(R) 100 µM 1		Median log2(R) 50 µM 1		Median log2(R) 20 µM 1		Median log2(R) 10 µM 1		log2(R) 100 µM 1 replicate 1	log2(R) 100 µM 1 replicate 2	log2(R) 50 µM 1 replicate 1	log2(R) 50 µM 1 replicate 2	log2(R) 20 µM 1 replicate 1	log2(R) 20 µM 1 replicate 2	log2(R) 10 µM 1 replicate 1	log2(R) 10 µM 1 replicate 2
Q2FVA6_C75	Q2FVA6	IIASUSFAK	SAOUHSC_02827	Uncharacterized protein	no		yes	4.39998	+	5.15095	+	6.02262	+	6.06993	+	4.67463	4.12532	4.90776	5.39414	5.96324	6.082	6.15127	5.98859
Q2G032_C151	Q2G032	TIVFNTNHQELDGSETVVSGASUTTNSLAPVAK	SAOUHSC_00795	Glyceraldehyde-3-phosphate dehydrogenase	yes	Functional site	yes	2.35415	+	3.53562	+	3.17951	+	2.72929	+	2.46435	2.24394	3.42358	3.64766	3.20641	3.15261	2.52732	2.93127
Q2G0Y7_C307	Q2G0Y7	VGIGPGSIUTTR	guaB	Inosine-5'-monophosphate dehydrogenase	no	Functional site	yes	5.04118	+	3.27919	+	2.6098	+	1.71213		5.2061	4.87627	3.2154	3.34298	2.58729	2.63231	1.65251	1.77176
Q2G1G7_C269	Q2G1G7	QIUPHSIQPQFTTQR	SAOUHSC_00156	Uncharacterized protein	no		yes	5.02669	+	3.99099	+	2.20736	+	1.12422		5.12383	4.92955	3.85459	4.12739	2.2681	2.14662	1.14633	1.10212
Q2FWE4_C69	Q2FWE4	ETGVTFAFQGUEHINR	SAOUHSC_02355	UPF0340 protein SAOUHSC_02355	no		yes	5.2673	+	2.63405	+	2.68437	+	1.65288		5.38733	5.14727	2.54678	2.72131	2.63953	2.7292	1.63659	1.66916
Q2G1W0_C168	Q2G1W0	SULNDCYDK	SAOUHSC_02574	Uncharacterized protein	no		yes	4.63473	+	3.90032	+	2.37425	+	1.28585		4.71344	4.55602	3.77661	4.02403	2.43691	2.31159	1.28729	1.2844
Q2FY73_C143	Q2FY73	LTFHGVCETUQAK	SAOUHSC_01592	Transcriptional regulator, Fur, putative	yes		yes	3.24061	+	3.63345	+	3.33586	+	1.89688		3.43563	3.0456	3.55397	3.71293	3.31037	3.36135	1.92638	1.86738
Q2FY47_C46	Q2FY47	LSAAUDTTLK	xseB	Exodeoxyribonuclease 7 small subunit	no		yes	4.3871	+	3.62197	+	2.75777	+	1.18522		4.60372	4.17049	3.46362	3.78031	2.68507	2.83048	1.22293	1.1475
Q2G111_C16	Q2G111	VUYFTANGITHIDYK	rpsR	30S ribosomal protein S18	yes		yes	4.38663	+	3.73977	+	2.4283	+	0.951838		4.59532	4.17794	3.78604	3.6935	2.58122	2.27537	0.905043	0.998634
Q2FWA0_C2	Q2FWA0	UGIVGYIGYDNAK	glmS	Glutamine--fructose-6-phosphate aminotransferase [isomerizing]	yes	Functional site	yes	4.09285	+	3.33116	+	2.95669	+	0.920914		4.24656	3.93913	3.11105	3.55127	2.98435	2.92903	0.89817	0.943659
Q2FV75_C130	Q2FV75	MSAQAVGGAVGSNPLSIIVPUHR	SAOUHSC_02861	Methylated-DNA--protein-cysteine methyltransferase	no	Functional site	yes	4.52651	+	4.33736	+	2.03296	+	-0.057328		4.66118	4.39184	4.2149	4.45983	2.04953	2.01639	-0.0357419	-0.0789141
Q2G066_C30	Q2G066	HSETUPISANAYDQFNK	SAOUHSC_00755	Uncharacterized protein	no		yes	1.95426		2.0713	+	2.63454	+	2.30284	+	2.11567	1.79286	1.98637	2.15623	2.60623	2.66284	2.45223	2.15345
Q2G1H4_C147	Q2G1H4	LISNPGUFPTATLLALHPLISEK	argC	N-acetyl-gamma-glutamyl-phosphate reductase	no	Functional site	yes	2.00948	+	1.90571		2.02801	+	2.7294	+	2.0826	1.93636	1.9214	1.89002	2.10715	1.94886	2.87525	2.58354
Q2FY43_C49	Q2FY43	DLGIQTVAIYSEGDKDALHTQIADEAYUVGPTLSK	SAOUHSC_01623	Acetyl-CoA carboxylase, biotin carboxylase	yes		yes	3.38041	+	2.61434	+	2.15699	+	0.291148		3.42425	3.33657	2.64642	2.58227	2.14897	2.16501	0.354678	0.227618
O52582_C43	O52582	DMSFANUALPYVIGEVVEDR	cdr	Coenzyme A disulfide reductase	no	Functional site	yes	5.34264	+			3.08834	+	2.94847		5.39486	5.29042			3.15232	3.02436	3.59521	2.30173
Q2FZS0_C112	Q2FZS0	VASMDQLAAUSGFMYSMITAK	fabH	3-oxoacyl-[acyl-carrier-protein] synthase 3	yes	Functional site	yes	5.43631	+	5.0986	+					5.37778	5.49483	5.01578	5.18142
Q2FZV6_C284	Q2FZV6	FDMUGAANVVGIIEAASR	SAOUHSC_00879	Probable cytosol aminopeptidase	no		yes	4.51845	+	3.96718	+	1.81249		0.04291		4.69008	4.34682	3.66982	4.26454	1.81783	1.80715	0.0585243	0.0272956
Q2FXZ6_C11	Q2FXZ6	STVAFHTLGUK	SAOUHSC_01679	Uncharacterized protein	no		yes	4.0859	+	3.48246	+	1.99166		0.542549		4.19306	3.97874	3.31288	3.65203	2.02141	1.96192	0.510658	0.574441
Q2G2G0_C133	Q2G2G0	YDEVTIYUK	SAOUHSC_00717	Uncharacterized protein	no		yes	2.72529		2.22304	+	3.08612	+	1.94333		3.00854	2.44204	2.17019	2.27589	2.91966	3.25258	1.86711	2.01955
Q2G000_C29	Q2G000	FEAGWUPDCR	SAOUHSC_00834	Thioredoxin, putative	no		yes	5.65354	+	3.85343	+	0.570248		-0.442678		5.72791	5.57917	3.7284	3.97845	0.629184	0.511313	-0.378254	-0.507103
Q2FWD5_C4	Q2FWD5	MEVUPYLEETFK	SAOUHSC_02364	Uncharacterized protein	no		yes	6.02034	+	2.77144	+			0.673802		6.00663	6.03404	2.84623	2.69664			0.861558	0.486045
Q2G099_C193	Q2G099	VGDYUENRI	SAOUHSC_00722	Para-aminobenzoate synthase, glutamine amidotransferase, component II, putative	no		yes	5.0346	+	2.53031	+	1.2261		0.572624		5.12023	4.94897	2.5279	2.53272	1.30947	1.14274	0.558268	0.586981
Q2G1W4_C44	Q2G1W4	VAUETTVTTGMALIAGEISTTTYVDIPK	metK	S-adenosylmethionine synthase	yes	Functional site	yes	5.16126	+	2.66348	+	1.07498		0.317722		5.19798	5.12453	2.62171	2.70525	1.15452	0.995448	0.329181	0.306262
Q2FZU1_C116	Q2FZU1	TNSVGIAHGUTGK	argG	Argininosuccinate synthase	no	Functional site	yes	3.9146	+	3.0977	+	1.53534		0.0948417		3.85465	3.97455	3.11649	3.07891	1.66172	1.40895	0.0430836	0.1466
Q2G078_C716	Q2G078	LLSVEEUTSCSI	SAOUHSC_00742	Ribonucleoside-diphosphate reductase	yes		yes	5.32583	+	3.2085	+	0.700604		-0.686809		5.34894	5.30272	3.33528	3.08171	0.743386	0.657823	-0.656899	-0.716718
Q2FZJ0_C522	Q2FZJ0	GMAEAUDILK	purL	Phosphoribosylformylglycinamidine synthase subunit PurL	no		yes	5.37757	+	2.85604	+					5.38173	5.3734	2.73288	2.9792
Q2FZ72_C525	Q2FZ72	MVDTUAAEFESSTPYYYGTYETENESIVTDKEK	carB	Carbamoyl-phosphate synthase large chain	no		yes	4.92745	+	2.39637	+	1.19795		-0.313729		4.9091	4.94579	2.53426	2.25849	1.26951	1.12638	-0.149073	-0.478386
Q2FYR9_C316	Q2FYR9	QLLNDPKEUSEHR	SAOUHSC_01366	Anthranilate synthase component I	no		yes	5.34182	+	2.68044	+	0.313756		-0.153646		5.68027	5.00338	2.50749	2.8534	0.226755	0.400757	-0.286058	-0.0212333
Q2FVV9_C390	Q2FVV9	YUQAPATK	SAOUHSC_02582	Putative formate dehydrogenase SAOUHSC_02582	no		yes	4.16333	+	2.77123	+	1.19075		0.0107757		4.24405	4.08262	2.57204	2.97041	1.25011	1.13139	0.0617071	-0.0401557
Q2FW81_C278	Q2FW81	LVNVDUK	SAOUHSC_02423	Probable uridylyltransferase SAOUHSC_02423	no		yes	3.60175	+	2.68268	+	1.84148				3.60502	3.59848	2.50587	2.85949	1.96351	1.71945
Q2FZ31_C225	Q2FZ31	YFEGUMPFEVMAER	trmFO	Methylenetetrahydrofolate--tRNA-(uracil-5-)-methyltransferase TrmFO	no		yes	5.02463	+	3.0897	+					5.23718	4.81209	3.0571	3.12229
Q2FV28_C200	Q2FV28	SIEMUNDYNIFR	queH	Epoxyqueuosine reductase QueH	no		yes	4.25071	+	2.85861	+	0.970406				4.32279	4.17863	2.73916	2.97807	1.22694	0.713872
Q2FW19_C24	Q2FW19	EYTRUER	rpsZ	30S ribosomal protein S14 type Z	yes	Functional site	yes	3.67345	+	2.81346	+	1.23666		0.294735		3.8955	3.45141	2.69006	2.93685	1.29578	1.17754	0.356933	0.232538
P0A0K3_C105	P0A0K3	NDVPTFAIUHGPQILIDTDDLK	SAOUHSC_02013	Uncharacterized protein SAOUHSC_02013	no		yes	4.0304	+	2.17202	+	1.46968		0.325023		4.08507	3.97572	2.012	2.33204	1.53334	1.40602	0.284857	0.365188
Q2FXX1_C228	Q2FXX1	DUSVQRK	SAOUHSC_01709	Acetyl-CoA carboxylase, biotin carboxylase, putative	no		yes	3.89222	+	2.9571	+	1.07824		0.0161903		3.84094	3.9435	2.79716	3.11705	1.35668	0.799792	0.103665	-0.0712848
Q2G0S9_C14	Q2G0S9	NSIDUHVGNR	SAOUHSC_00465	Uncharacterized protein	no		yes	3.90524	+	2.45754	+	1.15852		0.362903		3.86057	3.94991	2.48702	2.42806	1.16511	1.15192	0.379843	0.345964
Q2FWL2_C14	Q2FWL2	TKDILILAVETSUDETSVSVIK	tsaD	tRNA N6-adenosine threonylcarbamoyltransferase	yes		yes	4.24925	+	2.20469	+	1.21728		0.1923		4.39458	4.10392	2.34605	2.06333	1.18155	1.25302	0.108759	0.275841
Q2FXM9_C410	Q2FXM9	QUSIVWGVQPVVK	pyk	Pyruvate kinase	yes		yes	3.42136	+	2.65823	+	1.6666		-0.00562012		3.60601	3.2367	2.54914	2.76731	1.73347	1.59973	0.0577744	-0.0690146
Q2FZW2_C51	Q2FZW2	LQLHGACGTUPSSTITLK	SAOUHSC_00873	Uncharacterized protein	no		yes	3.23863	+	2.99218	+	1.30644		0.185313		3.32294	3.15432	2.89949	3.08488	1.33245	1.28042	0.222928	0.147697
Q2FXL3_C60	Q2FXL3	LISVVPSIDTGVUDQQTR	tpx	Thiol peroxidase	no	Functional site	yes	4.55014	+	2.44748	+	1.1515		-0.543504		4.49294	4.60733	2.37354	2.52143	1.26879	1.03422	-0.456438	-0.63057
Q2G1W4_C275	Q2G1W4	HGGGUFSGK	metK	S-adenosylmethionine synthase	yes	Functional site	yes	3.68114	+	2.65464	+	1.15492		0.0670681		3.80095	3.56133	2.64711	2.66218	1.19711	1.11274	0.0746424	0.0594937
Q2FYP0_C224	Q2FYP0	VTATUAR	asd	Aspartate-semialdehyde dehydrogenase	no	Functional site	yes	4.29636	+	2.36863	+	1.23359		-0.379752		4.43543	4.15729	2.20389	2.53336	1.25163	1.21555	-0.379001	-0.380502
Q2FZ19_C372	Q2FZ19	IHASSHGUMEELK	rnj2	Ribonuclease J 2	yes		yes	2.80313	+	2.60811	+	1.26572		0.808694		2.9676	2.63865	2.4845	2.73173	1.46326	1.06819	0.752577	0.86481
Q2FWD4_C118	Q2FWD4	CVIGLPGGUPLGPRPIDQHIK	murA	UDP-N-acetylglucosamine 1-carboxyvinyltransferase	no	Functional site	yes	3.86704	+	2.19783	+	1.24843		0.113319		4.15196	3.58213	2.20379	2.19188	1.23097	1.26588	0.134213	0.0924252
Q2G0I6_C324	Q2G0I6	TSGAGGGDUGITIINK	SAOUHSC_00579	Phosphomevalonate kinase	yes		yes	3.77872	+	2.32591	+	1.34492		-0.0601887		3.94836	3.60907	2.29081	2.36101	1.37345	1.31638	-0.0773424	-0.043035
Q2FWW3_C407	Q2FWW3	IAFSUVEKEDIPHVFDSIAK	SAOUHSC_02158	Uncharacterized protein	no		yes	3.21587	+	2.64414	+	1.17253		0.310133		3.33414	3.09761	2.66862	2.61967	1.28315	1.06191	0.262433	0.357833
Q2G041_C134	Q2G041	GVSYUAVCDGAFFK	SAOUHSC_00785	Thioredoxin reductase	yes		yes	4.56966	+	2.5032	+	0.72791		-0.467565		4.81593	4.32339	2.53794	2.46845	0.80331	0.652509	-0.368495	-0.566635
Q2FWC9_C6	Q2FWC9	ELUFEGITLK	SAOUHSC_02370	Uncharacterized protein	no		yes	3.80319	+	2.35363	+	0.906885		0.22666		3.99777	3.60861	2.25821	2.44906	0.988094	0.825675	0.247811	0.20551
Q2G1G4_C269	Q2G1G4	FVALNYHAILDUITQSK	SAOUHSC_00160	Uncharacterized protein	no		yes	4.45309	+	2.36355	+	0.679261		-0.214341		4.4518	4.45437	2.35106	2.37604	0.719753	0.638769	-0.214742	-0.213939
Q2FZ13_C151	Q2FZ13	TESIVAGSVUAHK	SAOUHSC_01258	Uncharacterized protein	no		yes	4.96524	+	2.06501	+	0.662387		-0.460765		4.90169	5.02879	2.13218	1.99783	0.663572	0.661202	-0.509183	-0.412347
Q2FX12_C13	Q2FX12	VDVAFVCLGNIUR	ptpA	Low molecular weight protein-tyrosine-phosphatase PtpA	no	Functional site	yes	3.96376	+	2.51987	+	0.405387		0.316767		4.03756	3.88996	2.44603	2.59372	0.457929	0.352845	0.42478	0.208753
Q2FZ04_C50	Q2FZ04	AAANIGLEPEEVAIITGIGUSGR	SAOUHSC_01267	Uncharacterized protein	no		yes	3.40314	+	2.86328	+	1.16115		-0.236028		3.45904	3.34724	2.64268	3.08388	1.22712	1.09518	-0.234448	-0.237609
Q2G1R8_C60	Q2G1R8	LMGIIISENLIEUVK	SAOUHSC_00034	Uncharacterized protein	no		yes	4.22017	+	2.16043	+	0.753062				4.29859	4.14176	2.12819	2.19267	0.659651	0.846473
Q2FZ43_C86	Q2FZ43	VILMUPQGEPFSHQK	trmD	tRNA (guanine-N(1)-)-methyltransferase	yes		yes	3.59762	+	3.15465	+			0.345625		3.70122	3.49403	3.26488	3.04441			0.454176	0.237074
Q2FYG1_C43	Q2FYG1	NQDAVDELNTUHTNK	gpsA	Glycerol-3-phosphate dehydrogenase [NAD(P)+]	no		yes	4.0348	+	2.07836	+	0.859019		0.103361		4.2426	3.82701	2.04348	2.11323	0.991918	0.726119	0.199973	0.00674906
Q2G1D8_C691	Q2G1D8	NLTSMLDGYAMQUGHHLNINVFNR	pflB	Formate acetyltransferase	no		yes	4.55972	+	2.45066	+					4.70443	4.41501	2.47363	2.42769
Q2FV16_C62	Q2FV16	NNAGTGHAALUELNYTVLQPDGSIDIEK	mqo	Probable malate:quinone oxidoreductase	no		yes	2.70296	+	2.40714	+	1.58818		0.280168		2.80329	2.60262	2.3051	2.50919	1.67007	1.5063	0.200253	0.360083
Q2G1Z8_C1030	Q2G1Z8	GUTGVKR	polC	DNA polymerase III PolC-type	yes		yes	3.99082	+	2.2439	+	0.908238		-0.214695		4.17409	3.80756	2.10229	2.38551	0.918539	0.897937	-0.143421	-0.28597
Q2G2J2_C171	Q2G2J2	NLYTSGQUTYYVFDR	ssaA2	Staphylococcal secretory antigen ssaA2	yes		yes	2.8371	+	2.62878	+	1.37497		0.0275883		2.84697	2.82723	2.74013	2.51743	1.41143	1.33851	0.113034	-0.0578571
Q2FYU7_C368	Q2FYU7	GVGIENIUPFSR	katA	Catalase	no		yes	3.79706	+	2.2071	+	0.600803		0.044712		3.91762	3.67649	2.20817	2.20602	0.663663	0.537942	0.0275787	0.0618453
Q2FVI7_C80	Q2FVI7	YTVIVNDPLMRPIEAUYAR	SAOUHSC_02723	Glycerate kinase, putative	no		yes	4.59163	+	2.0121	+					4.55729	4.62597	2.00913	2.01507
Q2FY27_C185	Q2FY27	SGUIETVASATGVVNLVNFYYPK	SAOUHSC_01646	Glucokinase, putative	no		yes	2.79245	+	2.7311	+	1.29244		-0.258263		2.81213	2.77277	2.60122	2.86098	1.26087	1.324	-0.245831	-0.270695
Q2G255_C262	Q2G255	QDUVSEFYQLSDLVLLLSEK	SAOUHSC_01475	Uncharacterized protein	no		yes	3.64883	+	2.5853	+			0.305524		3.38722	3.91044	2.54681	2.6238			0.106884	0.504163
Q2G1S1_C33	Q2G1S1	VDMIAUEDTR	rsmI	Ribosomal RNA small subunit methyltransferase I	no		yes	4.19453	+	2.33605	+			-0.0347864		3.96039	4.42867	2.31441	2.35769			0.195096	-0.264668
Q2G222_C513	Q2G222	EVSDSMPYPHGQUTWYVYNR	SAOUHSC_02979	N-acetylmuramoyl-L-alanine amidase domain-containing protein SAOUHSC_02979	no		yes	2.84852	+	2.26715	+	1.23143				2.93554	2.7615	2.14828	2.38601	1.22719	1.23567
Q2FZ17_C175	Q2FZ17	EQSNHNIUYADTEIEAVNYEPR	SAOUHSC_01254	Uncharacterized protein	no		yes	3.29963	+	2.15391	+	1.25859		-0.38117		3.52444	3.07481	2.12684	2.18098	1.28582	1.23137	-0.334007	-0.428333
Q2G0P8_C37	Q2G0P8	FDUVPSQLNYVIK	ctsR	Transcriptional regulator CtsR	no		yes	3.82043	+	2.08246	+	0.557879		-0.135871		4.01641	3.62445	2.09822	2.06671	0.480886	0.634872	-0.345015	0.0732718
Q2FVV9_C147	Q2FVV9	YDPNQUILCGR	SAOUHSC_02582	Putative formate dehydrogenase SAOUHSC_02582	no	Functional site	yes	3.44892	+	2.14249	+	0.665543		-0.00813085		3.51891	3.37893	1.9948	2.29019	0.692874	0.638213	-0.109281	0.0930192
Q2G0I6_C95	Q2G0I6	SUDIAMK	SAOUHSC_00579	Phosphomevalonate kinase	yes		yes	4.14503	+	2.06688	+					4.21762	4.07245	2.02581	2.10796
Q2FXK3_C85	Q2FXK3	FTDISIEQQSIGTAULNNGK	SAOUHSC_01831	Uncharacterized protein	no		yes			2.8494	+	2.16858	+	1.06937				2.73645	2.96235	2.24576	2.09139	1.1169	1.02184
Q2G0S2_C173	Q2G0S2	DDPNINPEEUVVVSPDHGGVTR	prs	Ribose-phosphate pyrophosphokinase	yes		yes	4.054	+	2.02522	+	0.684009		-0.726719		4.11858	3.98942	2.07993	1.97051	0.715811	0.652207	-0.589333	-0.864105
Q2FVV9_C934	Q2FVV9	TSURLEVITK	SAOUHSC_02582	Putative formate dehydrogenase SAOUHSC_02582	no		yes	3.34471	+	2.28414	+	0.642977		-0.259755		3.43069	3.25873	2.40803	2.16024	0.698396	0.587557	-0.223744	-0.295765
Q2G0S3_C100	Q2G0S3	EGTTIVVUGDTPLITK	glmU	Bifunctional protein GlmU	yes	Functional site	yes	3.87861	+	2.30682	+	0.258942		-0.550364		4.12962	3.62761	2.42812	2.18553	0.540929	-0.0230454	-0.499341	-0.601387
Q2G1J4_C258	Q2G1J4	VNIHQPGPGVGGHULAVDPYFIIAK	SAOUHSC_00128	Cap5O protein/UDP-N-acetyl-D-mannosaminuronic acid dehydrogenase	no		yes	4.12849	+	2.44346	+	0.0631133		-0.773276		4.14299	4.11398	2.36076	2.52617	0.0851349	0.0410917	-0.712215	-0.834337
Q2FZW2_C48	Q2FZW2	LQLHGAUGTCPSSTITLK	SAOUHSC_00873	Uncharacterized protein	no		yes	3.34051	+	2.80248	+	0.479929		-0.890824		3.48556	3.19546	2.75448	2.85048	0.594166	0.365693	-0.896254	-0.885393
Q2FXV6_C102	Q2FXV6	TPNPDVMUNK	mnmA	tRNA-specific 2-thiouridylase MnmA	yes	Functional site	yes	3.40739	+	2.24021	+	0.920075		-0.845415		3.44061	3.37417	2.10873	2.3717	1.00043	0.839718	-0.9407	-0.75013
Q2FZJ1_C148	Q2FZJ1	VIYPVAHGEGHYYUTDEIYQQLK	purQ	Phosphoribosylformylglycinamidine synthase subunit PurQ	no		yes	2.2461	+	2.35949	+	1.33767		-0.281964		2.35007	2.14212	2.50482	2.21416	1.23174	1.44361	-0.564649	0.000721167
Q2FVQ5_C63	Q2FVQ5	LAQPGEESSNVWNNAGTGHSALUELNYTK	mqo	Probable malate:quinone oxidoreductase	no		yes	3.84927	+	2.49156	+	0.0445204		-0.948406		4.04536	3.65317	2.35024	2.63287	0.0600474	0.0289934	-0.912537	-0.984274
Q2FXP2_C153	Q2FXP2	GVNDNQLDIEAFDIFSNASUTTNCIGPVAK	SAOUHSC_01794	Glyceraldehyde-3-phosphate dehydrogenase	no	Functional site	yes	2.39075	+	2.01111	+	0.922915		-0.241255		2.52567	2.25583	1.89832	2.1239	0.997112	0.848718	-0.158236	-0.324274
Q2FXX2_C221	Q2FXX2	EVTLQADTIUVHGDGEHALLFVSK	SAOUHSC_01708	UPF0271 protein SAOUHSC_01708	no		yes	2.79184	+	2.19086	+	0.338185		-0.826187		2.77733	2.80634	2.18744	2.19429	0.416725	0.259646	-0.756203	-0.896171
Q2G0A0_C105	Q2G0A0	GGUSPVGMK	SAOUHSC_00705	Cys-tRNA(Pro)/Cys-tRNA(Cys) deacylase	no		yes	2.66353	+	2.48718	+	-0.117506		-0.680047		2.7721	2.55496	2.42691	2.54745	-0.122413	-0.1126	-0.601299	-0.758794
Q2FXG1_C254	Q2FXG1	LHSAULTGDIFHSQR	ribBA	Riboflavin biosynthesis protein RibBA	no	Functional site	yes	3.59887		3.97724	+	1.94413		0.663303		3.24048	3.95726	4.01855	3.93593	1.93644	1.95181	0.617581	0.709026
Q2FY43_C372	Q2FY43	IESAUYTNYTIPPYYDSMVAK	SAOUHSC_01623	Acetyl-CoA carboxylase, biotin carboxylase	yes		no	4.08941	+	2.51476		1.94733				3.90188	4.27694	1.71	3.31952	1.75322	2.14143
Q2FXJ9_C125	Q2FXJ9	LQNISTNLADUFNLNEQLPLQFLDNVK	SAOUHSC_01835	Uncharacterized protein	no		no	4.55708	+	1.85399		1.02744		0.931577		4.68728	4.42687	1.85929	1.84868	1.1155	0.939377	0.904349	0.958806
Q2G007_C47	Q2G007	ENYFUDR	SAOUHSC_00821	Uncharacterized protein	no		no	3.03316	+	1.91481		1.77013		1.50034		3.17097	2.89535	1.85264	1.97699	1.78301	1.75725	1.43359	1.56708
Q2G0I3_C91	Q2G0I3	LFTGDEGSHUQIAR	SAOUHSC_00582	Uncharacterized protein	no		no	4.34266	+	1.6985		1.49291		0.512977		4.49953	4.18579	1.50686	1.89014	1.5511	1.43472	0.631989	0.393965
Q2G0G1_C37	Q2G0G1	ALKPGEALVQTEYCGVUHTDLHVK	adh	Alcohol dehydrogenase	no	Functional site	no	2.55151	+	3.79749		1.50372		-0.00597297		2.58688	2.51614	3.47936	4.11562	1.60947	1.39797	0.0211954	-0.0331414
Q2FVV9_C157	Q2FVV9	CVEAUQDIEVNETIR	SAOUHSC_02582	Putative formate dehydrogenase SAOUHSC_02582	no	Functional site	yes	3.14437		3.17468	+	1.39657		-0.144209		2.2433	4.04544	3.16728	3.18209	2.14264	0.650489	-0.150785	-0.137632
Q2G2W9_C198	Q2G2W9	ISGAUGR	SAOUHSC_00455	Uncharacterized protein	no		yes	3.39067		2.23597	+	1.54309		0.318024		2.96331	3.81803	2.17188	2.30007	1.90292	1.18326	0.255319	0.380729
Q2FWH6_C63	Q2FWH6	IQIDKPDVILLDLGLPDKDGLULISEIR	SAOUHSC_02315	DNA-binding response regulator, putative	no		no	4.24321	+	2.52126		0.57113		0.105214		4.51437	3.97205	2.81789	2.22463	0.577248	0.565012	-0.0475471	0.257976
Q2G2W9_C161	Q2G2W9	LLGGIGPUGR	SAOUHSC_00455	Uncharacterized protein	no		no	3.83423	+	2.02302		1.1823		0.388085		3.61988	4.04858	1.78935	2.25668	0.804962	1.55964	0.510253	0.265917
Q2FVY1_C156	Q2FVY1	IKNDUDTQLT	SAOUHSC_02541	Molybdopterin-guanine dinucleotide biosynthesis protein MobB	no		no	4.08103	+	1.74983		1.00829		0.424984		4.10115	4.06091	1.6402	1.85945	0.963326	1.05325	0.558953	0.291014
Q2G1T3_C54	Q2G1T3	ATNPEQLFAAGYASUFNGAFDLILK	SAOUHSC_00831	Organic hydroperoxide resistance protein-like	no		yes	2.05702		2.40759		2.03627	+	0.669435		2.22586	1.88819	2.08536	2.72981	2.14245	1.93009	0.670206	0.668664
Q2FYP0_C126	Q2FYP0	GIIANPNUSTIQSVVPLK	asd	Aspartate-semialdehyde dehydrogenase	no	Functional site	no	3.94466	+	1.98643		1.189		0.0227324		4.06221	3.82711	2.06108	1.91177	1.24556	1.13245	0.0313952	0.0140696
Q2G0D6_C152	Q2G0D6	EFETNUDGILR	SAOUHSC_00669	Uncharacterized protein	no		no	3.81404	+	2.3171		0.820679		0.136409		3.9878	3.64028	2.74987	1.88432	0.898154	0.743204	0.181737	0.0910809
Q2FYQ9_C61	Q2FYQ9	SIUNCPHADGR	SAOUHSC_01376	Uncharacterized protein	no		yes	2.75599		4.05252	+	0.467503		-0.273801		2.50312	3.00886	3.78538	4.31967	0.624496	0.31051	-0.303082	-0.244519
Q2FVV9_C150	Q2FVV9	YDPNQCILUGR	SAOUHSC_02582	Putative formate dehydrogenase SAOUHSC_02582	no	Functional site	no	3.5763	+	2.88237		0.597017		-0.0862653		3.78398	3.36863	1.97052	3.79421	0.847275	0.346758	-0.0990463	-0.0734843
Q2G1X7_C40	Q2G1X7	CSWUDSAFTWDGSAK	queE	7-carboxy-7-deazaguanine synthase	no	Functional site	no	3.86896	+			2.08478		0.753233		3.82365	3.91428			1.85913	2.31043	0.925164	0.581303
Q2G1S4_C254	Q2G1S4	MIUSSGNVDSNR	SAOUHSC_00018	Replicative DNA helicase	yes		no	4.74694	+	1.95773		0.275119		-0.276459		4.88796	4.60591	1.83402	2.08144	0.417596	0.132643	-0.262209	-0.290709
Q2G001_C77	Q2G001	QQUHYDAVTK	SAOUHSC_00833	Uncharacterized protein	no		no	3.37063	+	1.76659		1.2833		0.181971		3.36983	3.37143	1.75792	1.77526	1.43924	1.12736	0.193316	0.170627
Q2FVS9_C61	Q2FVS9	AVUGFSK	SAOUHSC_02613	Uncharacterized protein	no		yes	3.0215		2.47306	+	1.04128		0.0473831		2.61339	3.42962	2.41689	2.52922	1.02751	1.05506	0.132906	-0.0381396
Q2G0I6_C304	Q2G0I6	YLUDIAEK	SAOUHSC_00579	Phosphomevalonate kinase	yes		no	4.05678	+	1.90431		0.889447		-0.280817		4.23818	3.87539	1.80012	2.00849	0.932742	0.846152	-0.175713	-0.385922
Q7X2S2_C190	Q7X2S2	NIVIAUGGGGIPVIK	arcC2	Carbamate kinase 2	no		no	3.49027	+	1.60888		1.25268		0.197981		3.5782	3.40235	1.4393	1.77846	1.11293	1.39243	0.403421	-0.00745807
Q2G273_C69	Q2G273	IIGVETGGUPHTAIR	ureG	Urease accessory protein UreG	no		no	4.30337	+			1.47006		0.699415		3.97435	4.63238			1.31545	1.62466	0.743386	0.655443
Q2FY10_C33	Q2FY10	QUKNELLR	SAOUHSC_01664	Putative pyruvate, phosphate dikinase regulatory protein	no		no	5.47107	+	1.62738		0.0597709		-0.755226		5.70664	5.2355	1.58986	1.66489	0.0943712	0.0251706	-0.846324	-0.664128
Q2FYQ9_C23	Q2FYQ9	GFNYYQSEUVINLK	SAOUHSC_01376	Uncharacterized protein	no		yes	2.27608		2.13261	+	1.31173		0.597445		2.45599	2.09616	2.06698	2.19824	1.31504	1.30842	0.621806	0.573084
Q2G255_C322	Q2G255	HGETGFVVDVGDUDSASDYAIR	SAOUHSC_01475	Uncharacterized protein	no		no	4.21364	+	2.08797				0.0149721		4.30385	4.12342	2.2603	1.91564			0.0805212	-0.0505771
Q2G230_C90	Q2G230	VVLUDRYIDSSLAYQGYAR	tmk	Thymidylate kinase	yes		no	2.62916	+	1.69757		1.7389		0.241654		2.58289	2.67543	1.7835	1.61164	1.70439	1.77341	0.424922	0.0583858
Q2FWG2_C190	Q2FWG2	VTGAGULLGGVIAGFLFR	thiM	Hydroxyethylthiazole kinase	no	Functional site	no	3.49708	+	1.16028		1.16968		0.479528		3.50424	3.48993	0.764006	1.55655	1.1626	1.17677	0.328836	0.630219
Q2FYG1_C250	Q2FYG1	LGADPMTFLGLGGIGDLIVTUTSTHSR	gpsA	Glycerol-3-phosphate dehydrogenase [NAD(P)+]	no		no	4.35797	+	1.48028		0.562719		-0.124564		4.51942	4.19653	1.54042	1.42013	0.611645	0.513794	-0.13253	-0.116598
Q2G0I3_C134	Q2G0I3	TIKDVIEDIQKEDLUHENI	SAOUHSC_00582	Uncharacterized protein	no		no	4.14122	+	2.05156		0.381733		-0.367186		4.19692	4.08551	1.83835	2.26478	0.491083	0.272382	-0.343238	-0.391134
Q2FZG9_C406	Q2FZG9	AHGETGVEUGVEEDNVFIFDIGDVLALTHDSAR	rnj1	Ribonuclease J 1	yes		no	3.16426	+	1.62501		1.20304		0.120581		3.29634	3.03219	1.47628	1.77374	1.23174	1.17434	0.130799	0.110363
Q2G2P7_C503	Q2G2P7	QSIYQTTAUH	hutH	Histidine ammonia-lyase	no		no	2.59088	+	1.09601		1.32529		1.05619		2.688	2.49375	0.824483	1.36754	1.42857	1.222	1.04124	1.07114
Q2G292_C238	Q2G292	GEDIGYGHTVNVPLEPYTEDASFLEUFK	SAOUHSC_01849	Uncharacterized protein	no		no	4.53159	+	1.80448		0.0890982		-0.383506		4.81829	4.24489	2.35304	1.25592	0.182184	-0.00398734	-0.445048	-0.321964
Q2G078_C191	Q2G078	GELVSUFLLEVDDSLNSINFIDSTAK	SAOUHSC_00742	Ribonucleoside-diphosphate reductase	yes		no	4.00578	+	1.97288		0.52636		-0.492551		4.14053	3.87103	1.86162	2.08414	0.559211	0.493509	-0.489052	-0.496049
Q2FW29_C11	Q2FW29	PSVKPIUEK	rpmJ	50S ribosomal protein L36	yes		yes	1.77459		2.90339	+	1.37619		-0.0480218		1.96956	1.57962	2.84901	2.95777	1.42738	1.32501	0.0378794	-0.133923
Q2G078_C403	Q2G078	MSNLUTEIFQLQETSIINDYGIEDEIK	SAOUHSC_00742	Ribonucleoside-diphosphate reductase	yes		no	4.1796	+	1.90018		0.438032		-0.518305		4.24641	4.11278	1.85284	1.94752	0.459117	0.416948	-0.454704	-0.581907
Q2FXU4_C191	Q2FXU4	HFEPVIHEFUSDCQSR	hisS	Histidine--tRNA ligase	yes		yes	1.27889		2.34444	+	1.37027		0.990084		1.45486	1.10293	2.31696	2.37192	1.34301	1.39753	1.03351	0.946656
Q2G0Q0_C75	Q2G0Q0	EALQNSTLPMFGTUAGLIVLAQDIVGEEGYLNK	pdxT	Pyridoxal 5'-phosphate synthase subunit PdxT	no	Functional site	no	2.10134	+	1.4495		1.27669		1.02603		2.22848	1.9742	1.48238	1.41662	1.30515	1.24823	1.01764	1.03443
Q2FXA4_C259	Q2FXA4	NFIYTPVGFVUEHLEVLYDNDYECK	hemH	Ferrochelatase	no	Functional site	no	2.6537	+	2.58453		0.758391		-0.154497		2.7135	2.5939	2.30921	2.85985	0.805375	0.711407	-0.118523	-0.19047
Q2FY04_C92	Q2FY04	ASLVSAISQGYRPGDFESITVTVDADKPSSPCGAUR	SAOUHSC_01670	Cytidine deaminase	no		no	2.10957	+	2.31335		1.30906		0.0987528		1.96717	2.25196	1.93134	2.69535	1.33474	1.28339	0.659285	-0.46178
Q2G099_C141	Q2G099	YHSLIADGATFPNULK	SAOUHSC_00722	Para-aminobenzoate synthase, glutamine amidotransferase, component II, putative	no		no	2.67872	+	1.82351		1.12026		0.1535		2.73563	2.62181	1.57526	2.07176	0.98061	1.25991	0.0897693	0.217231
Q2FXT6_C269	Q2FXT6	GMDMFDUVLPTR	tgt	Queuine tRNA-ribosyltransferase	no	Functional site	no	2.68133	+	1.54411		1.50911				2.78921	2.57345	1.03365	2.05457	1.53471	1.48352
Q2FVI7_C265	Q2FVI7	SVNQIPGSGAAGGMGAALLAFUETTLTK	SAOUHSC_02723	Glycerate kinase, putative	no		no	3.03298	+	1.66042		1.00589		0.0133483		3.04663	3.01933	1.8279	1.49293	1.02963	0.982145	-0.395644	0.422341
O05204_C335	O05204	GVAFUPHCDGPLFENK	ahpF	Alkyl hydroperoxide reductase subunit F	no		no	3.40341	+	1.61688		0.551235		0.115225		3.53244	3.27438	1.59565	1.63812	0.58323	0.51924	0.0330882	0.197362
Q2FZJ1_C13	Q2FZJ1	FAVLVFPGSNUDR	purQ	Phosphoribosylformylglycinamidine synthase subunit PurQ	no		no	3.35848	+	1.84205		0.507747		-0.0730511		3.40931	3.30765	1.90458	1.77951	0.535953	0.479541	-0.0312236	-0.114879
Q2FZ69_C16	Q2FZ69	HUNEFINHSNDSNLSSSHDVDESSTK	SAOUHSC_01173	Uncharacterized protein	no		no	3.51552	+			1.40554		0.702933		3.74477	3.28627			1.44377	1.36732	0.214747	1.19112
Q2G0M5_C287	Q2G0M5	QGIANSWPDSIDTSUSR	SAOUHSC_00535	Uncharacterized epimerase/dehydratase SAOUHSC_00535	no		no	2.81579	+	1.29774		1.39539		0.080779		3.00668	2.6249	1.33472	1.26075	1.38771	1.40307	0.067439	0.094119
Q2FZS8_C397	Q2FZS8	AIDLVDQAUATIR	clpB	Chaperone protein ClpB	no		no	3.03355	+	2.02004		0.609703		-0.0813331		3.12176	2.94533	1.85215	2.18792	0.626616	0.59279	-0.07763	-0.0850363
Q2FZ70_C35	Q2FZ70	SPIYUDNR	pyrE	Orotate phosphoribosyltransferase	no		no	2.9078	+	1.99627		0.713528		-0.0686462		3.07847	2.73712	2.01863	1.97391	0.789771	0.637286	-0.0442056	-0.0930868
Q2FXX1_C49	Q2FXX1	GDEQSLHVHLADQAIUIGEANALDSYLNIDR	SAOUHSC_01709	Acetyl-CoA carboxylase, biotin carboxylase, putative	no		no	2.47521	+	2.46183		0.704828		-0.178723		2.3838	2.56662	2.1431	2.78056	0.764601	0.645056	-0.111103	-0.246344
Q2G1Z3_C173	Q2G1Z3	TDIIFLDEPTTYLDIUHQLEILELVQK	SAOUHSC_00652	Iron compound ABC transporter, ATP-binding protein	no		no	4.34945	+	1.42209		0.286477		-0.59654		4.46963	4.22928	1.55282	1.29137	0.420186	0.152768	-0.685292	-0.507788
Q2FZ86_C101	Q2FZ86	MULFEPR	sepF	Cell division protein SepF	yes		no	2.79746	+	1.85971		1.01916		-0.28402		2.96835	2.62658	1.78471	1.93471	1.04977	0.988557	-0.282088	-0.285952
Q53727_C597	Q53727	IUYVAITR	pcrA	ATP-dependent DNA helicase PcrA	yes		no	3.59324	+	1.83937		0.334969		-0.413052		3.60067	3.5858	1.82594	1.85281	0.340178	0.329759	-0.449136	-0.376967
Q2FUV5_C95	Q2FUV5	TGLYSUVDDHLIEAR	SAOUHSC_02996	Peptide methionine sulfoxide reductase, putative	no		no	3.01992	+			1.45269		0.871293		3.07265	2.96719			1.65411	1.25126	0.850079	0.892508
Q2FZ13_C226	Q2FZ13	VVEHPDLFVETSTUTMEDFDYIIELR	SAOUHSC_01258	Uncharacterized protein	no		no	4.40734	+			0.934618				4.54028	4.27441			0.794936	1.0743
O06446_C829	O06446	NDDUPCGSGK	secA1	Protein translocase subunit SecA 1	yes	Functional site	yes	1.71699		2.96405	+	0.511933		0.142507		1.86683	1.56716	2.91812	3.00997	0.545914	0.477952	0.240453	0.0445598
Q2FWF5_C94	Q2FWF5	IALFAGIDKUR	fabZ	3-hydroxyacyl-[acyl-carrier-protein] dehydratase FabZ	yes		yes	2.66057		2.16389	+	0.696169		-0.187608		3.10873	2.21241	2.00155	2.32622	0.721679	0.670659	-0.146899	-0.228317
Q2FYN4_C349	Q2FYN4	LUESGDIIIK	lysA	Diaminopimelate decarboxylase	no	Functional site	no	2.77437	+	1.28404		1.12546		0.0885763		2.91778	2.63097	1.22271	1.34538	1.17296	1.07796	0.115277	0.0618751
Q2G1S1_C43	Q2G1S1	LUNHYDIPTPLK	rsmI	Ribosomal RNA small subunit methyltransferase I	no		yes			3.29932	+	1.71791		0.244107				3.19374	3.4049	1.81725	1.61857	0.337654	0.15056
Q2G2U6_C65	Q2G2U6	DGMEVUR	walR	Transcriptional regulatory protein WalR	yes		no	3.48151	+	1.77758		0.620875		-0.624579		3.60336	3.35966	1.66934	1.88581	0.631523	0.610228	-0.627226	-0.621932
Q2FZG9_C191	Q2FZG9	MAQLGEEGVLULLSDSTNSLVPDFTLSER	rnj1	Ribonuclease J 1	yes		no	2.65076	+	1.58471		1.31621		-0.310369		2.80507	2.49646	1.40283	1.7666	1.37601	1.25641	-0.319028	-0.30171
Q2FV16_C373	Q2FV16	EGUMNHLR	mqo	Probable malate:quinone oxidoreductase	no		no	2.73656	+	1.84087		1.02037		-0.36635		2.85975	2.61337	1.68001	2.00173	1.05977	0.980976	-0.489382	-0.243318
Q2G0Y9_C176	Q2G0Y9	LEEAGLTVSSLUK	xpt	Xanthine phosphoribosyltransferase	no		no	4.30244	+	1.34285		0.231339		-0.65624		4.03386	4.57101	1.29525	1.39045	0.310689	0.151989	-0.657013	-0.655467
Q2FVW3_C186	Q2FVW3	GLIDDIDLKHPDUAK	SAOUHSC_02579	Uncharacterized protein	no		no	2.53915	+	1.77418		1.21525		-0.324185		2.68737	2.39093	1.56744	1.98093	1.43635	0.994155	-0.368319	-0.280051
Q2G2V3_C193	Q2G2V3	NHYASAIGUK	menE	2-succinylbenzoate--CoA ligase	no		no	3.50605	+	1.70878		0.456318		-0.476717		3.61636	3.39575	1.43141	1.98616	0.613626	0.29901	-0.415634	-0.537801
P0A0B7_C168	P0A0B7	NPGEVUPAK	ahpC	Alkyl hydroperoxide reductase C	no		yes	2.36281		2.56082	+	0.5085		-0.265484		2.59297	2.13265	2.5585	2.56314	0.640711	0.376288	-0.19794	-0.333029
Q2G1Z3_C260	Q2G1Z3	TGKPLLVTYDLUR	SAOUHSC_00652	Iron compound ABC transporter, ATP-binding protein	no		no	4.21185	+	1.50773		0.352387		-0.918596		4.1398	4.28391	1.37128	1.64418	0.416948	0.287827	-1.05468	-0.78251
Q2FZ04_C19	Q2FZ04	NNVKPNWCPGUGDFSVQAAIQK	SAOUHSC_01267	Uncharacterized protein	no		no	3.00041	+	2.27341		0.477865		-0.614105		2.93397	3.06685	1.88069	2.66614	0.470303	0.485427	-0.689823	-0.538388
Q2G282_C142	Q2G282	MEIYGVUK	perR	Peroxide-responsive repressor PerR	no	Functional site	no	3.34884	+	1.80592		0.37921		-0.396989		3.48732	3.21036	1.78781	1.82403	0.416301	0.342119	-0.38694	-0.407038
Q2G2V4_C24	Q2G2V4	FISPLTPPTUR	SAOUHSC_01914	Putative membrane protein insertion efficiency factor	no		no	3.48411	+	1.5274		0.35599		-0.240212		3.47521	3.49301	1.46441	1.59039	0.271665	0.440314	-0.277569	-0.202854
Q2FY71_C35	Q2FY71	AEQIIDUAVENGITYFDTADMYDK	SAOUHSC_01594	Uncharacterized protein	no		no	3.32242	+	1.89196		0.303627		-0.416141		3.2712	3.37365	1.46683	2.31708	0.204642	0.402613	-0.335244	-0.497038
Q2FZC7_C100	Q2FZC7	QSUSAIVDQLEQPIR	SAOUHSC_01105	Iron-sulphur subunit of succinate dehydrogenase, putative	no		yes			2.82628	+	1.68073		0.587684			2.67285	2.67663	2.97593	1.69182	1.66965	0.705146	0.470222
Q2FY55_C54	Q2FY55	QDGTTLVMINSVCGUAGGIAR	SAOUHSC_01610	UPF0403 protein SAOUHSC_01610	no		no	3.79649	+			1.22843				3.74459	3.8484			1.32981	1.12704
Q2G2W9_C105	Q2G2W9	LVNUEYTLDK	SAOUHSC_00455	Uncharacterized protein	no		no	2.36975	+	1.67086		0.977748				2.33954	2.39996	1.67238	1.66934	1.03787	0.917623
Q2G243_C99	Q2G243	STLLLQIUASLSQK	radA	DNA repair protein RadA	no		yes	2.79211		2.07698	+	0.536504		-0.394181		3.46284	2.12138	2.15105	2.00292	0.574247	0.498761	-0.38163	-0.406732
Q2FZC7_C228	Q2FZC7	LNALMGTGGLQQUGNSQNCVNACPK	SAOUHSC_01105	Iron-sulphur subunit of succinate dehydrogenase, putative	no		no	2.46991	+	2.12261		0.402003				2.60921	2.33062	1.9042	2.34102	0.407407	0.396598
Q2FZ66_C131	Q2FZ66	IGUTFCASTLGGLKR	rlmN	Probable dual-specificity RNA methyltransferase RlmN	no	Functional site	yes			3.59976	+			1.38778				3.54794	3.65157			1.49835	1.27721
Q2FZ31_C52	Q2FZ31	FAELVUSNSLR	trmFO	Methylenetetrahydrofolate--tRNA-(uracil-5-)-methyltransferase TrmFO	no		no	3.6311	+	1.56696		0.250839		-0.488522		3.54146	3.72075	1.52321	1.61072	0.287487	0.214192	-0.43159	-0.545455
Q2FWD6_C279	Q2FWD6	VVNNTGQVUTAGTR	SAOUHSC_02363	Putative aldehyde dehydrogenase SAOUHSC_02363	no	Functional site	no	2.72817	+	1.46002		0.743558		0.0262856		2.89672	2.55961	1.44642	1.47363	0.744075	0.743041	0.0102069	0.0423642
Q2G0Q5_C80	Q2G0Q5	TEEULHR	SAOUHSC_00491	2-amino-4-hydroxy-6-hydroxymethyldihydropteridine pyrophosphokinase	yes		no	4.11339	+			0.834838		-0.0708748		4.20414	4.02263			0.80091	0.868766	-0.0475471	-0.0942024
Q2FW19_C43	Q2FW19	IUFRELAYK	rpsZ	30S ribosomal protein S14 type Z	yes	Functional site	no	2.77477	+	1.95145		0.599473		-0.527011		2.96048	2.58906	1.79575	2.10715	0.635396	0.563551	-0.521673	-0.532349
Q2G1C4_C229	Q2G1C4	IDHAFEUVGGK	tarJ'	Ribulose-5-phosphate reductase 2	no		no	3.08013	+	1.77399		0.380099		-0.479628		3.048	3.11227	1.91507	1.63291	0.545079	0.215119	-0.471049	-0.488208
Q2FVV9_C386	Q2FVV9	QVIGTNNVDNUSR	SAOUHSC_02582	Putative formate dehydrogenase SAOUHSC_02582	no		no	3.1027	+	1.55488		0.557238		-0.479667		3.23274	2.97266	1.42664	1.68311	0.558464	0.556012	-0.465082	-0.494251
Q2G037_C225	Q2G037	LVNUETANLNK	whiA	Putative sporulation transcription regulator WhiA	no		no	2.82361	+	1.22954		0.67505		-0.00507849		2.86194	2.78528	0.605968	1.85312	0.825134	0.524966	0.0803848	-0.0905418
Q2G0N0_C82	Q2G0N0	HYAHVDUPGHADYVK	tuf	Elongation factor Tu	yes	Functional site	no	2.39981	+	1.59487		0.688135		-0.0670237		2.51499	2.28463	1.41508	1.77466	0.667454	0.708816	-0.0814954	-0.052552
Q2FZP4_C112	Q2FZP4	TLMAVDSAVMVIDUAK	prfC	Peptide chain release factor 3	no		yes	2.55051		2.06382	+					2.7589	2.34213	1.91299	2.21465
Q2G2A1_C55	Q2G2A1	IIAGGYNGSVAGEVHCIDEGCLIEDGHUIR	SAOUHSC_01692	Uncharacterized protein	no	Functional site	yes			3.51284	+	1.08865		-0.0302558				3.61046	3.41522	1.09099	1.08631	-0.0174901	-0.0430215
Q2FXP2_C202	Q2FXP2	SUNESIIPTSTGAAK	SAOUHSC_01794	Glyceraldehyde-3-phosphate dehydrogenase	no		no	3.51	+	1.08805		0.496197		-0.621486		3.64386	3.37615	0.938474	1.23762	0.521051	0.471344	-0.644645	-0.598326
Q2FWC6_C175	Q2FWC6	VRDEDFEEUDLITIEGSVFGEWLDELRDDHK	SAOUHSC_02372	Uncharacterized protein	no		no	3.79732	+			0.552425		0.119332		3.98914	3.60549			0.66029	0.444561	0.127765	0.110898
Q2FYR0_C129	Q2FYR0	LASUIDVANIDTPIK	SAOUHSC_01375	Uncharacterized protein	no		no	3.65619	+			0.773805		0.0317337		3.81117	3.5012			0.633199	0.914411	-0.160943	0.224411
Q2FXX1_C255	Q2FXX1	QQIUNDAVK	SAOUHSC_01709	Acetyl-CoA carboxylase, biotin carboxylase, putative	no		no	2.77871	+	1.7121		0.712192		-0.750753		2.91538	2.64204	1.41138	2.01282	0.78654	0.637844	-0.715275	-0.786231
Q2G1Z3_C191	Q2G1Z3	LNQEQGUTIVMVLHDINQAIR	SAOUHSC_00652	Iron compound ABC transporter, ATP-binding protein	no		no	3.54763	+	1.63588		0.108842		-0.878638		3.63215	3.4631	1.97739	1.29437	0.222063	-0.004378	-0.872974	-0.884301
Q2G1Z8_C1138	Q2G1Z8	TIPVDDKEVMQIFSTPESLGVTEDEILUK	polC	DNA polymerase III PolC-type	yes		no	4.41293	+							4.48723	4.33864
Q2G0W6_C69	Q2G0W6	VLIEQMAQHUEAFK	SAOUHSC_00408	Uncharacterized protein	no		no	4.39007	+							4.19975	4.58039
Q2G0S3_C379	Q2G0S3	TNIGUGTITVNYDGENK	glmU	Bifunctional protein GlmU	yes	Functional site	no	3.76243	+	1.31473		0.257469		-0.946806		3.92723	3.59763	1.19773	1.43172	0.282274	0.232665	-0.932085	-0.961527
Q2FUR2_C161	Q2FUR2	SEFNDHUASPY	SAOUHSC_03041	Uncharacterized protein	no		no	4.38704	+							4.07724	4.69683
Q2FZJ0_C496	Q2FZJ0	NLIAVGATPLAMTDULNYGSPEK	purL	Phosphoribosylformylglycinamidine synthase subunit PurL	no	Functional site	no	4.38476	+							4.33333	4.4362
Q2FZ60_C5	Q2FZ60	QUFVTGR	rpmB	50S ribosomal protein L28	yes		no	5.43641	+	0.925942		-0.529271		-1.46765		5.70367	5.16914	0.636723	1.21516	-0.403284	-0.655259	-1.25739	-1.67792
Q2FZ04_C199	Q2FZ04	LIEDAINHDGFSFVNVFSPUVTYNK	SAOUHSC_01267	Uncharacterized protein	no		no	2.45007	+	1.72062		0.63763		-0.457547		2.54189	2.35826	1.72526	1.71598	0.719052	0.556209	-0.460687	-0.454407
Q2FVP8_C265	Q2FVP8	LDMHDDUR	SAOUHSC_02654	Ferredoxin--NADP reductase	no		no	4.26937	+							4.27415	4.2646
Q2FWK9_C68	Q2FWK9	LHHMDUYR	SAOUHSC_02280	Uncharacterized protein	yes		no	4.2596	+							4.38474	4.13447
Q2FXA5_C343	Q2FXA5	TSDTDITAUTWTSK	SAOUHSC_01960	Protoporphyrinogen oxidase	no		no	3.15193	+	1.36678		0.46853		-0.732146		3.35292	2.95094	1.82721	0.906352	0.572599	0.36446	-0.399102	-1.06519
Q2FZR4_C49	Q2FZR4	AIENISFDIYKGETLGLVGESGUGK	SAOUHSC_00926	Oligopeptide ABC transporter, ATP-binding protein, putative	no	Functional site	no	3.37796	+	1.29261		0.134457		-0.558969		3.36443	3.39149	1.09707	1.48816	0.109026	0.159887	-0.572094	-0.545845
Q2G038_C196	Q2G038	EADLIVLGPGSLYTSVISNLUVNGISDALIHSDAPK	SAOUHSC_00788	Gluconeogenesis factor	yes		no	2.39581	+	1.76911		0.280265		-0.204468		2.49605	2.29558	1.70783	1.83038	0.217975	0.342555	0.0187766	-0.427712
Q2G0T6_C124	Q2G0T6	AQEYSTVVVDHUFDYFEK	SAOUHSC_00441	Uncharacterized protein	no		no	4.23233	+							3.93234	4.53232
Q2FXX1_C243	Q2FXX1	LIEESPUAALTEER	SAOUHSC_01709	Acetyl-CoA carboxylase, biotin carboxylase, putative	no		no	2.17234	+	1.38999		0.808104		-0.138728		2.30653	2.03814	1.24981	1.53017	0.829444	0.786764	-0.093728	-0.183729
Q2FXU8_C317	Q2FXU8	IPLSQAVIELULSPK	SAOUHSC_01734	Uncharacterized protein	no		no	2.49054	+	1.80952		0.37149		-0.509924		2.64653	2.33454	1.77201	1.84703	0.435202	0.307778	-0.657764	-0.362084
Q2G1T2_C21	Q2G1T2	MDNHNQCNYVNPQNVSLDWEUFIISK	SAOUHSC_00826	Uncharacterized protein	no		no	4.12746	+							4.15478	4.10014
Q2FZT0_C39	Q2FZT0	VNVDDEGVCTVDMTLTSMGUPMGPQIIDQVK	SAOUHSC_00910	Uncharacterized protein	no		no	4.12327	+							4.23496	4.01159
Q2FY10_C245	Q2FY10	IQEELNYFEEIVSEIGUPVIDVSQK	SAOUHSC_01664	Putative pyruvate, phosphate dikinase regulatory protein	no		no	4.23516	+	1.2325		-0.197717		-1.15915		4.33077	4.13955	1.24696	1.21804	-0.113645	-0.28179	-1.14044	-1.17785
Q2FXI8_C126	Q2FXI8	LSVLNVNVGNDTLQIVUGAPNVEAGQK	SAOUHSC_01858	Phenylalanine--tRNA ligase beta subunit	no		no	2.42273	+	1.52527		0.56226		-0.404496		2.54451	2.30094	1.3956	1.65494	0.522437	0.602082	-0.375027	-0.433965
Q2G1C4_C315	Q2G1C4	GHEINVUTMQDIVQAFEMDLSTSWGK	tarJ'	Ribulose-5-phosphate reductase 2	no		no	4.08945	+							4.35565	3.82324
Q2FZV7_C354	Q2FZV7	GTVUSLGSHDGVGMVFGK	SAOUHSC_00878	NADH dehydrogenase-like protein SAOUHSC_00878	no		no	2.37313	+	1.18225		0.822414		-0.299479		2.50116	2.2451	1.03935	1.32516	0.774451	0.870377	-0.332626	-0.266333
Q2FZ17_C152	Q2FZ17	ELTUTEYQMSNGSILSAIK	SAOUHSC_01254	Uncharacterized protein	no		no	4.04617	+							4.24124	3.85111
Q2FZX4_C68	Q2FZX4	TATFMILGAVUTR	lipA	Lipoyl synthase	no	Functional site	no	3.18986	+	1.21403				-0.381075		3.32711	3.05261	1.14574	1.28232			-0.341117	-0.421032
Q2FVG0_C49	Q2FVG0	QIUNLFSPTSGELYFK	SAOUHSC_02754	ABC transporter, ATP-binding protein, putative	no		no	4.01779	+							4.12582	3.90977
Q2FXA3_C55	Q2FXA3	YSLFDITHQPELUAYVTHLPVDNYHTDAAILYK	hemE	Uroporphyrinogen decarboxylase	no		no	3.20123	+	1.56286		-0.216329		-0.532507		3.25462	3.14784	1.56111	1.56462	-0.219472	-0.213186	-0.462137	-0.602876
Q2G2C3_C38	Q2G2C3	VQLDNLTLPSUPLYEEVLDTQMFGLQK	SAOUHSC_01062	UPF0358 protein SAOUHSC_01062	no		no	4.01049	+							4.07528	3.9457
Q2FVQ5_C78	Q2FVQ5	DGTVDUSK	mqo	Probable malate:quinone oxidoreductase	no		no	3.55021	+	1.4305		0.050841		-1.03146		3.71129	3.38912	1.36102	1.49997	0.0794085	0.0222735	-0.988247	-1.07467
Q2FYG6_C136	Q2FYG6	VHQLISESIVDVUR	SAOUHSC_01486	Heptaprenyl diphosphate syntase component II, putative	no		no	2.73853	+	1.21072				0.0209856		2.59366	2.88339	1.03281	1.38863			-0.221304	0.263275
Q2G1X7_C33	Q2G1X7	TAGUDYR	queE	7-carboxy-7-deazaguanine synthase	no	Functional site	no	3.96137	+	0.32262		-0.321691				4.20312	3.71962	0.322505	0.322736	-0.251814	-0.391569
Q2FUT4_C107	Q2FUT4	LHPSFEGQGYAUEAITAITNFVNYIDQETVK	SAOUHSC_03017	Uncharacterized protein	no		no	3.83231	+			0.108924				3.77505	3.88957			-0.0726952	0.290542
Q2G0B0_C183	Q2G0B0	QLGMIUASIPTYK	SAOUHSC_00695	Uncharacterized protein	no		no	3.93201	+							3.65558	4.20844
Q2G1S4_C357	Q2G1S4	ELKUPVIALSQLSR	SAOUHSC_00018	Replicative DNA helicase	yes		no	3.65573	+			0.595212		-0.336666		3.84248	3.46897			0.607579	0.582845	-0.334462	-0.338871
Q2FZC7_C80	Q2FZC7	TTPVVWDMNULEEVCGACSMVINGR	SAOUHSC_01105	Iron-sulphur subunit of succinate dehydrogenase, putative	no		no	3.90617	+							4.16479	3.64754
Q2G1Z4_C439	Q2G1Z4	AQSLIMGUYGIGISR	proS	Proline--tRNA ligase	yes		no	2.29932	+	1.32138		0.647237		-0.37475		2.38918	2.20945	1.51309	1.12968	0.866868	0.427606	-0.130208	-0.619293
Q2FWK2_C298	Q2FWK2	NVANPFGMILSLAMULR	leuB	3-isopropylmalate dehydrogenase	no		no	2.04651	+	1.83687						2.05873	2.03429	2.29772	1.37601
Q2FY55_C52	Q2FY55	QDGTTLVMINSVUGCAGGIAR	SAOUHSC_01610	UPF0403 protein SAOUHSC_01610	no		no	3.87968	+							3.99032	3.76903
Q2FWL2_C302	Q2FWL2	LUTDNAAMIGVAGHYLYQQGR	tsaD	tRNA N6-adenosine threonylcarbamoyltransferase	yes	Functional site	no	3.85069	+							3.93659	3.76479
Q2FZL8_C369	Q2FZL8	AQATLFAGUGIVK	SAOUHSC_00982	Uncharacterized protein	no		no	2.08888	+	1.33569		0.577021		-0.158133		2.24524	1.93253	1.33084	1.34054	0.668032	0.48601	-0.09962	-0.216646
Q2FZ25_C191	Q2FZ25	LNIPIVGIVDTNUDPDEIDYVIPANDDAIR	rpsB	30S ribosomal protein S2	yes		no	2.01727	+	1.74273		0.529743		-0.453021		2.13044	1.9041	1.80469	1.68077	0.522608	0.536878	-0.525524	-0.380519
Q2G2W9_C77	Q2G2W9	IADDKDIDKFNUNER	SAOUHSC_00455	Uncharacterized protein	no		no	3.49841	+					0.321682		3.48813	3.50868					0.255561	0.387804
Q2G1G6_C272	Q2G1G6	VATVMGMUGISK	murQ	N-acetylmuramic acid 6-phosphate etherase	no		no	2.65232	+	1.12614						2.63844	2.66619	1.44015	0.812129
Q2FWP1_C155	Q2FWP1	SGUGFDNDSNK	hlb	Phospholipase C	no		no	4.34479	+	0.469329				-1.03736		4.46761	4.22197	0.48944	0.449218			-0.915609	-1.15911
Q2G0S2_C256	Q2G0S2	EVYACUTHPVLSGPAK	prs	Ribose-phosphate pyrophosphokinase	yes		no	2.20744	+	0.585508		1.0407		-0.119021		2.2806	2.13429	0.395502	0.775514	1.07772	1.00367	-0.214039	-0.024003
Q2FZC7_C238	Q2FZC7	LNALMGTGGLQQCGNSQNCVNAUPK	SAOUHSC_01105	Iron-sulphur subunit of succinate dehydrogenase, putative	no		yes			2.64772	+	0.97547		0.0903092				2.68113	2.61431	1.02191	0.929033	0.0877344	0.092884
Q2FZC7_C234	Q2FZC7	LNALMGTGGLQQCGNSQNUVNACPK	SAOUHSC_01105	Iron-sulphur subunit of succinate dehydrogenase, putative	no		no	3.75657	+					-0.072609		3.97435	3.53879					-0.238102	0.092884
Q2G2W9_C203	Q2G2W9	LMUCLKYENDYYEEVR	SAOUHSC_00455	Uncharacterized protein	no		no	3.676	+							3.80271	3.5493
Q2FUV4_C147	Q2FUV4	NEGVSESUHGGIK	SAOUHSC_02997	Uncharacterized protein	no		no	3.66705	+							3.8506	3.48349
Q2FYJ1_C276	Q2FYJ1	MSFATTLNHILSIUNEHELHVSGK	SAOUHSC_01454	Uncharacterized protein	no		no	3.64711	+							3.44692	3.8473
Q2G0N1_C473	Q2G0N1	EFNVEUNVGAPMVSYR	fusA	Elongation factor G	yes		no	2.51423	+	1.3648		0.066949		-0.323477		2.66885	2.35961	1.43912	1.29048	0.140812	-0.00691414	-0.226848	-0.420105
Q2G069_C224	Q2G069	QPLEYPSUGSVFQRPPGHFAGK	murB	UDP-N-acetylenolpyruvoylglucosamine reductase	yes	Functional site	no	2.38132	+	1.1098		0.650097		-0.524791		2.47738	2.28526	0.926409	1.29319	0.710525	0.589668	-0.493108	-0.556475
Q2FXN4_C117	Q2FXN4	QELDLFTULR	SAOUHSC_01801	Isocitrate dehydrogenase [NADP]	no		no	2.40698	+	1.45579		0.191024		-0.453698		2.28084	2.53312	1.55584	1.35573	0.217719	0.16433	-0.456759	-0.450636
Q2FUT8_C29	Q2FUT8	DIUQEVK	hisD	Histidinol dehydrogenase	no		no	2.32956	+	1.23228		0.504845		-0.490065		2.35583	2.30328	1.04523	1.41932	0.489646	0.520045	-0.526888	-0.453241
O06446_C775	O06446	DYQNEGHELFDIMMQNIEEDTUK	secA1	Protein translocase subunit SecA 1	yes		no	2.40501	+	1.04635		0.123788				2.37835	2.43168	1.13448	0.958213	0.388465	-0.140889
Q2FZZ6_C291	Q2FZZ6	STDLEAMKFDDYMYSWDUS	SAOUHSC_00838	Uncharacterized protein	no		no	3.57402	+							3.69098	3.45707
Q2G0L9_C109	Q2G0L9	GGUSGSLMNLLQQSNFNHR	tadA	tRNA-specific adenosine deaminase	no		no	3.55976	+							3.50407	3.61545
Q2FZJ1_C188	Q2FZJ1	GNVUGMMPHPER	purQ	Phosphoribosylformylglycinamidine synthase subunit PurQ	no	Functional site	no	2.22524	+	1.33419						2.37217	2.0783	1.3293	1.33908
Q2G1K4_C160	Q2G1K4	SEQTLIUGTR	SAOUHSC_00118	Capsular polysaccharide biosynthesis protein Cap5E, putative	no		no	3.53894	+							3.60656	3.47132
Q53727_C243	Q53727	NLUVVGDSDQSIYGWR	pcrA	ATP-dependent DNA helicase PcrA	yes		no	3.31803	+			0.205662				3.49685	3.13922			0.188148	0.223175
Q2FWE2_C131	Q2FWE2	LGYLURK	SAOUHSC_02357	Threonylcarbamoyl-AMP synthase	yes		no	3.51085	+							3.30273	3.71896
Q2G0D6_C190	Q2G0D6	DIYESMEEIADKUQIVANNFETIIMK	SAOUHSC_00669	Uncharacterized protein	no		no	3.08907	+	0.866848		-0.45035				3.20117	2.97696	0.957172	0.776525	-0.499483	-0.401216
Q2FZT1_C82	Q2FZT1	TUHEILDLGIAQNIIQGLQQYQVSNIIAEVK	SAOUHSC_00909	Uncharacterized protein	no		no	2.16551	+	1.30848		0.459445		-0.431696		2.25592	2.07509	1.22113	1.39583	0.443182	0.475707	-0.372673	-0.49072
Q2G268_C154	Q2G268	EDGYHFIEPGSGFLAUGYVAK	SAOUHSC_01178	Coenzyme A biosynthesis bifunctional protein CoaBC	yes		no	3.53558	+	1.09291		-0.544345		-0.605597		3.55287	3.51828	1.16275	1.02307	-0.50822	-0.580471	-0.585179	-0.626014
Q2G0G5_C123	Q2G0G5	VILVGGDUPK	SAOUHSC_00604	Uncharacterized protein	no		no	3.27537	+	0.943404		-0.0649394		-0.677445		3.3598	3.19093	0.929488	0.95732	-0.019726	-0.110153	-0.652516	-0.702374
Q2FWM2_C42	Q2FWM2	QIGGAPCNVAUTVQK	SAOUHSC_02267	Fructokinase, putative	no		yes			3.56533	+	0.45848		-0.578765				3.36247	3.76818	0.507921	0.409038	-0.671485	-0.486044
Q2FZL1_C30	Q2FZL1	MNNLDDUVNLTIGQPDFPMPDVVK	SAOUHSC_00989	Aminotransferase	no		no	3.42737	+							3.47087	3.38388
Q2G0Y9_C76	Q2G0Y9	ILTIEASGIAPAIMAALHFDVPULFAK	xpt	Xanthine phosphoribosyltransferase	no		no	3.22597	+	0.896469		-0.0180232		-0.677342		3.32639	3.12555	0.861558	0.93138	0.0301242	-0.0661706	-0.663511	-0.691173
Q2FZK7_C230	Q2FZK7	YKPQVNSSINDYIUK	atl	Bifunctional autolysin	no		no	3.36948	+	0.492567		0.113984		-0.557565		3.42546	3.31349	0.374622	0.610511	0.144177	0.083792	-0.492221	-0.62291
Q2G1H9_C1906	Q2G1H9	TITHIDUMPLTTNDKVDTTR	SAOUHSC_00144	Uncharacterized protein	no		no	3.41117	+							3.42962	3.39273
Q2FXT6_C150	Q2FXT6	SMQIQNDLGSDIMMAFDEUPPMPAEYDYVK	tgt	Queuine tRNA-ribosyltransferase	no	Functional site	no	3.40189	+							3.31467	3.48911
Q2FWG7_C213	Q2FWG7	QFFTEWNUHD	SAOUHSC_02324	Uncharacterized protein	no		no	3.40008	+							3.63935	3.16081
Q2G282_C145	Q2G282	MEIYGVCKEUQDK	perR	Peroxide-responsive repressor PerR	no	Functional site	no	2.42872	+	1.74672				-0.792536		2.388	2.46944	1.9568	1.53665			-1.15949	-0.425579
Q2FXH9_C466	Q2FXH9	KQLFNATSIYLEAIYSLUVEE	SAOUHSC_01868	Putative dipeptidase SAOUHSC_01868	no		yes			0.965448		2.39853	+					0.858379	1.07252	2.52035	2.27671
Q2G1B9_C38	Q2G1B9	PLYMSIUAADQR	tarJ	Ribulose-5-phosphate reductase 1	yes	Functional site	yes			2.29183	+	0.538584		0.484721				2.43555	2.14812	0.542109	0.535058	0.427928	0.541515
Q2FZZ2_C208	Q2FZZ2	IUDEVAVMESGK	metN2	Methionine import ATP-binding protein MetN 2	no		no	2.44384	+	0.860521						2.54957	2.33811	0.747608	0.973435
Q2G1Z8_C1254	Q2G1Z8	GLTEEMIETMKENEVPDWYLDSULK	polC	DNA polymerase III PolC-type	yes		no	3.30369	+							3.43603	3.17135
P0A0M9_C108	P0A0M9	DEGFYVATMNAQUHAIPFYESLNFK	SAOUHSC_00995	Putative acetyltransferase SAOUHSC_00995	no		no	3.27454	+							3.40177	3.14732
Q2G2H4_C177	Q2G2H4	PVLTGVNWLIQENELIUTATDSHR	SAOUHSC_00002	Beta sliding clamp	yes		no	2.3168	+	0.958229		0.317012		-0.32423		2.43763	2.19598	1.22823	0.688225	0.272143	0.361881	-0.165645	-0.482815
Q2FZW0_C217	Q2FZW0	IYNUDEPKDIDLVVWTAGIQPVEVVR	SAOUHSC_00875	Uncharacterized protein	no		no	3.24749	+							3.37072	3.12426
Q2G1S3_C179	Q2G1S3	GMFNETUPSFDDIFEEYYAAGQR	purA	Adenylosuccinate synthetase	no		no	2.80722	+	0.624542		-0.240594				2.91955	2.69488	0.701239	0.547845	-0.120216	-0.360972
Q2FY71_C19	Q2FY71	SGISLSELGLGUMSLGTDLK	SAOUHSC_01594	Uncharacterized protein	no		no	2.43927	+	0.87764		0.337695		-0.474422		2.54244	2.3361	0.777451	0.977829	0.494452	0.180937	-0.584999	-0.363846
Q2G2W9_C89	Q2G2W9	DAENALILUK	SAOUHSC_00455	Uncharacterized protein	no		no	2.70072	+			0.686943		-0.231124		2.72965	2.67178			0.78902	0.584866	0.0167816	-0.47903
Q2FVS1_C194	Q2FVS1	KSDUMFPEDTWK	SAOUHSC_02621	Putative 3-methyladenine DNA glycosylase	no		no	3.13847	+							3.11387	3.16306
Q2FVI3_C170	Q2FVI3	KUIYVQPHSYTIENQQQNK	SAOUHSC_02727	Uncharacterized protein	no		no	3.13426	+							3.26473	3.00378
Q2FUV7_C116	Q2FUV7	GAQHALNLLGLATLSLLDTFSUNKK	SAOUHSC_02994	Uncharacterized protein	no		no	3.11637	+							3.03182	3.20091
Q2G292_C129	Q2G292	VLNGUHLGGGLHHAQPGR	SAOUHSC_01849	Uncharacterized protein	no		no	3.11441	+							2.9617	3.26712
Q2FZ72_C1033	Q2FZ72	TTVENGIPULTSLDTANALTNVIESMTFTMR	carB	Carbamoyl-phosphate synthase large chain	no		no	2.61841	+	0.483348						2.76106	2.47577	0.291604	0.675093
Q2FWY3_C46	Q2FWY3	GTYDIUKPLTIYGNTTLLLDNETILR	SAOUHSC_02138	Uncharacterized protein	no		no	3.58017	+					-0.496247		3.65992	3.50042					-0.335299	-0.657195
Q2FYS9_C443	Q2FYS9	TGDIAIAAITSUTNTSNPYVMLGAGLVAK	SAOUHSC_01347	Aconitate hydratase	no		no	2.16556	+	1.21922		0.0798488		-0.38305		2.24285	2.08828	1.17836	1.26009	0.0989585	0.0607392	-0.382532	-0.383567
Q2FZC6_C184	Q2FZC6	NSESDTVILGUTHYPLLYKPIYDYFGGK	murI	Glutamate racemase	yes	Functional site	no	3.00453	+			0.362515		-0.319162		3.21009	2.79897			0.392421	0.332609	-0.333598	-0.304725
Q2FXW5_C341	Q2FXW5	KSPFDFUGLVLDYNEDTK	SAOUHSC_01716	Uncharacterized protein	no		no	2.09817	+	1.12776		0.34814		-0.53152		2.23398	1.96236	1.18808	1.06743	0.443501	0.252779	-0.471209	-0.591832
P0A0Q0_C222	P0A0Q0	VGKEDFTSFUQLNELTAVVMDYEDEEKVETIK	lacR	Lactose phosphotransferase system repressor	no		no	3.02138	+							3.05495	2.98781
Q2FZZ4_C31	Q2FZZ4	VQQVIAEPVNIIUTHGTMSIDKLDDMIESLYDK	SAOUHSC_00840	Uncharacterized protein	no		no	3.01445	+							3.2358	2.79311
Q2FYZ9_C87	Q2FYZ9	VAIUEQMEDPK	mutS	DNA mismatch repair protein MutS	no		no	2.46374	+			0.516673				2.46918	2.4583			0.903732	0.129613
Q2G067_C133	Q2G067	FIGLUNQSIK	SAOUHSC_00754	Uncharacterized protein	no		no	2.88081	+	0.484058		0.0434621		-0.465207		3.06774	2.69388	0.393965	0.57415	-0.0814611	0.168385	-0.524064	-0.40635
Q2FZC6_C143	Q2FZC6	INPHVEVHGVAUPGFVPLVEQMR	murI	Glutamate racemase	yes		no	2.94285	+							3.08782	2.79788
Q2FXR4_C143	Q2FXR4	FEGUYHGHSDSLLIK	hemL1	Glutamate-1-semialdehyde 2,1-aminomutase 1	no		no	2.59114	+	0.685279		0.0386516		-0.377469		2.73712	2.44516	0.610935	0.759623	0.0288939	0.0484093	-0.342431	-0.412506
Q2FXV6_C199	Q2FXV6	DSTGIUFIGEK	mnmA	tRNA-specific 2-thiouridylase MnmA	yes	Functional site	no	2.86225	+	1.55143		-0.295709		-1.23219		2.90859	2.8159	1.48586	1.617	-0.270889	-0.320529	-1.22313	-1.24126
Q2FY32_C136	Q2FY32	QLNDLYUSR	aroK	Shikimate kinase	no	Functional site	yes			2.13081	+	0.761498		-0.0703362				2.20833	2.05329	0.762476	0.760519	-0.106482	-0.0341899
Q2FXA5_C451	Q2FXA5	VTGASFEAVGLPDUITQGK	SAOUHSC_01960	Protoporphyrinogen oxidase	no		no	2.21789	+	0.620237		0.427927		-0.475136		2.36107	2.07471	0.371392	0.869082	0.528971	0.326882	-0.439794	-0.510478
Q93T05_C615	Q93T05	LREDVAIMMSUK	mutL	DNA mismatch repair protein MutL	no		no	2.78735	+							2.66034	2.91437
Q2G1K4_C121	Q2G1K4	VIULSTDK	SAOUHSC_00118	Capsular polysaccharide biosynthesis protein Cap5E, putative	no		no	2.69796	+							2.89128	2.50465
Q2G2S8_C955	Q2G2S8	SLSEHYQVLYFTUVK	SAOUHSC_01974	Uncharacterized protein	no		no	2.65654	+							2.80507	2.50802
Q2FWZ6_C155	Q2FWZ6	AUAMITFR	SAOUHSC_02110	Uncharacterized protein	no		no	2.64731	+							2.76564	2.52897
Q2G0S8_C196	Q2G0S8	MUYEALENR	SAOUHSC_00466	Putative 4-diphosphocytidyl-2-C-methyl-D-erythritol kinase	no		no	2.64452	+							2.4993	2.78975
Q2G293_C182	Q2G293	LMATGGLEIFATDDPEITSHPANULMAR	SAOUHSC_01847	Uncharacterized protein	no		no	2.61935	+							2.73062	2.50807
Q2FY04_C100	Q2FY04	ELUDDDMPVYMTNHK	SAOUHSC_01670	Cytidine deaminase	no		no	2.59625	+							2.48373	2.70878
Q2G1R8_C31	Q2G1R8	MMEEGKDUK	SAOUHSC_00034	Uncharacterized protein	no		no	2.58717	+							2.57517	2.59917
Q2G0S8_C147	Q2G0S8	TALUTGR	SAOUHSC_00466	Putative 4-diphosphocytidyl-2-C-methyl-D-erythritol kinase	no		no	2.23658	+	0.950763		0.15142		-0.772782		2.33296	2.14021	1.0106	0.890929	0.0375477	0.265292	-0.857511	-0.688053
Q2FZ14_C210	Q2FZ14	LVLPSEVAHTUAYLYHPNAR	SAOUHSC_01257	Uncharacterized protein	no		no	2.55615	+							2.42838	2.68392
Q2G0I1_C78	Q2G0I1	QAUDNFVSR	SAOUHSC_00584	Uncharacterized protein	no		no	2.72649	+			-0.175032				2.82603	2.62695			-0.238119	-0.111945
Q2G2V4_C30	Q2G2V4	FYPTUSEYTR	SAOUHSC_01914	Putative membrane protein insertion efficiency factor	no		no	2.2143	+	0.445922		0.138815		-0.260494		2.3427	2.0859	0.690462	0.201383	0.115033	0.162597	0.0629506	-0.583939
Q2FXY7_C383	Q2FXY7	EFGIELIATAPSVIYQUVLR	lepA	Elongation factor 4	no		no	2.54984	+	1.08281		-0.183353		-0.950665		2.67102	2.42865	1.21126	0.95435	-0.144858	-0.221848	-0.918033	-0.983297
Q2FWW9_C187	Q2FWW9	LEDIELIUDR	SAOUHSC_02152	ABC transporter, ATP-binding protein, putative	yes		no	2.30803	+	0.520015		0.116165		-0.468715		2.41339	2.20266	0.306009	0.734021	0.153347	0.0789834	-0.414904	-0.522525
O05154_C173	O05154	FAELQUDETLANTYNHAILVK	tagX	Putative glycosyltransferase TagX	no		no	2.62366	+	1.11791		-0.644832		-0.627518		2.69381	2.55351	1.00956	1.22626	-0.620268	-0.669396	-0.58775	-0.667286
Q2FZD3_C378	Q2FZD3	NVYUDIGDEQSIEQSLSTFSSHMTNIVEILK	mutS2	Endonuclease MutS2	no		no	2.42289	+							2.38869	2.4571
Q2G1T3_C120	Q2G1T3	YLQMAHEFUPYSK	SAOUHSC_00831	Organic hydroperoxide resistance protein-like	no		no	2.40932	+							2.52947	2.28917
Q2G1K6_C58	Q2G1K6	SULNHIESLEEVQALNLK	SAOUHSC_00116	Capsular polysaccharide synthesis enzyme Cap8C	no		no	2.40802	+							2.46913	2.3469
Q2G1J5_C159	Q2G1J5	VAIVRPPMIYGAHUPGNFQR	SAOUHSC_00127	Cap5N protein/UDP-glucose 4-epimerase, putative	no		no	2.40777	+							2.42978	2.38576
Q2G089_C246	Q2G089	QFMGSHLEDDAPUVEENAIIR	SAOUHSC_00731	ABC transporter domain protein	no		no	2.39059	+							2.52825	2.25293
Q2G089_C207	Q2G089	IULLNEGHIEQIDTPEGFK	SAOUHSC_00731	ABC transporter domain protein	no		no	2.77466	+					-0.403423		2.92654	2.62278					-0.271931	-0.534914
Q2G0J8_C110	Q2G0J8	AGEVYEASNAQYFVVDPVMVUK	SAOUHSC_00562	Phosphomethylpyrimidine kinase	no		no	2.36962	+							2.55343	2.1858
Q2G0G1_C145	Q2G0G1	VPEKLDPAAASSITUAGVTTYK	adh	Alcohol dehydrogenase	no	Functional site	yes			2.08778	+	0.686782		-0.40527				1.99751	2.17805	0.692159	0.681404	-0.404611	-0.405929
Q2FYZ9_C541	Q2FYZ9	IISELDULQSFAEIAQK	mutS	DNA mismatch repair protein MutS	no		no	2.37653	+	1.25646		-0.248641		-1.05516		2.53648	2.21658	1.32579	1.18713	-0.1435	-0.353782	-1.30194	-0.808387
Q2G1U8_C227	Q2G1U8	DKQGNAVFISHESIGYLADUYGFVQK	SAOUHSC_02690	Uncharacterized protein	no		no	2.32148	+							2.4479	2.19506
Q2FVT7_C193	Q2FVT7	GVGGHAAKPEQUNDPVIVLAQLINSIQSIVSR	SAOUHSC_02605	Uncharacterized protein	no		no	2.48031	+			0.237551		-0.408098		2.67123	2.28939			0.0539454	0.421156	-0.385356	-0.430839
Q2FY73_C140	Q2FY73	LTFHGVUETCQAK	SAOUHSC_01592	Transcriptional regulator, Fur, putative	yes		no	2.46267	+	1.06041		-0.319715		-0.898039		2.60274	2.32259	1.12473	0.996099	-0.207111	-0.432318	-0.855405	-0.940672
Q2FVS1_C142	Q2FVS1	AIDGATLNDUR	SAOUHSC_02621	Putative 3-methyladenine DNA glycosylase	no		no	2.24468	+			0.39873		-0.353491		2.19661	2.29275			0.335826	0.461633	-0.262642	-0.444341
Q2FXK3_C127	Q2FXK3	LITIADNNUMISNAVR	SAOUHSC_01831	Uncharacterized protein	no		no	2.28145	+							2.40411	2.15879
Q2FYK5_C201	Q2FYK5	HIVSAWNPTEIDTMALPPUHTMFQFYVQDGK	thyA	Thymidylate synthase	yes	Functional site	no	2.24567	+							2.27302	2.21831
Q2G274_C421	Q2G274	LADUSSK	gyrB	DNA gyrase subunit B	yes		no	2.66467	+	0.800188		-0.0610758		-1.17093		2.83805	2.4913	0.627906	0.97247	-0.0535849	-0.0685667	-1.06714	-1.27471
Q2FWK4_C199	Q2FWK4	AGVIETTFKEETETDLFGEQAVLUGGVSK	ilvC	Ketol-acid reductoisomerase (NADP(+))	no	Functional site	no	2.56247	+			0.145017		-0.475031		2.6854	2.43954			0.292546	-0.00251248	-0.416423	-0.533639
Q2G1F0_C228	Q2G1F0	EIYDAPNUIFVAQFIGSPAMNMLNATVEMDGLK	SAOUHSC_00175	Multiple sugar-binding transport ATP-binding protein, putative	no		no	2.23024	+							2.34832	2.11217
Q2FXY3_C73	Q2FXY3	LTMIQMIIDELGFGDIUDDEIKR	nadD	Probable nicotinate-nucleotide adenylyltransferase	yes		no	2.09044	+							2.13527	2.04562
Q2FXT4_C269	Q2FXT4	MMNUIIK	ruvB	Holliday junction ATP-dependent DNA helicase RuvB	yes		no	2.04007	+							1.90801	2.17214
Q2G0J7_C214	Q2G0J7	SPINWUESEA	ung	Uracil-DNA glycosylase	no		no	2.01624	+							1.96492	2.06757
Q2G2R6_C14	Q2G2R6	FKVNENETIADULSR	SAOUHSC_02130	Uncharacterized protein	no		no	2.03347	+	0.155593		0.49042		-0.693644		2.18758	1.87935	-0.0258966	0.337083	0.469573	0.511266	-0.693528	-0.693761
Q2FY27_C180	Q2FY27	FKCNUGR	SAOUHSC_01646	Glucokinase, putative	no		yes	1.25305		2.05949	+	-0.457401		-1.12504		1.40163	1.10447	1.96628	2.1527	-0.403523	-0.511279	-1.00101	-1.24907
Q2G081_C57	Q2G081	FNCPEFTSLUPITGQPDFATIYISYIPNVK	queF	NADPH-dependent 7-cyano-7-deazaguanine reductase	no	Functional site	yes			2.23565	+	-0.132399		-0.377975				2.20292	2.26837	-0.10479	-0.160008	-0.298318	-0.457633
Q2FZY3_C302	Q2FZY3	YPNUVLLGEGAK	SAOUHSC_00851	UPF0051 protein SAOUHSC_00851	yes		no	2.06381	+	0.171472		-0.266222		-0.283074		2.20543	1.92218	0.0304403	0.312504	-0.257705	-0.27474	-0.302185	-0.263962
Q2FZD2_C29	Q2FZD2	VESGVQLVDFWATWUGPCK	trxA	Thioredoxin	yes		no	2.46801	+	1.5206		-0.665359		-1.66589		2.41524	2.52077	1.34716	1.69404	-0.603883	-0.726835	-1.64673	-1.68505
P95689_C102	P95689	MTGILUR	serS	Serine--tRNA ligase	yes		no	2.13491	+	1.02976		-0.420857		-1.24686		2.26805	2.00177	0.78266	1.27685	-0.458862	-0.382852	-1.12117	-1.37254
Q93T05_C646	Q93T05	EAEDPFTUPHGRPIIINFSK	mutL	DNA mismatch repair protein MutL	no		no	2.33056	+					-1.00901		2.28596	2.37516					-0.310057	-1.70797
Q2FXQ7_C13	Q2FXQ7	FKFNEDEENLKUSFCGK	clpX	ATP-dependent Clp protease ATP-binding subunit ClpX	no		no	2.13659	+			-0.195073		-0.856305		2.16015	2.11303			-0.43335	0.0432045	-0.768993	-0.943617
Q2FXI8_C167	Q2FXI8	GVASSGMIUSMK	SAOUHSC_01858	Phenylalanine--tRNA ligase beta subunit	no		no	2.0916	+	-2.26133						2.22452	1.95868	-1.78493	-2.73774
Q2G274_C429	Q2G274	SPEEUEIFLVEGDSAGGSTK	gyrB	DNA gyrase subunit B	yes		no	2.15977	+	0.456795		-0.849826		-2.12091		2.30276	2.01678	0.345169	0.568421	-0.784972	-0.91468	-1.97262	-2.2692
Q2G0I3_C25	Q2G0I3	FNSSSLAELTULNPVQLR	SAOUHSC_00582	Uncharacterized protein	no		no	2.65403	+	0.193484		-1.38685		-1.87159		2.62326	2.6848	0.0253123	0.361656	-1.29612	-1.47758	-1.91409	-1.8291
Q2FZH4_C12	Q2FZH4	SEIIVYTQNDUPPCTFVK	SAOUHSC_01030	Uncharacterized protein	no		yes			2.06906	+	-1.49785		-2.07481				2.19532	1.9428	-1.4024	-1.59331	-1.74227	-2.40736
Q2FYZ0_C36	Q2FYZ0	GDVMLIVNTASEUGFTSQFEGLQSLYEK	SAOUHSC_01282	Glutathione peroxidase	no	Functional site	no	2.6459	+	-0.519891		-1.57493		-2.62245		2.691	2.6008	-0.543682	-0.496099	-1.38627	-1.76359	-2.60512	-2.63978
Q2FZZ9_C10	Q2FZZ9	NUTTCKK	SAOUHSC_00835	Uncharacterized protein	no		no	2.69298	+	0.0941534		-2.543		-3.06016		2.83287	2.55309	0.211137	-0.02283	-2.39828	-2.68771	-2.98564	-3.13467
Q2FZZ9_C13	Q2FZZ9	NCTTUKK	SAOUHSC_00835	Uncharacterized protein	no		no	2.69298	+	-2.23458		-3.63407				2.83287	2.55309	-2.54962	-1.91953	-3.79356	-3.47459
Q2FYK4_C144	Q2FYK4	DAFDENUK	SAOUHSC_01436	UPF0403 protein SAOUHSC_01436	no		no	2.00346	+	-0.777967		-1.96114		-2.94893		2.12619	1.88073	-0.962154	-0.593779	-1.91466	-2.00761	-2.90912	-2.98873
Q2G1I7_C143	Q2G1I7	CIULYNAPDEEAVR	SAOUHSC_00135	Uncharacterized protein	no		no			2.25452		2.32594		2.89621		2.01111		2.037	2.47205	2.55508	2.0968	3.13847	2.65395
A0A0H3KE27_C28	A0A0H3KE27	KUEKYTDEVIR	rsbU	sigma factor sigB regulation protein	no		no	4.86308		1.58093		0.665008		-0.0681374		5.29013	4.43603	1.44334	1.71853	0.72718	0.602837	-0.277184	0.14091
Q2G097_C26	Q2G097	IKUSSER	SAOUHSC_00724	Chorismate binding enzyme, putative	no		no	3.67921				1.84568		1.34697		4.26574	3.09268			1.67179	2.01956	1.45796	1.23597
Q2G124_C378	Q2G124	VLVTLLHQLNDEVETGLTSLUIGGGQAIAAVVSK	SAOUHSC_00336	Probable acetyl-CoA acyltransferase	yes	Functional site	no	1.251		3.19391		1.46104		0.166066		1.39177	1.11023	2.93023	3.45759	1.4918	1.43029	0.215368	0.116764
Q2FXG1_C267	Q2FXG1	CDUGAQLESSMK	ribBA	Riboflavin biosynthesis protein RibBA	no	Functional site	no			3.71855		1.53126		0.740394				3.38598	4.05111	1.35862	1.7039	0.153676	1.32711
Q2FVT8_C35	Q2FVT8	QEQEVPGLQSEMTPAPDUGETSYQGHQR	SAOUHSC_02604	Uncharacterized protein	no		no	2.49629		1.93029		1.24603		0.296148		2.73808	2.25451	1.85823	2.00235	1.31889	1.17316	0.370653	0.221643
Q2FWD1_C382	Q2FWD1	ENNVPFFGIULGMQLATVEFSR	pyrG	CTP synthase	yes	Functional site	no	2.28139		1.8091		0.797343		0.937814		2.64002	1.92277	1.75847	1.85973	0.794853	0.799833	0.930245	0.945383
Q2FXZ2_C15	Q2FXZ2	IIGIDLGTTNSUVTVLEGDEPK	dnaK	Chaperone protein DnaK	yes		no	2.47773		1.51441		1.07013		0.599334		2.7608	2.19466	1.35269	1.67613	1.07975	1.0605	0.659622	0.539045
Q2FZR9_C165	Q2FZR9	GPNGATVTAUATGTNSIGEAFK	SAOUHSC_00921	3-oxoacyl-[acyl-carrier-protein] synthase 2	yes	Functional site	no	3.41166		0.44994		1.11391		0.283008		3.96486	2.85846	0.279293	0.620586	1.08651	1.1413	0.25882	0.307195
Q2G242_C260	Q2G242	VUHVHGIK	SAOUHSC_00508	Uncharacterized protein	no		no	2.93138		2.15538		0.364711		-0.260915		3.24096	2.62181	1.83762	2.47314	0.638027	0.0913952	-0.467693	-0.0541376
Q2FXF5_C89	Q2FXF5	NSNLVVTLCSDADVNUPSLPTNVK	arsC	Arsenate reductase	no	Functional site	no			3.34033		1.67785		0.135438				2.96203	3.71864	1.71928	1.63642	0.0587114	0.212165
Q2FY19_C106	Q2FY19	VIDYUPIDQIK	fur	Ferric uptake regulation protein	no	Functional site	no	1.98469		1.48794		1.23827		0.343795		2.16806	1.80132	1.40212	1.57376	1.19043	1.28611	0.362778	0.324811
Q2G1N2_C259	Q2G1N2	VVVDDWSQUNR	SAOUHSC_00076	Ornithine cyclodeaminase, putative	no		no	3.6462				1.02741		0.208781		3.34483	3.94757			1.07553	0.979294	0.378845	0.0387171
Q2G2W8_C82	Q2G2W8	DNLAILYGEGFHIUK	SAOUHSC_00456	Initiation-control protein YabA	no		no	1.05967		2.95758		1.38188		-0.538499		1.44841	0.670929	2.69475	3.22041	1.37562	1.38813	-0.548418	-0.528579
Q2FY04_C89	Q2FY04	ASLVSAISQGYRPGDFESITVTVDADKPSSPUGACR	SAOUHSC_01670	Cytidine deaminase	no		no	1.65694		2.33506		0.763069				2.31504	0.998845	1.99632	2.67381	0.644318	0.881821
Q2FV20_C206	Q2FV20	QLLLDGUR	SAOUHSC_02920	2-dehydropantoate 2-reductase	no		no	2.32187		1.7234		0.818654		-0.154904		1.76541	2.87833	1.60673	1.84008	0.968644	0.668664	-0.0372659	-0.272541
Q2FZC6_C72	Q2FZC6	MLVIAUNTATAVALEYLQK	murI	Glutamate racemase	yes	Functional site	no	3.10806		1.7382		0.308999		-0.451067		3.42492	2.79119	1.91158	1.56482	0.376402	0.241596	-0.325937	-0.576196
Q2FVN9_C139	Q2FVN9	KUANEEER	SAOUHSC_02663	Uncharacterized protein	no		no	2.0424				1.42162		1.15781		2.24126	1.84354			1.48063	1.36261	1.18206	1.13356
Q2G0M6_C394	Q2G0M6	SVLSDSNLTGUIFGLTLQTK	araB	Ribulokinase	no		no	1.76185		1.66149		0.96783				1.80591	1.71778	1.19415	2.12882	1.14281	0.792855
Q2FZ17_C141	Q2FZ17	TADGEPVVYULDK	SAOUHSC_01254	Uncharacterized protein	no		no	2.15761		1.54659		1.00785		-0.377205		2.58532	1.7299	1.42943	1.66375	0.970265	1.04544	-0.470849	-0.283562
Q2FV14_C446	Q2FV14	EUAVVAK	SAOUHSC_02929	Acetyl-CoA synthetase, putative	no		no	1.32656		1.82323		1.09872		0.0602793		1.43649	1.21663	1.70876	1.93769	1.08172	1.11572	0.0537864	0.0667723
Q2G1Z3_C40	Q2G1Z3	VTSIIGPNGUGK	SAOUHSC_00652	Iron compound ABC transporter, ATP-binding protein	no	Functional site	no	4.25916								3.8498	4.66852
Q2FY46_C123	Q2FY46	LTEEGUFDK	xseA	Exodeoxyribonuclease 7 large subunit	no		no	1.99346		1.57409		0.821672		-0.178764		2.08093	1.906	1.46985	1.67834	0.629846	1.0135	-0.174369	-0.183158
Q2FWD2_C29	Q2FWD2	QSLEIQMAAQULIQAIGGEGYVYVK	SAOUHSC_02367	Uncharacterized protein	no		no	1.69614		1.53458		1.12755		-0.161234		1.78333	1.60895	1.62279	1.44636	1.10943	1.14568	-0.209228	-0.113239
Q2FWY9_C186	Q2FWY9	QPAAYUGVVGMK	gatA	Glutamyl-tRNA(Gln) amidotransferase subunit A	yes		no	2.04239		1.53732		0.887672		-0.288369		2.27166	1.81313	1.32815	1.74648	0.882447	0.892896	-0.26913	-0.307609
Q2FV75_C78	Q2FV75	GDNPEITIPLKPTGSHFQQUVWNELR	SAOUHSC_02861	Methylated-DNA--protein-cysteine methyltransferase	no		no	2.44814		1.72434						2.69704	2.19925	1.6564	1.79227
Q2FY04_C54	Q2FY04	TFYGTNVENASYPLSIUAER	SAOUHSC_01670	Cytidine deaminase	no		no	1.96196		1.10872		0.851153		0.0700064		2.13077	1.79315	1.03787	1.17957	0.839557	0.862749	0.00460925	0.135404
Q53726_C121	Q53726	TYGHSIDFEEVIFEGYVVUNADSK	pcrB	Heptaprenylglyceryl phosphate synthase	no		no	1.22493		1.71836		0.85069		0.165313		1.29101	1.15885	1.55439	1.88233	0.824971	0.876409	0.064469	0.266157
O05204_C127	O05204	LEGSFHFETFISLTUQK	ahpF	Alkyl hydroperoxide reductase subunit F	no		no	1.97577						1.95864		2.07252	1.87901		2.28904	2.77124		2.54523	1.37206
Q2G1K9_C844	Q2G1K9	MAELAFEDQUTTANPK	SAOUHSC_00113	Aldehyde-alcohol dehydrogenase	no		no	3.92959								4.61689	3.2423
Q2FXU4_C208	Q2FXU4	ILDUKVDR	hisS	Histidine--tRNA ligase	yes		no	1.73589		1.32667		0.769695		0.0960237		1.9978	1.47398	1.17718	1.47616	0.765722	0.773668	0.152224	0.0398239
Q2FYV3_C82	Q2FYV3	IVIUASTGNTSASAAAYAAR	SAOUHSC_01321	Threonine synthase	no	Functional site	no	0.982447		1.80075		0.54533		0.529106		1.17696	0.787934	1.57739	2.02411	0.482229	0.608431	0.547351	0.510861
Q2G0T5_C190	Q2G0T5	FVADAQQIEUEDEALAFIAK	dnaX	DNA polymerase III subunit gamma/tau	yes		no	2.20004		1.57607		0.4938		-0.435555		2.61854	1.78153	1.52271	1.62943	0.512051	0.475549	-0.312677	-0.558433
Q2G122_C715	Q2G122	SLFWVNPDUGLK	metE	5-methyltetrahydropteroyltriglutamate--homocysteine methyltransferase	no	Functional site	no	1.93276		1.7533		0.32431		-0.186215		2.14476	1.72076	1.66757	1.83903	0.341075	0.307545	-0.313656	-0.0587735
Q2FZ66_C120	Q2FZ66	HDYGNSVUVTTQVGCR	rlmN	Probable dual-specificity RNA methyltransferase RlmN	no		no			2.18809		1.27941		0.326646				2.92353	1.45265	1.43012	1.12869	0.388575	0.264717
Q2G2J8_C57	Q2G2J8	LAETLSEVVDTPMHQVNUSVDLDTESLLGFK	SAOUHSC_01413	Uncharacterized protein SAOUHSC_01413	no		no	2.23033		1.55793						2.50248	1.95817	1.65942	1.45644
Q2FWY9_C91	Q2FWY9	DNIITNGLETTUASK	gatA	Glutamyl-tRNA(Gln) amidotransferase subunit A	yes		no	1.86386		1.25215		0.644993		-0.0607908		1.97016	1.75755	1.10015	1.40416	0.775893	0.514093	0.0172093	-0.138791
Q2FVV9_C63	Q2FVV9	SUSTVIDRPMTVNTVNNDVK	SAOUHSC_02582	Putative formate dehydrogenase SAOUHSC_02582	no	Functional site	no	1.61509		2.04101						1.57168	1.65851	2.22666	1.85535
Q2FXM9_C8	Q2FXM9	IVUTIGPASESEEMIEK	pyk	Pyruvate kinase	yes		no	1.92088		1.38634		0.97873		-0.666218		2.05368	1.78808	1.25305	1.51963	1.03926	0.918203	-0.685099	-0.647338
Q2FXJ0_C152	Q2FXJ0	TSFLIGDGTGMGLPESDYFAFEAUEYR	murC	UDP-N-acetylmuramate--L-alanine ligase	yes		no	3.31556		0.283799		-0.0086234				3.73837	2.89275	0.287472	0.280125	0.068602	-0.0858488
Q2G238_C275	Q2G238	AFQQAVAUGTATAFDEDLATR	SAOUHSC_00707	Tagatose-6-phosphate kinase	no		no	1.80951		1.00349		0.552225		0.200988		1.95181	1.66721	0.937344	1.06963	0.555816	0.548634	0.228849	0.173127
Q2FVQ0_C188	Q2FVQ0	KPLASSTWQAUVDPVGGEGINYVTK	SAOUHSC_02652	Uncharacterized protein	no		no	3.5658								3.87036	3.26123
Q2G295_C216	Q2G295	NGLQLGDTLNUSGAESYK	SAOUHSC_01850	Catabolite control protein A	no		no	2.23922		1.10757		0.461438		-0.249827		2.50539	1.97305	1.09329	1.12184	0.445303	0.477574	-0.134405	-0.365248
Q2FZX3_C77	Q2FZX3	FSNIQDYIFEYUNFGCPYFVLR	SAOUHSC_00862	Uncharacterized protein	no		no	1.51254		1.74661		0.652371		-0.421111		1.74537	1.27971	2.0251	1.46811	0.614192	0.690551	-0.487278	-0.354944
Q7X2S2_C78	Q7X2S2	SNSDTTPAMPLDTUGAMSQGMIGYWLETEINR	arcC2	Carbamate kinase 2	no		no	3.47184								4.16148	2.7822
Q2FWY1_C110	Q2FWY1	IANFETAGPLUYR	ppaC	Probable manganese-dependent inorganic pyrophosphatase	yes		no	1.84605		1.5066		0.321684		-0.208529		2.02949	1.66262	1.47035	1.54285	0.366812	0.276556	-0.144744	-0.272315
Q2FZ02_C230	Q2FZ02	FCTYUIVPFTR	miaB	tRNA-2-methylthio-N(6)-dimethylallyladenosine synthase	no	Functional site	no			2.27715		1.18605						1.70664	2.84766	1.3364	1.03569
Q2FZC7_C55	Q2FZC7	ENLNVIAULMEIR	SAOUHSC_01105	Iron-sulphur subunit of succinate dehydrogenase, putative	no		no	1.49844		1.29928		0.773041		-0.110518		1.47742	1.51945	1.06387	1.53468	0.746829	0.799253	-0.0824995	-0.138537
Q2G1C8_C143	Q2G1C8	TUFALTEPEHGSDVAGGLETVAER	SAOUHSC_00197	Uncharacterized protein	no		no	1.46687		1.41738		0.758075		-0.184439		1.64071	1.29302	1.19465	1.64011	0.745194	0.770956	-0.170897	-0.197981
Q2G292_C147	Q2G292	ASGFUIYNDIAITAQYLAK	SAOUHSC_01849	Uncharacterized protein	no		no	3.44348								3.91409	2.97288
Q2FYS0_C275	Q2FYS0	SHLVNLUK	SAOUHSC_01365	Uncharacterized protein	no		no	1.67431		1.0338		0.797291		-0.0622687		1.69933	1.64929	0.794686	1.27292	1.05158	0.543001	0.0863762	-0.210913
Q2FXL6_C137	Q2FXL6	HAPUDVLVVR	SAOUHSC_01819	Putative universal stress protein SAOUHSC_01819	no		no	1.9409		1.59486		0.321544		-0.452247		2.08076	1.80103	1.53277	1.65695	0.30249	0.340598	-0.562923	-0.341572
Q2FXW5_C118	Q2FXW5	TGATGIIVADPLIIETUK	SAOUHSC_01716	Uncharacterized protein	no		no	2.64445				0.956808		-0.218404		1.79077	3.49812			0.865875	1.04774	-0.177798	-0.259011
Q2FXI5_C187	Q2FXI5	YGUVLAIEILELLK	SAOUHSC_01861	Uncharacterized protein	no	Functional site	no	1.18187		1.39605		1.10052		-0.347603		1.20852	1.15523	1.40534	1.38676	1.33868	0.862352	-0.414941	-0.280265
Q2FYF3_C14	Q2FYF3	VESIIIGGGPUGLSAAIEQK	SAOUHSC_01499	Uncharacterized protein	no		no	0.636939		1.48794		0.992257		0.188847		0.785603	0.488275	1.34656	1.62933	0.984121	1.00039	0.155879	0.221815
Q2G0U3_C264	Q2G0U3	TIUAITKEPYTK	SAOUHSC_00434	Transcriptional regulator, lysR family, putative	no		no	2.25239		1.13212		-0.0812809				2.01685	2.48792	1.04187	1.22237	0.143655	-0.306216
Q2FZ02_C227	Q2FZ02	FUTYCIVPFTR	miaB	tRNA-2-methylthio-N(6)-dimethylallyladenosine synthase	no	Functional site	no	3.2826								3.58832	2.97688
Q2G203_C37	Q2G203	IEIYSFFDPFSSDUFK	SAOUHSC_00938	UPF0413 protein SAOUHSC_00938	no		no	2.65824		1.29878		0.00633255		-0.683109		2.25254	3.06395	1.4828	1.11477	0.0784732	-0.0658081	-0.614558	-0.751659
Q2FY53_C111	Q2FY53	SNNDWQUPLTIR	SAOUHSC_01612	2-oxoisovalerate dehydrogenase, E1 component, beta subunit, putative	no		no	1.06508		1.04111		0.812773		0.360982		1.00225	1.12791	0.665211	1.417	0.774587	0.850959	0.280481	0.441483
Q2G0P6_C157	Q2G0P6	SLDISYDEQLGYLTTUPTNIGTGMR	mcsB	Protein-arginine kinase	no		no	3.27843								3.57543	2.98143
Q2FY34_C330	Q2FY34	ATSNIUSNQALNALASSIAMSALGK	gcvPA	Probable glycine dehydrogenase (decarboxylating) subunit 1	no		no	1.482		1.28882		0.868418		-0.367846		1.62663	1.33737	1.28333	1.29431	0.889419	0.847416	-0.34485	-0.390842
Q2FXZ6_C47	Q2FXZ6	VDFEANADVFVINTUTVTNTGDKK	SAOUHSC_01679	Uncharacterized protein	no		no	1.46126		1.71529						1.44308	1.47944	1.57211	1.85846
Q2FZ02_C147	Q2FZ02	ERPDILIGVCGUMSQEESVVNK	miaB	tRNA-2-methylthio-N(6)-dimethylallyladenosine synthase	no	Functional site	no	1.33		1.83437						1.44228	1.21773	1.8337	1.83503
Q2FYJ0_C1074	Q2FYJ0	DIHESIUQSTLGLLQPQMGLLR	SAOUHSC_01455	Uncharacterized protein	no		no	1.79205		1.30479		0.0650979				1.96107	1.62302	1.28534	1.32423	0.292075	-0.161879
Q2FY73_C103	Q2FY73	HFHHHLVCMEUGR	SAOUHSC_01592	Transcriptional regulator, Fur, putative	yes		no	3.15362								2.83958	3.46767
Q2FV20_C110	Q2FV20	NVUQAVVYISGQK	SAOUHSC_02920	2-dehydropantoate 2-reductase	no		no	1.77105		1.2947		0.423968		-0.345846		2.11247	1.42964	1.19956	1.38984	0.537246	0.310689	-0.405967	-0.285724
Q2G1D8_C654	Q2G1D8	IPYDCUK	pflB	Formate acetyltransferase	no		no	1.53701		1.78782				-0.195798		1.12168	1.95233	1.36121	2.21444			-0.196426	-0.19517
Q2FVG3_C347	Q2FVG3	QQSLAITHUYFK	SAOUHSC_02751	Carboxylic ester hydrolase	no		no	2.08909		0.609902				0.424406		2.45887	1.71931	-0.134366	1.35417			0.392427	0.456386
Q2G243_C378	Q2G243	AVDGLDUYIGEVGLTGEVR	radA	DNA repair protein RadA	no		no	3.10463								3.77915	2.4301
Q2FZJ0_C724	Q2FZJ0	QIWEGAIAQULTTQD	purL	Phosphoribosylformylglycinamidine synthase subunit PurL	no		no	0.470016		1.76687		0.845269				0.50782	0.432211	1.67541	1.85834	0.88096	0.809579
Q2G1D0_C379	Q2G1D0	YGMVTMUIGVGMGAAAIFEYVR	SAOUHSC_00195	Acetyl-CoA acetyltransferase, putative	no	Functional site	no	1.18527		1.82796				0.0687718		1.29913	1.07142	1.85204	1.80389			0.162339	-0.0247954
Q2G0K8_C239	Q2G0K8	HPNVEIYLDDEAUPK	nagB	Glucosamine-6-phosphate deaminase	no		no	1.02584		1.07613		0.837858		0.105399		1.19528	0.856388	1.10702	1.04523	0.780646	0.89507	0.224905	-0.0141062
Q2G2P8_C147	Q2G2P8	LKPQLPTUR	nnrD	ADP-dependent (S)-NAD(P)H-hydrate dehydratase	no		no	0.721479		0.741938		1.12547		0.451448		0.984261	0.458697	0.537445	0.946431	1.05603	1.19491	0.44074	0.462157
P0A011_C107	P0A011	LPDULVEWSAK	lacD	Tagatose 1,6-diphosphate aldolase	no		no	0.85809		1.76092		0.720622		-0.306855		0.83875	0.87743	1.65549	1.86635	0.584531	0.856714	-0.331518	-0.282193
Q2G2A1_C88	Q2G2A1	QGVSTEGATIYVTHFPULNCTK	SAOUHSC_01692	Uncharacterized protein	no	Functional site	no	0.618917		1.86322		0.541745				0.769095	0.46874	1.7891	1.93734	0.471656	0.611833
Q2FYZ0_C64	Q2FYZ0	DQGFVILGFPUNQFGGQEPGSGEEAAQNCK	SAOUHSC_01282	Glutathione peroxidase	no		no	1.48334		1.35373		0.324329		-0.141747		1.71267	1.25401	1.28978	1.41768	0.391016	0.257643	-0.100679	-0.182814
Q2FY59_C60	Q2FY59	LGANNLVUTMNSTIEEGEVPK	SAOUHSC_01606	Peptidase T, putative	no		no	1.93166		1.08045						2.11726	1.74605	1.15342	1.00748
Q2FVF9_C185	Q2FVF9	YGUALAIEVLK	SAOUHSC_02755	Uncharacterized protein	no	Functional site	no	2.27395		0.615829		0.390474		-0.289784		2.62922	1.91867	0.992261	0.239398	0.222681	0.558268	-0.325124	-0.254444
Q2G282_C105	Q2G282	FDFNTHNHYHIICEQUGK	perR	Peroxide-responsive repressor PerR	no	Functional site	no	2.97957								3.55373	2.40542
Q2FXM9_C266	Q2FXM9	QUNKLGKPVITATQMLDSMQR	pyk	Pyruvate kinase	yes		no	2.97248								2.41752	3.52745
Q2G2L1_C112	Q2G2L1	MLUMGFK	tagH	Teichoic acids export ATP-binding protein TagH	yes		no	2.95682								2.64164	3.272
Q2FUU3_C9	Q2FUU3	IIPULDVK	hisF	Histidine biosynthesis bifunctional protein HisIE	no	Functional site	no	1.98825		0.743		0.559056		-0.33856		2.27393	1.70257	0.637842	0.848157	0.730749	0.387363	-0.36201	-0.315109
Q2FXI5_C238	Q2FXI5	ASAEMIDPDVAFVVDUSPANDVK	SAOUHSC_01861	Uncharacterized protein	no	Functional site	no	2.91165								3.41913	2.40417
Q2FZR9_C220	Q2FZR9	ALSTNDDIETAUR	SAOUHSC_00921	3-oxoacyl-[acyl-carrier-protein] synthase 2	yes		no	1.84296		0.0812945		1.06997		-0.0918821		2.03919	1.64673	-0.144839	0.307429	1.1137	1.02623	-0.0406304	-0.143134
Q2FXI5_C345	Q2FXI5	SLLSEAIUNLDNNQIETLQYK	SAOUHSC_01861	Uncharacterized protein	no		no	2.38355		0.925956		0.344928		-0.759682		2.58698	2.18012	0.887993	0.963918	0.351289	0.338567	-0.721801	-0.797563
Q2FYZ9_C589	Q2FYZ9	VMDYNDYVPNNURLDNETFIYLITGPNMSGK	mutS	DNA mismatch repair protein MutS	no		no	2.86541								3.12819	2.60262
Q2FW49_C179	Q2FW49	AISLUQK	SAOUHSC_02468	Acetolactate synthase, putative	no		no	2.38954		0.174717				0.299493		2.68338	2.09569	0.0729976	0.276437			0.371615	0.227371
Q2FYG1_C320	Q2FYG1	EUVKDLMER	gpsA	Glycerol-3-phosphate dehydrogenase [NAD(P)+]	no		no	2.57348		1.06466		-0.035262		-0.743573		2.78627	2.3607	0.424277	1.70505	-0.0367182	-0.0338058	-0.82105	-0.666095
Q53727_C92	Q53727	LVGDQAEVIWMSTFHSMUVR	pcrA	ATP-dependent DNA helicase PcrA	yes		no	1.68072		1.146						1.85993	1.50152	1.39654	0.895458
Q2G1Y9_C9	Q2G1Y9	QVQCIIUDAK	SAOUHSC_01060	Uncharacterized protein	no		no	3.21267						-0.420284		3.65088	2.77446					-0.521018	-0.31955
Q2FXF5_C15	Q2FXF5	TIYFICTGNSUR	arsC	Arsenate reductase	no	Functional site	no			1.55854		1.21891						1.38078	1.7363	0.966209	1.4716
Q2FUX5_C58	Q2FUX5	VPIDUETWIYK	argR	Arginine repressor	no		no	2.75258								2.26057	3.2446
Q2FX96_C289	Q2FX96	ALQEUINNVK	SAOUHSC_01981	Sensor histidine kinase, putative	no		no	1.92098		1.53698		-0.198705		-0.537309		2.10605	1.73591	1.43365	1.6403	-0.0628214	-0.334589	-0.522716	-0.551903
Q2FVV7_C14	Q2FVV7	LIUSWLK	SAOUHSC_02584	Uncharacterized protein	no		no	2.21653		0.68939		0.230457		-0.434007		2.51337	1.9197	0.621991	0.75679	0.3359	0.125013	-0.356168	-0.511845
Q2G1K9_C431	Q2G1K9	VLVNTPSAVGGIGDMYNELIPSLTLGUGSYGR	SAOUHSC_00113	Aldehyde-alcohol dehydrogenase	no		no	2.69822								3.35657	2.03988
Q2G115_C101	Q2G115	EVDAIUQVVR	ychF	Ribosome-binding ATPase YchF	no		no	1.54032		1.40399		0.126161		-0.37632		1.63143	1.44922	1.49421	1.31377	0.207018	0.0453032	-0.351387	-0.401254
Q2FZX4_C272	Q2FZX4	HUQAGPLVR	lipA	Lipoyl synthase	no		no	1.47111		1.08976		0.536361		-0.403404		1.6544	1.28782	0.853009	1.32651	0.574343	0.498379	-0.404873	-0.401935
Q2FV10_C289	Q2FV10	NPNIIFDDADFELAVDQALNGGYFHAGQVUSAGSR	SAOUHSC_02933	Betaine aldehyde dehydrogenase	no		no	1.11587		0.916042		0.635003		0.0269025		1.82574	0.405992	0.783499	1.04858	0.81836	0.451646	0.15069	-0.0968846
Q2FZI8_C88	Q2FZI8	HDSIGIDAVAMUVNDILTTGAEPLYFLDYIATNK	purM	Phosphoribosylformylglycinamidine cyclo-ligase	no		no	2.6876								2.92585	2.44935
Q2FZX3_C81	Q2FZX3	FSNIQDYIFEYCNFGUPYFVLR	SAOUHSC_00862	Uncharacterized protein	no		no	2.67147								2.91831	2.42463
Q2G1J0_C290	Q2G1J0	SANIILDDANLDLAVEGIQLGILFNQGEVUSAGSR	aldA	Putative aldehyde dehydrogenase AldA	no	Functional site	no	1.52893		1.22827		0.102908		-0.190961		1.62059	1.43728	1.2052	1.25133	0.14965	0.0561673	-0.142576	-0.239345
Q2FYH2_C229	Q2FYH2	ELMYTTGULEIEHGDANEGVLLLK	SAOUHSC_01480	Uncharacterized protein	no		no	1.28332		0.738006		0.582944				1.40534	1.16131	0.614851	0.861161	0.659285	0.506602
O07325_C203	O07325	ELGAUVIDIGEDVTQVAFYER	ftsA	Cell division protein FtsA	yes		no	1.79019		0.886547		0.301795		-0.378505		1.75835	1.82204	0.77989	0.993203	0.277628	0.325962	-0.306787	-0.450222
Q2G2L2_C236	Q2G2L2	LNETFMSSTDUSDPSQR	SAOUHSC_00637	Uncharacterized protein	no		no			1.76148		0.706823		0.129632				1.73669	1.78626	0.648281	0.765365	0.189287	0.0699771
Q2G248_C126	Q2G248	SFVFGPUSVESFEQVEAVAK	SAOUHSC_01852	Uncharacterized protein	no		no	1.204		0.581404		0.760391		0.0423901		1.19774	1.21026	0.464145	0.698663	0.785174	0.735609	0.0311128	0.0536674
Q2FWE2_C209	Q2FWE2	IDGIVQAEQSEEGLESTVLDUTSFPYK	SAOUHSC_02357	Threonylcarbamoyl-AMP synthase	yes	Functional site	no	1.14396		1.4442						1.24787	1.04005	1.36715	1.52125
Q2G115_C306	Q2G115	QGMTAPQUAGIIHTDFER	ychF	Ribosome-binding ATPase YchF	no		no	1.97577		1.04425		-0.441009				2.16537	1.78618	1.20339	0.885106	-0.330157	-0.55186
Q2FXM3_C218	Q2FXM3	MLPFQGYVLQHFELMDDGFUQVK	SAOUHSC_01812	Uncharacterized protein	no		no	1.5936		0.974134						1.69924	1.48795	1.02935	0.91892
Q2FV74_C295	Q2FV74	AUVDLSIQYIPQR	clpL	ATP-dependent Clp protease ATP-binding subunit ClpL	no		no	2.01942		1.64083		-0.380854		-0.719984		2.18034	1.8585	1.60431	1.67735	-0.44841	-0.313298	-0.945777	-0.49419
Q2G2J8_C226	Q2G2J8	ALLDLUDLITVMPVER	SAOUHSC_01413	Uncharacterized protein SAOUHSC_01413	no		no	2.25538		1.20683		0.0250266		-0.930299		2.43392	2.07683	1.23039	1.18326	0.0817487	-0.0316954	-0.967081	-0.893518
Q2FZX4_C41	Q2FZX4	NLNTVUEEAK	lipA	Lipoyl synthase	no	Functional site	no	1.54275		0.797065		0.343874		-0.149917		1.64624	1.43927	0.708565	0.885565	0.337092	0.350656	-0.13181	-0.168025
Q2FXQ7_C16	Q2FXQ7	CSFUGKDQDQVK	clpX	ATP-dependent Clp protease ATP-binding subunit ClpX	no		no	1.77788		1.98671		-0.293571		-0.944909		1.92212	1.63365	1.93731	2.03611	-0.199581	-0.387561	-1.03491	-0.854904
Q2FY72_C48	Q2FY72	ELVYHNGAVAVUAVTPK	SAOUHSC_01593	NUDIX domain protein	no		no	1.93932		1.31899		0.226509		-0.963095		2.07307	1.80558	1.26843	1.36955	0.30871	0.144307	-0.974007	-0.952182
Q2FXU0_C64	Q2FXU0	GFIIGUPVAYSMGIGFAPVR	apt	Adenine phosphoribosyltransferase	no		no	0.767723		0.871572		0.709776		0.147794		0.897026	0.63842	0.773378	0.969765	0.736686	0.682866	0.131325	0.164263
P95689_C356	P95689	EISSCSNUTDFQAR	serS	Serine--tRNA ligase	yes	Functional site	no	1.4325		0.971799		-0.0214307		0.107419		1.47571	1.38929	0.798507	1.14509	-0.0869057	0.0440443	-0.0324099	0.247249
Q2G078_C430	Q2G078	DISUNLGSLNIVNVMESGK	SAOUHSC_00742	Ribonucleoside-diphosphate reductase	yes		no	2.67801		1.10832		-0.163142		-1.13635		3.0235	2.33251	1.10427	1.11237	-0.131693	-0.194592	-1.2253	-1.0474
Q2FWG1_C215	Q2FWG1	HTHGTGUTFSAVITAELAK	SAOUHSC_02330	Phosphomethylpyrimidine kinase	no		no	2.46236								2.71927	2.20546
Q2FZ43_C110	Q2FZ43	ADHIVFIUGHYEGYDER	trmD	tRNA (guanine-N(1)-)-methyltransferase	yes	Functional site	no	1.6353		0.725076		0.28324		-0.192515		1.83742	1.43317	0.74192	0.708231	0.313942	0.252537	-0.164383	-0.220648
Q2FXP0_C285	Q2FXP0	NSHYUPVCQK	SAOUHSC_01796	Formamidopyrimidine-DNA glycosylase	no		no	0.308716		1.41838		0.828616		-0.106889		0.272262	0.345169	1.48949	1.34727	0.885262	0.77197	-0.138426	-0.0753528
Q2G234_C131	Q2G234	YAGYDNUGDPAEK	SAOUHSC_02134	Nitric oxide synthase oxygenase	no		no	2.59542		0.360623		0.0168435		-0.541502		2.83611	2.35473	0.408929	0.312317	0.0321008	0.00158609	-0.530552	-0.552453
Q2G1D8_C653	Q2G1D8	IPYDUCK	pflB	Formate acetyltransferase	no		no	1.59923				0.951397		-0.142041		1.83047	1.36799			1.01628	0.886511	-0.0110332	-0.273048
Q2G0I8_C196	Q2G0I8	LUEDPQYMSHVK	SAOUHSC_00577	Mevalonate kinase, putative	yes		no	1.78117		0.674559		-0.0593596				1.93772	1.62462	0.613249	0.735869	-0.187871	0.0691522
Q2G255_C99	Q2G255	EYDLDLLHMHYAVPHAIUGILAR	SAOUHSC_01475	Uncharacterized protein	no		no	2.39068								2.97207	1.80929
Q2FZR5_C173	Q2FZR5	IVIATALAUEPK	SAOUHSC_00925	Uncharacterized protein	no		no	2.47768		0.934723		-0.218449		-0.804673		2.74556	2.2098	0.879	0.990447	-0.0603521	-0.376545	-0.780859	-0.828486
Q2FWD9_C145	Q2FWD9	LQAVUAVCGSSSSR	tdk	Thymidine kinase	no	Functional site	no	0.852478		1.78272		0.278504		-0.53004		0.991173	0.713784	1.774	1.79144	0.338909	0.218099	-0.459219	-0.600862
Q2G038_C250	Q2G038	QAGQPFIDYVIUSTQTFNAQVLK	SAOUHSC_00788	Gluconeogenesis factor	yes		no	1.73427		1.44215		-0.128484		-0.664575		1.92311	1.54542	1.41938	1.46493	-0.0292936	-0.227675	-0.658675	-0.670475
Q2FY19_C134	Q2FY19	HKLEVYGVCESUQD	fur	Ferric uptake regulation protein	no		no	0.685981				1.65775		0.037866		0.689299	0.682663			1.22194	2.09356	0.258338	-0.182606
Q2G1I7_C135	Q2G1I7	TYVUEDMSK	SAOUHSC_00135	Uncharacterized protein	no		no	0.322418		0.565702		1.49128				0.470303	0.174534	0.418676	0.712728	1.23303	1.74953
Q2G234_C354	Q2G234	ESNANQUPFHH	SAOUHSC_02134	Nitric oxide synthase oxygenase	no		no	2.36647								2.63015	2.10279
Q2FY27_C237	Q2FY27	AGDQFUIFITEK	SAOUHSC_01646	Glucokinase, putative	no		no	1.63735		1.62912		0.339501		-1.24601		1.74648	1.52822	1.60041	1.65782	0.405666	0.273337	-1.2623	-1.22972
Q2FZC7_C181	Q2FZC7	CMTCGVCLEVUPNVTENNK	SAOUHSC_01105	Iron-sulphur subunit of succinate dehydrogenase, putative	no		no	2.35155								2.8429	1.86021
Q2FV13_C18	Q2FV13	SYVIEELDDULTIQK	SAOUHSC_02930	Uncharacterized protein	no		no	0.832894		1.31541		0.657163		-0.463768		1.32175	0.344033	1.22027	1.41056	0.688494	0.625832	-0.441027	-0.486509
Q2FXM0_C163	Q2FXM0	RHPVDVUFVPIGDNFTMGIDDASYAINEFIKPK	SAOUHSC_01815	UPF0173 metal-dependent hydrolase SAOUHSC_01815	no		no	2.33254								2.65526	2.00981
Q2FWD9_C12	Q2FWD9	MYETYHSGWIEUITGSMFSGK	tdk	Thymidine kinase	no	Functional site	no	1.92365		0.399556						2.01924	1.82806	0.354339	0.444773
Q2FZ02_C145	Q2FZ02	ERPDILIGVUGCMSQEESVVNK	miaB	tRNA-2-methylthio-N(6)-dimethylallyladenosine synthase	no	Functional site	no	2.31697								1.35857	3.27538
Q2FXY7_C306	Q2FXY7	MNPMVYUGLFPIDNK	lepA	Elongation factor 4	no		no	2.31315								2.58376	2.04254
O06446_C831	O06446	NDDCPUGSGK	secA1	Protein translocase subunit SecA 1	yes	Functional site	no			2.00019		0.140283		0.170626				1.77144	2.22893	0.143685	0.136881	0.233996	0.107257
Q2FXI7_C197	Q2FXI7	ILNTAFLNEIEAQUQGEMLVAVPHQDVLIIADIR	SAOUHSC_01859	UPF0354 protein SAOUHSC_01859	no		no	1.06913		1.63903				-0.398191		1.15231	0.985938	1.6255	1.65256			-0.267288	-0.529094
Q2G064_C153	Q2G064	AGIVEIMEAIUYLQEHPEIK	pepT	Peptidase T	no		no	0.759393		1.54571						1.01635	0.502432	1.50162	1.58981
Q2FZJ4_C180	Q2FZJ4	LIETSEUVAEK	purK	N5-carboxyaminoimidazole ribonucleotide synthase	no	Functional site	no	1.08581		1.23795		0.280708		-0.309867		1.18618	0.985428	1.15316	1.32274	0.331705	0.229711	-0.284107	-0.335626
Q2FZ50_C95	Q2FZ50	ATIVUEPSLVIFANK	rnc	Ribonuclease 3	no		no	1.82818		1.01193		0.256277		-0.804292		2.14444	1.51192	0.941557	1.08229	0.236952	0.275603	-0.811321	-0.797263
Q2FVU4_C471	Q2FVU4	ENIKDVTNUTTR	SAOUHSC_02597	PTS system component, putative	no	Functional site	no	2.20543		0.269411		0.11893		-0.303162		2.40801	2.00285	0.0285692	0.510253	0.176706	0.0611541	-0.260117	-0.346206
Q2G039_C30	Q2G039	SLVIQULEDMGYFCVDNLPPVLLPK	SAOUHSC_00787	Nucleotide-binding protein SAOUHSC_00787	no	Functional site	no	1.25887		1.18062		-0.154799				1.4061	1.11163	1.33302	1.02822	-0.175517	-0.134081
Q2FZP0_C494	Q2FZP0	ISUSDNFIVK	SAOUHSC_00960	Uncharacterized protein	no		no	1.62075		0.820881		0.150879		-0.322266		1.76077	1.48073	0.509645	1.13212	0.126841	0.174918	-0.406312	-0.238221
Q2G2R8_C238	Q2G2R8	ETQGNNGWUAGYTMSELLNATYNTNK	sspP	Staphopain A	no	Functional site	no	2.2607								1.65081	2.87058
Q2FWH3_C286	Q2FWH3	ATDUSGLVR	ddl	D-alanine--D-alanine ligase	yes		no			1.73847		0.669566		-0.148209				1.72111	1.75583	0.471552	0.86758	-0.149281	-0.147138
Q2G0S8_C139	Q2G0S8	IGTDIPFUIYNK	SAOUHSC_00466	Putative 4-diphosphocytidyl-2-C-methyl-D-erythritol kinase	no	Functional site	no	1.7545		1.11696		0.283035		-0.909603		1.53212	1.97688	1.11982	1.1141	0.483777	0.0822938	-0.872763	-0.946444
Q2FUZ6_C38	Q2FUZ6	VILVVNTATEUIYSEQLK	SAOUHSC_02949	Glutathione peroxidase	no	Functional site	no	0.835274		1.40079						1.05325	0.617298	1.3744	1.42718
Q2FZV8_C103	Q2FZV8	QSLMGGGFQIDNPNAIASCGUGSSFR	SAOUHSC_00877	Uncharacterized protein	no		no	1.89675		0.929514		-0.600488				1.85627	1.93723	0.917546	0.941482	-0.584804	-0.616171
Q2FYZ5_C384	Q2FYZ5	ATLESLUYQTR	glpK	Glycerol kinase	no		no	1.05546		1.11014		0.343975		-0.301373		1.18485	0.926075	1.02928	1.19099	0.38648	0.301471	-0.264495	-0.33825
Q2G1H4_C81	Q2G1H4	TUIPPLVEK	argC	N-acetyl-gamma-glutamyl-phosphate reductase	no		no			1.89399		0.743449		-0.443567				2.1141	1.67387	0.788769	0.69813	-0.328978	-0.558155
Q2G163_C158	Q2G163	TNVTVIUAGAK	psuG	Pseudouridine-5'-phosphate glycosidase	no	Functional site	no	2.27332		-0.00138466		0.278205		-0.356463		2.46686	2.07977	0.0483757	-0.051145	-0.117146	0.673556	-0.311291	-0.401635
Q2G124_C88	Q2G124	VUGSGLK	SAOUHSC_00336	Probable acetyl-CoA acyltransferase	yes	Functional site	no	1.00573		1.99529		-0.408619		-0.40534		1.21661	0.794853	1.75035	2.24022	-0.309574	-0.507665	-0.379995	-0.430684
Q2G002_C216	Q2G002	TAQGVFGGALTYGUIGVPQAPGQIDVTDLK	aroD	3-dehydroquinate dehydratase	no		no	1.8739		1.19887		-0.18428		-0.716612		1.95561	1.79219	1.09072	1.30702	-0.170248	-0.198312	-0.688567	-0.744656
Q2FVT8_C225	Q2FVT8	VNUVAPGPFWSPLQISGGQPQSK	SAOUHSC_02604	Uncharacterized protein	no		no	1.02519		1.35923		0.380995		-0.594444		1.17358	0.876802	1.23499	1.48347	0.43189	0.330099	-0.556818	-0.63207
Q2G139_C125	Q2G139	WUNQLNK	SAOUHSC_00316	Uncharacterized protein	no		no	2.15798								1.39083	2.92513
Q2FWZ6_C22	Q2FWZ6	TSIUSVGMVK	SAOUHSC_02110	Uncharacterized protein	no		no	2.10114								2.27986	1.92243
Q2G094_C30	Q2G094	GYEHDGVIPUGALDTLAHEIANR	SAOUHSC_00727	Uncharacterized protein	no		no	2.09801								2.29013	1.90589
Q2G032_C96	Q2G032	DLNIDVVLEUTGFYTDKDK	SAOUHSC_00795	Glyceraldehyde-3-phosphate dehydrogenase	yes		no	0.172044		0.938104		0.620666		0.330735		0.19103	0.153058	0.736215	1.13999	0.661232	0.5801	0.366794	0.294677
Q2FYZ9_C630	Q2FYZ9	QVAIISIMAQMGAYVPUK	mutS	DNA mismatch repair protein MutS	no		no	2.03085								2.44411	1.61758
Q2G1G4_C124	Q2G1G4	FVATNIMDAQIDAIUDVLK	SAOUHSC_00160	Uncharacterized protein	no		no	1.59689		0.433698						1.65618	1.53759	0.268554	0.598842
Q2G2W9_C166	Q2G2W9	SLUCSTFLGDFEPVSIK	SAOUHSC_00455	Uncharacterized protein	no		no	2.02761								2.68661	1.3686
Q2FZG9_C297	Q2FZG9	HELLILUTGSQGEPMAALSR	rnj1	Ribonuclease J 1	yes		no	1.58885		0.752513				-0.31819		1.74291	1.43479	0.599984	0.905043			-0.566293	-0.0700878
Q2G2N4_C17	Q2G2N4	TLNNNVVVUTNNDQEVILIGK	glcT	Protein GlcT	no		no	2.41764				-0.398337				2.63145	2.20383			-0.304879	-0.491794
Q2FY49_C129	Q2FY49	TLPGNAQSIGAILDQINWEEVLGTICGDDTULIICR	argR	Arginine repressor	no		no	2.69718		0.953962		-0.557323		-1.07482		3.09743	2.29693	0.828632	1.07929	-0.52338	-0.591266	-1.39172	-0.757916
Q2FYZ5_C254	Q2FYZ5	TIDYHFYGQEVPIAGVAGDQQAALFGQAUFER	glpK	Glycerol kinase	no		no	0.876369		0.900359		0.374613		-0.148866		1.0043	0.74844	0.814677	0.98604	0.424828	0.324399	-0.0747487	-0.222984
Q2FXP5_C97	Q2FXP5	YLQUPCK	SAOUHSC_01791	Uncharacterized protein	yes		no			1.98851		0.0372488		-0.0274623				1.92342	2.0536	-0.0427986	0.117296	0.228234	-0.283158
Q2FWY3_C261	Q2FWY3	FINUEGGIR	SAOUHSC_02138	Uncharacterized protein	no		no	1.59497		1.26281		-0.0841127		-0.77789		1.70487	1.48507	1.19862	1.327	-0.0445086	-0.123717	-0.804048	-0.751732
Q2G0I7_C278	Q2G0I7	EAGYPUYFTMDAGPNVK	SAOUHSC_00578	Diphosphomevalonate decarboxylase	yes		no	1.99444								2.06736	1.92151
Q2G0R6_C202	Q2G0R6	SDGADNVVTUPLYELDHDENAFNNLTSVFVPK	SAOUHSC_00480	Uncharacterized protein	no		no	0.731696		1.26209						0.824809	0.638584	1.12928	1.3949
Q2FZC7_C174	Q2FZC7	CMTUGVCLEVCPNVTENNK	SAOUHSC_01105	Iron-sulphur subunit of succinate dehydrogenase, putative	no		no			1.98399								2.47316	1.49483
Q2FWB9_C37	Q2FWB9	SVUVNPTHVK	deoC	Deoxyribose-phosphate aldolase	no		no	0.994127		1.46661		0.283551		-0.769173		1.16247	0.825786	1.41315	1.52007	0.290188	0.276913	-0.760309	-0.778036
Q2FZV7_C238	Q2FZV7	IATPIVAUNEK	SAOUHSC_00878	NADH dehydrogenase-like protein SAOUHSC_00878	no		no	1.88029		0.976935		0.272048		-1.15859		2.07464	1.68594	0.80421	1.14966	0.352533	0.191563	-1.11827	-1.19891
Q2G025_C115	Q2G025	GIVTMUAPMGGK	SAOUHSC_00802	Carboxylesterase, putative	no		no	1.40613		0.558879						1.63831	1.17396	0.699729	0.418028
Q2FXU5_C565	Q2FXU5	TASATULLTNAPSEVSDK	aspS	Aspartate--tRNA ligase	yes		no	1.56641		1.124		-0.214081		-0.527469		1.7641	1.36871	0.982065	1.26594	-0.226159	-0.202003	-0.422334	-0.632603
Q2G2W4_C31	Q2G2W4	MIUAYCNINR	SAOUHSC_02631	Uncharacterized protein	no	Functional site	no	1.9482								2.41908	1.47731
Q2FZV6_C127	Q2FZV6	YDQLSDVLMAUGIQSER	SAOUHSC_00879	Probable cytosol aminopeptidase	no		no	1.9447								2.02258	1.86683
Q2FZY4_C66	Q2FZY4	FEGEGUSISMASASMMTQAVK	SAOUHSC_00850	Uncharacterized protein	yes		no	1.93805								2.10883	1.76727
Q2FZ73_C248	Q2FZ73	IPFFGIULGHQLFALSQGASSFK	carA	Carbamoyl-phosphate synthase small chain	no	Functional site	no	1.92795								2.06609	1.78981
Q2G0T5_C493	Q2G0T5	SSIESVVUNIVNK	dnaX	DNA polymerase III subunit gamma/tau	yes		no	1.45738		1.26995		0.339764		-1.14207		1.51954	1.39523	1.14117	1.39873	0.340619	0.338909	-1.21702	-1.06712
Q2FVG8_C207	Q2FVG8	IUIMSEGK	SAOUHSC_02744	Amino acid ABC transporter, ATP-binding protein, putative	no		no	1.92471								1.9428	1.90662
Q2FZW1_C15	Q2FZW1	MEHVSVVVYGADVIUASCVNAPTSK	SAOUHSC_00874	Uncharacterized protein	no		no	1.91723								2.07851	1.75596
Q2FUS7_C252	Q2FUS7	DWFDGKPUER	SAOUHSC_03024	UPF0176 protein SAOUHSC_03024	no		no					1.91353								1.66389	2.16318
A0A0H3KE27_C18	A0A0H3KE27	GLIDESLTUQDK	rsbU	sigma factor sigB regulation protein	no		no			1.54406		0.668649		-0.32894				1.51935	1.56877	0.697418	0.63988	-0.24513	-0.41275
Q2FWY3_C150	Q2FWY3	SUSFEGFIDYSGER	SAOUHSC_02138	Uncharacterized protein	no		no	1.88095								2.04883	1.71308
Q2FXF9_C245	Q2FXF9	SUDLTTILHNLYK	SAOUHSC_01889	Riboflavin biosynthesis protein RibD	no		no	1.54957		1.38235		-0.12997		-0.931859		1.50833	1.59082	1.26016	1.50454	-0.106034	-0.153906	-0.952179	-0.911539
Q2FY08_C137	Q2FY08	IIDDEGIVUPVSK	glyQS	Glycine--tRNA ligase	yes		no	1.5211		1.09986		-0.017136		-0.734405		1.67571	1.3665	1.08615	1.11357	0.061966	-0.0962381	-0.707484	-0.761327
Q2FW59_C112	Q2FW59	EKDDNILUEEFSYK	SAOUHSC_02458	Uncharacterized protein	no		no	0.62273		1.26515		0.682381		-0.704148		0.643764	0.601697	1.37228	1.15801	0.793521	0.57124	-0.673854	-0.734443
Q2FZZ2_C164	Q2FZZ2	ALANDPTVLLUDEATSALDPQTTDEILDLLLK	metN2	Methionine import ATP-binding protein MetN 2	no		no	1.84994		0.875646		-0.247627		-0.612142		2.05676	1.64312	0.868766	0.882526	-0.229146	-0.266108	-0.586276	-0.638007
Q2G0P6_C270	Q2G0P6	SLGILQNUR	mcsB	Protein-arginine kinase	no		no	1.09068		1.00757		0.38257		-0.615619		1.2587	0.922655	0.644133	1.371	0.48656	0.27858	-0.593725	-0.637513
Q2G182_C31	Q2G182	DIEAUQK	esxB	ESAT-6 secretion system extracellular protein B	no		no	1.8367								2.67947	0.993928
Q2FYZ5_C111	Q2FYZ5	QTQSIUSELK	glpK	Glycerol kinase	no		no	0.816792		0.91723		0.392855		-0.291002		0.953079	0.680504	0.843695	0.990766	0.440262	0.345448	-0.30927	-0.272733
Q2FYS0_C115	Q2FYS0	TDAGQIYTGTIULHETSVHVYR	SAOUHSC_01365	Uncharacterized protein	no		no	1.81796								1.852	1.78392
Q2FZZ6_C210	Q2FZZ6	SMFGGYDELMEPVUNTFTAK	SAOUHSC_00838	Uncharacterized protein	no		no	1.81332								1.85408	1.77256
Q2FZJ0_C55	Q2FZJ0	QPNFTETGIFSVMWSEHUSYK	purL	Phosphoribosylformylglycinamidine synthase subunit PurL	no	Functional site	no			1.80999								1.96647	1.65352
Q2G2M8_C97	Q2G2M8	EDGIYYYCNLSSPFVUDEEALK	SAOUHSC_02004	UPF0374 protein SAOUHSC_02004	no		no	1.20055		1.30893		-0.166956		-0.540583		1.16684	1.23426	0.97673	1.64113	-0.0428134	-0.291098	-0.328	-0.753166
Q2G0M6_C293	Q2G0M6	EMTMVMGTSTUHLMLNEK	araB	Ribulokinase	no		no	1.79957								2.38347	1.21566
Q2FVV9_C271	Q2FVV9	TVCTYCGVGUSFEVWTK	SAOUHSC_02582	Putative formate dehydrogenase SAOUHSC_02582	no	Functional site	no	1.79759								1.85862	1.73656
Q2FWX1_C63	Q2FWX1	VLVITEDWUGDAMMNLPILK	SAOUHSC_02150	Uncharacterized protein	no		no	1.32713		0.458372						1.58655	1.06771	0.160404	0.75634
Q2FYR0_C248	Q2FYR0	HINNNAQAIUK	SAOUHSC_01375	Uncharacterized protein	no		no	1.50192		1.10847		0.168125		-0.997293		1.60375	1.40009	1.12935	1.0876	0.312781	0.0234683	-0.858018	-1.13657
Q2G0G1_C89	Q2G0G1	VSIAWMFESUGR	adh	Alcohol dehydrogenase	no	Functional site	no			1.77713								1.99928	1.55498
Q2FYH5_C106	Q2FYH5	AFKDUNIQYRPK	dinG	Probable ATP-dependent helicase DinG homolog	no		no	1.7765								1.69439	1.85862
Q2G0S2_C255	Q2G0S2	EVYAUCTHPVLSGPAK	prs	Ribose-phosphate pyrophosphokinase	yes		no	1.10859		1.03195		0.112306		-0.521687		0.920176	1.29701	0.98448	1.07943	0.0762334	0.148379	-0.567061	-0.476313
Q2G157_C10	Q2G157	MLPHGLIVSUQALPDEPLHSSFIMSK	nanE	Putative N-acetylmannosamine-6-phosphate 2-epimerase	no		no	0.713992		1.01252						0.859174	0.56881	1.18929	0.835762
Q2G0V2_C164	Q2G0V2	ILLUDEATSALDPATTASILTLLK	metN1	Methionine import ATP-binding protein MetN 1	no		no	1.72628								1.74308	1.70947
Q2FY27_C252	Q2FY27	VANYIGYLUSIISVTSNPK	SAOUHSC_01646	Glucokinase, putative	no		no	1.71987		1.47193		-0.0547253		-1.4126		1.77248	1.66726	1.34937	1.5945	0.0149265	-0.124377	-1.33924	-1.48596
Q2G1G7_C224	Q2G1G7	QLIDFUK	SAOUHSC_00156	Uncharacterized protein	no		no	1.52434		1.62321		-0.161721		-1.26637		1.61476	1.43392	1.43622	1.8102	-0.0843185	-0.239123	-1.25154	-1.28121
Q2FXX2_C98	Q2FXX2	NIDISNDEIYNLMIYQLGALQGFUR	SAOUHSC_01708	UPF0271 protein SAOUHSC_01708	no		no	0.65574		1.25306		0.162149		-0.352456		0.793319	0.518161	1.13609	1.37004	0.1894	0.134897	-0.419	-0.285913
Q2G1X6_C136	Q2G1X6	HIITGVCETDFSGYPDUR	queC	7-cyano-7-deazaguanine synthase	no		no			2.22643				-0.523002				3.14048	1.31237			-0.362659	-0.683344
Q2G1K2_C101	Q2G1K2	EQPDALLILGDTNSULAAVSAK	SAOUHSC_00120	UDP-N-acetylglucosamine 2-epimerase	no		no	0.754466		1.35444		0.16398		-0.572374		0.800082	0.708849	1.26861	1.44026	0.154065	0.173895	-0.641671	-0.503078
Q2FWE2_C304	Q2FWE2	VAFIPSEAQFIQLUQDDNDVK	SAOUHSC_02357	Threonylcarbamoyl-AMP synthase	yes		no			1.60317		0.639887		-0.551414				1.45312	1.75322	0.611928	0.667847	-0.426878	-0.67595
Q2FWF5_C134	Q2FWF5	ATVDGQLAUSCELTFAIQDVK	fabZ	3-hydroxyacyl-[acyl-carrier-protein] dehydratase FabZ	yes		no	1.69063								1.80793	1.57333
Q2FWY3_C197	Q2FWY3	NVIIEDUYFGPSELPEMGSWNR	SAOUHSC_02138	Uncharacterized protein	no		no	1.68741								1.8439	1.53092
Q2G1X6_C23	Q2G1X6	AIVVFSGGQDSTTULFYAK	queC	7-cyano-7-deazaguanine synthase	no	Functional site	no	1.68622								1.85296	1.51949
Q2G2F1_C200	Q2G2F1	YUDRFIILDEGEVVAFGDLEALR	SAOUHSC_01967	ABC transporter, ATP-binding protein, putative	no		no	1.68581								1.63636	1.73526
Q2G1Z9_C154	Q2G1Z9	FRGDGLUVSTPSGSTAYNK	nadK	NAD kinase	yes	Functional site	no	2.09992						-0.415893		2.27059	1.92926					-0.281807	-0.549979
Q2G0W1_C640	Q2G0W1	LLAMIUNRPNVR	SAOUHSC_00413	UPF0753 protein SAOUHSC_00413	no		no	1.6757								1.45165	1.89976
Q2FY49_C124	Q2FY49	TLPGNAQSIGAILDQINWEEVLGTIUGDDTCLIICR	argR	Arginine repressor	no		no	1.75876		1.03106		-0.400506		-0.717082		1.25749	2.26003	1.16002	0.902112	-0.174833	-0.626179	-0.152917	-1.28125
Q2FZY4_C41	Q2FZY4	GVLDNGSMTVDMNNPTUGDR	SAOUHSC_00850	Uncharacterized protein	yes		no	1.67134								1.76837	1.5743
Q2FZ66_C300	Q2FZ66	GLNUHVNLIPVNHVPER	rlmN	Probable dual-specificity RNA methyltransferase RlmN	no		no	2.77855				-0.131231		-0.978402		3.13567	2.42143			-0.103581	-0.15888	-0.567618	-1.38919
Q2FYV2_C82	Q2FYV2	YSVDLPNLUIEMR	thrB	Homoserine kinase	no		no	1.65972								1.91491	1.40452
Q2FYG5_C110	Q2FYG5	VLKPGGMVVULETSQPTLPVFK	SAOUHSC_01487	Menaquinone biosynthesis methyltransferase, putative	no		no	1.14709		0.507715						1.23088	1.0633	0.320773	0.694657
Q2FYG9_C341	Q2FYG9	SDSUAVPAASIVCEHVVAFEIAK	aroC	Chorismate synthase	no	Functional site	no	1.52342		0.635549		0.0237116		-0.52844		1.75766	1.28919	0.703455	0.567643	0.0483757	-0.000952493	-0.47279	-0.58409
Q2FYG9_C350	Q2FYG9	SDSCAVPAASIVUEHVVAFEIAK	aroC	Chorismate synthase	no		no			1.65269								1.45454	1.85084
Q2FYR6_C113	Q2FYR6	TTLPVLUKDFIIDPLQIDVAK	trpC	Indole-3-glycerol phosphate synthase	no		no	1.34168		1.11772		0.0103555		-0.83018		1.37523	1.30813	0.867896	1.36754	-0.0528351	0.0735461	-0.910909	-0.749451
Q9RQQ0_C55	Q9RQQ0	CUFDYLNNIIMMNQNK	icaR	Biofilm operon icaADBC HTH-type negative transcriptional regulator IcaR	no		no	1.63653								1.72369	1.54937
Q2FYJ1_C61	Q2FYJ1	PTHVAVUWDMGQSTFR	SAOUHSC_01454	Uncharacterized protein	no		no	1.62436								1.48718	1.76154
Q2FXY7_C431	Q2FXY7	ATMMVPNDYVGAVMELUQR	lepA	Elongation factor 4	no		no	1.62345								1.68764	1.55925
Q2FV60_C274	Q2FV60	ILUTADFPSVAESLMPDFAPIK	crtN	Dehydrosqualene desaturase	no		no	1.59562								1.91046	1.28078
Q2G046_C122	Q2G046	VGKPYUPNHNIEIESQTVQQMVDR	uvrA	UvrABC system protein A	no		no	1.29423		1.22008				-0.926479		1.42734	1.16111	1.34727	1.09288			-1.45637	-0.396593
Q2FV10_C175	Q2FV10	IAPALATGUSLVMKPSEITPLTTIR	SAOUHSC_02933	Betaine aldehyde dehydrogenase	no		no	1.51785		-0.0537176		0.109192				1.6234	1.41229	-0.0893901	-0.0180451	0.160275	0.0581086
Q2G0R8_C645	Q2G0R8	LLUGDVGYGK	mfd	Transcription-repair-coupling factor	no	Functional site	no			1.81002		0.33451		-0.573459				1.73205	1.88799	0.393416	0.275603	-0.657536	-0.489382
Q2G1C0_C196	Q2G1C0	SILSDAUK	tarI	Ribitol-5-phosphate cytidylyltransferase 1	yes		no	1.07002		0.658692		0.152288		-0.321988		1.22021	0.919836	0.519542	0.797843	0.160791	0.143785	-0.31775	-0.326227
Q2G147_C90	Q2G147	GAVNMUCILEQDTSIYGDFQR	SAOUHSC_00308	Lipoate--protein ligase	no		no	1.55676								1.61424	1.49927
Q2G0S8_C209	Q2G0S8	DYQQLUQSLSNR	SAOUHSC_00466	Putative 4-diphosphocytidyl-2-C-methyl-D-erythritol kinase	no		no	1.33737		0.95349		0.250614		-0.990784		1.53719	1.13754	0.984553	0.922426	0.395282	0.105946	-1.15557	-0.826003
Q2G1H9_C2313	Q2G1H9	SLLEUVK	SAOUHSC_00144	Uncharacterized protein	no		no					1.48907		0.0476159						1.78203	1.1961	-0.172604	0.267835
Q2G0Q2_C310	Q2G0Q2	SIFPSUR	SAOUHSC_00497	Uncharacterized protein	no		no	1.77429		1.12524		-0.437395		-0.926067		1.78245	1.76613	0.90049	1.34999	-0.420067	-0.454723	-0.853605	-0.998529
Q2G1G5_C27	Q2G1G5	IIAAVGGMDNIDSVMNUMTR	SAOUHSC_00158	PTS system EIIBC component SAOUHSC_00158	no	Functional site	no	1.53568								1.74339	1.32797
Q2FYV5_C118	Q2FYV5	RLLDALLSUGEDFNAQLIALYNNSQGIPTK	SAOUHSC_01319	Aspartokinase	no		no	1.6872				-0.151853				1.48414	1.89025			0.0847446	-0.38845
Q2G1Y9_C38	Q2G1Y9	TFMCDDUK	SAOUHSC_01060	Uncharacterized protein	no		no	1.52598								1.62854	1.42342
Q2FV63_C13	Q2FV63	SQEILNVEGMSUGHCK	copZ	Copper chaperone CopZ	no	Functional site	no	2.62233		0.521482		-1.63548				2.18447	3.06019	0.372395	0.670568	-1.41823	-1.85272
Q2G198_C2	Q2G198	UTGFTIQTLNNQVLLGR	SAOUHSC_00247	Uncharacterized protein	no		no	1.50136								1.73751	1.2652
Q2FZV4_C50	Q2FZV4	QPFGYLHGGASIALGETAUSLGSANLIDTTK	SAOUHSC_00881	Uncharacterized protein	yes		no	0.292308		0.947845		0.346047		-0.0975653		0.442078	0.142538	0.95306	0.942629	0.296375	0.39572	-0.0201429	-0.174988
Q2FZ55_C55	Q2FZ55	HUSEKIEMEDEPVR	plsX	Phosphate acyltransferase	yes		no	0.987171		0.298425		0.19948				1.15043	0.823912	0.0648829	0.531968	0.11836	0.2806
Q2FXR3_C242	Q2FXR3	ELESDLKEGUDMMIVKPALSYLDIVR	hemB	Delta-aminolevulinic acid dehydratase	no		no	1.48239								1.49349	1.47129
Q2FXM8_C232	Q2FXM8	HSIVLVAEGCMTAQDUQK	pfkA	ATP-dependent 6-phosphofructokinase	yes		no					1.47813								1.59651	1.35975
Q2FV60_C69	Q2FV60	DVFTAUGK	crtN	Dehydrosqualene desaturase	no		no	1.47614								1.62471	1.32757
O52582_C16	O52582	IVVVGAVAGGATUASQIR	cdr	Coenzyme A disulfide reductase	no	Functional site	no	1.79539		-0.455216		0.0862815		0.0456224		1.9991	1.59168	-0.565417	-0.345015	0.158208	0.0143553	0.329296	-0.238051
Q2FXW5_C307	Q2FXW5	VIDAYAADPDNFKINPEWLIELDKUANR	SAOUHSC_01716	Uncharacterized protein	no		no	1.4623								1.09849	1.82611
Q2G1X6_C126	Q2G1X6	HIITGVUETDFSGYPDCR	queC	7-cyano-7-deazaguanine synthase	no		no					1.30201		0.155553						1.46514	1.13888	0.13606	0.175045
Q2FVT2_C86	Q2FVT2	QAFAGLPDLNQUETLVDYGNVYHDHEELIDTQK	hutG	Formimidoylglutamase	no		no	1.44082								1.66161	1.22002
Q2FWM0_C292	Q2FWM0	TIHYNYFEAGQUAMEEIQQMLK	SAOUHSC_02269	Sucrose operon repressor, putative	no		no	1.42176								1.75429	1.08923
Q2FV16_C275	Q2FV16	HLGGFPISGQFLAUTNPQVIEQHDAK	mqo	Probable malate:quinone oxidoreductase	no		no			1.11711		0.781597		-0.477061				1.07066	1.16356	0.832444	0.730749	-0.54848	-0.405643
Q2FV86_C123	Q2FV86	LUEDVAVYNHQIEK	SAOUHSC_02849	Pyruvate oxidase, putative	no		no	1.57983		0.886037		-0.274101		-0.776148		1.65727	1.50238	0.856233	0.915842	-0.262295	-0.285907	-0.718438	-0.833858
Q2G2R0_C63	Q2G2R0	VGEQVVSGNADLGVUICGTGVGINNAVNKVPGVR	lacB	Galactose-6-phosphate isomerase subunit LacB	no		no					1.21018		0.198552						1.1435	1.27686	0.260387	0.136716
Q2FVV9_C592	Q2FVV9	GHNNVQGUSDMGSMPDK	SAOUHSC_02582	Putative formate dehydrogenase SAOUHSC_02582	no		no	1.40509								1.53745	1.27274
Q2FY11_C168	Q2FY11	GIGFAPDSSHFUHDFLQK	dnaG	DNA primase	yes		no	2.03681				-0.635983				2.77602	1.2976			-0.50271	-0.769256
Q2FWJ6_C101	Q2FWJ6	FUNSIESYQQR	SAOUHSC_02296	Protein SprT-like	no		no	1.38669								1.35552	1.41787
Q2FV41_C158	Q2FV41	VNSLAYUSSK	SAOUHSC_02898	Uncharacterized protein	no		no	0.818559		0.573678		0.213938		-0.23083		0.922807	0.714311	0.550802	0.596554	0.214498	0.213378	-0.159364	-0.302297
Q2FVV7_C185	Q2FVV7	LVGAUGLDSMR	SAOUHSC_02584	Uncharacterized protein	no	Functional site	no	0.752227		0.618664						0.916706	0.587749	0.49334	0.743989
Q2G0Q1_C130	Q2G0Q1	DQFTVPFVCGUR	pdxS	Pyridoxal 5'-phosphate synthase subunit PdxS	no		no	0.885379		0.812322		0.0900949		-0.417083		0.922788	0.84797	0.565819	1.05882	-0.136875	0.317065	-0.782281	-0.0518853
Q2G2G2_C17	Q2G2G2	THLLIVDDEQDIVDIUQTYFEYEGYK	saeR	Response regulator SaeR	no		no	1.59714		0.71478		-0.337075		-0.606365		1.60914	1.58514	0.583327	0.846233	-0.290356	-0.383793	-0.635674	-0.577057
Q2FXW9_C234	Q2FXW9	IATVUKFDLPK	SAOUHSC_01711	Uncharacterized protein	no		no	0.505201		0.728765		0.337776		-0.213766		0.609755	0.400647	0.737514	0.720016	0.363003	0.312549	-0.0581425	-0.36939
Q2G1G2_C372	Q2G1G2	VVFIIDEUHR	SAOUHSC_00162	Type I restriction enzyme R Protein	no		no	1.47523		0.512771		0.0148357		-0.649703		1.70514	1.24531	0.574634	0.450908	-0.016191	0.0458623	-0.56902	-0.730387
Q2G1K2_C123	Q2G1K2	IPVFHMEAGNRUFDQNVPEEINRK	SAOUHSC_00120	UDP-N-acetylglucosamine 2-epimerase	no		no	1.35167								1.68057	1.02278
Q2FWL2_C287	Q2FWL2	QSLADQUK	tsaD	tRNA N6-adenosine threonylcarbamoyltransferase	yes		no	1.84451		0.803275		-0.0112278		-1.28788		1.95498	1.73405	0.747774	0.858777	0.0231844	-0.0456399	-1.25406	-1.32171
Q2FZ18_C438	Q2FZ18	SVUINGIITSILLNAKPHEVK	SAOUHSC_01253	Uncharacterized protein	no	Functional site	no			1.47876		0.465297		-0.614157				1.43221	1.52532	0.584289	0.346305	-0.589724	-0.638591
Q2FZT4_C200	Q2FZT4	SLTGGUPMGPYIVTK	SAOUHSC_00906	Uncharacterized protein SAOUHSC_00906	no		no	0.826236		0.85759		0.00976897		-0.371311		1.05154	0.600927	0.8837	0.83148	-0.00151057	0.0210485	-0.372433	-0.370188
Q2FZI7_C156	Q2FZI7	KUDIRPDDSKEQLEEK	purN	Phosphoribosylglycinamide formyltransferase	no		no	1.25285		0.983727		0.156841		-1.07458		1.48011	1.0256	0.770533	1.19692	0.190678	0.123004	-1.08458	-1.06459
Q2G1X7_C148	Q2G1X7	KLDEVITQUVPSSLNLK	queE	7-carboxy-7-deazaguanine synthase	no		no			1.77871		0.498998		-0.972385				1.53197	2.02545	0.446997	0.550999	-0.874349	-1.07042
Q2G2L7_C210	Q2G2L7	YRDLLKEUATEITEVEDK	SAOUHSC_02811	Uncharacterized protein	no		no	1.29865								1.2756	1.3217
Q2G2U5_C253	Q2G2U5	MSVGQVLNEHDIDTEKEVLLUDTDKAIPTPIYTI	SAOUHSC_00024	Uncharacterized protein	no		no	1.29796								0.953302	1.64261
Q2FY65_C230	Q2FY65	FLPGKHUAK	SAOUHSC_01600	Uncharacterized protein	no		no	1.50092				0.235412		-0.451445		1.5708	1.43103			0.171463	0.299362	-0.323895	-0.578995
Q2FWD5_C32	Q2FWD5	CNDUSAHFSDMK	SAOUHSC_02364	Uncharacterized protein	no		no	1.28461								1.37312	1.1961
Q2FV10_C380	Q2FV10	DGLFFEPTVITNUDTSMR	SAOUHSC_02933	Betaine aldehyde dehydrogenase	no		no	1.2679								1.31858	1.21723
P0A011_C276	P0A011	FNGVLUGR	lacD	Tagatose 1,6-diphosphate aldolase	no		no	1.38626		0.976235		-0.264705		-0.843331		1.38681	1.38571	0.835439	1.11703	-0.215161	-0.314248	-0.76901	-0.917652
Q2G280_C44	Q2G280	DNTPTUTTEACDFRDNLEMFNDLDVAVYGISGDSK	SAOUHSC_01999	Uncharacterized protein	no	Functional site	no	1.23737								0.95293	1.5218
Q2G280_C49	Q2G280	DNTPTCTTEAUDFRDNLEMFNDLDVAVYGISGDSK	SAOUHSC_01999	Uncharacterized protein	no	Functional site	no	1.23737								0.95293	1.5218
Q2FYV3_C36	Q2FYV3	LTLNEGNTPLIHUENMSK	SAOUHSC_01321	Threonine synthase	no		no	1.23412								1.3467	1.12155
Q2FZ86_C164	Q2FZ86	VGTDIFLUTPDNVEVAGSITDHIENMEHSFD	sepF	Cell division protein SepF	yes		no	1.21705		0.262593		-0.24894				1.38217	1.05193	0.35321	0.171975	-0.174166	-0.323715
Q2FZJ0_C32	Q2FZJ0	VUDILGR	purL	Phosphoribosylformylglycinamidine synthase subunit PurL	no		no			1.59568		0.393796		-0.773991			2.71419	1.58578	1.60559	0.397584	0.390007	-0.685826	-0.862156
Q2FVA1_C19	Q2FVA1	QLVDNUDLNFYLGQINHIVGK	SAOUHSC_02832	Uncharacterized protein	no		no	1.21329								1.06005	1.36653
Q2FYH6_C396	Q2FYH6	YGSVPHUGFGLGLER	asnS	Asparagine--tRNA ligase	no		no	1.22785		1.54551		-0.679347		-0.881705		1.32786	1.12784	1.57163	1.5194	-0.657992	-0.700702	-0.805635	-0.957775
Q2G0U0_C27	Q2G0U0	ENLEAATHUVTR	SAOUHSC_00437	Uncharacterized protein	no	Functional site	no	0.0708867		0.386141		0.679392		0.0712467		0.360113	-0.21834	0.0996075	0.672674	0.760203	0.598581	0.0780523	0.064441
Q2G0L8_C64	Q2G0L8	AFYEAQAPVADTDLTVPYIULNGAEVR	SAOUHSC_00542	Uncharacterized protein	no		no	1.36643		0.653854		-0.189632		-0.624243		1.63343	1.09943	0.472592	0.835116	-0.289122	-0.0901424	-0.64539	-0.603095
Q2G146_C76	Q2G146	LMFVEADLSQDEHWDEAMKDUK	SAOUHSC_00309	Uncharacterized protein	no		no	0.888704		0.304349						0.985719	0.791689	0.677801	-0.0691037
Q2G1J4_C92	Q2G1J4	SUDISLVMR	SAOUHSC_00128	Cap5O protein/UDP-N-acetyl-D-mannosaminuronic acid dehydrogenase	no		no	0.967317		0.222581						1.83891	0.0957219	-0.0756872	0.52085
Q2FZP0_C133	Q2FZP0	FPWLSANIEYNVTKEPYFSTPYUIK	SAOUHSC_00960	Uncharacterized protein	no		no	1.37558		0.134229				-0.327726		1.28623	1.46493	0.0867838	0.181675			-0.417367	-0.238085
Q2FY67_C215	Q2FY67	QGPVVAIFGDTKPUSNER	rnz	Ribonuclease Z	yes	Functional site	no			0.605421		0.559465		0.0145842				-0.219337	1.43018	0.236952	0.881978	-0.376171	0.405339
Q2G2A1_C48	Q2G2A1	IIAGGYNGSVAGEVHCIDEGULIEDGHCIR	SAOUHSC_01692	Uncharacterized protein	no		no					1.17105								1.22373	1.11836
Q2FZI6_C260	Q2FZI6	HMNPUGVGIGDTIEQAFQHAYEADSQSIFGGIVALNR	purH	Bifunctional purine biosynthesis protein PurH	no		no	1.17071								1.37484	0.966578
O05154_C69	O05154	HISLIQLQNASIATUINK	tagX	Putative glycosyltransferase TagX	no		no	1.88783						-0.718278		2.69492	1.08073					-0.707336	-0.72922
Q2FZC4_C55	Q2FZC4	GNUDFYPEFENEAVAK	SAOUHSC_01108	Phosphoesterase	no		no			1.166								1.1626	1.16941
Q2G0W0_C56	Q2G0W0	VUSTNEGLLNIK	SAOUHSC_00414	Uncharacterized protein	no		no	1.77704		0.0960504		-0.185791		-0.525206		1.94257	1.61152	-0.0246371	0.216738	-0.0449402	-0.326643	-0.533095	-0.517317
Q2G1T2_C7	Q2G1T2	MDNHNQUNYVNPQNVSLDWECFIISK	SAOUHSC_00826	Uncharacterized protein	no		no					1.14939								0.258459	2.04033
Q2FXP0_C268	Q2FXP0	VUGSQIETK	SAOUHSC_01796	Formamidopyrimidine-DNA glycosylase	no		no	-0.621586		1.73488		0.794243		-0.758353		-0.835291	-0.40788	1.59469	1.87507	0.603787	0.984699	-0.85598	-0.660726
O50581_C585	O50581	SDQQSYUVLIASPK	recG	ATP-dependent DNA helicase RecG	no		no	1.13991								1.12148	1.15834
Q2FZ31_C191	Q2FZ31	YDKGEAAYLNUPMTEDEFNR	trmFO	Methylenetetrahydrofolate--tRNA-(uracil-5-)-methyltransferase TrmFO	no		no	1.13622								1.09381	1.17862
Q2FXY5_C299	Q2FXY5	HYQLDELLNIIDAUAETDYK	SAOUHSC_01690	Uncharacterized protein	yes		no	1.12888								1.52822	0.729531
Q2FZ67_C325	Q2FZ67	ILVDAPUSGLGVMR	SAOUHSC_01184	16S rRNA (cytosine(967)-C(5))-methyltransferase	no	Functional site	no	0.924867		0.20195						1.15588	0.693855	0.188781	0.215119
Q2FY55_C142	Q2FY55	HQIEGHDVMNVINQLQTLFNKYUEER	SAOUHSC_01610	UPF0403 protein SAOUHSC_01610	no		no	1.12551								1.25363	0.997401
Q2FVE6_C63	Q2FVE6	NVKGEYETVVMAUTADAYYDTLQQLSLETLQSVK	SAOUHSC_02768	Uncharacterized protein	no		no	1.1217								1.16575	1.07765
Q2G1G6_C245	Q2G1G6	IIQEIUAITYDEAMALYQVSEHDVK	murQ	N-acetylmuramic acid 6-phosphate etherase	no		no	1.61457		0.88229		-0.15483		-1.23487		1.8088	1.42035	0.696528	1.06805	-0.172457	-0.137203	-1.42121	-1.04853
Q2FXH2_C159	Q2FXH2	GLAYVDEVAVNWUPALGTVLSNEEVIDGVSER	leuS	Leucine--tRNA ligase	yes		no	1.23687		0.753252		-0.329744		-0.561985		1.34948	1.12426	0.725523	0.780982	-0.326082	-0.333407	-0.552199	-0.571772
Q2FXH0_C52	Q2FXH0	DGTVAHGGUTFCSAAGSGDFAGNR	SAOUHSC_01877	Uncharacterized protein	no		no					1.16756		-0.0738732						1.22169	1.11343	0.0289934	-0.17674
Q2FVY1_C130	Q2FVY1	NEEELQVLQQLSNVUYSINVR	SAOUHSC_02541	Molybdopterin-guanine dinucleotide biosynthesis protein MobB	no		no	1.0376		0.388106		0.34773		-0.680965		1.2969	0.778293	0.261711	0.514501	0.319502	0.375957	-0.637962	-0.723968
Q2G2X0_C145	Q2G2X0	HEIMUTLEDCMIAAR	SAOUHSC_00457	Uncharacterized protein	no		no	1.03834								0.192194	1.88448
Q2G0M9_C254	Q2G0M9	QAVLSFGMIQAGTTDSVIPDQAFUK	SAOUHSC_00531	Uncharacterized protein	no		no			1.7185		0.167652		-0.849363				1.5591	1.8779	0.17645	0.158854	-0.659563	-1.03916
Q2FZF1_C47	Q2FZF1	NUGSYNGEEVAAK	rpmF	50S ribosomal protein L32	yes		no	0.791644		1.08997		0.117515		-0.962654		0.976657	0.606632	0.905043	1.27489	0.179001	0.0560285	-0.899426	-1.02588
Q2G2W8_C96	Q2G2W8	HGEDULFCLEVLSD	SAOUHSC_00456	Initiation-control protein YabA	no		no			1.91635		-5.07154e-05		-0.890685				1.95315	1.87955	0.0764223	-0.0765237	-0.925495	-0.855875
Q2G255_C7	Q2G255	IGITUYPSMGGSGIIATELGIK	SAOUHSC_01475	Uncharacterized protein	no		no			1.02468								1.1173	0.932061
Q2G090_C45	Q2G090	SIUYQVPGLLLGGTTIVISPLISLMK	SAOUHSC_00730	ATP-dependent DNA helicase RecQ	no		no	1.00997								1.10185	0.918081
P0A011_C85	P0A011	DUGLLLAYEK	lacD	Tagatose 1,6-diphosphate aldolase	no		no	1.41999		1.00517		-0.390786		-1.03069		1.54102	1.29895	0.920979	1.08936	-0.19598	-0.585591	-1.00955	-1.05183
Q2G2N9_C66	Q2G2N9	IIGLSGMUK	SAOUHSC_02248	Uncharacterized protein	no		no	0.999302								1.19043	0.808179
Q2FV86_C413	Q2FV86	FIISSWLGTMGUGLPGAIASK	SAOUHSC_02849	Pyruvate oxidase, putative	no		no	0.55041		0.924945		-0.0767519		-0.423762		0.691891	0.408929	0.91104	0.93885	0.0133551	-0.166859	-0.519052	-0.328471
Q9ZAH5_C311	Q9ZAH5	VUMDQTIVK	alr1	Alanine racemase 1	no	Functional site	no	0.227249		1.67054		0.0715898		-1.00764		0.359129	0.0953689	1.6987	1.64239	0.0951157	0.0480639	-0.901985	-1.11329
Q2G0I8_C234	Q2G0I8	ASDVIEHHNFEALADIFNEUHADLK	SAOUHSC_00577	Mevalonate kinase, putative	yes		no	1.3024		0.941304		-0.171634		-1.12545		1.40016	1.20464	0.867896	1.01471	-0.197137	-0.146132	-1.08835	-1.16256
Q2G2T7_C9	Q2G2T7	VVIPUFNEGEVITQTHQQLTEILSQDSSVK	SAOUHSC_00713	Uncharacterized protein	no		no	0.921727								0.983167	0.860287
Q2G0A0_C122	Q2G0A0	SUENYSHISVSGGLR	SAOUHSC_00705	Cys-tRNA(Pro)/Cys-tRNA(Cys) deacylase	no		no	1.32504				-0.404159				1.41539	1.23468			-0.379407	-0.428911
O50581_C305	O50581	TVVAAIUMYALK	recG	ATP-dependent DNA helicase RecG	no		no	0.918851								1.72067	0.11703
Q2FVV9_C37	Q2FVV9	SQDTFVPSIUYNESMGPIQTCDTCTVEIDGK	SAOUHSC_02582	Putative formate dehydrogenase SAOUHSC_02582	no	Functional site	no	0.787306				0.128248				1.08107	0.493545			0.373954	-0.117459
Q2FX05_C123	Q2FX05	VUDVATMAFENAIAK	map	Methionine aminopeptidase	yes		no	1.64524		-0.131783		-0.0656246		-0.54034		1.81496	1.47551	-0.369305	0.105739	0.0142124	-0.145462	-0.499443	-0.581238
Q2FZW0_C271	Q2FZW0	NVYVVGDUADLPHAPSAQLAEVQGDQIADVLK	SAOUHSC_00875	Uncharacterized protein	no		no	1.31865		0.781586		-0.4156		-0.77897		1.5115	1.12579	0.781745	0.781426	-0.368705	-0.462495	-0.689614	-0.868326
Q2FZC8_C44	Q2FZC8	SHSVUAQGGINGAVNTK	SAOUHSC_01104	Succinate dehydrogenase, flavoprotein chain TC0881, putative	no		no	1.9929		0.183965		-0.581427		-0.72297		1.97691	2.00888	0.207268	0.160662	-0.547236	-0.615619	-0.512864	-0.933077
Q2G072_C48	Q2G072	STLLSAIUR	SAOUHSC_00748	Uncharacterized protein	no		no			0.976256		0.399742		-0.512006				1.09119	0.86132	0.145873	0.65361	-0.523774	-0.500238
Q2G084_C36	Q2G084	NINQGIGEVTTALSSIUK	SAOUHSC_00736	Putative lipid kinase SAOUHSC_00736	no		no	0.915364		0.621472		0.00576169		-0.689931		1.07601	0.754717	0.498353	0.744592	0.0199154	-0.00839199	-0.645322	-0.734539
Q2G2R7_C14	Q2G2R7	FKUNSEAK	SAOUHSC_02129	Uncharacterized protein	no		no	1.74789						-0.899068		1.78073	1.71506					-0.902983	-0.895153
Q2FZ72_C34	Q2FZ72	TILVIGSGPIIIGQAAEFDYAGTQAULALK	carB	Carbamoyl-phosphate synthase large chain	no		no	1.18017		0.777407		-0.125067		-0.997109		1.08372	1.27662	0.943359	0.611456	-0.0222731	-0.227861	-1.06695	-0.927267
Q2FV76_C111	Q2FV76	EAUYAATPAIQLAK	SAOUHSC_02860	HMG-CoA synthase, putative	yes		no	1.54877		0.596107		-0.511249		-0.801414		1.70066	1.39687	0.263635	0.928579	-0.468691	-0.553807	-0.741276	-0.861552
Q2FZV8_C37	Q2FZV8	VNGGGUTGLTYGMGAEEAPGENDEVLEYFGLK	SAOUHSC_00877	Uncharacterized protein	no		no	0.805113								1.46383	0.146395
Q2G1E1_C7	Q2G1E1	VVIUDDER	SAOUHSC_00184	Uncharacterized response regulatory protein SAOUHSC_00184	no		no	0.793908								0.66821	0.919607
Q2FZ29_C169	Q2FZ29	VAADIUVFTNDNIVVETL	hslV	ATP-dependent protease subunit HslV	no	Functional site	no	-0.184891		0.541591		0.418865		0.0169632		-0.0646006	-0.305182	0.0919367	0.991245	0.522859	0.314871	0.0531113	-0.019185
Q2G0W1_C424	Q2G0W1	AQIAFUIDVR	SAOUHSC_00413	UPF0753 protein SAOUHSC_00413	no		no	1.37786		0.117952		-0.714629				1.56769	1.18802	0.310922	-0.0750184	-0.77554	-0.653718
Q2G1G8_C447	Q2G1G8	HLDAUITR	ptsG	PTS system glucose-specific EIICBA component	no	Functional site	no	0.423767		0.630077		0.487279		-0.77146		0.4728	0.374733	0.372395	0.887759	0.627233	0.347325	-0.632092	-0.910827
Q2FXV8_C675	Q2FXV8	QDMMELTHAYUTSIHK	recD2	ATP-dependent RecD-like DNA helicase	no		no	0.767209								0.909428	0.62499
[truncated: 1,025 more rows]

## Sheet: 100 µM 1
Identifier	Leading razor protein	Sequence	Median log2(R) 100 µM 1	Neg. log10(p)	T-test significant	Hit?	log2(R) 100 µM 1 replicate 1	log2(R) 100 µM 1 replicate 2
[truncated: 1,304 more rows]

[truncated: 3 more sheets: 50 µM 1, 20 µM 1, 10 µM 1]
